# Supplementary material for: A novel machine learning algorithm selects proteome signature to specifically identify cancer exosomes
Source: eLife. 2024 Mar 26;12:RP90390. doi: 10.7554/eLife.90390 (PMC10965221; doi:10.7554/eLife.90390)
Supplement: Figure 2—source data 1. [file elife-90390-fig2-data1.csv]

Rontogianni et al	Hurwitz el al	Hoshino et al	Kugeratski et al
RBM47	TRBC2	POTEF	AARS
UBA6	E2F8	HSPA8	ABCE1
ESYT2	UBA6	GNAT3	ABCF1
KIAA1598	ESYT2	C4A	ACAA2
ARHGAP10	KIAA1598	ATP1A2	ACACA
SLC22A23	SHISA3	ALB	ACAD9
FAM168B	SLC22A23	ITIH4	ACADM
ILVBL	FAM168B	IGLL5	ACADVL
C1orf226	PXDNL	KRT35	ACAT1
PLEKHG3	ILVBL	GNB2	ACAT2
SH3PXD2B	TSPAN11	KRT19	ACIN1
NBAS	SSC5D	FGG	ACLY
KLRG2	PIPSL	C1QB	ACO1
VPS37C	FUOM	FGB	ACO2
TRAPPC13	SBNO1	SELENOP	ACOT7
CNOT1	CPED1	CD36	ACP1
MAP1LC3B;MAP1LC3B2	LRRD1	HBD	ACSL3
C2orf72	WDR91	C8B	ACSL4
PALM3	KLRG2	SLC3A2	ACTC1
PGP	EFCAB5	UBC	ACTL6A
SMCHD1	XIRP2	ABCB9	ACTN1
RGPD3;RGPD4	VPS37C	C4B_2	ACTN4
FAM127A;FAM127C	CNOT1	KRT8	ACTR1A
ARHGAP32	MAP1LC3B	MASP1	ACTR2
A2ML1	KLHL33	CFH	ACTR3
FAM171A2	KRT87P	HBA2	ADA
SNRPG;SNRPGP15	C2orf72	SERPINA3	ADAR
SMIM1	OR6C74	CFI	ADH5
UMAD1	PGP	FN1	ADK
NACA	C5orf51	KLKB1	ADSL
DNASE2	FAM186A	CLU	ADSS
AGPS	ANKUB1	HYI	AGR2
KIF2A	ANKRD61	CFB	AGRN
DDX39A	TUBAL3	ACTG1	AHCY
PDLIM1	FBLL1	TNC	AHCYL1
ACOT7	SMCHD1	KRT13	AHNAK
MYO1C	NCF1	KRT9	AHNAK2
SNAP23	UNC119B	APOC40APOC2	AHSA1
AIP	SLC15A5	APOC1	AIFM1
GTPBP1	TRIM75P	LGALS3BP	AIMP1
STXBP3	TSPY1	MASP2	AIMP2
ARVCF	CGB1	APOL1	AIP
RAB27B	NA	CEP290	AK1
AP3B1	CCDC169	STX7	AK2
RHOD	ANKRD36	CD5L	AKR1A1
LGALS8	FAM127A	FCN3	AKR1B1
NDUFS8	ARHGAP32	KRT36	AKR1C1
NFKBIE	A2ML1	F13A1	AKR7A2
PSMD11	CYSRT1	HPR	ALDH18A1
PSMD12	GNAT3	PLG	ALDH1A3
PSMD9	MEI4	CA1	ALDH1B1
ATOX1	SNRPG	CA2	ALDH7A1
PGRMC1	UPK3BL	SERPINC1	ALDH9A1
SUPT5H	MYO1G	SERPINA1	ALDOA
DFFA	LINC00587	A2M	ALYREF
HIP1	SMIM1	KNG1	ANP32A
CLIC1	SRRM5	JCHAIN	ANP32B
EIF3F	ANKRD66	PIGR	ANPEP
WWP2	ERVV-2	IGHG1	ANXA1
PDHX	GPR89B	IGHG2	ANXA11
MATN2	HNRNPCL4	IGHG4	ANXA2
QSOX1	IGLL5	IGHA1	ANXA3
SLC33A1	TMEM238	HBZ	ANXA4
WASL	NACA	HBE1	ANXA5
IPO5	SMIM22	KRT14	ANXA6
CCRL2	AGPS	KRT6A	ANXA7
SAP18	KIF2A	APOA1	AP1B1
IGF2BP3	DDX39A	APOE	AP1G1
DNM1L	PDLIM1	APOC3	AP2A1
RTCA	ACOT7	FGA	AP2B1
PIK3C2A	MYO1C	SLC4A1	AP2M1
IFRD1	MYO1F	CRP	AP3D1
PIK3R2	SNAP23	APCS	APEH
GOLIM4	AIP	C1QA	APEX1
AGRN	GTPBP1	C1QC	APMAP
PLOD2	LGALS9	APOH	APOA1BP
EXOC5	STXBP3	AMBP	APRT
HMGN4	ARVCF	ORM1	ARCN1
NDUFA4	SMAP	TTR	ARF1
PSMD14	RAB27B	PF4	ARF4
BIN1	AP3B1	TFRC	ARF6
KPNA3	SULT2B1	LTF	ARHGAP1
STK25	RHOD	HPX	ARHGDIA
LAD1	LGALS8	FTL	ARHGDIB
PES1	NDUFS8	FTH1	ARHGEF2
SDCBP	TNFRSF10A	C4BPA	ARL3
PITPNM1	PSMD11	VTN	ARPC1A
MPHOSPH10	PSMD12	APOB	ARPC1B
NOP56	PSMD9	HRG	ARPC2
DDX3X;DDX3Y	ATOX1	KRT6B	ARPC3
RNASET2	PGRMC1	KRT1	ARPC4-TTLL3
PODXL	SUPT5H	VWF	ARPC5
CYR61	DFFA	GNAI2	ASNS
PIR	HIP1	ATP1A1	ASPH
KPNA4	LEFTY1	APOD	ASS1
NTN3	CLIC1	S100A8	ATAD3A
TRIM38	TNFRSF11B	SERPING1	ATIC
PPP6C	EIF3F	F13B	ATL3
CES2	WWP2	KRT18	ATOX1
MAN2B1	PDHX	IGKV401	ATP1A1
UBE2C	SULT1C2	S100A9	ATP1B3
PDXK	MATN2	S100A6	ATP2A2
SCD	QSOX1	APOA4	ATP2B4
CLDN4	DCTN6	C8A	ATP5A1
PPAP2A	SLC33A1	C8G	ATP5B
ARID1A	WASL	PFN1	ATP5C1
TXNDC9	IPO5	HSPA1A	ATP5F1
TRAFD1	CCRL2	LPA	ATP5H
COX7A2L	SAP18	SERPINF2	ATP5J
NDUFAB1	IGF2BP3	KRT7	ATP5O
DYNC1I1	DNM1L	GNAI3	ATP6V1A
CIT	RTCA	KRT16	ATP6V1B2
COPE	PIK3C2A	GNAO1	ATXN2L
AP3D1	IFRD1	C1S	B2M
CCS	PIK3R2	POTEI	BAG2
ABLIM1	GOLIM4	POTEJ	BAG3
GOSR2	MANBA	SAA1	BANF1
IRS4	AGRN	SAA2	BASP1
TOR1A	PLOD2	PF4V1	BCAM
TOR1B	EXOC5	HSPA5	BCAP31
STX16	NDUFA4	SLC2A1	BLMH
ADAM10	PSMD14	KRT3	BLVRA
PTGES	BIN1	KRT10	BLVRB
RIOK3	KPNA3	KRT5	BOLA2
MAP2K7	STK25	GFAP	BPNT1
ACOT8	LAD1	HSP90B1	BSG
PDCD5	PES1	ANPEP	BTF3
PRMT5	SDCBP	EZR	BUB3
SLC9A3R1	MPHOSPH10	CD44	BZW1
CHEK1	NOP56	GNB3	BZW2
TNFRSF10B	DDX3X	HSPA6	C12orf10
TPP1	RNASET2	LBP	C14orf166
TCERG1	PODXL	KRT15	C1QBP
NDC80	CYR61	KRT4	C21orf33
NRP1	PIR	ORM2	CACYBP
TNPO2	KPNA4	ITIH2	CAD
HS3ST1	PPP6C	ITIH1	CALM2
MSTN	NME4	PZP	CALR
TNFRSF10C	CES2	C4BPB	CAND1
POLR3A	MAN2B1	MSN	CANX
TSPAN4	FBP2	STOM	CAP1
PSMA7	UBE2C	PON1	CAPG
SCAMP3	ACACB	YWHAQ	CAPN1
OPLAH	PDXK	CFP	CAPN2
BCKDK	SCD	YWHAB	CAPNS1
IFIT3	CLDN4	SFN	CAPRIN1
WNT9A	PPAP2A	S100A11	CAPZA1
TAX1BP3	PPAP2B	PRDX2	CAPZA2
GIPC1	ARID1A	HSPA1L	CAPZB
LIN7A	FCHO1	RDX	CARHSP1
IKBKB	DPYSL4	KRT20	CARM1
HAT1	COX7A2L	KRT2	CARS
CASK	GAPDHS	KRT6C	CAST
PLD2	HSPB6	HSPA2	CAT
MYL12A;MYL12B	NDUFAB1	ATP12A	CAV1
HGS	CYB561D2	DEFA1	CBR1
AURKA	DYNC1I1	DEFA3	CBX3
PPP1R12A	CIT	YWHAG	CBX5
GAK	COPE	YWHAE	CCAR2
HNRNPDL	GNGT2	GNB1	CCDC124
XPO1	AP3D1	RPS27A	CCDC47
BTAF1	CCS	UBA52	CCT2
ARHGEF10	ENPP3	GNAS	CCT3
SPTBN2	CHD1	GNAI1	CCT4
SEC16A	GOSR2	YWHAZ	CCT5
PLXNB2	TOR1A	ACTG2	CCT6A
SEMA3E	TOR1B	ACTA1	CCT7
U2SURP	STX16	HBB	CCT8
N4BP3	ADAM10	HBG1	CD109
KIF3B	EI24	HBG2	CD2AP
PFAS	PTGES	HBA1	CD44
ADAMTS3	ITGB1BP1	HSPG2	CD47
ERC2	IMPA2	CLTC	CD59
ANKRD28	CDIPT	KRT76	CD9
ARHGEF11	PDCD5	RHAG	CDC37
CHUK	PRMT5	CFHR3	CDC42
LSM1	SLC9A3R1	GNA12	CDC5L
NPC1	TNFRSF10B	CFHR1	CDK1
SCAMP1	TPP1	KRT17	CDV3
SCAMP2	NRP1	YWHAH	CELF1
ARPC1B	TNPO2	CD47	CFL1
ARPC2	HS3ST1	CTTN	CHD4
ARPC3	POLR3A	GNA13	CHMP4B
POLR1C	MRAS	KRT33B	CHMP5
PLSCR1	CAPN9	KRT72	CHORDC1
TRIM24	TSPAN4	PON3	CKAP4
PGRMC2	PSMA7	KRT31	CKAP5
PFDN6	SCAMP3	FCN2	CKB
NKRF	OPLAH	ECM1	CLIC1
GNPAT	IFIT3	UGT8	CLIC4
LAMA5	MGST3	KRT24	CLINT1
ZNF185	GEMIN2	ACTBL2	CLTA
MATN3	TAX1BP3	STEAP3	CLTB
CASC3	GIPC1	KRT80	CLTC
MRPS12	LIN7A	KRT74	CMPK1
NDUFA1	IKBKB	KRT25	CNBP
VGF	TIMM23	KRT77	CNDP2
RER1	HAT1	KRT73	CNN2
SURF4	UBE2L6	ALDH16A1	CNP
SPTLC1	CASK	OIT3	CNPY2
SPTLC2	PLD2	CFHR5	COL17A1
OGT	EREG	POTEKP	COL1A1
PMM2	UQCRQ	GNB4	COL1A2
CTAGE5;MIA2	UQCR11	KRT84	COL6A1
TM9SF1	HGS	C1RL	COL6A3
INPP4B	PPP1R12A	DAAM1	COLGALT1
MID1	GAK	IGLC3	COMT
HMGB3	HNRNPDL	IGHA2	COPA
PPM1G	XPO1	IGKV108	COPB1
INPPL1	BTAF1	IGKV2024	COPB2
EIF3D	PIP5K1B	IGKV2D024	COPE
EIF3H	ARHGEF10	IGKC	COPG1
BCAT2	PDZD2	IGHV307	COPS2
BIRC5	SPTBN2	IGHV3021	COPS3
NCAM2	SEC16A	IGHV3048	COPS4
IPO8	PLXNB2	IGHV3011	COPZ1
STX7	U2SURP	AHSG	CORO1A
SLC16A3	KIF3B	IGHV4059	CORO1B
ABCC3	PFAS	IGHV3033	CORO1C
ABCC5	ADAMTS3	IGHV3074	COTL1
P4HA2	DCLK1	IGHV5051	COX4I1
CAPN5	ANKRD28	IGKV3020	COX5A
YKT6	LSM1	IGKV1012	COX5B
ARPC5	FYB	IGKV106	COX6B1
PDPK1;PDPK2P	NPC1	IGKV1039	CPNE1
RNF113A	DEGS1	IGHV3OR1609	CPNE3
CLDN3	SCAMP1	IGHV1018	CPSF6
KCNN4	SCAMP2	IGHV3015	CPSF7
DHX15	ARPC1B	IGHV309	CRIP1
RNMT	ARPC2	IGLV309	CRYZ
ZZEF1	ARPC3	IGHV3005	CS
ASAP2	BET1	IGHV3OR16010	CSDE1
FLRT2	POLR1C	IGHV3043	CSE1L
TTI1	PLSCR1	IGHV3020	CSNK2A1
PLXNB1	PGRMC2	IGHV3073	CSNK2B
RRP8	CTDSPL	IGHV3038	CSRP1
CYB5B	VILL	ACTB	CSTB
PRPF4	EPHB6	ATP1A3	CSTF2
PHGDH	PFDN6	IGHV3023	CTNNA1
NDUFS4	NKRF	IGHV3053	CTNNB1
ADAM12	LAMA5	IGHV3013	CTNND1
GPR39	ZNF185	IGHV3064D	CTPS1
DYNC1LI2	MATN3	IGHV3072	CTSB
PSMD3	VGF	IGHV3064	CTSD
PAPSS1	LEPROT	IGHV3049	CTTN
ZW10	CLIC2	TTN	CUL4A
SPINT1	ACOX3	IGKV105	CYB5R3
SART1	RER1	IGKV2040	CYC1
SPINT2	SURF4	IGKV2D028	CYCS
ADCY6	MAPK13	COL6A1	CYFIP1
PPIP5K2	SPTLC1	GPX3	CYR61
MAP3K7	SPTLC2	IGHM	DARS
EEF1E1	OGT	IGHG3	DARS2
RIPK2	PMM2	IGLC7	DAZAP1
HNRNPR	INPP4B	IGHV1069D	DBN1
PRPF3	MID1	IGHV70401	DBNL
TXNL1	HMGB3	IGHV1069	DCTN1
TPD52L2	PPM1G	IGHV102	DCTN2
EMC8	INPPL1	IGHV1046	DCTPP1
GRID2	EIF3D	IGHV3OR16013	DDAH2
FIBP	EIF3H	IGHV4028	DDB1
EIF4G3	SLC16A4	IGHV4002	DDOST
PPIH	HDAC3	IGHV4039	DDX1
MGAM	BIRC5	IGHV404	DDX17
AKR7A2	NCAM2	IGHV4034	DDX19A
EPB41L2	IPO8	IGHV4OR1508	DDX21
TGOLN2	STX7	APOA2	DDX39A
LAMTOR5	SLC16A6	IGHV205	DDX39B
B4GAT1	SLC16A3	IGKV1D013	DDX3X
WIPF1	SLC31A1	IGHV601	DDX42
ATP8B1	ABCC3	IGLV3025	DDX46
CA12	ABCC4	IGHV1OR1501	DDX5
AKAP10	ABCC5	IGHV3OR16012	DDX6
SYT7	TLR3	SAA20SAA4	DECR1
DENR	P4HA2	IGKV1027	DEK
XPOT	MAGEB2	IGLV1044	DENR
TIMM44	CAPN5	IGLV2011	DHCR7
TRAPPC3	YKT6	IGLV1047	DHX15
CHMP2A	ARPC5	IGLV3021	DHX9
NCK2	DDX3Y	IGKV307	DIABLO
PSCA	TAPBP	IGHV2070D	DIAPH1
TSPAN6	FABP7	IGLV301	DKC1
PLRG1	CLDN3	IGHV2026	DLAT
PRC1	KCNN4	IGHV5001	DLD
RGS10	DHX15	IGHV103	DLST
ZNF207	RNMT	IGLV4069	DNAJA1
NDUFA2	ZZEF1	IGLV2014	DNAJA2
ASNA1	TTI1	IGLV4060	DNAJB1
BUB3	PLXNB1	PROS1	DNAJB11
PPAP2C	RRP8	C1R	DNAJC7
SIGLEC6	CYB5B	C4B	DNAJC8
ACTN4	PRPF4	IGLV1051	DNAJC9
HTATSF1	PHGDH	IGKV3OR20268	DNM1L
AP1G1	NDUFS4	IGLV3010	DNM2
STX6	ADAM12	IGHV108	DPP3
SYNGR1	GPR39	IGLV208	DPYSL2
SYNGR2	4-Sep	IGLV1040	DSG2
SGTA	DYNC1LI2	ZNF621	DSP
ENSA	KLK10	RELN	DSTN
NARS	PSMD3	SPTLC2	DTYMK
MYO1B	SLC7A4	F11	DUT
NUDT21	PAPSS1	IGKV3011	DYNC1H1
LANCL1	ZW10	GSN	DYNC1I2
STRN	SPINT1	CTSG	DYNC1LI1
AKAP8	B4GALT5	CPN1	DYNC1LI2
IDH3B	SPINT2	CFL1	DYNLL1
NRD1	TGFB1I1	ST13	ECH1
CALU	HSPA12A	S100A10	ECHS1
EDIL3	ADCY6	B2M	ECI1
AHCYL1	EEF1E1	PPIA	EDC4
KIF1C	HNRNPR	SIRPA	EDF1
NDUFS5	PRPF3	BASP1	EEF1A1
RAD21	TXNL1	SLC1A5	EEF1A2
AKR1B10	TPD52L2	SVEP1	EEF1B2
TIMM8A	EMC8	SHROOM3	EEF1D
DHX16	COCH	EHD1	EEF1G
SSSCA1	FIBP	SPTLC3	EEF2
BNIP3L	EIF4G3	EHD3	EFTUD2
PCDH7	PPIH	IGKV2D029	EGFR
PRPSAP2	KCNAB3	IGKV2030	EHD1
GNG7	MGAM	IGKV2D030	EHD2
SMARCA5	HTRA2	IGHV3035	EHD4
SPAG9	AKR7A2	IGLV3027	EIF1
SUSD5	PROM1	IGLV3019	EIF1AX
MGRN1	EPB41L2	IGKV1D033	EIF2A
SIPA1L3	TGOLN2	IGKV2029	EIF2S1
AQR	LAMTOR5	IGLV3016	EIF2S2
OPA1	B4GAT1	RAB37	EIF2S3
PIP5K1C	ATP8B1	RAB30	EIF3A
KIF1B	TGM5	RAB3D	EIF3B
FZD6	SGCE	F12	EIF3C
PPL	LAT	A1BG	EIF3D
NRP2	RNF13	RAB3A	EIF3E
MPZL2	CA12	RAB3B	EIF3F
ACSL4	SYT7	RAB6A	EIF3G
SNX3	DENR	CPN2	EIF3H
STX10	XPOT	RAB8A	EIF3I
MGEA5	SPRY2	RAB4B	EIF3J
SORBS3	DNPH1	RAB10	EIF3L
SYNCRIP	TIMM44	RAB14	EIF4A1
B4GALT3	TRAPPC3	ATP6V0D1	EIF4A2
B4GALT4	CHMP2A	RAB1A	EIF4A3
RANBP6	NCK2	RAB39A	EIF4B
GMDS	PSCA	RAB35	EIF4E
PLOD3	TSPAN6	RAB12	EIF4G1
DIAPH1	PLRG1	ADAMTS13	EIF4G2
15-Sep	PRC1	RAB43	EIF4H
TSPAN1	RGS10	RAB8B	EIF5
TSPAN2	ZNF207	RAB39B	EIF5A
EXOC3	NDUFB5	RAB3C	EIF5B
PDE8A	NDUFB3	RAB33B	EIF6
PLIN3	NDUFA2	RAB1B	ELAVL1
SLC16A7	ASNA1	RAB6B	EML4
PRMT3	BUB3	TLN1	ENO1
KPNA6;KPNA5	PPAP2C	RAB4A	ENO2
SRPX2	PI15	IGKV1016	EPB41L2
UGDH	SULT1B1	CCDC30	EPHA2
CTNND1	ACTN4	FBLN1	EPPK1
SNX2	GSTZ1	POSTN	EPRS
DPM1	WBSCR22	IBA570DT	ERH
USO1	HTATSF1	TUBA4A	ERLIN2
SLC19A2	ITM2A	CLEC3B	ERO1L
MRPS14	AP1G1	FLNA	ERP29
TOM1	STX6	COMP	ERP44
HIST1H2BK;H2BFS	SYNGR1	SDCBP	ESD
PFKFB2	SYNGR2	BMP7	ESYT1
CCDC22	SGTA	AHCYL2	ETF1
DKC1	NARS	SHBG	ETFA
EIF5B	MYO1B	AFP	ETFB
EDF1	NUDT21	QSOX1	EWSR1
DIAPH2	LANCL1	TECPR2	EZR
DNAJA2	RRP9	B4GALT5	FABP5
CUTA	IDH3B	AHCYL1	FAF2
CTSV	NRD1	H2BC12	FAM120A
PFDN1	CALU	WDR1	FAM129B
PPP1R11	EDIL3	XYLB	FAM49B
DTNB	ATP9B	FLNB	FAM98B
SRGAP2;SRGAP2C	AHCYL1	MYCBP2	FARSA
PLXNA2	TYROBP	APOM	FARSB
NOS1AP	NDUFS5	VNN1	FASN
IGSF3	PDE6D	PGK1	FBL
WDR1	RAD21	F10	FDFT1
FZD7	AKR1B10	ASS1	FDPS
SLIT3	TIMM8A	COL1A1	FDXR
ATP9A	DHX16	COL3A1	FEN1
ROCK2	SSSCA1	MT2A	FH
MFAP3L	GMFG	ALDOA	FHL2
CLASP2	PRPSAP2	TUBB4A	FKBP10
COBL	GNG7	GAPDH	FKBP1A
CPNE3	SMARCA5	MT1E	FKBP3
ICOSLG	ADCY3	AMY1A	FKBP4
PPFIA3	SPAG9	AMY2A	FLII
HIP1R	KIF5C	SERPINA7	FLNA
OBSL1	URB1	SERPIND1	FLNB
RNF40	MGRN1	ENO1	FLNC
ZC3H11A	LZTS3	GPI	FLOT1
CLUH	AQR	TUBB	FLOT2
DNAJC13	ATP10A	HSP90AA1	FSCN1
PPP6R2	OPA1	THBS1	FUBP1
ADAMTS4	PIP5K1C	HSP90AB1	FUBP3
ANKRD17	MAPKBP1	LTA4H	FUS
ATP2C2	KDM1A	IGF2R	FXR1
DNAJB6	TBC1D4	EEF2	G3BP1
LRP5	NME2P1	MT1G	G3BP2
GGCT	PPL	CD99	G6PD
NDUFS2	DFNA5	AKR1A1	GALNT2
ZPR1	LY75	PKM	GANAB
GBAS	NRP2	CPA1	GAPDH
SEMA7A	MAN1A2	CPB1	GARS
PDCD6	PLXNC1	AKR1B1	GART
TBCA	MPZL2	PGAM2	GBE1
ATP6V1G1	ACSL4	B4GALT1	GCN1L1
VPS4B	SNX3	H2AX	GDI1
MPDU1	STX10	IGFBP2	GDI2
BCAS1	MGEA5	VCL	GFPT1
H2AFY	ADCY9	PGAM1	GLG1
SH3BGRL	SYNCRIP	AMY2B	GLO1
FLNB	TPST1	H2AC7	GLOD4
NDUFS6	B4GALT3	OGN	GLRX3
PEX14	B4GALT4	ACO1	GLS
TRIM3	RANBP6	AHCY	GLUD1
CS	GMDS	PSMA4	GMFB
SEC22B	NMT2	MAPK3	GMPS
PRPF40A	PLOD3	ATP6V0C	GNA11
TACC1	EIF4E2	MAPK1	GNAI2
MTX2	TLR2	BLVRB	GNAI3
VPS26A	DIAPH1	GDI1	GNB1
PMPCB	15-Sep	MAT2A	GNB2
KATNA1	TSPAN1	THBS2	GNPDA1
PSIP1	TSPAN3	THBS4	GOT1
ERLIN1	EXOC3	MYH9	GPD2
GPC4	PLIN3	SERPINF1	GPI
NDUFS3	SLC16A7	TAGLN2	GPS1
SRSF10	JAK2	THBS3	GPX1
HSBP1	PRMT3	GDI2	GRB2
ECI2	KPNA6	RAB13	GRHPR
BANF1	SRPX2	LUM	GRPEL1
SF3B1	UGDH	PGD	GRSF1
CSDE1	LPXN	CTSC	GSN
WBP4	CTNND1	ADK	GSPT1
PRKRA	MAGEC1	H2BC5	GSR
ITGA10	EIF1B	TPI1	GSTK1
RPS6KA5	SNX2	PSMA6	GSTM3
MYCBP2	BCE1	KRTDAP	GSTO1
GCAT	DPM1	ARF3	GSTP1
NPM3	USO1	H2BC10	GTF2I
LYPLA1	SLC19A2	RAP1A	H2AFY
SNRNP200	MRPS14	EIF5A	HADH
TIPRL	TOM1	EEF1A1	HADHA
OFD1	HIST1H2BK	TUBB4B	HADHB
TOM1L1	PFKFB2	MT1X	HARS
PPM1B	PRAF2	ARF1	HCFC1
NUP155	DKC1	CAP1	HCLS1
RP2	EIF5B	SLC7A5	HDAC1
GJB3	GAS7	HGFAC	HDAC2
CRTAP	EDF1	EEF1A2	HDGF
PALM	KIN	ITIH3	HDLBP
ATP6AP2	DIAPH2	FMOD	HEL-S-109
CDC123	SH2D1A	LRP1	HEXB
BCAR3	DNAJA2	EFEMP1	HGS
EIF3G	BRD4	FSTL1	HIBADH
EIF3J	CUTA	CNTN1	HINT1
PSMD10	CTSV	TRAP1	HIST1H1B
ZMPSTE24	HUS1	ILK	HIST1H1E
IDH1	PFDN1	TUBB3	HIST1H3A
SCO1	NOL3	TUBA3C	HIST1H4A
ATRN	DTNB	TUBB2A	HIST2H2AA3
RBBP9	LILRA6	COTL1	HK1
STAM2	HSF2BP	FLNC	HLA-A
ALDH1L1	SRGAP2	PCOLCE	HMGA1
DHRS3	PLXNA2	PTGES3	HMGB1
BCAS2	IGSF3	RSU1	HMGB2
DCTN3	SDC3	H2AC20	HMGB3
DNAJC8	WDR1	H2BC21	HMGCS1
ATP5H	FZD7	MEP1A	HMGN2
TSPAN9	SLIT1	TUBB8	HMOX2
FLOT1	SLIT3	H2BC18	HN1L
TRIO	LRP4	VASN	HNRNPA0
ATP5L	ATP9A	TUBA1A	HNRNPA1
CPD	ROCK2	FERMT3	HNRNPA2B1
GLRX3	CPNE3	H2AC21	HNRNPA3
RSL1D1	HIP1R	PGAM4	HNRNPAB
WFS1	RNF40	H2BU1	HNRNPC
CLPX	CLUH	PNLDC1	HNRNPDL
NEBL	CAND2	NEO1	HNRNPF
SEC14L2	DNAJC13	H2AC6	HNRNPH1
STC2	ADAMTS4	BHMT	HNRNPH2
SNCG	CNOT3	H2BC1	HNRNPH3
CIAO1	DNAJB6	H2AC12	HNRNPK
PDE5A	XYLB	PGLYRP2	HNRNPL
SLC22A5	LRP5	H2BC15	HNRNPM
SRP72	TMEM127	OMD	HNRNPR
JTB	COQ9	TUBA1C	HNRNPU
DDAH1	GGCT	TUBB6	HNRNPUL1
URI1	NDUFS7	TUBB2B	HNRNPUL2
MTA2	NDUFS2	BHMT2	HP1BP3
STK10	ZPR1	TUBB1	HPRT1
GFPT2	GBAS	BRD9	HSD17B10
SLIT2	CILP	IL1RAP	HSD17B12
TOMM70A	PDCD6	TUBA8	HSD17B4
MYO1D	ALOX12B	SERPINA10	HSP90AA1
SEC24D	TBCA	PSMD13	HSP90AB1
UFL1	ATP6V1G1	PPIE	HSP90AB2P
FARP2	VPS4B	CLEC11A	HSP90B1
UBXN7	MPDU1	TLN2	HSPA1B
SUN1	H2AFY	PPIAL4A	HSPA4
PROSC	SH3BGRL	PCLO	HSPA4L
ERLIN2	FLNB	RAP1B	HSPA5
PRPF6	VAMP4	ACE	HSPA9
DKK1	NDUFS6	CPB2	HSPB1
FRYL	PEX14	RBP4	HSPD1
ENDOD1	TRIM3	COL1A2	HSPE1
GLS	SLC43A1	H2BE1	HSPH1
ABLIM3	CS	PEPD	HUWE1
SOGA1	SEC22B	LDHB	HYOU1
AP2A2	PRPF40A	DMBT1	IARS
SEC31A	CDC45	FAM47E0STBD1	IARS2
CLSTN1	LRCH4	ZGRF1	IDH1
CEP152	MTX2	MYL6	IDH2
TJP3	VPS26A	RHCE	IDH3A
UBR5	NDUFB1	TPM1	IDH3B
PRSS23	PMPCB	ANXA2	IDI1
NDUFB6	TECTA	CFD	IFI16
AKR7A3	MED24	CLIC1	IGF2BP2
ZFPL1	KATNA1	CLIC2	IGF2BP3
IKBKAP	PSIP1	ACTN4	IGF2R
GABARAP;GABARAPL1	ERLIN1	ATRN	ILF2
NDUFB8	GPC4	NEBL	ILF3
NDUFA7	NDUFS3	CAVIN2	ILK
VAMP5	SRSF10	LDHA	IMMT
RTN3	GMNN	AGT	IMPA1
LETM1	CLDN11	LRG1	IMPDH2
EPN2	TNFRSF21	PPBP	IPO4
ZRANB2	RBMXL2	ITGB3	IPO5
SNX4	BANF1	ITGB1	IPO7
LUC7L3	SF3B1	BCHE	IPO9
KIF20A	CSDE1	GP1BA	IQGAP1
KIF4A	DAB1	SERPINA6	ITGA2
SBF1	PRKRA	ITGA2B	ITGA3
GOSR1	CRCP	ENO2	ITGA6
LYPD3	LRP6	COL6A3	ITGB1
VAPB	RPS6KA5	ACTN1	ITGB4
MPZL1	MYCBP2	ENO3	JUP
NDUFC2	NPM3	MYL6B	KARS
NDUFA10	LYPLA1	UBA1	KHDRBS1
FKBP9	CREG1	AZGP1	KHSRP
PGLS	SNRNP200	SERPINA4	KIF5B
PAPSS2	TIPRL	MYH10	KLC1
SMC2	TOM1L1	ACTN2	KPNA2
ATG7	PPM1B	IGFALS	KPNA4
TACC2	UTP20	PGM1	KPNB1
TRIM16	NUP155	CFHR2	KRT18
LYPLA2	RP2	GP5	KRT19
IPO7	STK16	AFM	KRT2
ARIH2	WDHD1	LIMS1	KTN1
PGM3	CRTAP	ACLY	LAMB3
GCNT3	SLC25A12	APOC4	LAMC2
MOCS3	B3GALNT1	VCP	LAMP1
SVIL	PALM	CD81	LAP3
AHSA1	ATP6AP2	EIF4A1	LARP1
APOM	GRAP2	RHOA	LARS
ADAMTS2	RNASEH2A	LYZ	LASP1
PSMG1	CDC123	CALM1	LCP1
FMNL1	POP7	TMSB4X	LDHA
SGPL1	EIF3G	RAC1	LDHB
CLDN7	EIF3J	TPM4	LDLR
NSA2	CBR3	ACTN3	LETM1
SEC24A	PSMD10	PLCXD2	LGALS1
SEC24B	UPK1B	PSMD2	LGALS3
LPHN2	ZMPSTE24	APOF	LGALS3BP
VNN1	IDH1	CCIN	LIMA1
VNN2	SCO1	HABP2	LMAN1
ETHE1	ATRN	ADIPOQ	LMAN2
ACSL3	STAM2	TPM2	LMNA
POLR1A	ALDH1L1	LIMS2	LMNB1
ADCY5	TUSC2	TSPAN14	LMNB2
STAMBP	DGAT1	ANGPTL6	LONP1
NTN1	DHRS3	PDCD6IP	LPP
ASMTL	ARL6IP5	CNDP1	LRPPRC
FGFR1OP	DYSF	CLIC6	LRRC47
PPP1R3D	BCAS2	COLEC11	LRRC59
HERC2	DCTN3	C1QTNF3	LRRFIP1
RAB3D	DNAJC8	PARVB	LSS
SNAP29	ATP5H	CTNNBIP1	LTA4H
CRTAM	CABYR	PARVA	LUC7L2
OXSR1	TSPAN9	CLIC5	LYPLA2
HSPA4L	FLOT1	FETUB	MAGOHB
PTBP3	TRIO	PCYOX1	MANF
AP2A1	ATP5L	CFL2	MAP1B
STAU1	C1QL1	DERA	MAP2K1
TTC4	CPD	CLIC4	MAP2K2
TMEM50A	SASH3	FCGBP	MAP4
SDPR	GLRX3	COLEC10	MAPK1
BAG2	RSL1D1	IGKV3D020	MAPRE1
BAG3	WFS1	TPM3	MARCKS
MAP4K4	SEC14L2	LIMS4	MARS
AIFM1	STC2	CFHR4	MAT2A
CLDN1	SNCG	IGHV3OR1507	MAT2B
CLIC3	PDE5A	IGLV7043	MATR3
EML2	WISP2	IGLV7046	MCM2
GNA14	RGS20	IGHV2070	MCM3
TSPAN13	SLC22A5	IGLV2023	MCM4
TSPAN15	SRP72	IGLV5045	MCM5
BPNT1	DDAH1	IGKV1017	MCM6
DDAH2	B3GAT3	RHOC	MCM7
TXNDC12	ECM2	CD9	MCTS1
MBD3	MTA2	PRG4	MDH1
AGR2	ALDH1A2	IGLV8061	MDH2
GAS8	STK10	IGKV3D015	METAP2
NDUFB10	PRKD3	MAN1C1	MIF
CLPTM1	GFPT2	GGT3P	MMP1
TOMM40	TPPP	TUBAL3	MOB1A
PAK4	SLIT2	MYO1G	MPST
ACTL6A	LTN1	CAPZB	MRPS22
CYB5A	TOMM70A	PTPRC	MSH2
LDHA	IPO13	GNAQ	MSH6
GLUD1;GLUD2	MYO1D	ACTR3	MSN
DHFR	SEC24D	ABCC3	MTCH2
CYB5R3	UFL1	SNCA	MTHFD1
GSR	TMCC1	CYFIP2	MTPN
MT-CO2	PHF14	HLA0B	MVP
SOD1	TMEM63A	HLA0C	MYBBP1A
CP	FARP2	ARHGDIB	MYH10
F13A1	UBXN7	HLA0A	MYH9
PNP	PROSC	BAIAP2	MYL12B
HPRT1	ERLIN2	FABP5	MYL6
GOT2	PRPF6	ITGA6	MYO1B
EGFR	DKK1	RAB27B	MYO1C
PGK1	FRYL	PODXL	MYOF
AK1	ENDOD1	ADAM10	NAA15
F9	GLCE	SLC9A3R1	NACA
F10	GLS	ARPC1B	NAMPT
CFD	ABLIM3	ARPC2	NAP1L1
PLAU	RHOBTB3	ARPC3	NAP1L4
PLAT	USP19	ARPC5	NAPA
ADA	AP2A2	SERPINI2	NARS
CA2	SEC31A	TSPAN9	NASP
ASS1	CLSTN1	PNP	NCKAP1
SERPINC1	HEXIM1	SPTA1	NCL
A2M	SEMA3D	TNNC2	NDRG1
C3	TJP3	CAT	NDUFS1
TIMP1	DIRAS1	ANXA1	NDUFS3
CST3	RPP14	CAPNS1	NHP2L1
CST1;CST4	YIF1A	ALDOB	NIPSNAP1
CSTA	UBR5	YES1	NIT2
NRAS	FSBP	LYN	NME1-NME2
HRAS	PRSS23	MME	NMT1
KRAS	SCAF4	PLEK	NNT
PDGFB	S1PR2	GSTP1	NOLC1
LDLR	NDUFB6	CNP	NOMO1
TGFA	SNUPN	ALDOC	NONO
TGFB1	AKR7A3	TXN	NOP56
HLA-A	UBE4B	PRKAR1A	NOP58
HLA-DRA	ZFPL1	MBL2	NPC2
MB	IKBKAP	RALB	NPEPPS
COL1A1	UBL3	SPTB	NPLOC4
COL2A1	GABARAP	SRC	NPM3
COL3A1	NDUFB4	GP1BB	NQO1
COL4A1	NDUFB8	LCP1	NSDHL
LMNA	NDUFA7	PLS3	NSF
APOA1	VAMP5	GP9	NSFL1C
APOE	RTN3	FABP4	NSUN2
APOC3	LETM1	RAC2	NT5E
FGG	LEPROTL1	IGLL1	NUCB1
MBP	SNX4	SPN	NUDC
FN1	LUC7L3	ANK1	NUDT21
RBP4	KIF20A	EPB42	NUDT5
TFRC	KIF4A	RHOQ	NUMA1
FTH1	SBF1	GGT1	NUP93
MT2A;MT1G	GOSR1	CD247	NUTF2
MT-ATP8	PDE8B	NT5E	OAT
SLPI	LYPD3	S100A4	OGDH
VTN	VAPB	CALML3	OLA1
CAT	SNAPIN	DPP4	OSBP
RAF1	MPZL1	TKT	OTUB1
GBA	NDUFC2	GNA11	OXCT1
FUCA1	NDUFA10	PRDX5	OXSR1
ALDOA	FKBP9	PKLR	P4HA1
CSTB	CELF2	SERPINB1	P4HA2
ANXA1	PGLS	CORO1A	P4HB
APOB	PAPSS2	BSG	PA2G4
NR3C1	ABCB11	MYH11	PABPC1
TFF1	SMC2	TM4SF4	PABPC4
PRNP	ATG7	SERPINB8	PABPN1
SOD2	TRIM16	SERPINB9	PACSIN2
LCAT	LYPLA2	VASP	PAFAH1B1
OAT	IPO7	RAB5C	PAFAH1B2
TK1	TNFAIP8	ARHGDIA	PAFAH1B3
THY1	MAP3K6	CAPZA1	PAICS
TUBB4A	WISP1	CLTCL1	PAK2
GAPDH	PGM3	ARPC4	PALLD
ASL	GCNT3	RAC3	PAPSS2
ERBB2	TNFRSF6B	CDC42	PARK7
CAPNS1	BRI3	DSTN	PARP1
TP53	SVIL	ACTR2	PCBP1
HSPB1	PAPLN	GNG5	PCK2
RPN1	AHSA1	GPLD1	PCMT1
RPN2	SLC34A2	RHOG	PCNA
GNAI2	APOM	PSME1	PCNP
SLC4A2	LCA5L	EPS8	PCYOX1
ATP1A1	ADAMTS2	MMRN1	PCYT1A
ATP1B1	PSMG1	RASA3	PDAP1
ALDOB	LARGE	LASP1	PDCD4
APP	FMNL1	STXBP2	PDCD5
ALDH2	SGPL1	ZYX	PDCD6
ITGB3	CLDN7	TWF2	PDCD6IP
S100A8	ABCA1	CYFIP1	PDE12
HMGN1	SEC24A	MYH14	PDHA1
SERPINB2	SEC24B	ARHGAP18	PDHB
SERPINE1	LPHN2	FAM151A	PDIA3
SLC25A5	NADK	ST8SIA4	PDIA4
CFI	SFT2D2	ARPC1A	PDIA6
ISG15	MPC2	CNN2	PDLIM1
PCCA	ETHE1	KRT12	PDLIM5
PCCB	ACSL3	PARK7	PDLIM7
ALPL	POLR1A	SH3BGRL3	PEA15
ALPP;ALPPL2	STAMBP	RHOJ	PEBP1
EIF2S1	NTN1	GPRC5C	PFAS
HMGN2	DIRAS3	CLEC1B	PFDN1
ICAM1	CDS2	ABRACL	PFDN2
RPLP1	HERC2	CORO1C	PFDN5
RPLP2	RAB3D	TELO2	PFDN6
RPLP0;RPLP0P6	SNAP29	SHANK1	PFKL
SSB	OXSR1	F11R	PFKP
ITGB1	GGPS1	IGHD	PFN1
PRKCB	FGF19	PECAM1	PFN2
KRT18	RAB36	IGHV1024	PGAM1
MYL1;MYL3	HSPA4L	IGHV1002	PGAM5
COL5A2	PTBP3	CASK	PGD
INSR	IL33	IGLV1036	PGK1
LCK	STARD3NL	FCGR3A	PGLS
FYN	LSM8	ITGB2	PGM1
GSN	AP2A1	GTF2IRD2	PGM2
PTMA	DDX58	BIN2	PGM3
CDK1	ZMYM6	RNF39	PHB
ATP5B	STAU1	A2ML1	PHB2
S100A9	TMEM50A	FAM25C	PHGDH
S100A6	SDPR	MAPK12	PHPT1
EIF4E	BAG2	SRI	PICALM
ENO1	BAG3	SSR1	PITPNB
PYGL	MAP4K4	CYCS	PKM
GPI	AIFM1	AKR1B15	PLAA
NPM1	CLDN1	IL36RN	PLCB3
TPM3	CLIC3	EIF4E	PLEC
ITGAV	EML2	RACK1	PLIN3
HEXA	GNA14	HNRNPH1	PLOD1
SERPINE2	ANGPTL1	MYO1B	PLOD2
EPHX1	TSPAN13	CAP2	PLOD3
DBI	TSPAN15	GANAB	PLS3
FABP1	BPNT1	CHIA	PML
LDHB	DDAH2	NPEPPS	PMPCA
CENPB	TXNDC12	IQGAP3	PMPCB
GPX1	OLFM2	NAP1L1	PNP
P4HB	SYF2	HNRNPA1	PNPT1
H1F0	TGM6	NACA	POFUT1
ACYP1	TBX6	RPLP0	POLR2B
CTSD	EFEMP2	PSMA3	PPA1
ANXA2;ANXA2P2	S1PR4	CDSN	PPA2
C8A	RECK	HDLBP	PPIA
C8B	MBD3	P4HB	PPIB
CAPN1	NUDT3	SERPINB4	PPID
TUBB	AGR2	RPS3	PPIL1
IVL	NDUFB10	MACF1	PPL
ADRB2	CLPTM1	HAGH	PPM1G
DCN	MOCS2	DMKN	PPME1
PSAP	TOMM40	CCT8	PPP1CA
HEXB	PEX11B	DDX5	PPP1CB
CTSL	PAK4	PSMB3	PPP1R12A
PFN1	ACTL6A	DCXR	PPP1R2
BPGM	MT-CYB	PPL	PPP1R7
APRT	CYB5A	PDLIM1	PPP2R1A
EPRS	LDHA	MYO1C	PPP2R2A
CTSB	ALDH1A1	SULT2B1	PPP3CA
HSP90AA1	GLUD1	PSMD12	PRDX1
HNRNPC	DHFR	GAPDHS	PRDX2
UQCRH	CYB5R3	IMPA2	PRDX3
LAMB1	GSR	PSMA7	PRDX4
YES1	MT-CO2	XPO1	PRDX5
LYN	PAH	SPTBN2	PRDX6
RET	SOD1	PFAS	PREP
TPM2	CP	MAPK13	PRKAA1
FH	F13A1	EIF3H	PRKACA
THBS1	PNP	DDX3Y	PRKAR1A
IGF1R	HPRT1	TXNL1	PRKAR2A
COL1A2	GOT2	KRT86	PRKCSH
ANXA6	EGFR	AKR1B10	PRKDC
RHOC	PGK1	PRPSAP2	PRMT1
CD55	AK1	KIF5C	PRMT5
SLC3A2	C1R	UGDH	PRPF19
PFKM	HP	HIP1R	PRPF4
HSP90AB1	HPR	GGCT	PRPF6
SRPR	F10	PDCD6	PRPF8
ASNS	CFD	VPS26A	PRPS1
MMP2	PLG	ERN1	PSAP
SOD3	PLAU	LYPLA1	PSAT1
MME	PLAT	CREG1	PSIP1
INHBA	ADA	SERPINB7	PSMA1
MGP	MT-ATP6	CBR3	PSMA2
ITGA2B	CA2	IDH1	PSMA3
PDHA1	ASS1	KRT33A	PSMA4
PLEK	OAS1	KRT34	PSMA5
COL4A2	SERPINC1	ENDOD1	PSMA6
CYC1	SERPINA1	DUSP14	PSMA7
MET	SERPINA3	SCEL	PSMB1
MFI2	A2M	PGLS	PSMB2
SNRNP70	C3	IPO7	PSMB3
ITGA5	C5	PTBP3	PSMB4
VIM	TIMP1	AP2A1	PSMB5
RPS17	CST3	CLIC3	PSMB6
GNAI3	CST4	DDAH2	PSMB7
ANXA5	CST1	LY6G6C	PSMC1
RPSA	CSTA	HPRT1	PSMC2
CD63	NRAS	CST3	PSMC3
MRPL3	HRAS	CSTA	PSMC4
SNRPA;SNRPB2	KRAS	CRYAB	PSMC5
ENO2	LDLR	LMNA	PSMC6
ACAA1	TGFA	GBA	PSMD1
SRP19	TGFB1	HSPB1	PSMD10
GSTP1	CALCA	RPN1	PSMD11
SNRPC	IGF2	RPN2	PSMD12
MMP7	IGJ	ARG1	PSMD13
VIL1	CD4	ALDH2	PSMD14
LGALS1	CD8A	SERPINB2	PSMD2
QDPR	PIGR	SLC25A5	PSMD3
HMGB1	IGKC	EIF2S1	PSMD4
RBP1	IGHG1	RPLP1	PSMD5
FBP1	IGHA1	ATP5F1B	PSMD6
GNAO1	HLA-B	CKM	PSMD7
SPARC	HLA-A	PYGL	PSMD9
TPM1	HLA-H	NPM1	PSME1
CLTA	HLA-DRA	PGK2	PSME2
CLTB	HLA-DRB1	CAPN1	PSME3
ANXA4	HBZ	IVL	PSPC1
INHBB	HBD	EPRS1	PTBP1
CNP	HBE1	VIM	PTGES3
PDGFRB	MB	ANXA5	PTMA
DLD	COL1A1	QDPR	PTPN1
HNRNPA1;HNRNPA1L2	COL2A1	ANXA4	PTPN11
SNRPA1	COL3A1	HMOX1	PTRF
CTSH	COL4A1	H2AZ1	PUF60
COX6C	CRYAB	PLA2G4B	PXN
TACSTD2	LMNA	RO60	PYCR1
PARP1	SPTA1	CTSA	PYGB
POLA1	APOA1	HSPD1	PYGL
IFIT2	APOE	PYGB	QARS
IFIT1	APOC1	PYGM	RAB10
UCHL1	APOC2	LAMP1	RAB11B
LTA4H	APOC3	G6PD	RAB14
ALDOC	FGA	MTHFD1	RAB1A
C4B;C4A	FGB	PABPC1	RAB1B
H2AFV;H2AFZ	FGG	NEFH	RAB21
HIST1H2AJ;HIST1H2AH;HIST1H2AD;HIST1H2AG	MBP	HARS1	RAB2A
FBXO45	GYPA	SLC25A4	RAB35
UBB;UBC;UBA52	FN1	SLC25A6	RAB5C
RAB34	TFRC	IMPDH2	RAB6A
SULT1A4;SULT1A3	LTF	CKB	RAB7A
SRGAP2B	FTL	CKMT1A	RAD23B
HSPA1B;HSPA1A	FTH1	XRCC6	RAD50
U2AF1;U2AF1L4	MT-ND1	LAMP2	RAE1
CBS	MT-ND4	RNH1	RALA
FDX1	MT-ND5	TPT1	RALB
RAP2A	ANG	APEH	RALY
SRGN	MMP1	ANXA8	RAN
TROVE2	C4BPA	MIF	RANBP1
GAA	VTN	FDPS	RANBP2
RRAS	CAT	IDE	RANGAP1
HLA-C	GBA	DARS1	RAP1B
ARAF	FUCA1	JUP	RAP2B
HIST1H1E	ALDOA	UCHL3	RAP2C
DLAT	CSTB	NME1	RARS
PTPRF	ANXA1	RPS2	RBBP4
TXN	APOB	DSP	RBBP7
TGFB3	NR3C1	NQO2	RBM14
COX5B	PRNP	CBR1	RBM25
CTSA	SOD2	GOT1	RBM3
MGST1	LCAT	DES	RBM39
C7	OAT	GM2A	RBM4
PRKAR1A	TK1	LGALS3	RBM8A
CHGA	THY1	TCP1	RBMX
TFPI	CD74	ARF4	RCC1
ESD	CD3D	IL1RN	RCC2
HSPD1	KRT6B	MYL12A	RCN1
CLU	KRT1	TYMP	RDX
HSPA5	S100B	ANXA7	RECQL
LAMC1	VWF	RAB5A	RHOA
PNMT	SEMG1	PSMB1	RHOG
ACP2	TUBB4A	FLG	RNH1
HSPA8	GAPDH	GSTM3	RNPEP
SLC2A1	ASL	ATP6V1B2	RPA1
SLC2A3;SLC2A14	HLA-DPB1	VDAC1	RPA2
EPB41	ERBB2	PCMT1	RPL10
UMPS	WNT1	NME2	RPL10A
PDHB	CAPNS1	TGM1	RPL11
DBT	HSPB1	PPIB	RPL12
PYGB	TYMS	EEF1B2	RPL13
RALA	CYBB	MPST	RPL13A
RALB	RPN1	ATP5F1A	RPL14
BCR	RPN2	PSMA1	RPL15
LAMP1	GNAI2	PSMA2	RPL17-C18orf32
ACADM	SLC4A2	PTBP1	RPL18
TOP1	GYPC	EEF1G	RPL18A
TOP2A	ATP1A1	CALR	RPL19
G6PD	ATP1B1	CANX	RPL21
UBL4A	CHGB	PSMA5	RPL22
PC	APP	PSMB4	RPL23
DMD	ARG1	PSMB6	RPL23A
MTHFD1	APOD	PSMB5	RPL24
IGF2R	ALDH2	S100A2	RPL26
ADH5	ITGB3	CRABP2	RPL27
CDK4	ITGB2	SERPINB3	RPL27A
PRPS2	S100A8	PRDX6	RPL28
PABPC1	SERPINB2	CMPK1	RPL29
PCNA	SERPINE1	PEBP1	RPL3
COX6A1	SLC25A5	PDIA3	RPL30
HARS	CFI	PPP2R1A	RPL31
COL11A1	ISG15	PPP2R1B	RPL32
COL6A1	MPO	S100A7	RPL34
COL6A2	ALPP	CASP14	RPL35A
COL6A3	EIF2S1	STIP1	RPL36
SLC25A4	ICAM1	KIF5B	RPL36A
SLC25A6	RPLP1	PHB	RPL37A
IMPDH2	RPLP2	RPL22	RPL38
TPR	RPLP0	GLRX	RPL4
PIP	SCG5	ATP6V1E1	RPL5
CKB	FABP3	SERPINB5	RPL6
ANXA3	SSB	TALDO1	RPL7
CKMT1A	ATP5G1	ATP6V1A	RPL7A
BMP4	SERPIND1	HSPA9	RPL8
BMP3	ITGB1	EIF4A3	RPL9
BCKDHA	PRKCB	RPL3	RPLP0
ACTN1	KRT18	CAPG	RPLP2
CDH1	COL5A2	CCT6A	RPN1
SRC	CD5	MDH1	RPN2
PEPD	UROD	MDH2	RPRD1B
XRCC6	INSR	PRPH	RPS11
XRCC5	LCK	HAL	RPS12
COX4I1	FYN	PRCP	RPS13
IFITM1	BCHE	PAFAH1B1	RPS14
GP1BB	GLA	USP5	RPS15
LAMP2	GSN	MAPK8	RPS15A
RNH1	RB1	MAPK9	RPS16
BMP1	PTMA	IQGAP1	RPS17
NCAM1	CDK1	CAPZA2	RPS18
VCAN	ATP5B	QARS1	RPS19
ITGA4	S100A9	LGALS7	RPS2
ATP1A3	S100A6	PREP	RPS20
EEF2	EIF4E	ME1	RPS21
PDIA4	CEACAM5	CCT5	RPS23
P4HA1	CKM	CSNK1A1	RPS24
CEACAM1	ENO1	IDH2	RPS25
TPT1	PYGL	ALDH9A1	RPS26
F3	GPI	FASN	RPS27
LCP1	NPM1	CCT3	RPS27A
PLS3	TPM3	SRP9	RPS28
APEH	ITGAV	PSMB2	RPS3
ETFA	LPL	TMED10	RPS3A
GYS1	HEXA	KLK7	RPS4X
PRKAR2A	SERPINE2	DNM2	RPS5
ENO3	EPHX1	CCT4	RPS6
CD59	DBI	RAB7A	RPS7
MTHFD2	LDHB	PLCD1	RPS8
MIF	NEFL	ALDH3A2	RPS9
CD99	NEFM	HSD17B4	RPSA
PRKCSH	GPX1	HNRNPM	RRAS
FDPS	THBD	MVD	RRBP1
TRIM27	PGK2	COPB1	RRM1
CPM	PROS1	SEC24C	RRP9
COX7A2	P4HB	NAPA	RSL1D1
NID1	H1F0	HNRNPH2	RTCB
AKR1A1	ACYP1	EIF6	RTN4
PKM	CTSD	RAB25	RUVBL1
HSP90B1	ANXA2	RAB2A	RUVBL2
CCNB1	C8B	RAB5B	S
MYL6B	CAPN1	UBE2D3	S100A10
SNRPN;SNRPB	TUBB	NUTF2	S100A11
IDE	PRSS2	HNRNPK	S100A13
COX6B1	ADRB2	RPS8	S100A16
HNRNPL	DCN	RPS15A	S100A2
DARS	PSAP	RPS11	S100A4
JUP	HEXB	SNRPD3	S100A6
UQCRB	CTSL	ARF6	SAE1
GLUL	PFN1	RAB11A	SAFB
AKR1B1	BPGM	RPS4X	SAR1A
ANPEP	APRT	H4016	SARNP
PVR	CD3E	RAN	SARS
RAC2	EPRS	RPL23	SART3
GSPT1	CTSB	RPL11	SBDS
IFNGR1	HSP90AA1	PPP2R2A	SCAMP3
B4GALT1	HNRNPC	DYNLL1	SCFD1
EZR	UQCRH	KRT83	SCP2
FOLR1	LAMB1	KRT85	SCRN1
UCHL3	YES1	GSTO1	SDCBP
AREG	LYN	DCD	SDF4
CD46	TPM2	ARF5	SDHA
NME1	FH	ERH	SDHB
NQO1	SFTPB	SRSF3	SEC13
GNS	THBS1	PFKP	SEC22B
VEGFA	GJB1	DSG1	SEC23A
PHKG2	IGF1R	DSC2	SEC23B
RPS2	COL1A2	NUCB1	SEC24C
DSP	ANXA6	RPL6	SEC31A
RPA2	RHOC	GLO1	SEPTIN11
MUC1	NGFR	PRDX1	SEPTIN2
COX7C	CD55	C1QBP	SEPTIN7
TIMP2	ABCB1	CKAP4	SEPTIN9
CD44	SERPINA6	TGM3	SERBP1
NQO2	SLC3A2	DHX9	SERPINB1
H2AFX	GUSB	GOLGA3	SERPINB5
ACAN	PFKM	DSC1	SERPINB6
ITGB4	HSP90AB1	AHNAK	SERPINH1
CBR1	SRPR	AP1B1	SET
GLB1	ASNS	KIF5A	SF1
NCK1	ELANE	MTAP	SF3A1
HIST1H1B	SYP	PRDX4	SF3A2
HIST1H1D	MMP2	CAMK2D	SF3A3
HIST1H1C	GSTA2	SPTAN1	SF3B1
EPCAM	SOD3	PKP1	SF3B2
POR	CTSG	BLMH	SF3B3
DPEP1	HMBS	PTK6	SF3B5
PRLR	MME	TRIM29	SFN
ATP2A2	INHBA	TTLL12	SFPQ
CPE	MGP	DYNC1H1	SFXN1
FAH	PDHA1	EIF4A2	SGTA
STMN1	PLEK	DSC3	SH3BGRL3
YBX3	CD14	PLS1	SHMT2
HSPA6;HSPA7	COL4A2	KPNB1	SKIV2L2
HMGA1	CYC1	PLEC	SKP1
GOT1	PTPRC	PPA1	SLC16A1
ITGA2	SNRPB2	PCBP1	SLC1A5
GJA1	MET	MAPRE2	SLC25A11
SMPD1	MFI2	MAPRE1	SLC25A24
UBTF	MYL3	MYLK	SLC25A3
PRKACA;PRKACB	CFH	MLF2	SLC25A5
CAPN2	SNRNP70	CST6	SLC25A6
GAP43	HCK	RAB11B	SLC3A2
HLA-G	ITGA5	CSRP2	SLC7A5
CTPS1	VIM	MAPK14	SLC9A3R1
ENG	RPS17	FSCN1	SLIRP
DDX5	KRT19	LGALSL	SMARCA5
PFKL	GNAI3	ASPRV1	SMARCC2
LGALS3	ANXA5	HSP90AB4P	SMC1A
IGFBP3	RPSA	HSP90AA4P	SMC2
PSMC3	IL6R	FLG2	SMC3
TCP1	ADRA2A	SARS1	SMC4
PTPN1	ROS1	KPRP	SMS
BMP7	CD63	SURF4	SNAP23
RPL35A	SNRPA	YOD1	SND1
ITGB5	FGF2	PPP2R2D	SNRNP200
ARF4	ENO2	PLBD1	SNRNP40
RPL7	ACAA1	MOXD1	SNRNP70
VCL	SRP19	SBSN	SNRPA1
PTPRA	GSTP1	RPTN	SNRPB
NAT1	SNRPC	NAPRT	SNRPD1
ITGB6	MMP7	CD109	SNRPD2
SON	VIL1	LDHAL6A	SNRPD3
RPL17	CXCL1	ACP7	SNX1
PGAM1;PGAM2	LGALS1	NCCRP1	SNX3
RCC1	QDPR	H3C13	SNX6
SDC1	HMGB1	H2AZ2	SNX9
LIG1	RBP1	EIF3M	SOD1
ATP5J	FBP1	GDPD3	SORD
XRCC1	GNAO1	TFAP2D	SPAG9
CDH2	SPARC	S100A7A	SPATS2L
TSPAN8	GSTM1	NLRP10	SPR
PLCG1	TPM1	PLA2G4D	SPTBN1
UGT1A6;UGT1A9;UGT1A1;UGT1A5;UGT1A3;UGT1A4	CLTA	HRNR	SQRDL
CD58	CLTB	SERPINA12	SQSTM1
NCL	ANXA4	KRT78	SRI
HK1	INHBB	SDR16C5	SRM
POLR2C	CNP	SDR9C7	SRP14
POLR2E	CD7	HM13	SRP68
NDUFV2	HMOX1	EPS8L1	SRP72
TNFRSF1A	CSF1	RPS21	SRP9
GGT1	PDGFRB	STAG1	SRRM2
EIF2AK2	DLD	POF1B	SRRT
SRM	HNRNPA1	DDX1	SRSF1
SLC9A1	SNRPA1	GCN1	SRSF11
CSNK2A2	CTSH	EVPL	SRSF2
AOC1	COX6C	GGH	SRSF3
ITIH1	TACSTD2	MYDGF	SRSF6
NFKB1	C1S	LRRC59	SRSF7
FST	PARP1	ARL8A	SRSF9
TYMP	IFIT2	DYNLL2	SSB
ATP2B1	IFIT1	OTUB1	SSR4
EIF2S2	UCHL1	PGM2	SSRP1
ANXA7	LTA4H	PDLIM5	ST13
BTF3	ALDOC	CNDP2	STAT1
RAB3A	C4B	SERPINB12	STAT3
RAB4A	H2AFV	GSDMA	STAU1
RAB5A	HIST1H2AH	PSMB7	STIP1
RAB6A;RAB6B	RHOXF2	S100A13	STMN1
PSMB1	UQCRFS1P1	PHB2	STOM
M6PR	JMJD7	CCT7	STOML2
COX5A	MYZAP	TREX2	STRAP
LMNB1	UBTFL1	PRXL2A	STT3A
OGN	IGLC3	ERP44	STUB1
CAST	GSTT2B	TMEM43	STXBP3
IMPDH1	UBB	BDH2	SUB1
COL5A1	LIMS3L	TMED9	SUCLG1
RASA1	TRAPPC2B	ELOVL1	SUCLG2
PTMS	RAB34	KRT23	SUMO1
GSTM3	SAA1	PITHD1	SUMO2
ATP6V1B2;ATP6V1B1	SAA2	SDCBP2	SUPT16H
ATP6V1C1	SULT1A4	RNASE7	SUPT5H
CSRP1	CT45A2	MYLK2	SYNCRIP
FLNA	HSPA1B	TAOK3	TACSTD2
NF1	SMIM10	UNC45A	TAGLN
MAOA	U2AF1	NIT2	TAGLN2
ACO1	CBS	PHPT1	TALDO1
SYT1	CALCB	OLA1	TARDBP
KITLG	RAP2A	ARL8B	TARS
NT5E	SRGN	DPP3	TBCA
EPHA1	GZMB	IL36G	TBCB
MDK	CXCL8	CALML5	TCEB1
VDAC1	TROVE2	LARS1	TCEB2
BGN	GAA	TJP2	TCP1
ERBB3	RRAS	SWAP70	TECR
SDHB	HLA-C	CPA4	TES
CD9	BCL2	SERPINB13	TFAM
BCKDHB	SPP1	NAGK	TFRC
COMT	DLAT	NUDT5	TGFBI
TGM2	PTPRF	RAB21	TGM2
MUT	TXN	PYCARD	THBS1
OSBP	TGFB3	PA2G4	THRAP3
PCMT1	COX5B	VDAC3	TIMM44
FBL	CTSA	RTCB	TIMM50
GART	MGST1	NEU2	TIPRL
TNXB	PRKAR1A	PKP3	TKT
CDH3	CHGA	CRYBG1	TLN1
PAICS	TFPI	HEBP2	TMED10
SCP2	ALPPL2	RPS24	TMED2
UBA1	KIT	RPL13A	TMED7
GPX3;GPX6;GPX5	CD28	RPSA	TMED9
NME2	ESD	NT5C3A	TMOD3
ENPP1	HSPD1	VDAC2	TMPO
FGFR4;FGFR3	CLU	KRT81	TMSB4X
KCNA5	HAPLN1	TGM5	TNKS1BP1
SPRR2A;SPRR2B;SPRR2D;SPRR2E;SPRR2G	MYL2	ABI1	TNPO1
FDXR	HSPA5	MYO6	TOMM34
HNRNPA2B1	LAMC1	DDX3X	TOMM70A
RFX1	CD37	ANXA8L1	TOP1
CALB2	ACP2	EPPK1	TOP2A
UQCRC2	HSPA8	REXO2	TOR1AIP1
TGM1	SLC2A1	IGKV6D021	TP53BP1
CA4	SLC2A3	DDX17	TPD52L2
FECH	EPB41	PHGDH	TPI1
CES1	UMPS	RPS14	TPM4
FBLN1	PDHB	CTSD	TPP1
TCEA1	DBT	HARS2	TPR
ITGA6	ITGAM	CTNNB1	TPT1
SFPQ	PYGB	ASAH1	TRA2B
TUBG1;TUBG2	PYGM	MAPK10	TRAP1
PPIB	RALA	IGLV6057	TRIM25
S100A1	RALB	EPN2	TRIM28
KAL1	NAT2	KLK5	TRIP10
ME2	BCR	KRT87P	TROVE2
WARS	SPTB	LTBP1	TSG101
RPS3	LAMP1	SMIM1	TSN
GCSH	ACADM	FCN1	TSTA3
RPS6KB1	TOP1	HLA0H	TTC1
JAK1	TOP2A	BTD	TTLL12
PTPRE	G6PD	PLTP	TUBA1A
PTPRG	UBL4A	HLA0E	TUBA1C
TNFSF4	PC	PASD1	TUBA4A
AHCY	DMD	PNPLA8	TUBB
HIST1H2BO;HIST1H2BB	MTHFD1	EMILIN1	TUBB2B
CFL1	EPX	GATD3B	TUBB3
EIF4B	IGF2R	IGKJ3	TUBB4B
F8A1	ADH5	IGKV1D016	TUBB6
ATP2B4	CDK4	IGLV9049	TUFM
DGKA	PRPS2	IGLV2018	TWF1
CPT2	PABPC1	MVK	TWF2
DTYMK	PCNA	HLA0DRB1	TXN
RRM1	KRT3	CCS	TXNDC12
LAMA2	HARS	TGFB1I1	TXNDC17
EEF1B2	COL11A1	NCAM1	TXNDC5
ATP5F1	COL6A1	C5AR1	TXNL1
IGFBP5	COL6A2	CALD1	U2AF1
ACP1	COL6A3	C18orf63	U2AF2
ACAT1	SLC25A4	TAGLN3	U2SURP
TNC	SLC25A6	IGFBP3	UAP1
MYL9	F5	FCGR3B	UBA1
POLR2A	IMPDH2	IGKV1037	UBA2
CDK2	TPR	IGKJ1	UBA6
ADRBK1	RLBP1	ANO7	UBAP2L
ACKR3	PTHLH	TBC1D30	UBE2L3
F2R	PIP	DXO	UBE2M
MCM3	CKB	AP2A2	UBE2N
MPST	FCGR2A	SERPINA5	UBE2V1
LAMA1	ANXA3	MST1	UBR4
RPS12	CKMT1A	TGM4	UCHL3
FAS	BMP2	CAMP	UGDH
YY1	BMP4	FGL1	UGGT1
DNAJB1	SKIL	IGKJ5	UGP2
DNAJB2	ACTN1	IGHJ2	UPF1
ATP5A1	ACE	SPP2	UQCRC1
CTSS	MYL4	VPS13D	UQCRC2
PSMA1	CDH1	H303B	UQCRH
PSMA2	SRC	ABCB11	USO1
PSMA3	PEPD	ADH1B	USP10
PSMA4	XRCC6	ALDH1A1	USP14
S100P	XRCC5	GLUD1	USP5
ITGA3	COX4I1	GSR	USP7
ITGB8	IFITM1	ASL	VAMP3
PTX3	GP1BB	SERPINE1	VAPA
MSN	IFI30	ALPL	VAPB
PTPN3	LAMP2	CEACAM1	VARS
DDX6	RNH1	PROZ	VASP
CTNNA2	BMP1	CES1	VAT1
DNMT1	CYBA	GLUD2	VBP1
U2AF2	CCL5	MARS1	VCL
RPL13	SCG2	INHBE	VCP
CHML	NCAM1	HSPE1	VDAC1
IVD	ICAM2	H3C1	VDAC2
S100A4	VCAN	ENPEP	VDAC3
MGAT1	ITGA4	AKAP6	VIM
HMGB2	ATP1A3	TGFBI	VPS26A
PTBP1	EEF2	H304	VPS29
TARS	KRT13	UGP2	VPS35
VARS	PDIA4	ADGRG6	VPS4B
EEF1G	C6	BPIFB1	VTA1
FKBP2	P4HA1	BAIAP2L1	WARS
MST1	ACP5	HSPE10MOB4	WDR1
STOM	CEACAM1	IGKV6021	XPNPEP1
AK4	TPT1	PCK2	XPO1
ANXA13	ALAD	ESPN	XRCC5
YWHAQ	OSM	CD55	XRCC6
MAPK3	F3	TMEM201	XRN2
MARK3	PRG2	SNAP23	YARS
DPP4	HLA-E	CAPN5	YBX1
RPL10	HLA-DRB4	PROM1	YBX3
RPA1	LCP1	EPB41L2	YKT6
APEX1	PLS3	XPNPEP2	YTHDF2
CD82	APEH	ADH1C	YWHAB
DCK	ETFA	ADA	YWHAE
CAD	GYS1	NRAS	YWHAG
CALR	PRKAR2A	HRAS	YWHAH
MAP4	SLC5A1	KRAS	YWHAQ
CANX	ANXA8	PCCA	YWHAZ
PIK3R1	ENO3	PCCB	ZC3HAV1
PSMB8	CD59	FABP1	ZNF185
PSMB9	MTHFD2	ADH1A	ZYX
PSMA5	GFAP	ABCB1
PSMB4	MIF	ADH4
PSMB6	CD99	RAP2A
PSMB5	PRF1	H104
ABCD3	PRKCSH	EPB41
SSFA2	HCLS1	CPM
LOX	FDPS	H103
NDUFS1	CPM	H102
MAPK1	COX7A2	TSPAN8
GCA	SI	CD58
GRN	NID1	ATP4A
PTPRM	AKR1A1	ABCB4
LAP3	PLA2G2A	TPP2
S100A2	PKM	ACSL1
PCSK6	ACYP2	CTNNA1
TPP2	HSP90B1	PSMB10
IMPA1	CCNB1	ITGA1
CTGF	MYL6B	RAP2B
EPHA2	SNRPB	RHOB
EPHB2	IDE	H101
PTPN6	COX6B1	PTPRJ
SHC1	HNRNPL	PRSS8
MPG	DARS	CYBRD1
CRABP2	JUP	PDZK1
COL4A5	UQCRB	SNX32
TKT	AKR1B1	SLC22A9
PML	ANPEP	GPT2
EEF1D	PVR	SNX18
MARCKS	RAC2	ZBTB18
GNA11	GSPT1	NSD3
ALDH4A1	IFNGR1	ABCG8
ERP29	ARSA	EHD4
PRDX6	B4GALT1	AHSP
C21orf33	ACPP	CEMIP2
BLVRB	EZR	PACSIN2
PRDX5	ATP6V1B1	TFR2
DDT;DDTL	FOLR1	EPB41L3
PRDX3	UCHL3	RAP2C
ATP5D	KCNE1	NPC1L1
RPL12	HPGD	CAD
ECHS1	VAV1	GCA
CMPK1	CSF2RA	PSMC5
PEBP1	AREG	WBP2
PDIA3	CD46	CPNE3
PPP2R1A	NME1	SEMA7A
CDC27	NQO1	RP2
PPIF	GNS	FLOT1
NMT1	RPS2	GYPC
HLA-B	ST6GAL1	TGM2
HMOX2	DSP	DDT
ADSS	RPA2	PSMC2
AXL	MUC1	ANXA11
LRPAP1	COX7C	PSMD7
OXTR	TIMP2	RAD23A
ADSL	NPR1	RAD23B
CLIP1	CD44	GP2
SRI	NQO2	GNG2
GNA15	H2AFX	PRPS1
SERPINB1	SELP	PSMC1
SLC7A1	ACAN	PSMC6
ALDH1B1	ITGB4	CCT2
POLR2B	SPN	MPP1
NTSR1	CBR1	ANK3
SDHA	ANK1	SELENBP1
CORO1A	ACADS	DCTN2
GDI1	PDGFRA	FLOT2
S100A7;S100A7A	GLB1	PSMD6
MAT2A	PECAM1	TET1
CPS1	NCK1	CCT6B
SDC4	HIST1H1B	PSMD1
FMO3	HIST1H1C	CPNE1
DNAJA1	EPCAM	GLIPR2
AKT1	POR	MSL2
AKT2	DPEP1	RUVBL2
UQCRC1	MGMT	PSMC3
HIBADH	PCSK2	EPB41L1
ATIC	ATP2A2	FAP
HNRNPH3	CD36	GYPA
HNRNPH1	CPE	ANK2
CASP14	IL7R	SHPRH
YWHAB	PLCG2	ENPP3
SFN	FAH	SOD1
STIP1	STMN1	DBI
S100A11	YBX3	RPS17
L1CAM	ZNF19	RALA
PRDX2	NAGA	GRB2
ARRB2	HSPA6	BST2
CDA	RHOQ	SLC9A3R2
DCTD	HMGA1	ELAVL1
PYCR1	TMEM11	TGIF2LX
GBP1	GOT1	ULK2
GBP2	BPI	ABCC2
HPD	PRKCA	PACSIN3
STX2	JUNB	SARDH
DSG3	ITGA2	SHANK2
RPL9	GJA1	WASF2
CD70	NPR3	HLA0DRA
ACSL1	UBTF	C2CD2L
KIF5B	NDUFB7	ENDOV
CSTF2;CSTF2T	PRKACA	LTN1
DUT	TYRP1	LCA5L
ABCC1	CAPN2	IGLV5037
CKS2	DES	ARFGAP2
ABCD1	GAP43	SNRPB2
MAN1A1	HLA-G	IGLV403
TTK	PTPN2	ITLN1
MCM4	CTPS1	ITLN2
MCM5	ENG	PSMB9
MCM7	DDX5	STK24
RNASE4	PFKL	ATP6V1B1
SDC2	GM2A	HNRNPAB
SHMT1	LGALS3	HNRNPD
SHMT2	IGFBP3	ANXA3
EVI2B	FLT1	ANXA6
HSPA1L	PSMC3	FGFR1
HSPA4	TCP1	SH3TC2
MPI	PTPN1	CDK17
GPC1	ALOX12	FGFR3
PFN2	IGFBP2	HCK
CTNNA1	BMP7	APMAP
CTNNB1	RPL35A	PLCL1
PHB	ITGB5	ESD
SERPINB6	ARF4	SMG1
NF2	RPL7	CDK12
RDX	VCL	MYO1F
RPA3	GPX2	STK25
RFC4	LBP	PPP6C
RFC2	PTPRA	PDXK
RFC1	ITGB6	TPP1
RPL22	SON	MYL12B
SPR	RPL17	GMFG
ADM	PGAM1	MACROH2A1
HRH1	RCC1	PGLYRP1
THBS2	SDC1	CDK14
THBS4	LIG1	ANG
FBN1	ATP5J	MPO
AGL	PAM	RPLP2
MYH9	CDH2	MYL1
MYH10	TSPAN8	LCK
TIE1	GNAZ	FYN
COPB2	GNAT2	CDK1
SOAT1	MYL12A	DCN
ADD1	PLCG1	CTSL
BSG	UGT1A6	APRT
TIMP3	CD58	ELANE
FUS	VCAM1	MYL3
NUP214	NCL	LGALS1
DEK	HK1	FGR
GLRX	POLR2C	SPP1
PPM1A	POLR2E	MYH3
IGFALS	CD53	ITGAM
HMGCL	NDUFV2	TOP1
PSMC2	TNFRSF1A	EPX
SLC16A2	GGT1	CDK4
GGT5	TRIM21	COL6A2
ARL2	TFEB	RNASE3
ARL3	EIF2AK2	MYH1
TRIM23	EN2	MYH7
MAP2K2	SRM	XRCC5
ATP5C1	SLC9A1	MYH6
ATP6V1E1	CSNK2A2	ALAD
CPOX	ITIH2	GYS1
RPL4	FST	MMP9
NUDT1	TYMP	H105
LONP1	ATP2B1	BPI
PGM1	EIF2S2	PFKL
PPP1CC	ANXA7	NCL
BMPR1A	CD33	HK1
TGFBR1	AZU1	NCF2
GNL1	BTF3	AZU1
LTBR	RAB3A	BGN
SERPINB5	RAB3B	FGFR4
DLST	RAB4A	AMPD1
GPX4	RAB5A	WARS1
SRP14	RAB6A	ACP1
TGFBR2	PVALB	MYL9
NUP62	MSH3	CDK2
HPCAL1;HPCA	MX1	S100P
FDFT1	MX2	HMGB2
TAGLN2	NPR2	PSMB8
TALDO1	PSMB1	LAP3
ETFB	M6PR	PTPN6
RBMX	ATP4A	ERP29
ATP6V1A	COX5A	ADSS2
HSPA9	LMNB1	CASQ1
EIF4A3	ITGAL	ATIC
RPS19	PZP	CDA
RPL3	EDN2	RNASE4
COL15A1	CAST	PPP1CC
COL18A1	IMPDH1	MNDA
DDOST	COL9A1	ACTR1B
ANP32A	COL5A1	NAMPT
FEN1	NEB	PSMC4
CUX1	AGA	GYG1
CAPG	RASA1	CDK9
CAP2	PTMS	HK2
IL6ST	CDK11A	HK3
CEACAM6	FUT3	COPA
TXLNA	PTN	SUB1
CCT6A	GSTM3	GYS2
NNMT	ATP6V1B2	CSE1L
PSMB10	ATP6V1C1	MTPN
RPL13A	CSRP1	ACTR1A
ARL1	FLNA	RPL15
STAT3	NF1	PPP1CA
USP8	ACO1	PPP1CB
PEX19	S1PR1	RPL7A
MDH1	SYT1	LCN2
MDH2	NT5E	S100A12
RFC5	GPD1	CDK6
RFC3	MDK	CDK5
HADHA	VDAC1	HNRNPU
EIF2S3;EIF2S3L	BGN	AMPD3
CETN2	ERBB3	CLC
EIF2D	SDHB	CDK18
WNT5A	CD9	MYO1E
BUD31	COMT	RAB31
NAA10	TGM2	MVP
P2RY2	BMP6	IGFBP7
PPP1R2P3;PPP1R2	OSBP	HKDC1
CSK	PCMT1	TIMP1
GARS	FBL	HMGB1
IARS	RPS4Y1	OLFML2B
SLC19A1	GART	H2BC19P
EIF1;EIF1B	TNXB	OLFM4
TSPAN7	CDH3	STK26
PRKCI	PAICS	OSTF1
ACTR1B	SCP2	DOCK10
ECI1	UBA1	VAT1
TMPO	GPX3	ANP32E
STAT1	NME2	MACROH2A2
SKIV2L2	ENPP1	VPS29
AKR1C3	GAL	DBNL
PIK3CB	FDXR	MYH2
MTOR	PRKACG	MYH13
PI4KA	HNRNPA2B1	PADI3
EPS15	CALB2	PADI4
CASP3	IGFBP4	CILK1
RPS27	PRKACB	MYH15
RBM34	UQCRC2	SAMHD1
LRPPRC	SLC2A5	MYH4
ACAA2	FECH	HNRNPC
RPL35	CES1	HNRNPDL
CDKN2A	FBLN1	FGFR2
PRCP	TCEA1	PRTN3
HTT	PTGS1	CDK13
ECE1	ITGA6	NCF1
SLC1A3	SFPQ	H302
SLC1A4	TUBG1	MYL2
PAFAH1B1	PPIB	RPS3A
MCAM	S100A1	CSRP1
CRAT	ME2	MYBPC1
MATR3	GLDC	ANAPC5
MSH2	WARS	MYL4
GRK6	RPS3	SRSF2
GPD2	GCSH	PSMD14
SSR1	RPS6KB1	BANF1
SSR2	JAK1	SKAP2
SYK	PTPRB	STK10
RANBP1	PTPRD	CYBB
NAMPT	PTPRE	HMGN2
PSMC4	PTPRG	SSB
TSFM	PTPRZ1	H100
PPIC	AHCY	CTSB
VDAC2	CFL1	RNASE1
ACADSB	EIF4B	ALOX5
CBX5	F8A1	UQCRC2
USP5	ATP2B4	CTSS
MKI67	DGKA	RPL13
PHKA2	CPT2	ICAM3
PHKA1	DTYMK	ADD1
SLC15A1	RRM1	DEK
RANGAP1	LAMA2	RPL5
RECQL	FCAR	CRIP1
NOP2	PRTN3	CSRP3
ATRX	MMP11	MFAP4
CRK	KDELR1	CCL18
CRKL	EDNRB	RPL23A
BAG6	EEF1B2	RPS6
NSF	ATP5F1	ACACA
NOTCH1	TBXAS1	PAK2
MAP2K3	IGFBP6	CBX3
BRCC3	IGFBP5	SRSF7
RPL27A	ACP1	LRRFIP1
RPL5	ACAT1	FHL1
RPL21	TNC	UNC13D
RPL28	MYL9	SRRM1
RPS9	POLR2A	H1010
RPS5	CDK2	ARHGEF2
RPS10;RPS10P5	APC	MYLPF
MAP1B	ADRBK1	MYCBP
GNPDA1	ADRA1D	NUCKS1
NEDD4	ACKR3	LRRFIP2
UTRN	F2R	SOD2
IQGAP1	MPZ	TNNI2
GYG1	MCM3	TNNI1
STT3A	AZGP1	CRTAC1
RABIF	MPST	TNNT3
PLA2G4A	LAMA1	MPIG6B
RAP1GAP	RPS12	PLXND1
CAPZA2	FAS	DGLUCY
CAPZB	DNAJB1	LTBP3
EIF1AX;EIF1AY	ATP5A1	TBC1D8B
ALDH1A3	CTSS	PRMT5
QARS	PSMA1	FYB1
RPL29	PSMA2	STX11
UQCRFS1;UQCRFS1P1	PSMA3	PDE5A
SLC6A8	PSMA4	PROC
ATP5O	S100P	MGP
LIMS1	NPY1R	CD14
GLIPR1	COL5A3	DBH
CXCL12	CD40	CLTA
SLC6A11	ITGA3	CLTB
SLC6A9	ITGB7	THEGL
PREP	ITGB8	SLC2A3
ME1	PTX3	CETP
TFPI2	MSN	FCER1G
PIP4K2A	DDX6	SFTPD
ARCN1	CTNNA2	TGFB2
LSS	DNMT1	GNG11
GCLC	U2AF2	SPTBN1
GCLM	RPL13	DMTN
CD151	S100A4	INF2
PSMD8	MGAT1	TRIM71
PRRC2A	HMGB2	CROCC
GSS	PTBP1	NRGN
CCT5	TARS	TFG
HSPA13	VARS	CD180
CSNK1A1	EEF1G	WDR77
CSNK1D	FKBP2	GGACT
IDH2	STOM	GP6
PITPNB	AK4	EHD2
CD97	ANXA13	TGFB1
MARCKSL1	YWHAQ	SPTBN4
PXN	MAPK3	SELP
DNASE1L1	MARK3	CD151
ALDH9A1	ATP6V0C	TNXB
RPL34	CALML3	ITGA2
LMAN1	DPP4	HLA0F
NASP	RPL10	CD226
FASN	COL8A1	LGALS9
FNTA	RPA1	ATP2A1
CCT3	APEX1	PDGFB
ARRB1	CD82	SLPI
TUFM	DCK	CDH1
ALDH7A1	CAD	NID1
INPP1	CALR	HLA0G
CYB561	MAP4	TIMP3
CENPF	CANX	NDST1
SRP9	PIK3R1	ARFIP1
PCYT1A	PSMB8	CLINT1
AARS	PSMB9	ATP2A3
CARS	PSMA5	CHMP4A
HARS2	PSMB4	NCKAP5
SARS	PSMB6	IGKJ4
MAN2A2	PSMB5	PLA2G2A
CASP4	GSTM2	ST6GAL1
CSNK1E	ABCD3	PTPRB
CTCF	LOX	CXCL12
PSMB3	NDUFS1	PTTG1IP
PSMB2	ADH6	TMSB10
MCM2	POLD1	NAP1L4
COMP	SMARCA1	CD37
ACADVL	MAPK1	ATP5MF0PTCD1
YLPM1	GCA	KCTD12
TMED10	GRN	GTF3C3
RBM25	PTPRM	TRPM8
NUMB	LAP3	KMT2C
PSEN1	CD38	HEG1
EIF2B2	CD1B	GALC
HINT1	CD1C	HEATR5A
RARRES1	GJB2	GNPTG
NUP153	S100A2	IGLV10054
RANBP2	GTF2E2	IGHV1045
RGS19	PCSK1	CDH26
RGS3	PCSK6	STC2
NDUFV1	TPP2	IGKV1OR20108
GSK3A	IMPA1	EDDM13
GSK3B	CTGF	LRBA
TAF6	EPHA2	LCAT
SULT1E1	EPHA3	SELL
NT5C2	EPHA8	ZNF182
GMPS	EPHB2	MUCL1
MRE11A	PTPN6	CST4
GNAQ	SHC1	CST1
GNG10	MPG	CCL5
IDH3A	CRABP2	CNTRL
SULT1A1;SULT1A2	COL4A5	NAV2
CRIP1	TKT	PGBD5
MMP14	CASP1	IGHE
GDI2	SERPINB3	SULF2
EMD	LMOD1	GSTA1
CPT1A	PML	GSTA2
SLC26A2	TYK2	PAICS
SERPINH1	EEF1D	MED27
ST13;ST13P4;ST13P5	OAS2	TNN
VASP	CRABP1	ANGPTL3
DNM2	CD40LG	CLCA1
METAP2	MARCKS	PRPSAP1
KNTC1	GNA11	CTNND1
LRBA	ALDH4A1	DKC1
BCAM	PBLD	DNAJA2
PPT1	ERP29	GFPT2
RPL14	PRDX6	GSTM1
CCT8	C21orf33	RRAS
CCT4	BLVRB	ADH5
ATP1A2	PRDX5	CAPN2
ANXA11	DDT	COPB2
FXR1	GCHFR	LGALS4
FXR2	PRDX3	PPP2CB
RAB5C	ATP5D	PPP2CA
RAB7A	RPL12	GFPT1
RAB9A	ECHS1	TARDBP
RAB13	CMPK1	AIMP2
PDE6C	PEBP1	DPYSL3
PLCD1	PDIA3	TST
DAP3	PPP2R1A	AOC3
DUSP3	PPP2R1B	NUDT16
SMARCA4;SMARCA2	CD6	GPA33
IDH3G	CDC27	PDLIM7
GALK1	FCER1G	GRHPR
SSR4	CCND2	AKR1C3
BCAP31	WEE1	DPYSL2
TPMT	PPIF	PRMT1
MECP2	TM4SF1	LMF1
HCFC1	NMT1	IPO5
IRAK1	HLA-F	COPE
CAV2	HMOX2	USO1
ALDH3A2	ADSS	B4GALT2
ALDH5A1	AXL	PMPCB
GPC3	LRPAP1	SF3B1
HSD17B4	TSPO	ALDH1A2
PSMD7	GRPR	PRPS2
GPM6A	OXTR	NQO1
STAT5B;STAT5A	ADSL	ALDH1B1
CLCN7	PKLR	IARS1
PLXNA3	CLIP1	RPS9
DYNLT3	SRI	ALDH1A3
VAMP7	GNA15	RPS26
RPS6KA3	GSTT1	PMPCA
AKR1D1	SERPINB1	SF3B3
HDGF	SLC7A1	FAM98B
NEK2	ALDH1B1	SND1
NDUFA8	ALDH3A1	BZW1
HNRNPA3	POLR2B	ARHGEF1
PGD	NTSR1	EML4
HNRNPM	NTS	NANS
KPNA2	LCN1P1	EIF2B3
KPNA1	SDHA	FARSB
RAP1GDS1	CORO1A	PARP4
POLR2H	GDI1	RUVBL1
ARHGDIA	S100A7	RPL17
ARHGDIB	MAT2A	EIF5B
SLC7A2	PRKAR1B	MAP2K7
AGFG1	PRKAR2B	SP100
HNRNPF	CPS1	GRN
GTF2A1	RRM2	CSNK1G2
MSH6	SDC4	C16orf54
KIF11	SLC6A6	INPP5D
VAV2	DNAJA1	CSNK1G1
HRSP12	AKT1	CCL27
SMS	AKT2	CSNK1G3
HK2	UQCRC1	CD72
EFNB2	HIBADH	MYCT1
EFNA5	ATIC	ANGPT1
MRPL12	HNRNPH3	FAM186B
NDST1	HNRNPH1	COG4
THOP1	CASP14	EMC2
AKR1C2	YWHAB	CPS1
CAPZA1	SFN	GSTA3
HMGA2	STIP1	HSD17B13
CRIP2	S100A11	EXTL2
NUP98	CEACAM8	FBN1
BLVRA	L1CAM	CDH5
SLC25A1	PRDX2	PM20D1
PPP5C	CCR1	KCNN2
PLK1	GPR183	AQP1
ARFIP2	CDA	AASDH
ARFIP1	DCTD	AFTPH
ACLY	PYCR1	PIP
METAP1	SLC8A1	DDX55
SUCLG1	GBP1	PTCHD4
MVD	GBP2	SAMD11
COPB1	STX2	RGS20
COPA	CTH	UFSP2
CLTCL1	ICAM3	BCAM
AP2S1	RPL9	CHMP4C
HCCS	CD70	AKAP9
ITGA8	ACSL1	CHMP4B
PTTG1IP	KIF5B	TMED7
PLA2G16	CSTF2	IRAG1
SLC16A1	LSP1	ZNF316
IST1	DUT	NME3
SEC24C	ABCC1	LIMCH1
SUB1	ABCD1	KIF15
CLNS1A	MAN1A1	UNC5B
RARS	TTK	TTYH3
ATXN3	MCM4	SCN9A
HAP1	MCM5	PTPRA
CACNA2D1	MCM7	MCF2L2
YARS	GALNS	IGLV5048
USP14	RNASE4	SLMAP
PRKAG1	SDC2	FGD6
HSPA2	SHMT1	DDX46
BCAT1	SHMT2	MUC7
ATP1B3	EVI2B	APP
RAD23A	HSPA1L	SCGB2A1
RAD23B	HSPA4	PRSS1
EPHB3	GRK5	TCN1
EPHB4	MPI	LCN1
EPHA4	PRSS3	PRR4
AK2	GPC1	LEG1
GAS1	PFN2	BPIFB2
ALDH18A1	CTNNA1	OPRPN
NAPA	CTNNB1	LACRT
MFAP2	PHB	ZG16B
EIF5	SERPINB6	PRSS2
SLC12A2	NF2	NUCB2
PSMD4	RDX	PLA2G7
CSE1L	RPA3	PHF7
VCP	RFC4	PLAT
MFAP3	RFC2	MUC5B
MFAP4	RPL22	FAM217B
HADHB	GTF2F1	MUC5AC
F2RL1	SPR	CNOT11
MANF	THBS2	REV3L
MLLT4	THBS4	VPS4A
ELL	KRT9	XPO7
NAP1L1	FBN1	HMBS
CASP7	FBN2	LGALS9C
CASP6	AGL	SNX3
ADK	MYH9	VAMP4
ADAR	MYH10	LPL
LAMB2	COPB2	ITGA4
CDH6	ACTN2	IST1
CDH13	SOAT1	ATP1B3
TPD52	ADD1	GABARAPL2
SEC13	BSG	APOA5
NHP2L1	TIMP3	ERMAP
NPEPPS	FUS	SLC29A1
HNRNPH2	NUP214	VAMP8
OXCT1	DEK	TM9SF3
SUMO3	SOX6	ABCB6
EIF3B	MYH11	FIS1
FCGRT	GLRX	SLC30A1
BID	CHKA	CLCN3
ATP5J2	IGFALS	MARCHF8
GFRA1	AHR	MFGE8
RRP1	KRT2	ATP7A
MARS	HMGCL	CLCN5
ITGA1	FLT4	RPIA
ATP5E;ATP5EP2	KDR	CCDC152
ATP5I	PSMC2	NUP188
LGALS4	SLC16A2	SAMD9L
EIF6	GGT5	GALNT11
CTBP2	GJA5	TNFRSF10C
NDUFA6	GJC1	XRN1
CLDN12	ARL2	DPYSL5
BCAR1	ARL3	STARD3
C21orf59	TRIM23	MARCKS
JAM2	MAP2K2	ADAMTS17
TMEM33	ATP5C1	LYVE1
SYNJ2BP	ATP6V1E1	ERCC6
GEMIN4	CHRFAM7A	FNBP1L
PCBP3	CPOX	DLST
RAB25	RPL4	PRSS3
CORO7	NUDT1	IGLV5052
CLDN2	LONP1	PRIM1
NUP107	PGM1	SLAIN2
SNX16	PPP1CC	ART4
EPPK1	TGFBR1	NCKAP1L
ANTXR2	GNL1	ASPDH
MLF1	SERPINB5	KIAA0753
ADAMTS12	POLR2I	ICAM2
MTPN	SERPINF1	CIRBP
GNG2	DLST	VNN2
ARPC4	GMPR	SRGN
CD81	GPX4	CD53
SEC61G	HSD17B2	BTK
TPI1	SRP14	PEAR1
EIF3E	NUP62	LAMTOR1
SEC61B	PPARG	SLC44A1
PPP4C	HPCAL1	ATP13A1
GABARAPL2	FDFT1	ABCC6
UBE2G2	TAGLN2	DNM1L
MYL6	TALDO1	PRKCB
ACTB	SNCA	PRKCA
EIF4A1	ETFB	CLIP1
RPS20	RBMX	FKBP1A
PRPS1	COIL	CAPNS2
PSMA6	GGCX	RARRES2
S100A10	LIPA	PLCH1
CDC42	ATP6V1A	VAMP2
DSTN	HSPA9	VAMP3
GMFB	EIF4A3	PLXDC2
RAB8A	IGHMBP2	SNX12
SPCS3	RPS19	FARP1
SRP54	RPL3	RGSL1
RAB2A	COL15A1	PAPLN
RAB5B	COL18A1	CHD8
CKS1B	GRIK1	IGKV1D08
RAB10	MPV17	MUC16
CXCR4	DDOST	KIAA1958
UBE2D3;UBE2D2	ANP32A	DNAJC11
UBE2M	FEN1	EFEMP2
UBE2K	CAPG	SSC5D
UBE2N	CAP2	MPDZ
RAB14	DCT	PIP4K2A
ACTR3	IL6ST	STOX1
ACTR2	CEACAM6	CENPE
ACTR1A	TXLNA	JMJD1C
TMEM258	CCT6A	SLC35D2
COPS2	NNMT	EPHA1
ABCE1	PSMB10	SEPTIN8
RAP1B	RPL13A	SEPTIN6
RAP2B	ARL1	SEPTIN11
RPS3A	ARL4A	ABI2
RPL26L1;RPL26	STAT3	KALRN
PSME3	USP8	STX6
RPL15	MDH1	SH3BGRL
MAGOH	MDH2	CR1
RPL27	RFC5	STAT3
ATP6V0D1	RFC3	RAB27A
PCBD1	HADHA	SEPTIN7
RPL37A	PMEL	LY6G6F
RHOA	EIF2S3	SEPTIN14
RND3	CASR	SMIM5
NCALD	CETN2	TSPAN33
HSPE1	MNDA	TREML1
SEC61A1;SEC61A2	WNT5A	ATP6V0A1
LYZ	PTGDS	MGLL
ST8SIA6	BUD31	NAPB
VBP1	UBA7	VTI1B
STXBP1	NAA10	WASF3
B2M	P2RY2	RNF11
TGFB2	PPP1R2P3	VTA1
NPC2	CSK	LRRC26
COPZ1	GARS	OSBPL5
GNG11	IARS	TSPAN2
SUMO2	SLC19A1	TMPRSS2
UFM1	EIF1	SPINK5
DCAF7	TSPAN7	NAALAD2
WDR5	PRKCI	SIRPB1
LMO4	ACTR1B	TREH
NUTF2	ECI1	CTSV
HNRNPK	TMPO	SCGB1D2
YWHAG	STAT1	PRB2
USP46	STAT5A	SMR3B
RRAS2	SKIV2L2	CSTB
TIMM10	AKR1C3	CST2
TSPAN5	MTOR	PI3
RPS7	PI4KA	LORICRIN
PPP1CA	EPS15	CST5
PPP1CB	CASP3	SPINK7
CALM1	CASP2	NPC2
NCS1	RPS27	FOLH1
PSMC1	FRK	SCGB2A2
PSMC5	NCAPD3	WFDC2
RPS8	LRPPRC	PSME4
RPS15A	ACAA2	HEPACAM
RPS16	RPL35	ENPP7
UBE2H	CDKN2A	GSTA5
YWHAE	CDKN2C	CLRN3
RPS14	PRCP	SVIP
RPS23	CXCL5	WFDC12
RPS18	HTT	TMBIM1
RPS29	ECE1	ITCH
RPS13	MTHFR	FNDC11
RPS11	SLC1A3	EPS8L2
SNRPE	SLC1A1	HOMER2
SNRPF	SLC1A4	SUSD2
SNRPD1	PAFAH1B1	CA14
SNRPD2	MCAM	PRB1
SNRPD3	DCC	ZNF99
TMSB4X	CRAT	CTSH
ARF6	CTSK	KLK8
PSMC6	MATR3	KIF2A
RPL7A	MSH2	DNM3
ETF1	GRK6	PLEKHG1
CNBP	GPD2	PRKAR1B
YPEL5	SSR1	CORO6
RPS4X	ALDH3B1	STXBP3
PPP2CB	MAGEA4	NCK2
ACTA2;ACTG2	MAGEA10	TNFAIP8
RHOB	MAGEA11	GLUL
RPL23A	ZAP70	CD46
RPS6	SYK	PRKACA
VSNL1	RANBP1	GNAZ
HIST1H4A	NAMPT	ITGAL
RAB1A	KIR3DL2	PRKACB
RAN	PSMC4	OAS2
RPL23	TSFM	GRK4
RAP1A	TNNT3	UBE2N
RPS15	MMP13	SUMO2
RPS24	ABCG1	PIP4K2B
RPS25	PPIC	IQGAP2
RPS26;RPS26P11	VDAC2	CNN3
RPS28	ACADSB	LTB4R
FAU	CBX5	UBE2NL
GNB1	USP5	TAOK1
POLR2L	MAP2K4	RASGRP2
RBX1	MKI67	PROSER2
GNB2	PHKA1	C2orf88
RPL30	SLC15A1	PSTPIP2
RPL39P5;RPL39	RANGAP1	CD84
RPL31	RECQL	CAB39
RPL10A	NOP2	CDC42BPB
RPL32	ATRX	KDM6A
RPL11	CRK	DIAPH1
RPL8	CRKL	WIPF1
PPIA	BAG6	ALDH1L1
FKBP1A	NSF	AKR1C4
RPS27A	NOTCH1	AKR1C2
GRB2	MAP2K3	AKR1C1
TRA2B	BRCC3	ALDH1L2
RAC1	RPL27A	COPS7B
AP2B1	RPL5	ABCA1
VAMP2	RPL21	ATP2B1
GNAS	RPL28	ATP2B4
GNAI1	RPS9	ATP2B3
PPP3R1	RPS5	LXN
YWHAZ	RPS10	EMILIN2
PPP2R2A	MAP1B	PCBP2
SUMO1	GNPDA1	GGT5
DYNLL1	NEDD4	KAT2A
DYNLT1	UTRN	RASSF6
RPL38	IQGAP1	CCDC34
SKP1	GYG1	TRAJ61
GNG5	STT3A	PRL
RPS21	RABIF	NGEF
EIF5A;EIF5AL1;EIF5A2	PLA2G4A	C22orf31
GNB2L1	CAPZA2	ATP2A2
ACTG1	CAPZB	TMEM33
UBE2I	EIF1AX	SERPINA2
TMSB10	OR3A3	OPTN
PPP2CA	ALDH1A3	ST3GAL5
YBX1	QARS	NIPBL
SEC11A	RPL29	N4BP2
CSNK2B	LGALS7	FCRL3
TPM4	NPTX2	MCUR1
ACTC1;ACTA1	UQCRFS1	ITGB7
UBE2L3	XDH	ITGB5
EEF1A1;EEF1A1P5	SLC6A8	PIK3CB
TUBA1B	ATP5O	ABCE1
TUBA4A	LIMS1	TAB3
TUBB4B	GLIPR1	CD8A
CSNK2A1;CSNK2A3	CXCL12	CD3E
PAFAH1B2	SLC6A9	PPP1R18
HIST1H3A;H3F3C	PREP	CD82
HBA1	ME1	MARCKSL1
CXADR	IREB2	RALGAPB
IGBP1	TFPI2	EMCN
SIRPA;SIRPB1	PIP4K2A	DNPEP
ADAM8	ARCN1	TMC8
PSPH	LSS	RHOV
EIF4G2	GCLC	PCBP3
RPP30	GCLM	COQ5
[truncated: 6,909 more rows]
