# Supplementary material for: A novel machine learning algorithm selects proteome signature to specifically identify cancer exosomes
Source: eLife. 2024 Mar 26;12:RP90390. doi: 10.7554/eLife.90390 (PMC10965221; doi:10.7554/eLife.90390)
Supplement: Figure 2—source data 2. [file elife-90390-fig2-data2.csv]

gene	MS13375_Bruno_Lyden_MCF7_bone_A	MS13375_Bruno_Lyden_MCF7_bone_B	MS13375_Bruno_Lyden_MCF7_bone_c	MS13451QE_Bruno_Lyden_831brain_A	MS13451QE_Bruno_Lyden_831brain_B	MS13451QE_Bruno_Lyden_831brain_C	MS13451QE_Bruno_Lyden_BXPC3pacreatic_A	MS13451QE_Bruno_Lyden_BXPC3pacreatic_B	MS13451QE_Bruno_Lyden_BXPC3pacreatic_C	MS13451QE_Bruno_Lyden_BXPC3pacreatic_C_repeat	MS13451QE_Bruno_Lyden_HPAF2pacreatic_A	MS13451QE_Bruno_Lyden_HPAF2pacreatic_B	MS13451QE_Bruno_Lyden_HPAF2pacreatic_C	MS13451QE_Bruno_Lyden_SNU16gastric_A	MS13451QE_Bruno_Lyden_SNU16gastric_B	MS13451QE_Bruno_Lyden_SNU16gastric_C	MS13451QE_Bruno_Lyden_SNU1gastric_A	MS13451QE_Bruno_Lyden_SNU1gastric_B	MS13451QE_Bruno_Lyden_SNU1gastric_C	MS13511QE_Bruno_Lyden_143B_A	MS13511QE_Bruno_Lyden_143B_B	MS13511QE_Bruno_Lyden_143B_C	MS13511QE_Bruno_Lyden_SKES1_A	MS13511QE_Bruno_Lyden_SKES1_B	MS13511QE_Bruno_Lyden_SKES1_C	MS13512QE_Bruno_Lyden_IMR5_A	MS13512QE_Bruno_Lyden_IMR5_B	MS13512QE_Bruno_Lyden_IMR5_C	MS13512QE_Bruno_Lyden_SKNBe2_A	MS13512QE_Bruno_Lyden_SKNBe2_B	MS13512QE_Bruno_Lyden_SKNBe2_C	MS13546QE_Bruno_Lyden_1118_A	MS13546QE_Bruno_Lyden_H1650_A	MS13546QE_Bruno_Lyden_H1975_A	MS13546QE_Bruno_Lyden_H292_A	MS13546QE_Bruno_Lyden_Pc9_A	MS13618QE_Bruno_Lyden_9609	MS13638QE_Bruno_Lyden_SKBr.3	MS13638QE_Bruno_Lyden_WI38	MS13666QE_Bruno_Lyden_4173	MS13666QE_Bruno_Lyden_4180	MS141005QE_Bruno_Lyden_MPNST_repeat	MS141031QE_Bruno_Lyden_A459	MS141031QE_Bruno_Lyden_ET2B	MS141031QE_Bruno_Lyden_H2228	MS141031QE_Bruno_Lyden_H358	MS141032QE_Bruno_Lyden_UVEALmelanoma	MS141070QE_Bruno_Lyden_M2	MS141070QE_Bruno_Lyden_M9
group	Cancer	Cancer	Cancer	Cancer	Cancer	Cancer	Cancer	Cancer	Cancer	Cancer	Cancer	Cancer	Cancer	Cancer	Cancer	Cancer	Cancer	Cancer	Cancer	Cancer	Cancer	Cancer	Cancer	Cancer	Cancer	Cancer	Cancer	Cancer	Cancer	Cancer	Cancer	Control	Cancer	Cancer	Cancer	Cancer	Control	Cancer	Control	Cancer	Cancer	Cancer	Cancer	Cancer	Cancer	Cancer	Cancer	Cancer	Cancer
GNB2	8.146128039	8.230448924	8.230448924	0	0	0	7.792391697	7.869231726	7.924279291	7.763428001	7.230448947	7.278753624	7.278753624	6.716003427	0	6.544068168	7.897627097	7.939519258	7.724275878	8.07918125	8.07918125	8.041392689	7.447158047	7.944482677	7.832508919	8.342422683	8.462397999	8.491361695	8.342422683	8.000000004	7.832508919	8.944482673	8.913813853	9.146128036	8.959041393	8.568201725	8.113943356	8.662757833	8.477121256	9.041392686	9.079181246	8.41497335	7.361727855	0	8.681241238	9.707570176	8.491361695	9.204119983	8.892094603
SLC3A2	8.591064608	8.602059992	8.716003344	6.778151323	7.414973365	7.397940026	8.07918125	8.176091262	8.041392689	8.000000004	7.755874863	7.724275878	7.812913363	7.361727855	7.146128067	6.9731279	7.716003352	7.845098046	7.785329842	7.633468466	7.643452686	7.698970013	7.568201736	7.278753624	7.041392725	8.07918125	7.792391697	7.875061269	8.113943356	7.949390012	7.954242514	9.204119983	9	8.968482949	9.86923172	8.361727838	7.491361708	9.113943353	0	9.204119983	8.447158033	8.204119985	8.748188028	7.113943386	9.204119983	10.23044892	9.113943353	8.662757833	0
LGALS3BP	0	0	0	7.230448947	7.361727855	7.414973365	7.763428001	7.778151258	7.913813858	7.643452686	7.732393768	7.579783608	7.716003352	6.740362768	6.633468557	6.748188105	0	0	0	0	0	0	0	0	0	0	0	0	6.301030213	7.53147893	7.568201736	0	8.041392689	6.857332557	6.477121399	7.897627097	0	8.342422683	8.913813853	9.041392686	8.568201725	7.929418931	0	0	7.633468466	8.72427587	0	8.447158033	0
TFRC	7.579783608	7.556302513	7.612783867	0	0	0	7.99122608	8.000000004	8.041392689	7.959041397	8.113943356	7.643452686	7.662757841	0	0	0	7.146128067	7.176091288	7.301030017	8.301029998	8.255272508	8.204119985	7.602060002	7.755874863	7.602060002	8.602059992	8.447158033	8.518513941	8.690196081	8.672097859	8.681241238	8.518513941	8.544068046	8.707570177	8.568201725	8.643452677	8.000000004	8.41497335	8.07918125	8.342422683	7.778151258	7.897627097	8.39794001	0	8.544068046	9.204119983	8.230448924	8.623249291	8.041392689
GNAI2	7.832508919	7.968482953	7.973127858	7.041392725	7.079181282	7.079181282	7.732393768	7.732393768	7.716003352	7.653212523	7.447158047	7.176091288	7.301030017	6.982271278	6.880813649	7.000000043	7.623249301	7.612783867	7.591064618	7.869231726	7.886490731	7.838849097	7.447158047	7.770852019	7.623249301	8.301029998	8.462397999	8.491361695	8.342422683	8.556302502	8.518513941	8.579783598	8.698970005	8.568201725	8.301029998	8.230448924	7.681241246	8.204119985	0	8.919078093	8.924279287	8.278753603	7.623249301	0	8.568201725	9.748188027	8.857332497	9	8.322219297
ATP1A1	7.934498456	8.041392689	8.041392689	7.000000043	7.000000043	7.518513953	8.07918125	8.146128039	8.176091262	8.07918125	7.770852019	7.518513953	7.591064618	6.832508977	6.755874932	6.880813649	7.301030017	7.477121269	7.43136378	8.146128039	8.176091262	8.176091262	7.880813598	7.968482953	7.623249301	8.342422683	8.579783598	8.681241238	8.39794001	8.301029998	8.301029998	8.986771735	8.986771735	8.681241238	8.770852012	8.544068046	7.845098046	7.954242514	0	9.146128036	8.698970005	8.113943356	7.851258355	0	8.763427994	9.973127854	9.322219295	8.690196081	0
KRT18	7.176091288	7.342422701	7.361727855	0	0	0	7.342422701	7.255272529	7.414973365	7.278753624	7.000000043	6.819544001	6.924279338	6.662757926	6.612783963	6.397940182	0	0	0	0	0	8.113943356	0	0	0	0	7.924279291	8.07918125	0	7.97772361	7.924279291	8.431363766	8.518513941	7.982271238	7.886490731	7.934498456	7.892094608	8.939519253	0	7.716003352	0	0	6.944482722	8.698970005	7.799340556	8.716003344	0	9.278753601	8.113943356
S100A6	6.301030213	0	5.886491289	8.892094603	7.414973365	8.79934055	9.623249291	9.623249291	9.431363764	8.278753603	7.968482953	7.869231726	8.716003344	8.204119985	8.255272508	8.230448924	9.176091259	9.397940009	9.361727836	0	0	6.230449177	0	0	0	0	0	0	0	0	0	6.633468557	8.491361695	6.939519303	6.857332557	0	9.322219295	7.079181282	9.113943353	9.944482672	9.491361694	8.301029998	8.518513941	8.176091262	8.322219297	9.230448922	7.322219315	8.934498452	0
PFN1	7.176091288	6.518514071	7.079181282	7.518513953	7.845098046	7.672097867	8.204119985	8.176091262	8.204119985	8.230448924	7.792391697	7.672097867	0	7.623249301	7.819543942	7.623249301	8.477121256	8.568201725	8.50514998	8.301029998	8.278753603	8.278753603	8.278753603	7.944482677	7.740362697	8.919078093	8.838849091	8.986771735	8.50514998	8.612783858	8.643452677	8.698970005	8.74036269	8.361727838	8.633468457	8.462397999	8.342422683	9	8.875061264	9.278753601	8.903089988	9.380211242	8.653212515	0	8.612783858	9.531478917	9.146128036	10.11394335	10.63346846
GNAI3	7.826074809	7.968482953	7.973127858	7.20412001	7.20412001	7.176091288	7.724275878	7.740362697	7.724275878	7.612783867	7.38021126	7.113943386	7.230448947	7.041392725	7.113943386	7.146128067	7.579783608	7.568201736	7.53147893	7.913813858	7.897627097	7.857332502	7.230448947	7.770852019	7.579783608	8.301029998	8.462397999	8.491361695	8.255272508	8.556302502	8.518513941	8.591064608	8.698970005	8.531478918	8.322219297	8.176091262	7.361727855	8.301029998	0	8.755874856	8.819543936	8.491361695	7.623249301	0	8.531478918	9.633468456	8.832508913	8.982271233	8.176091262
HSPA5	7.591064618	7.113943386	7.491361708	6.806180042	6.908485072	6.875061321	8.462397999	8.531478918	8.544068046	8.531478918	8.491361695	8.322219297	8.41497335	6.681241328	6.623249394	6.477121399	7.944482677	8.000000004	8.000000004	8.698970005	8.643452677	8.602059992	8.176091262	8.000000004	7.838849097	9.079181246	8.939519253	9	8.146128039	8.716003344	8.698970005	8.806179975	8.826074803	8.672097859	8.633468457	8.531478918	8.477121256	8.903089988	8.819543936	9.176091259	9.230448922	9.079181246	8.623249291	6.491361834	8.908485019	9.462397998	8.643452677	9.785329835	10.11394335
HSP90B1	6.342422878	6.361728025	6.361728025	7.740362697	7.643452686	7.079181282	8.491361695	8.838849091	8.778151251	8.518513941	8.778151251	8.544068046	8.556302502	7.544068057	7.255272529	7.230448947	7.778151258	7.897627097	8.07918125	7.342422701	7.230448947	7.176091288	8.204119985	8.301029998	7.755874863	8.662757833	7.908485024	7.845098046	8.447158033	8.491361695	8.50514998	8.568201725	8.041392689	8.113943356	8.380211244	8.146128039	7.361727855	8.447158033	8.380211244	8.653212515	8.39794001	8.819543936	7.869231726	6.27875383	8.518513941	9.113943353	8.361727838	9.301029996	9.681241237
ANPEP	0	0	0	0	0	0	0	0	0	0	0	0	0	0	0	0	7.556302513	7.653212523	7.792391697	6.880813649	0	6.897627146	0	0	0	0	0	0	0	0	0	0	0	8.204119985	0	0	0	0	0	0	0	8.041392689	0	0	0	0	0	8.230448924	7.806179981
EZR	7.643452686	7.698970013	7.763428001	0	6.929418977	6.716003427	8.755874856	8.770852012	8.653212515	8.579783598	7.869231726	7.724275878	7.748188035	7.361727855	7.447158047	7.672097867	8.579783598	8.74036269	8.698970005	7.662757841	7.643452686	7.643452686	7.544068057	0	7.146128067	8.380211244	8.380211244	8.39794001	8.041392689	7.982271238	8.000000004	9.278753601	8.86923172	9	8.924279287	8.74036269	8.278753603	8.07918125	8.431363766	9.361727836	9.204119983	8.819543936	8.361727838	0	8.986771735	10	9.322219295	9.113943353	9.041392686
CD44	6.763428068	6.643452775	0	6.903090041	6.934498502	6.949390055	7.38021126	7.414973365	7.38021126	7.342422701	0	0	0	7.792391697	7.785329842	7.770852019	0	0	0	7.698970013	7.672097867	7.556302513	0	0	0	0	0	0	7.278753624	0	6.9731279	6.875061321	8.806179975	8.176091262	8.176091262	8.301029998	0	0	0	8.612783858	8.322219297	8.000000004	7.000000043	0	7.826074809	8.39794001	9.041392686	7.897627097	0
MSN	7.255272529	7.414973365	7.477121269	7.462398013	7.612783867	7.43136378	8.698970005	8.716003344	8.531478918	8.544068046	7.491361708	7.43136378	7.43136378	0	0	6.880813649	8.531478918	8.698970005	8.556302502	7.924279291	7.919078098	7.897627097	7.544068057	0	7.414973365	8.278753603	8.301029998	8.342422683	8.041392689	7.982271238	8.000000004	9	8.944482673	9	8.653212515	8.72427587	8.301029998	8.07918125	8.462397999	9.361727836	9.204119983	8.819543936	8.361727838	0	9	10	9.322219295	9.113943353	9.041392686
STOM	7.819543942	6.995635238	7.698970013	0	0	0	7.041392725	7.000000043	7.230448947	7.041392725	7.255272529	6.982271278	7.079181282	0	0	0	7.20412001	7.38021126	6.85125841	7.301030017	7.20412001	7.322219315	7.653212523	7.544068057	7.255272529	7.897627097	8.041392689	7.518513953	8.255272508	8.342422683	8.278753603	8.698970005	8.342422683	8.707570177	8.875061264	8.204119985	7.806179981	7.20412001	7.43136378	8.41497335	7.819543942	8.278753603	7.934498456	0	8.806179975	9.342422681	9.204119983	8.342422683	0
YWHAQ	7.176091288	7.397940026	7.255272529	6.740362768	6.919078145	6.968482995	8.230448924	8.204119985	8.204119985	8.176091262	7.505149992	7.43136378	7.462398013	6.924279338	6.812913423	6.785329906	7.792391697	8.176091262	8.176091262	7.944482677	7.838849097	7.778151258	7.579783608	7.397940026	7.361727855	8.531478918	8.39794001	8.431363766	8.462397999	8.477121256	8.462397999	8.672097859	8.919078093	8.653212515	8.698970005	8.278753603	8.041392689	7.982271238	8.544068046	8.662757833	8.74036269	8.672097859	8.041392689	7.176091288	9.568201724	9.963787827	9.633468456	9.380211242	9.51851394
YWHAB	7.146128067	6.748188105	7.322219315	6.857332557	7.361727855	7.361727855	8.204119985	8.146128039	8.113943356	8.113943356	7.477121269	7.361727855	7.491361708	7.397940026	7.397940026	7.491361708	7.556302513	8.204119985	8.176091262	8.146128039	8.041392689	7.959041397	7.278753624	7.079181282	7.000000043	8.041392689	8.230448924	8.361727838	8.462397999	8.322219297	8.361727838	8.39794001	9	8.544068046	8.785329836	8.07918125	7.792391697	8.204119985	8.176091262	8.897627092	8.491361695	8.176091262	8.113943356	8.113943356	9.579783597	9.806179974	9.633468456	9.301029996	9.255272505
SFN	7.255272529	6.73239384	7.38021126	0	0	0	8.146128039	8.07918125	8.041392689	8.07918125	7.591064618	7.505149992	7.544068057	7.643452686	7.38021126	7.591064618	7.342422701	8.204119985	8.176091262	7.778151258	7.672097867	7.740362697	7.53147893	7.361727855	7.278753624	7.591064618	8.176091262	8.176091262	8.431363766	8.278753603	8.50514998	8.579783598	8.86923172	8.301029998	8.322219297	7.863322866	7.301030017	0	0	8.278753603	7.662757841	0	0	0	9.568201724	9.785329835	9.77815125	9.698970004	9.204119983
S100A11	0	0	0	7.838849097	7.579783608	7.591064618	8.342422683	8.544068046	8.041392689	8.176091262	7.38021126	7.146128067	7.146128067	0	7.361727855	6.568201841	7.845098046	7.880813598	7.681241246	6.591064718	6.176091549	6.255272746	0	0	0	0	0	0	7.079181282	0	6.778151323	7.924279291	8.301029998	8.176091262	8.255272508	7.568201736	7.908485024	8.863322861	0	8.903089988	8.633468457	0	7.690196089	0	8.79934055	9.176091259	8.255272508	9.544068044	8.832508913
PRDX2	0	7.322219315	7.255272529	0	0	0	7.322219315	7.230448947	7.146128067	7.000000043	6.944482722	6.505150114	6.716003427	6.662757926	0	7.113943386	8.146128039	8.07918125	7.949390012	7.447158047	0	0	0	7.579783608	7.301030017	7.301030017	7.322219315	8.146128039	7.707570185	7.982271238	7.643452686	8.838849091	7.954242514	7.832508919	8.113943356	7.505149992	0	8.939519253	0	8.146128039	0	0	7.99122608	7.755874863	8.50514998	9.146128036	0	8.982271233	8.924279287
RDX	7.255272529	7.414973365	7.477121269	0	0	0	8.698970005	8.716003344	8.50514998	8.544068046	7.544068057	7.43136378	7.43136378	0	0	6.880813649	8.462397999	8.698970005	8.50514998	7.662757841	7.643452686	7.643452686	7.623249301	0	7.146128067	8.278753603	8.301029998	8.342422683	8.041392689	7.982271238	8.000000004	9.079181246	8.806179975	8.919078093	8.602059992	8.72427587	8.278753603	8.07918125	8.431363766	9.361727836	9.204119983	8.819543936	8.361727838	0	8.986771735	10	9.322219295	9.113943353	9.041392686
YWHAG	7.681241246	7.690196089	7.740362697	7.863322866	7.556302513	0	8.301029998	8.176091262	8.113943356	8.113943356	7.556302513	7.568201736	7.518513953	8.113943356	8.146128039	7.959041397	7.913813858	8.146128039	8.255272508	7.724275878	7.579783608	7.43136378	7.477121269	7.591064618	7.477121269	8.176091262	8.230448924	8.255272508	8.41497335	8.255272508	8.230448924	8.763427994	8.897627092	8.568201725	8.361727838	7.913813858	7.724275878	8.361727838	8.531478918	8.50514998	8.568201725	8.176091262	7.939519258	0	9.556302501	9.812913357	9.633468456	9.204119983	9.255272505
YWHAE	7.662757841	7.477121269	7.633468466	6.968482995	6.838849154	6.806180042	8.146128039	8.278753603	8.278753603	8.230448924	7.556302513	7.477121269	7.491361708	6.65321261	6.681241328	6.770852085	8.146128039	8.342422683	8.113943356	8.204119985	8.146128039	8.146128039	7.690196089	7.43136378	7.361727855	8.707570177	8.531478918	8.623249291	8.491361695	8.518513941	8.477121256	9.041392686	8.86923172	8.95424251	8.982271233	8.643452677	8.361727838	8.770852012	8.74036269	9.146128036	9.041392686	8.929418926	7.672097867	0	9.579783597	10	9.681241237	9.342422681	9.361727836
GNB1	7.934498456	8.146128039	8.146128039	7.698970013	6.67209795	6.826074868	8.000000004	8.204119985	8.204119985	7.924279291	7.079181282	7.477121269	7.447158047	7.361727855	6.99122612	6.875061321	8.204119985	7.954242514	8.204119985	8.146128039	8.113943356	8.07918125	7.863322866	7.778151258	7.20412001	8.556302502	8.662757833	8.681241238	8.602059992	8.41497335	8.447158033	8.949390007	8.838849091	9.113943353	8.919078093	8.579783598	8.380211244	8.380211244	8.204119985	9	9.204119983	8.74036269	8.041392689	0	8.681241238	9.875061263	8.462397999	9.204119983	9
RPS27A	7.919078098	7.819543942	7.845098046	7.897627097	7.924279291	7.919078098	8.612783858	8.591064608	8.643452677	8.556302502	8.531478918	8.322219297	8.380211244	7.591064618	7.518513953	7.681241246	7.913813858	8.041392689	8.000000004	8.778151251	8.623249291	8.716003344	8.892094603	8.770852012	8.612783858	9.556302501	9.643452677	9.707570176	9.322219295	9.623249291	9.602059991	9.204119983	9.491361694	8.851258349	9.612783857	8.72427587	9.301029996	9.707570176	8.845098041	9.643452677	9.84509804	9.176091259	9.342422681	7.869231726	9.431363764	10.25527251	10.2787536	9.662757832	8.591064608
YWHAZ	7.740362697	7.716003352	7.672097867	6.913813905	7.079181282	7.301030017	8.462397999	8.431363766	8.278753603	8.230448924	7.681241246	7.518513953	7.623249301	8.041392689	8.041392689	7.322219315	8.07918125	8.361727838	8.322219297	8.113943356	8.041392689	8.041392689	8.041392689	7.954242514	7.681241246	8.518513941	8.518513941	8.544068046	8.72427587	8.662757833	8.633468457	9.176091259	9.041392686	9.041392686	9.079181246	8.556302502	8.041392689	8.643452677	8.301029998	9.041392686	9	8.698970005	8.322219297	7.832508919	9.602059991	10.14612804	9.716003344	9.397940009	9.322219295
CLTC	7.913813858	7.929418931	7.903089992	8.146128039	8.342422683	8.230448924	7.944482677	7.740362697	7.763428001	7.505149992	7.903089992	7.732393768	7.924279291	8.903089988	8.819543936	8.806179975	8.146128039	8.301029998	8.176091262	8.301029998	8.146128039	8.113943356	7.763428001	7.602060002	7.397940026	8.755874856	8.79934055	8.79239169	8.826074803	8.812913357	8.79239169	9.041392686	8.301029998	8.602059992	8.698970005	8.301029998	8.322219297	9.301029996	8.716003344	8.908485019	9	8.74036269	8.79239169	7.716003352	8.568201725	9.380211242	8.255272508	10.14612804	10
YWHAH	7.230448947	7.079181282	7.322219315	0	0	0	8.07918125	8.07918125	8.113943356	8.477121256	7.447158047	7.505149992	7.397940026	6.819544001	6.812913423	7.462398013	7.361727855	8.041392689	8.041392689	7.612783867	7.591064618	7.740362697	7.53147893	7.361727855	7.278753624	7.322219315	8.176091262	8.000000004	8.361727838	8.544068046	8.255272508	8.255272508	8.851258349	8.342422683	7.079181282	7.897627097	7.113943386	0	0	8.000000004	7.732393768	0	0	0	9.544068044	9.73239376	9.612783857	9.176091259	9.380211242
CD47	0	6.880813649	6.986771779	0	0	0	7.913813858	7.97772361	8.000000004	7.959041397	7.518513953	7.278753624	7.462398013	0	0	0	7.568201736	7.812913363	7.53147893	0	0	0	0	0	0	0	0	0	0	0	0	8.39794001	8.322219297	7.986771739	7.301030017	7.995635199	0	7.799340556	0	8.204119985	7.763428001	0	0	0	8.544068046	9.255272505	8.518513941	8.568201725	0
CTTN	0	0	0	0	0	0	0	0	0	0	0	0	0	0	0	0	0	0	0	0	0	0	0	0	0	0	0	0	0	0	0	0	7.43136378	7.968482953	7.819543942	0	0	0	0	0	0	0	0	0	0	7.845098046	7.681241246	0	0
COL6A1	8.113943356	7.838849097	8.07918125	6.447158186	6.505150114	6.414973515	0	0	0	0	6.819544001	6.447158186	6.6020601	0	0	0	6.301030213	6.612783963	6.623249394	8.491361695	8.41497335	8.447158033	8.851258349	8.612783858	8.41497335	8.643452677	8.74036269	9.079181246	9.176091259	9	8.556302502	8.380211244	7.301030017	8.07918125	8.204119985	8.72427587	8.000000004	8.819543936	9.447158031	8.934498452	8.491361695	9.146128036	8.612783858	0	8.204119985	8.602059992	7.785329842	9	9.255272505
GSN	7.778151258	7.963787832	7.491361708	8.07918125	8.113943356	8.07918125	7.113943386	0	0	6.230449177	7.43136378	7.322219315	6.838849154	6.963787875	6.95904144	0	0	0	0	9.113943353	8.851258349	9.079181246	9.230448922	9	8.86923172	9.653212514	9.716003344	9.698970004	9.72427587	9.602059991	9.602059991	9.079181246	8.477121256	9.255272505	8.929418926	9.397940009	9	9.681241237	9.69019608	9.72427587	9.041392686	9.968482949	9.361727836	6.301030213	9.041392686	9.447158031	8.568201725	9.643452677	9.857332496
CFL1	7.924279291	7.897627097	8.000000004	7.176091288	7.505149992	7.505149992	8.204119985	8.431363766	8.176091262	8.255272508	8.041392689	7.934498456	7.929418931	7.869231726	7.908485024	7.322219315	8.431363766	8.41497335	8.361727838	8.255272508	8.255272508	8.322219297	7.505149992	7.579783608	7.477121269	8.662757833	8.653212515	9	8.322219297	8.863322861	8.857332497	8.986771735	9.361727836	9.079181246	9.431363764	8.623249291	7.97772361	9.079181246	0	9.113943353	8.986771735	8.643452677	8.531478918	6.6020601	8.698970005	10.04139269	9.491361694	9.505149978	9.707570176
S100A10	0	0	0	7.041392725	7.113943386	7.113943386	7.544068057	7.612783867	7.826074809	7.230448947	7.146128067	6.255272746	6.431363925	0	7.146128067	7.079181282	7.623249301	7.886490731	7.919078098	0	0	0	0	0	0	0	0	0	0	0	0	6.707570261	8.113943356	6.806180042	0	0	6.414973515	7.322219315	0	8.431363766	7.643452686	0	7.732393768	8.342422683	8.000000004	8.934498452	7.832508919	9.113943353	8.431363766
B2M	0	0	0	0	7.568201736	7.579783608	7.755874863	8.79934055	8.72427587	8.278753603	7.799340556	7.732393768	6.875061321	0	0	0	6.255272746	7.995635199	7.939519258	0	0	7.113943386	0	0	0	0	0	0	0	0	0	8.838849091	8.230448924	8.322219297	8.07918125	7.897627097	0	0	0	8.79239169	8.50514998	0	0	0	8.544068046	9.301029996	8.643452677	9.204119983	0
PPIA	7.255272529	7.301030017	7.43136378	7.643452686	7.763428001	7.414973365	8.146128039	8.176091262	8.176091262	8.07918125	7.995635199	7.755874863	7.851258355	8.041392689	8.07918125	8.07918125	8.322219297	8.518513941	8.518513941	8.278753603	8.146128039	8.176091262	8.278753603	8.07918125	7.863322866	9.146128036	9.079181246	9.146128036	8.681241238	8.863322861	8.832508913	8.770852012	8.579783598	8.643452677	8.556302502	8.278753603	8.491361695	9.431363764	8.643452677	9.204119983	9.301029996	9.653212514	8.380211244	6.230449177	9.079181246	9.84509804	9.146128036	10.04139269	10.462398
BASP1	7.653212523	7.397940026	7.38021126	0	0	0	0	0	0	0	0	0	0	0	0	0	0	0	0	7.934498456	7.799340556	7.785329842	7.919078098	8.07918125	7.892094608	8.973127854	9.041392686	8.963787828	8.982271233	8.770852012	8.681241238	9.041392686	8.716003344	9	9.079181246	8.146128039	0	7.880813598	0	8.491361695	7.897627097	6.755874932	7.698970013	0	8.000000004	9.230448922	0	7.851258355	0
SLC1A5	7.845098046	7.897627097	7.886490731	0	0	0	7.518513953	7.612783867	7.518513953	7.462398013	7.079181282	6.845098102	6.949390055	6.342422878	0	0	7.176091288	7.361727855	7.361727855	7.462398013	7.255272529	8.146128039	7.041392725	7.176091288	7.20412001	7.322219315	7.643452686	7.518513953	6.591064718	7.322219315	7.724275878	9.204119983	8.72427587	8.544068046	8.934498452	8.230448924	0	0	0	8.39794001	8.462397999	7.763428001	7.949390012	0	8.845098041	8.986771735	8.806179975	7.755874863	0
EHD1	0	6.491361834	7.146128067	6.875061321	6.880813649	6.875061321	7.724275878	7.973127858	7.690196089	7.698970013	7.462398013	7.38021126	7.301030017	7.477121269	7.491361708	7.462398013	7.612783867	7.591064618	7.518513953	7.361727855	7.20412001	7.301030017	7.633468466	7.230448947	7.041392725	8.07918125	8.000000004	8.230448924	7.944482677	7.698970013	7.832508919	8.000000004	8.491361695	7.732393768	7.838849097	8.278753603	7.806179981	8.204119985	8.041392689	8.812913357	8.778151251	8.361727838	7.732393768	0	8.204119985	9.079181246	8.672097859	8.518513941	8.74036269
RAB10	7.748188035	7.568201736	7.477121269	6.342422878	0	6.322219502	7.851258355	7.799340556	7.778151258	7.724275878	7.591064618	7.414973365	7.301030017	6.380211423	0	6.342422878	7.812913363	7.812913363	7.748188035	7.934498456	7.934498456	8.041392689	8.342422683	7.995635199	7.778151258	8.579783598	8.342422683	8.41497335	8.176091262	8.447158033	8.41497335	8.770852012	8.653212515	8.07918125	8.431363766	8.301029998	8.07918125	8.819543936	7.903089992	8.934498452	8.491361695	8.681241238	7.556302513	0	8.72427587	9.556302501	8.832508913	9.079181246	9.431363764
RAB14	7.43136378	7.43136378	7.462398013	0	0	0	7.681241246	7.278753624	7.556302513	7.146128067	7.301030017	7.230448947	6.740362768	0	0	0	7.322219315	7.361727855	7.342422701	8.146128039	8.113943356	8.113943356	7.897627097	8.113943356	7.447158047	8.342422683	8.322219297	8.39794001	7.579783608	8.653212515	8.568201725	8.491361695	8.342422683	7.414973365	8.361727838	8.041392689	8.204119985	8.579783598	7.959041397	8.653212515	8.431363766	8.579783598	0	0	8.431363766	9.113943353	8.255272508	9.113943353	9.342422681
RAB1A	7.732393768	7.53147893	7.447158047	6.322219502	0	0	7.785329842	7.724275878	7.707570185	7.732393768	7.53147893	7.491361708	7.301030017	0	0	0	7.716003352	7.826074809	7.724275878	7.934498456	8.041392689	7.913813858	8.342422683	7.995635199	7.778151258	8.602059992	8.477121256	8.531478918	8.556302502	8.431363766	8.39794001	8.770852012	8.531478918	8.000000004	8.361727838	8.322219297	8.113943356	8.880813593	7.959041397	8.959041393	8.623249291	8.86923172	7.763428001	0	8.812913357	9.568201724	8.875061264	9.278753601	9.556302501
RAB35	7.799340556	7.633468466	7.53147893	7.079181282	6.968482995	7.041392725	7.838849097	8.07918125	7.770852019	8.000000004	7.518513953	7.491361708	7.633468466	7.041392725	6.982271278	7.000000043	7.643452686	7.716003352	7.591064618	8.07918125	8.041392689	8.041392689	8.342422683	7.995635199	7.778151258	8.556302502	8.301029998	8.832508913	8.556302502	8.579783598	8.380211244	8.707570177	8.518513941	7.886490731	8.361727838	8.255272508	8.176091262	8.897627092	7.959041397	8.875061264	8.568201725	8.845098041	7.079181282	0	8.698970005	9.491361694	8.778151251	9.041392686	9.414973348
RAB1B	7.763428001	7.612783867	7.544068057	0	6.380211423	0	7.785329842	7.724275878	7.707570185	7.732393768	7.53147893	7.342422701	7.301030017	0	0	0	7.716003352	7.826074809	7.724275878	7.934498456	8.041392689	7.913813858	8.07918125	7.845098046	7.623249301	8.612783858	8.39794001	8.431363766	8.431363766	8.431363766	8.39794001	8.770852012	8.544068046	8.204119985	8.361727838	8.322219297	8.113943356	8.838849091	7.959041397	8.959041393	8.623249291	8.86923172	7.785329842	0	8.812913357	9.568201724	8.875061264	9.278753601	9.556302501
TLN1	6.995635238	7.518513953	7.361727855	7.612783867	7.556302513	7.556302513	6.146128346	8.113943356	6.812913423	6.544068168	6.819544001	6.301030213	0	7.079181282	6.95904144	7.079181282	7.342422701	7.342422701	7.322219315	8.146128039	8.146128039	8.07918125	8.204119985	7.892094608	7.954242514	8.698970005	8.732393761	8.939519253	8.892094603	8.819543936	8.812913357	8.380211244	7.944482677	8.361727838	8.361727838	8.431363766	8.361727838	8.924279287	9.146128036	9.041392686	8.623249291	9	8.531478918	0	8.518513941	9.079181246	8.041392689	8.838849091	9.146128036
TUBA4A	7.361727855	7.176091288	7.591064618	7.880813598	0	0	8.146128039	8.113943356	8.07918125	7.863322866	7.934498456	7.919078098	7.812913363	8.146128039	8.07918125	8.113943356	8.342422683	8.230448924	8.278753603	8.301029998	8.204119985	8.176091262	8.477121256	8.361727838	8.255272508	8.690196081	8.447158033	8.732393761	8.342422683	8.41497335	8.491361695	8.612783858	8.176091262	8.278753603	8.301029998	8.301029998	8.892094603	9.886490725	9.230448922	9.602059991	9.041392686	9.278753601	9.041392686	7.477121269	8.832508913	9.361727836	8.633468457	9.838849091	10.25527251
FLNA	0	6.322219502	6.079181608	7.397940026	7.447158047	7.544068057	7.397940026	7.447158047	7.342422701	7.662757841	7.544068057	7.322219315	7.414973365	7.079181282	7.113943386	7.113943386	7.740362697	7.041392725	7.544068057	7.698970013	7.491361708	7.491361708	7.544068057	7.491361708	6.806180042	7.748188035	7.995635199	8.041392689	8.361727838	8.204119985	8.342422683	8.204119985	8.146128039	8.832508913	8.832508913	8.361727838	7.944482677	8.278753603	8.230448924	8.41497335	8.447158033	8.447158033	8.113943356	0	8.07918125	9.079181246	7.908485024	8.886490726	9.113943353
SDCBP	6.903090041	7.278753624	7.079181282	8.230448924	8.278753603	8.322219297	8.748188028	8.322219297	8.591064608	7.113943386	8.602059992	8.568201725	8.50514998	8.230448924	8.255272508	8.230448924	7.477121269	8.698970005	8.462397999	8.301029998	8.07918125	7.643452686	8.255272508	8.041392689	7.623249301	8.908485019	8.707570177	9.041392686	7.986771739	8.50514998	8.568201725	8.000000004	8.176091262	7.986771739	7.43136378	8.146128039	8.50514998	8.612783858	8.361727838	9.531478917	9	8.886490726	8.892094603	0	8.633468457	9.342422681	9.491361694	8.342422683	0
AHCYL1	7.361727855	7.342422701	7.361727855	6.544068168	0	0	6.113943686	6.968482995	6.763428068	0	7.079181282	6.778151323	0	0	6.799340618	7.041392725	7.000000043	7.079181282	6.531479045	8.39794001	8.39794001	8.380211244	8.361727838	8.230448924	8.230448924	0	0	9.230448922	0	8.39794001	8.41497335	7.903089992	7.491361708	8.176091262	6.770852085	8.278753603	8.113943356	7.770852019	8.041392689	7.939519258	0	9.230448922	0	0	7.38021126	8.255272508	7.838849097	8.556302502	8.903089988
WDR1	6.698970091	6.65321261	6.633468557	7.079181282	6.724275952	7.079181282	7.462398013	7.518513953	7.623249301	7.079181282	7.255272529	6.913813905	6.919078145	7.041392725	0	6.85125841	7.113943386	7.322219315	7.255272529	8.000000004	7.913813858	7.851258355	8.041392689	7.908485024	7.690196089	8.681241238	8.763427994	8.79239169	8.07918125	8.322219297	8.301029998	8.113943356	7.99122608	8.204119985	8.462397999	8.07918125	7.944482677	8.380211244	8.623249291	8.79239169	8.204119985	8.924279287	8.230448924	0	8.000000004	9.079181246	8.301029998	9.255272505	9.447158031
FLNB	6.431363925	0	6.556302621	7.322219315	7.301030017	7.278753624	7.38021126	7.43136378	7.342422701	7.662757841	7.544068057	7.322219315	7.414973365	7.041392725	7.079181282	6.939519303	7.919078098	7.806179981	7.908485024	7.505149992	7.113943386	7.255272529	7.176091288	6.724275952	6.568201841	7.20412001	7.812913363	7.792391697	7.623249301	7.973127858	7.732393768	7.819543942	7.924279291	7.934498456	8.361727838	7.612783867	7.851258355	7.544068057	8.176091262	8.146128039	8.322219297	8.361727838	7.838849097	0	8.301029998	8.939519253	7.38021126	8.857332497	9
PGK1	6.716003427	6.748188105	6.755874932	7.255272529	7.414973365	7.041392725	7.662757841	7.806179981	7.643452686	7.770852019	7.662757841	7.462398013	7.491361708	7.041392725	7.672097867	7.176091288	8.447158033	8.41497335	8.342422683	7.934498456	7.845098046	7.97772361	8.113943356	7.863322866	7.579783608	8.748188028	8.698970005	8.86923172	8.301029998	8.278753603	8.301029998	8.176091262	8.113943356	8.322219297	8.041392689	8.000000004	8.000000004	8.732393761	8.602059992	9.079181246	8.74036269	9.477121255	8.41497335	0	8.531478918	9.623249291	8.662757833	9.838849091	10.20411998
ASS1	6.903090041	6.740362768	6.623249394	0	7.301030017	0	0	0	0	0	6.633468557	6.380211423	0	0	7.255272529	7.518513953	7.643452686	7.544068057	7.113943386	8.041392689	8.041392689	8.07918125	7.869231726	7.778151258	7.763428001	8.778151251	8.845098041	8.991226076	7.740362697	8.176091262	8.361727838	7.724275878	7.591064618	7.934498456	7.707570185	7.939519258	7.892094608	8.447158033	8.653212515	8.361727838	8.041392689	9.380211242	8.431363766	0	8.041392689	8.41497335	7.838849097	9.812913357	9.380211242
COL1A1	0	0	0	0	0	6.230449177	0	0	0	0	0	0	0	0	0	0	0	0	0	0	0	0	0	0	0	0	0	0	7.041392725	0	0	6.924279338	0	0	0	6.65321261	7.653212523	0	8.301029998	7.97772361	9.041392686	7.869231726	7.20412001	0	7.146128067	0	0	0	0
ALDOA	7.518513953	7.623249301	7.633468466	7.079181282	7.079181282	7.041392725	7.982271238	8.000000004	7.681241246	7.230448947	7.792391697	7.505149992	7.322219315	7.462398013	7.653212523	7.477121269	8.50514998	8.447158033	8.342422683	8.301029998	8.230448924	7.819543942	7.000000043	0	7.20412001	8.176091262	8.361727838	8.322219297	8.000000004	7.880813598	7.924279291	8.806179975	8.716003344	9	9.079181246	8.544068046	7.53147893	7.672097867	0	8.278753603	8.255272508	6.897627146	8.000000004	0	8.544068046	9.653212514	9	9.322219295	9.113943353
GAPDH	7.255272529	7.38021126	7.278753624	7.724275878	7.732393768	7.716003352	8.707570177	8.653212515	8.113943356	8.07918125	7.919078098	7.698970013	8.176091262	8.633468457	8.633468457	8.623249291	9.322219295	9.278753601	9.230448922	8.301029998	8.204119985	8.204119985	8.278753603	8.113943356	8.000000004	9.146128036	9.041392686	9.146128036	8.826074803	9.041392686	8.95424251	8.875061264	9.342422681	8.86923172	8.892094603	8.819543936	8.39794001	9.591064607	9.278753601	9.602059991	9.041392686	9.681241237	8.763427994	7.591064618	9.079181246	10.04139269	9.447158031	10.8920946	11.11394335
ENO1	7.079181282	7.99122608	7.000000043	7.556302513	7.544068057	7.863322866	8.113943356	8.146128039	8.041392689	7.799340556	7.505149992	7.462398013	7.447158047	7.986771739	7.819543942	7.886490731	8.322219297	8.556302502	8.579783598	8.653212515	8.531478918	8.556302502	8.477121256	8.39794001	8.278753603	9.204119983	9.397940009	9.431363764	8.643452677	8.934498452	8.919078093	8.812913357	8.672097859	9.041392686	8.531478918	8.79239169	8.431363766	8.826074803	8.806179975	9.278753601	9.079181246	9.397940009	8.812913357	7.230448947	8.977723606	10	9.176091259	9.770852012	10.11394335
GPI	7.278753624	7.176091288	7.278753624	6.85125841	7.079181282	6.73239384	7.414973365	7.322219315	6.995635238	6.662757926	6.505150114	6.643452775	6.724275952	7.447158047	7.863322866	7.544068057	7.908485024	8.113943356	7.963787832	7.929418931	7.913813858	7.838849097	7.342422701	7.897627097	7.939519258	8.863322861	8.845098041	8.633468457	7.959041397	8.39794001	8.07918125	8.41497335	8.07918125	8.041392689	8.146128039	7.886490731	7.447158047	8.568201725	9.041392686	8.79239169	8.113943356	9.113943353	8.204119985	0	8.361727838	9.041392686	8.230448924	9	8.544068046
TUBB	7.826074809	7.892094608	7.43136378	7.995635199	8.176091262	8.07918125	8.230448924	8.230448924	8.176091262	8.146128039	7.880813598	7.672097867	7.755874863	7.934498456	7.633468466	7.959041397	8.39794001	8.431363766	8.431363766	8.342422683	8.322219297	8.301029998	8.531478918	8.322219297	8.113943356	9.278753601	9.301029996	9.255272505	9.146128036	9.255272505	9.278753601	8.544068046	8.50514998	8.531478918	8.361727838	8.591064608	8.778151251	10.11394335	9.491361694	9.672097858	9.230448922	9.763427994	8.949390007	0	9.146128036	9.672097858	9	10.30103	10.38021124
HSP90AA1	7.556302513	7.869231726	7.892094608	6.968482995	7.732393768	7.43136378	7.690196089	7.672097867	7.707570185	7.681241246	7.724275878	7.361727855	7.43136378	7.361727855	7.414973365	7.612783867	7.963787832	8.041392689	8.000000004	8.591064608	8.544068046	8.544068046	8.431363766	8.322219297	8.204119985	9.176091259	9.204119983	9.230448922	8.857332497	8.944482673	8.959041393	8.86923172	8.851258349	8.778151251	8.897627092	8.643452677	8.447158033	9.079181246	9.079181246	9.322219295	9.041392686	9.447158031	8.662757833	0	8.851258349	9.826074803	9.146128036	9.806179974	10.11394335
THBS1	6.477121399	6.67209795	6.556302621	7.643452686	7.770852019	7.799340556	0	0	6.643452775	0	7.462398013	7.230448947	7.176091288	6.944482722	6.785329906	6.633468557	6.462398148	6.643452775	7.041392725	8.612783858	8.568201725	8.531478918	8.591064608	8.50514998	8.380211244	8.908485019	8.908485019	9.041392686	9.041392686	9.176091259	9.204119983	8.230448924	8.230448924	8.462397999	8.806179975	8.556302502	8.95424251	9.462397998	9.785329835	9.716003344	9.230448922	9.838849091	9.146128036	6.27875383	8.897627092	9.278753601	8.176091262	9.462397998	9.633468456
HSP90AB1	7.612783867	7.869231726	7.913813858	7.414973365	7.43136378	7.591064618	7.924279291	8.000000004	8.041392689	7.826074809	7.602060002	7.544068057	7.491361708	7.505149992	7.707570185	7.397940026	7.845098046	8.07918125	7.963787832	8.591064608	8.544068046	8.544068046	8.477121256	8.342422683	8.230448924	9.146128036	9.146128036	9.278753601	8.973127854	9.041392686	9.079181246	8.959041393	8.838849091	8.74036269	8.924279287	8.591064608	8.447158033	9.079181246	9.041392686	9.301029996	9.041392686	9.447158031	8.623249291	0	8.973127854	9.826074803	9.146128036	9.806179974	10.17609126
LTA4H	6.380211423	6.380211423	6.397940182	7.591064618	7.556302513	5.342424655	7.716003352	7.079181282	0	5.623250324	0	5.591065721	5.255274918	8.07918125	0	8.07918125	6.986771779	7.322219315	0	0	0	0	5.505151335	0	0	7.973127858	7.963787832	7.851258355	0	0	0	6.982271278	0	0	6.431363925	0	8.146128039	0	8.568201725	8.041392689	7.623249301	8.204119985	7.041392725	0	0	8.255272508	0	7.447158047	0
IGF2R	0	0	0	0	0	0	6.568201841	7.041392725	6.518514071	6.812913423	6.819544001	0	0	0	0	0	0	0	0	6.892094658	0	0	7.342422701	0	0	0	7.113943386	7.20412001	7.662757841	7.591064618	7.591064618	7.20412001	7.301030017	7.505149992	7.397940026	7.462398013	6.908485072	7.732393768	8.176091262	7.397940026	0	7.707570185	7.462398013	0	7.342422701	7.716003352	7.146128067	7.612783867	7.707570185
EEF2	7.672097867	7.672097867	7.662757841	7.414973365	7.43136378	7.447158047	7.544068057	7.556302513	7.53147893	7.462398013	7.556302513	7.462398013	7.477121269	7.963787832	7.973127858	7.99122608	7.880813598	7.880813598	7.857332502	7.924279291	7.869231726	8.041392689	8.041392689	8.041392689	7.819543942	8.929418926	8.863322861	8.934498452	8.518513941	8.672097859	8.431363766	8.41497335	8.000000004	8.431363766	8.447158033	8.07918125	8.230448924	9.342422681	8.963787828	9	8.897627092	9.113943353	8.204119985	6.662757926	8.380211244	9.361727836	8.612783858	9.662757832	9.770852012
AKR1A1	0	6.785329906	0	0	0	0	0	6.633468557	0	0	6.623249394	7.146128067	0	8.662757833	0	8.633468457	7.176091288	7.397940026	7.785329842	8.301029998	8.07918125	8.176091262	8.113943356	8.146128039	8.342422683	8.95424251	9	8.973127854	7.806179981	8.176091262	7.792391697	8.113943356	7.447158047	8.041392689	6.908485072	8.204119985	8.07918125	8.690196081	8.832508913	8.612783858	8.230448924	9.230448922	8.113943356	0	7.778151258	8.204119985	7.939519258	8.897627092	8.591064608
PKM	7.785329842	8.041392689	7.812913363	7.623249301	7.662757841	7.653212523	8.431363766	8.431363766	8.477121256	8.255272508	8.230448924	8.113943356	7.949390012	7.913813858	7.939519258	7.949390012	8.612783858	8.591064608	8.579783598	8.39794001	8.301029998	8.322219297	8.568201725	8.204119985	8.07918125	9.204119983	9.204119983	9.204119983	8.982271233	8.973127854	9.361727836	9.301029996	8.447158033	8.748188028	8.857332497	8.643452677	8.146128039	9.301029996	8.770852012	9.322219295	8.924279287	9.278753601	8.591064608	6.838849154	8.819543936	10.04139269	8.875061264	10.39794001	10.90308999
AKR1B1	0	0	0	0	0	0	0	0	0	0	0	0	0	0	0	0	7.568201736	7.612783867	7.447158047	7.785329842	7.812913363	7.748188035	7.672097867	7.591064618	0	8.556302502	8.755874856	8.672097859	7.869231726	8.07918125	8.07918125	7.845098046	8.39794001	8.255272508	7.643452686	8.146128039	7.770852019	8.477121256	8.568201725	8.491361695	8.176091262	8.681241238	7.869231726	0	7.491361708	7.924279291	7.707570185	8.944482673	9.041392686
VCL	6.944482722	6.505150114	0	6.414973515	6.832508977	6.954242558	7.53147893	7.690196089	7.447158047	7.20412001	0	6.568201841	6.531479045	0	7.322219315	0	7.886490731	8.176091262	8.146128039	7.079181282	6.886490782	0	0	0	0	7.447158047	0	7.230448947	7.845098046	7.707570185	7.176091288	7.770852019	7.785329842	7.778151258	7.826074809	7.041392725	7.698970013	7.146128067	7.698970013	8.230448924	8.041392689	0	7.278753624	6.491361834	7.819543942	8.556302502	7.653212523	8.361727838	7.462398013
ACO1	6.633468557	7.361727855	7.079181282	7.462398013	7.322219315	7.342422701	0	0	0	0	7.20412001	6.954242558	7.079181282	7.875061269	7.939519258	6.949390055	7.612783867	7.612783867	7.591064618	7.99122608	8.146128039	8.462397999	8.113943356	7.897627097	7.748188035	8.875061264	8.903089988	8.929418926	8.000000004	8.07918125	8.113943356	7.322219315	7.20412001	7.662757841	7.612783867	7.851258355	8.39794001	8.806179975	9	8.929418926	8.447158033	9.643452677	8.633468457	0	8.230448924	8.806179975	8.176091262	8.819543936	8.838849091
AHCY	8.230448924	8.07918125	8.322219297	7.146128067	7.43136378	7.462398013	6.982271278	6.995635238	6.986771779	6.724275952	7.623249301	7.342422701	7.38021126	7.505149992	7.806179981	7.447158047	7.462398013	7.857332502	7.732393768	8.968482949	8.913813853	8.919078093	9.255272505	9.113943353	9	9.851258349	10.04139269	10.04139269	9.278753601	9.361727836	9.301029996	8.806179975	8.301029998	9	8.707570177	9.113943353	8.544068046	9.113943353	9.204119983	9.342422681	8.732393761	9.929418926	8.74036269	0	8.447158033	9.079181246	8.518513941	9.698970004	9.857332496
PSMA4	0	0	0	0	0	0	0	6.949390055	6.908485072	6.65321261	6.556302621	5.954242992	6.414973515	0	0	0	6.79239176	6.892094658	6.755874932	6.544068168	6.462398148	0	0	6.079181608	0	7.146128067	0	0	0	7.477121269	0	7.255272529	0	6.785329906	7.301030017	6.477121399	0	7.908485024	7.732393768	7.146128067	0	0	7.20412001	6.255272746	7.113943386	8.322219297	7.43136378	8.000000004	0
MAPK1	0	0	0	0	7.544068057	0	7.612783867	0	7.079181282	0	0	7.301030017	6.230449177	7.518513953	7.556302513	8.301029998	6.146128346	7.770852019	7.763428001	7.255272529	7.146128067	7.146128067	7.113943386	0	0	7.863322866	7.838849097	7.740362697	7.20412001	6.643452775	7.278753624	7.986771739	0	6.963787875	6.462398148	0	7.602060002	8.39794001	8.462397999	8.322219297	7.919078098	8.255272508	7.612783867	0	0	7.832508919	7.812913363	8.806179975	8.886490726
BLVRB	0	0	6.414973515	7.176091288	7.176091288	7.176091288	6.785329906	6.913813905	0	0	6.897627146	0	0	7.342422701	7.38021126	7.38021126	7.146128067	6.740362768	7.20412001	7.612783867	7.38021126	7.301030017	7.491361708	7.447158047	7.176091288	8.204119985	8.556302502	8.748188028	7.934498456	8.176091262	6.748188105	7.863322866	7.361727855	7.255272529	7.20412001	7.591064618	7.568201736	8.518513941	8.301029998	0	0	9.041392686	7.778151258	0	7.851258355	8.278753603	7.740362697	8.176091262	8.176091262
GDI1	6.447158186	6.397940182	0	6.707570261	6.886490782	6.982271278	7.146128067	7.041392725	7.397940026	7.146128067	0	0	6.612783963	6.886490782	7.000000043	6.934498502	7.643452686	7.623249301	7.462398013	7.43136378	7.342422701	7.880813598	7.568201736	7.591064618	7.556302513	8.707570177	8.342422683	8.643452677	7.653212523	7.322219315	7.785329842	8.113943356	7.913813858	7.863322866	7.462398013	7.863322866	7.934498456	8.477121256	8.732393761	8.672097859	8.462397999	8.633468457	8.07918125	0	7.959041397	8.875061264	8.322219297	9.041392686	8.826074803
MAT2A	0	6.6020601	6.903090041	0	0	0	0	0	0	0	0	0	0	0	0	0	0	0	0	7.462398013	7.612783867	7.579783608	7.698970013	7.556302513	7.079181282	8.07918125	8.230448924	8.380211244	7.949390012	7.826074809	8.000000004	7.491361708	7.146128067	7.146128067	7.000000043	7.322219315	7.681241246	8.301029998	8.230448924	8.361727838	7.954242514	8.431363766	0	0	0	7.949390012	0	8.602059992	8.732393761
MYH9	6.65321261	6.819544001	6.954242558	7.113943386	7.113943386	7.176091288	7.447158047	7.414973365	7.342422701	7.146128067	6.977723651	6.875061321	6.903090041	7.230448947	7.230448947	7.230448947	7.716003352	7.681241246	7.602060002	8.000000004	7.799340556	7.851258355	7.897627097	7.995635199	7.869231726	8.361727838	8.41497335	8.518513941	8.623249291	8.845098041	8.591064608	8.447158033	8.322219297	8.785329836	8.447158033	8.633468457	7.929418931	8.431363766	8.681241238	8.672097859	8.447158033	8.934498452	8.579783598	0	8.447158033	9.176091259	8.477121256	9.079181246	9.255272505
TAGLN2	7.414973365	7.176091288	7.041392725	7.146128067	7.000000043	6.65321261	7.934498456	7.880813598	7.544068057	7.462398013	6.643452775	0	6.724275952	7.230448947	7.000000043	7.255272529	7.447158047	7.397940026	7.079181282	7.278753624	7.113943386	7.230448947	6.995635238	7.041392725	0	7.732393768	8.361727838	8.278753603	7.602060002	8.204119985	8.041392689	8.41497335	8.322219297	8.113943356	7.397940026	7.826074809	7.963787832	8.531478918	8.763427994	8.74036269	8.518513941	8.662757833	8.204119985	0	8.278753603	9.643452677	8.041392689	9.556302501	9.591064607
GDI2	6.724275952	6.995635238	6.785329906	6.908485072	6.929418977	6.892094658	7.698970013	7.672097867	7.662757841	7.643452686	6.838849154	6.681241328	6.591064718	6.799340618	6.99122612	6.949390055	7.716003352	7.785329842	7.732393768	7.949390012	7.851258355	8.07918125	7.924279291	7.919078098	7.880813598	8.929418926	8.681241238	8.819543936	8.146128039	8.255272508	8.342422683	8.176091262	7.97772361	7.913813858	8.041392689	7.924279291	8.041392689	8.662757833	8.908485019	8.886490726	8.556302502	8.732393761	8.278753603	0	8.204119985	9.041392686	8.568201725	9.113943353	9
PGD	7.556302513	7.477121269	7.43136378	7.740362697	7.716003352	7.826074809	7.462398013	7.477121269	7.176091288	6.982271278	7.361727855	7.322219315	6.886490782	8.041392689	7.763428001	8.07918125	7.612783867	7.662757841	7.653212523	7.755874863	7.732393768	7.785329842	7.929418931	7.778151258	7.662757841	8.568201725	8.50514998	8.662757833	8.07918125	8.07918125	8.07918125	8.579783598	7.568201736	7.342422701	7.255272529	7.579783608	8.176091262	8.361727838	8.491361695	8.322219297	7.755874863	8.934498452	8.113943356	0	8.322219297	8.579783598	7.785329842	9	9.146128036
ADK	0	0	6.67209795	7.041392725	0	0	6.86332292	6.929418977	6.886490782	6.698970091	7.255272529	7.079181282	7.20412001	7.653212523	7.653212523	7.623249301	7.041392725	7.556302513	7.568201736	7.857332502	7.672097867	7.740362697	7.897627097	7.812913363	7.361727855	9	8.477121256	8.863322861	8.041392689	7.949390012	7.748188035	7.602060002	7.079181282	7.041392725	6.544068168	7.763428001	7.707570185	8.41497335	8.568201725	8.556302502	7.724275878	9.414973348	7.770852019	0	7.845098046	8.447158033	7.812913363	8.929418926	9.146128036
TPI1	7.556302513	7.518513953	7.301030017	6.924279338	7.301030017	7.462398013	7.278753624	7.278753624	7.544068057	7.278753624	7.041392725	7.361727855	7.301030017	0	7.397940026	0	8.204119985	8.230448924	8.204119985	7.886490731	7.707570185	7.724275878	8.041392689	8.000000004	7.892094608	8.826074803	8.806179975	8.662757833	8.230448924	8.322219297	8.230448924	8.556302502	8.579783598	8.491361695	8.518513941	8.204119985	8.041392689	8.690196081	8.74036269	9	8.653212515	9.079181246	8.000000004	6.95904144	8.380211244	9.322219295	8.518513941	9.77815125	9.672097858
PSMA6	0	0	0	0	0	0	6.838849154	6.65321261	6.255272746	0	0	0	0	0	0	0	0	0	0	0	0	7.342422701	0	0	0	6.778151323	0	7.568201736	0	7.414973365	7.447158047	7.612783867	0	7.278753624	7.544068057	6.65321261	7.732393768	8.000000004	8.146128039	7.778151258	7.908485024	0	0	6.908485072	7.38021126	7.982271238	7.462398013	7.959041397	0
TUBB4B	7.826074809	7.892094608	7.397940026	7.740362697	7.755874863	8.07918125	8.230448924	8.230448924	8.176091262	8.113943356	7.832508919	7.643452686	7.681241246	7.99122608	7.568201736	7.924279291	8.39794001	8.431363766	8.431363766	8.342422683	8.278753603	8.255272508	8.491361695	8.255272508	8.041392689	9.255272505	9.301029996	9.176091259	9.146128036	9.204119983	9.230448922	8.531478918	8.477121256	8.531478918	8.39794001	8.591064608	8.778151251	10.07918125	9.414973348	9.662757832	9.230448922	9.763427994	8.949390007	0	9.146128036	9.633468456	9	10.30103	10.38021124
CAP1	0	0	0	7.000000043	7.301030017	7.255272529	6.99122612	6.908485072	6.986771779	6.85125841	6.431363925	6.27875383	0	6.908485072	7.146128067	6.99122612	7.176091288	7.146128067	6.67209795	7.653212523	7.477121269	7.414973365	7.53147893	7.662757841	7.602060002	8.146128039	7.939519258	8.07918125	7.732393768	7.806179981	8.07918125	8.431363766	7.740362697	7.944482677	8.322219297	7.763428001	7.681241246	8.230448924	8.380211244	8.431363766	7.462398013	8.39794001	7.949390012	6.9731279	8.000000004	8.826074803	8.07918125	9.397940009	10.04139269
SLC7A5	7.973127858	8.000000004	7.913813858	0	6.568201841	6.763428068	6.477121399	6.447158186	6.544068168	0	6.681241328	6.568201841	6.690196169	7.38021126	0	0	6.361728025	6.662757926	6.462398148	0	7.462398013	7.361727855	7.707570185	7.724275878	0	0	0	0	0	8.07918125	8.000000004	8.278753603	8.623249291	8.342422683	9.255272505	7.653212523	7.845098046	7.819543942	0	7.908485024	7.944482677	0	7.612783867	7.342422701	8.113943356	9.51851394	8.230448924	7.806179981	0
EEF1A2	8.39794001	8.342422683	8.380211244	7.414973365	7.863322866	8.041392689	7.414973365	7.643452686	7.770852019	7.53147893	7.863322866	7.53147893	7.477121269	7.20412001	7.832508919	7.146128067	7.875061269	8.255272508	8.000000004	8.763427994	8.763427994	8.748188028	8.342422683	8.544068046	8.447158033	9.380211242	9.361727836	9.380211242	8.968482949	9.255272505	9.255272505	9.278753601	8.934498452	9.176091259	9.322219295	8.785329836	8.612783858	9.79934055	8.662757833	9.505149978	9.531478917	9.447158031	8.623249291	6.826074868	8.892094603	9.770852012	9.041392686	9.73239376	10.2787536
TRAP1	7.342422701	7.278753624	7.301030017	0	0	0	7.643452686	7.623249301	7.612783867	7.740362697	7.361727855	7.113943386	7.612783867	0	0	0	7.53147893	7.732393768	7.724275878	8.544068046	8.477121256	8.041392689	8.491361695	8.278753603	8.113943356	9.301029996	9.146128036	9.204119983	8.982271233	9	9.041392686	8.838849091	8.690196081	8.672097859	0	8.602059992	8.690196081	9.176091259	9.255272505	9.414973348	9.255272505	9.633468456	8.698970005	0	8.908485019	9.903089987	9.322219295	9.748188027	10.20411998
ILK	6.86332292	6.838849154	6.812913423	0	6.698970091	6.633468557	0	0	0	0	0	0	0	6.73239384	6.643452775	6.447158186	6.819544001	7.041392725	7.041392725	6.755874932	6.361728025	6.556302621	6.763428068	0	6.477121399	7.716003352	7.477121269	7.939519258	7.806179981	7.897627097	8.041392689	7.43136378	7.462398013	7.544068057	7.447158047	7.397940026	7.886490731	8.531478918	8.462397999	8.653212515	8.146128039	8.531478918	7.903089992	0	8.041392689	8.278753603	6.505150114	8.278753603	8.278753603
TUBB3	7.698970013	7.556302513	7.255272529	7.819543942	7.845098046	7.255272529	8.07918125	8.146128039	8.113943356	8.041392689	7.763428001	7.568201736	7.643452686	7.414973365	7.38021126	7.38021126	8.113943356	8.176091262	8.230448924	8.230448924	8.176091262	8.113943356	8.342422683	8.07918125	7.806179981	9.255272505	9.278753601	9.204119983	9.146128036	9.255272505	9.278753601	8.477121256	8.361727838	8.361727838	7.643452686	8.544068046	8.612783858	10.07918125	9.462397998	9.591064607	9.230448922	9.591064607	8.591064608	0	8.991226076	9.653212514	8.897627092	10.25527251	10.32221929
COTL1	0	0	0	7.230448947	7.176091288	0	7.491361708	7.447158047	7.414973365	7.477121269	7.176091288	6.939519303	6.949390055	6.591064718	6.579783711	6.518514071	7.342422701	6.968482995	7.113943386	7.397940026	6.763428068	7.301030017	6.301030213	0	5.832509551	0	7.623249301	6.643452775	7.778151258	8.07918125	0	0	7.863322866	7.623249301	8.301029998	7.623249301	7.799340556	8.041392689	8.568201725	8.431363766	7.869231726	8.39794001	8.176091262	0	8.113943356	9	7.949390012	7.113943386	8.477121256
FLNC	0	0	0	7.301030017	7.301030017	7.255272529	7.53147893	7.505149992	7.462398013	7.662757841	7.544068057	7.322219315	7.414973365	7.146128067	7.146128067	7.146128067	7.681241246	7.079181282	7.53147893	7.447158047	7.176091288	7.20412001	7.176091288	6.724275952	6.568201841	7.255272529	7.785329842	7.908485024	7.556302513	8.000000004	7.832508919	7.819543942	7.924279291	7.924279291	8.342422683	7.698970013	7.851258355	7.113943386	8.176091262	8.113943356	8.431363766	8.361727838	8.000000004	0	7.672097867	8.944482673	7.505149992	8.819543936	8.939519253
PTGES3	6.380211423	6.322219502	6.255272746	0	0	0	0	6.908485072	6.86332292	7.113943386	0	6.85125841	0	6.892094658	6.908485072	6.880813649	7.176091288	7.322219315	7.322219315	7.20412001	7.041392725	7.20412001	6.73239384	7.041392725	6.79239176	8.041392689	7.929418931	8.041392689	7.755874863	7.690196089	7.973127858	7.851258355	7.591064618	7.949390012	7.568201736	7.716003352	7.505149992	8.732393761	7.886490731	8.255272508	7.949390012	8.591064608	7.612783867	0	7.869231726	8.74036269	8.041392689	9.322219295	9.414973348
TUBA1C	7.602060002	7.579783608	7.591064618	8.146128039	8.041392689	8.041392689	8.41497335	8.380211244	8.41497335	8.322219297	7.934498456	7.929418931	7.949390012	8.07918125	8.113943356	8.204119985	8.531478918	8.447158033	8.531478918	8.531478918	8.477121256	8.462397999	8.698970005	8.579783598	8.431363766	9.255272505	9.255272505	9.322219295	9.278753601	9.361727836	9.397940009	8.944482673	8.806179975	8.591064608	8.544068046	8.939519253	9	10.23044892	9.505149978	9.851258349	9.322219295	9.72427587	9.322219295	7.477121269	9.230448922	9.72427587	9.113943353	10.30103	10.462398
TUBB6	7.716003352	7.544068057	7.255272529	7.079181282	6.99122612	7.079181282	8.113943356	7.973127858	8.07918125	7.875061269	7.544068057	7.414973365	7.447158047	7.113943386	6.924279338	7.113943386	8.301029998	8.322219297	8.301029998	8.113943356	8.000000004	8.041392689	8.278753603	8.041392689	7.755874863	9.041392686	9	8.919078093	9.041392686	8.949390007	8.995635195	8.39794001	8.07918125	8.342422683	7.20412001	8.301029998	8.698970005	10	9.397940009	9.653212514	9.176091259	9.579783597	8.763427994	0	8.949390007	9.612783857	8.908485019	10.11394335	10.30103
PSMD13	0	0	0	7.000000043	6.939519303	6.944482722	7.785329842	7.838849097	7.662757841	0	6.86332292	6.968482995	6.982271278	7.934498456	7.806179981	7.633468466	6.73239384	7.462398013	7.579783608	0	0	6.963787875	5.806180653	5.740363479	5.690196966	7.653212523	7.690196089	7.672097867	7.518513953	7.447158047	7.322219315	6.982271278	0	6.857332557	6.73239384	0	7.778151258	8.623249291	8.447158033	8.204119985	7.612783867	8.462397999	7.623249301	0	7.724275878	8.113943356	7.301030017	8.819543936	8.748188028
RAP1B	7.041392725	6.643452775	6.740362768	7.477121269	7.477121269	6.301030213	7.973127858	7.959041397	8.041392689	7.806179981	7.447158047	6.95904144	7.342422701	6.230449177	7.146128067	7.414973365	7.146128067	8.531478918	8.230448924	7.924279291	7.792391697	7.819543942	7.568201736	7.414973365	7.230448947	8.146128039	8.50514998	8.462397999	8.556302502	8.556302502	8.278753603	8.230448924	8.41497335	7.851258355	7.799340556	8.07918125	8.431363766	7.897627097	7.278753624	8.913813853	9	9.079181246	8.176091262	0	8.924279287	9.477121255	8.95424251	8.982271233	8.95424251
COL1A2	0	0	0	0	0	0	0	0	0	0	0	0	0	0	0	0	0	0	0	0	0	0	0	0	0	0	0	0	7.38021126	0	0	7.681241246	0	0	6.491361834	0	6.968482995	0	7.826074809	0	8.698970005	8.176091262	7.322219315	0	6.897627146	7.447158047	0	0	0
LDHB	7.612783867	7.623249301	7.662757841	7.579783608	7.361727855	6.919078145	7.973127858	7.995635199	8.255272508	7.812913363	7.462398013	7.462398013	7.230448947	8.041392689	7.982271238	8.462397999	8.278753603	8.477121256	8.531478918	8.707570177	8.612783858	8.623249291	8.176091262	8.41497335	8.255272508	9.079181246	9.176091259	9.146128036	8.342422683	8.591064608	8.301029998	8.924279287	8.531478918	8.579783598	8.447158033	8.431363766	8.204119985	8.568201725	8.944482673	8.819543936	8.50514998	9.51851394	8.301029998	0	8.230448924	9.342422681	8.892094603	9.079181246	8.826074803
MYL6	7.462398013	7.322219315	7.342422701	0	0	0	7.43136378	7.53147893	7.477121269	7.38021126	6.724275952	6.491361834	6.518514071	6.954242558	6.819544001	6.929418977	7.53147893	7.633468466	7.612783867	6.204120254	6.892094658	6.462398148	6.880813649	0	6.176091549	7.851258355	7.707570185	6.86332292	8.278753603	7.748188035	8.041392689	8.556302502	8.462397999	8.72427587	8.462397999	8.380211244	7.397940026	8.361727838	7.806179981	8.633468457	8.230448924	8.041392689	7.845098046	0	7.99122608	9.079181246	8.544068046	9.079181246	9.361727836
CLIC1	6.591064718	7.146128067	7.113943386	7.491361708	7.491361708	7.491361708	8.491361695	8.544068046	8.518513941	8.431363766	7.924279291	7.812913363	7.845098046	7.176091288	7.623249301	7.568201736	8.146128039	8.50514998	8.39794001	8.07918125	8.041392689	8.041392689	7.041392725	6.716003427	6.857332557	8.301029998	8.477121256	8.361727838	7.963787832	8.041392689	7.924279291	8.732393761	8.886490726	8.623249291	8.633468457	8.380211244	7.681241246	8.41497335	8.556302502	9.204119983	8.662757833	8.342422683	7.880813598	0	8.623249291	9.591064607	8.949390007	9.612783857	9.69019608
ACTN4	6.690196169	7.146128067	7.176091288	7.146128067	7.20412001	7.079181282	8.278753603	8.146128039	8.176091262	8.07918125	7.230448947	7.278753624	7.113943386	7.322219315	7.113943386	7.491361708	8.146128039	7.934498456	8.204119985	7.322219315	7.000000043	7.255272529	6.623249394	0	0	7.591064618	7.414973365	7.278753624	7.38021126	7.53147893	7.612783867	8.146128039	8.301029998	8.447158033	8.602059992	7.897627097	7.447158047	8.230448924	8.322219297	8.643452677	8.653212515	8.146128039	7.897627097	0	8.361727838	9.380211242	8.832508913	8.518513941	8.301029998
LDHA	7.342422701	7.361727855	7.301030017	7.698970013	7.698970013	7.653212523	8.041392689	8.255272508	8.176091262	7.995635199	7.763428001	7.322219315	7.38021126	7.963787832	8.07918125	7.857332502	8.462397999	8.568201725	8.556302502	8.544068046	8.491361695	8.462397999	8.041392689	8.176091262	8.041392689	8.995635195	8.95424251	9.041392686	7.97772361	8.230448924	8.301029998	8.755874856	8.770852012	8.698970005	8.903089988	8.278753603	8.176091262	8.204119985	8.230448924	9.113943353	8.778151251	9.204119983	7.968482953	7.322219315	8.653212515	9.544068044	9	9.447158031	9.041392686
ITGB1	7.462398013	7.556302513	7.38021126	7.278753624	7.53147893	7.556302513	9.113943353	9.204119983	9.113943353	8.897627092	8.278753603	8.000000004	8.146128039	7.707570185	6.778151323	6.591064718	7.707570185	7.518513953	7.505149992	7.672097867	7.838849097	7.770852019	7.278753624	0	0	7.97772361	7.799340556	8.204119985	7.959041397	8.041392689	8.000000004	8.556302502	8.819543936	8.886490726	8.86923172	8.602059992	7.97772361	7.792391697	0	9.491361694	9.146128036	8.07918125	8.301029998	7.724275878	9.146128036	10.07918125	8.612783858	8.770852012	0
ENO2	0	0	7.462398013	7.491361708	7.414973365	7.38021126	7.255272529	7.20412001	7.278753624	6.770852085	7.146128067	0	6.176091549	7.662757841	7.716003352	7.707570185	7.505149992	7.690196089	7.672097867	7.322219315	7.255272529	6.755874932	7.278753624	7.230448947	7.301030017	8.690196081	8.623249291	8.72427587	7.230448947	7.602060002	7.863322866	6.397940182	7.949390012	7.255272529	6.995635238	7.301030017	7.832508919	0	8.322219297	7.995635199	8.204119985	8.41497335	8.146128039	7.447158047	8.278753603	8.986771735	8.146128039	8.732393761	9.301029996
COL6A3	0	0	0	7.079181282	7.079181282	6.892094658	0	0	0	0	0	0	0	0	0	0	0	0	0	7.146128067	7.477121269	7.079181282	7.079181282	6.770852085	6.716003427	7.505149992	7.602060002	7.763428001	7.799340556	7.897627097	7.959041397	6.86332292	6.556302621	6.880813649	6.633468557	7.38021126	7.785329842	7.973127858	9.531478917	8.531478918	7.986771739	8.74036269	7.707570185	0	7.518513953	7.819543942	0	8.113943356	8.903089988
ACTN1	6.568201841	6.690196169	6.707570261	7.041392725	7.113943386	7.079181282	8.113943356	8.113943356	8.07918125	7.982271238	7.041392725	6.908485072	6.880813649	7.414973365	7.322219315	6.716003427	7.949390012	7.919078098	8.113943356	7.322219315	7.000000043	7.255272529	6.623249394	0	0	7.591064618	7.414973365	7.278753624	7.414973365	7.53147893	7.623249301	7.959041397	8.278753603	8.41497335	8.477121256	7.770852019	7.447158047	8.230448924	8.322219297	8.633468457	8.653212515	8.146128039	7.897627097	0	8.361727838	9.380211242	8.832508913	8.462397999	8.301029998
UBA1	0	0	0	7.20412001	7.20412001	7.146128067	6.819544001	6.977723651	6.908485072	7.041392725	6.977723651	6.623249394	6.778151323	7.806179981	7.968482953	8.041392689	7.397940026	7.477121269	7.322219315	7.681241246	7.707570185	7.602060002	7.851258355	7.662757841	7.556302513	8.698970005	8.623249291	8.643452677	8.000000004	7.982271238	8.041392689	7.732393768	7.176091288	7.851258355	7.568201736	7.707570185	7.778151258	8.518513941	8.662757833	8.602059992	7.732393768	9.041392686	7.963787832	6.919078145	7.892094608	8.662757833	7.838849097	9.643452677	9.462397998
MYH10	0	0	0	0	0	0	7.113943386	6.944482722	7.113943386	6.799340618	6.740362768	6.65321261	6.579783711	0	0	0	7.079181282	6.95904144	6.934498502	7.505149992	7.414973365	7.414973365	7.903089992	7.748188035	7.763428001	8.301029998	8.255272508	8.591064608	8.662757833	8.653212515	8.39794001	8.301029998	8.176091262	8.39794001	8.176091262	8.322219297	7.568201736	7.897627097	8.230448924	8.322219297	8.146128039	8.602059992	8.204119985	0	8.113943356	8.934498452	8.39794001	9	9.146128036
PGM1	7.397940026	7.556302513	7.505149992	7.079181282	7.146128067	6.826074868	6.892094658	7.176091288	6.230449177	0	6.886490782	6.968482995	6.826074868	7.949390012	6.342422878	7.908485024	7.672097867	7.38021126	7.707570185	7.929418931	7.806179981	7.568201736	8.000000004	7.826074809	7.361727855	8.74036269	8.72427587	8.716003344	7.959041397	8.07918125	7.845098046	7.732393768	0	7.462398013	7.53147893	7.681241246	7.880813598	8.342422683	8.477121256	8.462397999	7.477121269	8.959041393	8.113943356	0	7.716003352	7.934498456	7.477121269	8.447158033	8.491361695
ACLY	6.698970091	6.716003427	6.633468557	7.146128067	7.041392725	7.079181282	7.146128067	7.146128067	7.041392725	6.924279338	7.079181282	6.934498502	6.623249394	7.20412001	7.230448947	7.505149992	6.880813649	6.763428068	6.886490782	7.602060002	7.397940026	7.462398013	7.113943386	6.477121399	6.414973515	8.000000004	7.995635199	7.869231726	7.732393768	7.778151258	7.806179981	7.414973365	7.079181282	7.929418931	7.491361708	7.748188035	7.643452686	8.447158033	8.230448924	8.518513941	7.97772361	8.633468457	7.724275878	6.857332557	7.491361708	8.322219297	7.53147893	8.39794001	8.342422683
VCP	0	6.431363925	6.414973515	7.255272529	6.531479045	6.806180042	6.643452775	6.579783711	6.505150114	0	0	0	0	0	6.892094658	7.041392725	6.778151323	6.778151323	6.716003427	6.9731279	6.000000434	5.986772182	0	0	0	7.579783608	7.255272529	7.146128067	6.908485072	6.986771779	0	8.041392689	7.278753624	7.716003352	7.770852019	6.491361834	7.113943386	7.838849097	7.838849097	8.568201725	8.146128039	8.041392689	6.826074868	0	7.397940026	8.230448924	7.653212523	9.602059991	9.079181246
EIF4A1	6.740362768	6.716003427	6.6020601	7.079181282	7.079181282	7.322219315	7.146128067	7.176091288	7.113943386	7.079181282	7.43136378	7.230448947	7.342422701	7.230448947	7.38021126	7.342422701	7.505149992	7.53147893	7.544068057	7.875061269	7.838849097	7.681241246	7.799340556	7.770852019	7.568201736	8.447158033	8.623249291	8.653212515	8.07918125	8.278753603	8.113943356	7.919078098	7.778151258	7.959041397	8.113943356	7.763428001	7.845098046	8.633468457	7.863322866	8.568201725	8.361727838	8.826074803	7.954242514	7.38021126	8.07918125	8.763427994	8.176091262	9.531478917	9.74036269
RHOA	7.278753624	7.20412001	7.361727855	7.176091288	7.041392725	7.041392725	7.968482953	7.982271238	7.959041397	7.740362697	7.672097867	7.462398013	7.505149992	7.556302513	7.556302513	7.477121269	7.944482677	7.462398013	7.857332502	7.755874863	7.707570185	7.707570185	0	7.361727855	7.342422701	8.176091262	7.826074809	8.230448924	7.579783608	8.204119985	8.113943356	8.477121256	8.431363766	8.322219297	8.447158033	8.07918125	7.924279291	7.698970013	0	8.591064608	8.74036269	8.041392689	7.897627097	0	8.447158033	9.505149978	8.770852012	9.230448922	9.041392686
TPM4	0	0	6.73239384	0	0	0	7.38021126	7.113943386	6.929418977	7.146128067	0	0	0	0	0	0	7.20412001	7.255272529	7.255272529	0	7.230448947	0	0	0	0	0	0	0	0	7.851258355	7.785329842	7.755874863	7.869231726	8.041392689	8.230448924	0	0	0	0	0	8.176091262	0	0	0	7.982271238	8.763427994	8.591064608	8.431363766	0
PSMD2	6.6020601	6.73239384	6.724275952	7.146128067	7.176091288	6.9731279	7.079181282	7.278753624	6.591064718	6.000000434	6.431363925	6.939519303	6.361728025	7.477121269	7.342422701	7.20412001	6.86332292	6.819544001	7.079181282	6.86332292	0	0	0	0	0	7.491361708	7.785329842	7.643452686	7.716003352	7.176091288	7.491361708	8.000000004	7.20412001	7.892094608	7.707570185	7.477121269	0	8.361727838	7.995635199	8.041392689	7.361727855	8.07918125	6.977723651	0	7.43136378	8.000000004	7.146128067	8.763427994	8.863322861
PDCD6IP	7.568201736	7.230448947	7.176091288	7.176091288	0	6.919078145	7.591064618	7.568201736	7.518513953	7.477121269	7.579783608	7.505149992	7.53147893	6.698970091	0	6.724275952	7.447158047	7.568201736	7.491361708	7.934498456	8.000000004	8.000000004	8.146128039	8.07918125	7.892094608	8.857332497	8.892094603	8.913813853	8.544068046	8.591064608	8.556302502	8.431363766	8.176091262	8.146128039	8.832508913	8.204119985	8.602059992	8.556302502	8.041392689	8.929418926	9.176091259	8.41497335	8.146128039	0	7.892094608	8.949390007	9.146128036	8.79239169	8.812913357
PCYOX1	0	0	0	0	0	0	7.278753624	7.278753624	7.230448947	7.000000043	7.230448947	7.146128067	6.944482722	0	0	0	6.491361834	6.447158186	0	0	0	0	0	0	0	0	0	0	0	0	0	6.643452775	6.612783963	0	0	0	0	0	0	0	0	0	0	0	7.477121269	0	0	0	0
CLIC4	6.826074868	0	0	6.939519303	6.770852085	6.886490782	7.544068057	7.53147893	7.462398013	7.38021126	7.301030017	7.079181282	7.176091288	7.000000043	6.799340618	7.079181282	7.97772361	7.97772361	7.949390012	7.643452686	7.799340556	7.518513953	6.95904144	7.724275878	7.681241246	8.113943356	8.07918125	8.113943356	7.278753624	7.698970013	7.505149992	7.886490731	7.919078098	7.38021126	7.698970013	7.079181282	7.477121269	6.880813649	8.07918125	8.556302502	8.113943356	8.361727838	7.643452686	0	7.924279291	8.963787828	8.41497335	8.301029998	8.886490726
CD9	7.53147893	7.672097867	7.518513953	0	6.662757926	7.897627097	8.301029998	7.792391697	8.255272508	8.41497335	7.633468466	7.681241246	6.799340618	7.477121269	7.43136378	7.491361708	0	0	0	7.230448947	7.397940026	7.740362697	0	0	0	8.204119985	7.875061269	8.342422683	7.462398013	8.041392689	0	8.50514998	9.079181246	8.176091262	8.322219297	8.531478918	7.505149992	9.204119983	8.041392689	9.361727836	8.591064608	7.707570185	8.322219297	0	8.886490726	10.04139269	0	9.716003344	0
CAPZB	0	0	0	8.041392689	7.505149992	7.97772361	6.740362768	6.886490782	6.748188105	6.462398148	7.176091288	0	0	7.869231726	6.531479045	8.146128039	6.812913423	7.755874863	7.146128067	0	7.322219315	7.43136378	0	0	0	7.414973365	7.518513953	7.544068057	7.230448947	7.342422701	7.322219315	7.643452686	7.491361708	7.929418931	7.763428001	7.462398013	6.995635238	6.986771779	7.397940026	7.954242514	8.041392689	0	0	0	7.672097867	8.544068046	7.954242514	8.39794001	8.959041393
ACTR3	0	0	0	0	6.518514071	6.531479045	7.662757841	6.934498502	7.556302513	6.913813905	7.278753624	6.86332292	6.67209795	5.949390495	8.146128039	6.832508977	7.278753624	7.414973365	7.301030017	6.869231778	6.977723651	0	0	0	5.041396633	7.602060002	7.892094608	7.880813598	7.755874863	7.633468466	7.301030017	7.113943386	7.397940026	7.255272529	7.505149992	7.113943386	7.518513953	8.113943356	8.50514998	8.000000004	8.041392689	8.255272508	7.397940026	0	7.556302513	8.826074803	7.845098046	8.748188028	9.342422681
ARHGDIB	0	0	0	0	0	0	0	0	0	0	0	0	0	0	0	0	0	0	0	0	0	0	0	0	0	0	0	0	0	0	0	0	0	0	7.278753624	0	0	0	0	7.591064618	0	0	0	0	6.838849154	0	0	7.934498456	0
FABP5	0	0	0	0	0	0	6.897627146	6.79239176	6.845098102	6.903090041	0	0	0	0	0	0	6.579783711	0	6.643452775	7.079181282	0	7.041392725	0	0	0	6.491361834	7.819543942	7.963787832	0	7.716003352	7.662757841	0	6.908485072	7.662757841	7.414973365	0	0	0	0	0	7.544068057	0	7.477121269	6.954242558	0	8.447158033	8.113943356	10.11394335	7.544068057
ITGA6	0	0	0	7.146128067	7.176091288	7.278753624	8.278753603	8.255272508	8.278753603	8.176091262	7.995635199	7.826074809	7.812913363	6.612783963	6.662757926	6.579783711	6.477121399	6.531479045	6.531479045	6.763428068	6.832508977	6.755874932	0	0	0	0	0	0	0	7.079181282	6.826074868	7.462398013	8.491361695	7.908485024	8.518513941	8.07918125	0	0	0	9	8.322219297	7.447158047	0	6.204120254	9	9.544068044	7.230448947	8.903089988	0
SLC9A3R1	7.255272529	7.255272529	7.079181282	0	0	0	0	0	0	0	7.041392725	6.806180042	0	0	0	0	6.799340618	6.740362768	6.819544001	0	0	0	0	0	0	0	0	0	0	0	0	7.869231726	8.204119985	7.698970013	7.763428001	7.579783608	0	0	0	0	0	0	0	0	7.623249301	8.79934055	8.230448924	7.623249301	0
ARPC1B	6.27875383	6.342422878	6.322219502	0	0	0	0	7.38021126	0	0	7.43136378	7.38021126	0	0	0	0	6.518514071	6.897627146	0	0	0	0	0	0	0	7.518513953	0	0	0	0	0	7.301030017	7.230448947	7.255272529	7.568201736	0	0	7.99122608	0	0	7.397940026	0	7.361727855	0	6.707570261	8.176091262	7.278753624	8.50514998	9.079181246
ARPC2	6.869231778	6.869231778	0	6.255272746	6.113943686	6.113943686	0	0	0	0	0	0	6.86332292	6.982271278	6.477121399	7.113943386	6.301030213	6.85125841	6.380211423	0	7.041392725	7.000000043	0	0	0	7.591064618	7.755874863	7.770852019	0	7.278753624	6.95904144	7.477121269	7.146128067	7.53147893	7.462398013	0	0	7.322219315	0	0	0	7.602060002	0	0	7.491361708	8.556302502	7.612783867	8.380211244	8.838849091
ARPC3	0	0	0	0	0	0	0	6.869231778	0	6.857332557	0	0	0	0	0	0	6.986771779	6.924279338	6.934498502	6.544068168	6.477121399	6.397940182	0	6.04139308	0	7.278753624	7.041392725	7.361727855	7.041392725	0	6.897627146	7.146128067	7.322219315	7.819543942	7.778151258	6.591064718	0	8.041392689	0	8.146128039	7.963787832	7.690196089	0	0	7.612783867	8.255272508	7.763428001	8.531478918	9.079181246
ARPC5	0	0	0	0	0	0	6.204120254	6.65321261	6.662757926	0	0	0	0	0	0	0	6.342422878	6.505150114	6.380211423	0	0	0	0	0	6.832508977	7.826074809	7.806179981	7.908485024	0	0	0	0	0	7.579783608	7.662757841	0	0	0	0	7.812913363	7.892094608	7.662757841	0	0	0	8.07918125	6.939519303	8.230448924	7.414973365
PNP	0	0	0	0	0	0	6.9731279	6.939519303	6.79239176	6.85125841	6.447158186	6.414973515	0	0	0	0	6.740362768	6.763428068	0	6.892094658	0	0	0	0	0	7.857332502	7.97772361	7.959041397	7.662757841	7.361727855	7.643452686	7.255272529	6.740362768	6.462398148	6.633468557	7.322219315	7.491361708	8.041392689	8.301029998	8.278753603	7.982271238	8.531478918	7.623249301	6.079181608	7.53147893	8.518513941	6.939519303	8.000000004	8.113943356
CAT	0	0	0	0	0	6.556302621	0	0	0	0	6.886490782	6.505150114	6.431363925	0	0	0	0	0	0	7.707570185	7.662757841	7.556302513	7.863322866	8.041392689	0	8.146128039	8.556302502	8.579783598	8.07918125	8.041392689	7.919078098	0	7.361727855	7.886490731	7.698970013	7.838849097	7.146128067	0	8.041392689	6.995635238	0	8.477121256	0	7.342422701	0	7.681241246	7.000000043	8.301029998	8.380211244
ANXA1	0	0	0	7.505149992	7.491361708	7.462398013	8.322219297	8.301029998	8.255272508	8.176091262	7.812913363	7.662757841	7.732393768	7.079181282	6.819544001	6.869231778	8.518513941	8.491361695	8.447158033	5.707571028	0	0	0	0	0	0	0	0	6.875061321	0	0	8.230448924	8.748188028	8.602059992	8.113943356	8.07918125	7.53147893	0	0	9.342422681	8.643452677	0	7.799340556	0	9.113943353	9.672097858	8.230448924	10.07918125	0
CAPNS1	0	0	0	0	0	0	6.301030213	6.6020601	6.176091549	6.556302621	0	0	6.380211423	0	0	0	6.67209795	6.763428068	6.832508977	0	0	0	0	0	6.643452775	7.146128067	6.939519303	6.612783963	7.041392725	0	6.397940182	7.662757841	7.301030017	7.579783608	7.491361708	0	7.079181282	7.397940026	7.892094608	7.869231726	7.602060002	7.681241246	6.716003427	0	7.113943386	8.39794001	7.146128067	8.278753603	8.146128039
GSTP1	0	0	0	0	0	0	7.146128067	7.462398013	7.38021126	7.255272529	7.301030017	7.278753624	7.462398013	7.361727855	6.740362768	7.278753624	7.690196089	7.322219315	7.770852019	7.886490731	7.716003352	7.806179981	8.041392689	7.724275878	7.770852019	8.826074803	8.778151251	8.838849091	7.38021126	8.301029998	8.278753603	8.662757833	8.301029998	8.342422683	8.322219297	7.99122608	7.146128067	7.924279291	8.322219297	8.380211244	7.698970013	8.875061264	8.113943356	0	8.255272508	9.230448922	8.79239169	9.886490725	9.662757832
CNP	0	0	6.380211423	0	7.079181282	0	7.939519258	7.982271238	7.869231726	7.623249301	6.690196169	0	6.86332292	7.568201736	7.579783608	7.591064618	7.491361708	7.959041397	7.838849097	0	0	7.53147893	0	0	0	7.568201736	7.20412001	7.505149992	7.38021126	7.361727855	7.041392725	7.491361708	8.000000004	7.924279291	8.000000004	7.176091288	7.20412001	8.982271233	0	8.301029998	7.880813598	7.633468466	7.623249301	0	7.973127858	8.949390007	8.342422683	7.934498456	6.95904144
TXN	7.447158047	7.38021126	7.361727855	0	0	0	7.43136378	7.740362697	7.301030017	7.491361708	7.447158047	7.255272529	7.20412001	0	6.623249394	0	7.278753624	7.397940026	6.079181608	0	0	0	7.568201736	0	0	7.602060002	0	0	8.278753603	8.146128039	8.146128039	8.770852012	8.204119985	8.041392689	7.748188035	7.414973365	0	0	0	8.146128039	7.447158047	0	8.113943356	8.07918125	8.897627092	9.301029996	8.176091262	8.863322861	8.72427587
PRKAR1A	0	0	0	0	0	0	0	0	0	0	0	0	0	0	0	0	0	6.204120254	6.491361834	0	0	0	7.20412001	0	0	7.397940026	0	7.662757841	6.447158186	0	0	7.447158047	0	7.113943386	0	0	0	0	7.929418931	7.892094608	0	8.07918125	0	0	7.079181282	7.792391697	7.643452686	8.278753603	8.72427587
RALB	7.041392725	7.041392725	7.462398013	0	0	0	7.662757841	7.763428001	7.755874863	7.505149992	7.146128067	6.85125841	7.230448947	7.397940026	7.230448947	6.968482995	7.462398013	7.38021126	7.361727855	0	0	0	0	0	0	7.591064618	7.079181282	7.43136378	7.53147893	7.612783867	7.53147893	7.38021126	8.462397999	8.041392689	7.462398013	7.568201736	6.85125841	7.38021126	0	7.414973365	7.959041397	0	0	7.732393768	8.447158033	9.505149978	7.963787832	8.579783598	0
LCP1	0	0	0	0	0	0	0	7.113943386	0	7.146128067	0	0	0	0	0	0	0	0	0	0	6.518514071	0	0	0	0	0	0	0	0	0	0	7.361727855	7.544068057	7.681241246	8.113943356	7.414973365	0	0	0	0	0	7.949390012	7.278753624	0	7.623249301	8.95424251	7.724275878	8.255272508	8.176091262
PLS3	0	0	0	0	6.934498502	6.963787875	6.6020601	7.255272529	7.255272529	7.146128067	7.041392725	6.690196169	6.826074868	0	6.79239176	6.690196169	7.079181282	7.079181282	7.000000043	6.681241328	6.462398148	6.785329906	0	0	0	6.924279338	7.20412001	7.477121269	0	0	0	7.602060002	7.869231726	7.832508919	8.361727838	7.414973365	7.255272529	0	0	7.982271238	7.863322866	8.113943356	7.079181282	0	7.462398013	8.939519253	7.690196089	8.176091262	8.146128039
NT5E	0	0	0	7.322219315	7.477121269	7.568201736	8.000000004	7.982271238	8.07918125	8.041392689	7.342422701	7.230448947	7.462398013	0	6.724275952	0	6.176091549	6.255272746	0	0	0	0	0	0	0	0	7.079181282	0	0	0	7.322219315	0	8.39794001	8.07918125	8.72427587	7.041392725	7.53147893	0	0	9.322219295	8.707570177	0	8.230448924	5.826075451	8.939519253	9.77815125	8.176091262	0	0
S100A4	0	0	0	0	0	0	0	0	0	0	0	0	0	0	0	0	7.886490731	8.176091262	7.579783608	0	0	0	0	0	0	0	0	0	0	0	0	0	0	0	0	0	0	0	0	8.602059992	0	0	0	0	0	0	0	0	0
TKT	0	0	0	6.591064718	6.544068168	6.6020601	6.892094658	7.113943386	7.146128067	7.146128067	0	7.079181282	6.869231778	7.462398013	7.322219315	7.447158047	7.113943386	6.826074868	7.113943386	0	0	0	0	6.000000434	0	7.851258355	7.278753624	7.43136378	7.079181282	7.653212523	7.633468466	7.778151258	7.568201736	8.07918125	7.43136378	7.623249301	7.176091288	7.568201736	7.579783608	7.799340556	7.255272529	7.755874863	7.146128067	0	7.869231726	8.568201725	7.919078098	8.908485019	8.897627092
GNA11	6.707570261	6.67209795	6.623249394	0	0	6.113943686	7.079181282	6.838849154	6.949390055	6.85125841	0	0	0	6.748188105	6.079181608	0	7.447158047	7.623249301	7.255272529	7.041392725	0	0	7.041392725	0	0	0	7.397940026	0	7.491361708	7.462398013	7.707570185	7.633468466	7.826074809	7.812913363	7.690196089	7.230448947	7.113943386	0	0	8.230448924	8.041392689	0	0	0	7.826074809	8.857332497	7.863322866	7.806179981	0
PRDX5	0	0	0	0	0	0	7.041392725	7.000000043	7.230448947	6.785329906	6.875061321	6.845098102	7.041392725	0	0	0	7.146128067	6.968482995	7.041392725	0	0	0	0	0	0	7.477121269	6.462398148	7.462398013	6.707570261	0	0	7.477121269	7.20412001	6.462398148	7.447158047	0	0	7.838849097	0	0	7.949390012	7.568201736	6.886490782	0	7.919078098	8.447158033	7.845098046	8.778151251	8.748188028
SERPINB1	0	0	0	0	0	0	0	7.146128067	7.146128067	7.079181282	0	6.785329906	6.892094658	6.623249394	6.6020601	6.612783963	7.230448947	6.963787875	7.041392725	0	0	0	0	0	0	0	0	0	0	0	0	7.041392725	6.740362768	7.176091288	7.38021126	0	0	0	0	7.612783867	0	0	0	6.73239384	7.43136378	8.113943356	0	7.892094608	0
CORO1A	0	0	7.146128067	0	0	0	0	0	0	0	0	0	0	0	7.146128067	7.079181282	6.301030213	6.755874932	6.880813649	7.612783867	7.623249301	7.579783608	7.518513953	7.278753624	7.000000043	8.278753603	8.41497335	8.50514998	7.716003352	7.886490731	7.740362697	7.826074809	7.113943386	7.954242514	6.995635238	8.50514998	7.43136378	8.556302502	0	8.07918125	7.322219315	8.50514998	7.255272529	0	6.342422878	8.000000004	0	8.770852012	9.477121255
BSG	6.556302621	6.785329906	6.79239176	0	0	0	7.414973365	7.491361708	7.041392725	7.255272529	6.929418977	6.785329906	6.875061321	7.414973365	0	0	6.763428068	7.079181282	6.67209795	8.255272508	8.39794001	7.38021126	0	6.95904144	6.963787875	8.230448924	8.204119985	7.986771739	7.99122608	7.949390012	7.939519258	8.672097859	8.447158033	8.230448924	8.462397999	7.681241246	0	0	0	8.623249291	8.278753603	0	0	0	8.041392689	9.819543936	7.477121269	8.79934055	0
VASP	6.6020601	0	0	0	0	0	6.806180042	6.690196169	6.6020601	0	0	0	0	0	0	0	0	0	0	6.643452775	0	0	0	0	7.113943386	7.278753624	7.477121269	7.591064618	7.20412001	7.707570185	7.38021126	7.146128067	7.690196089	0	7.806179981	7.255272529	7.000000043	7.897627097	7.602060002	7.892094608	7.643452686	8.230448924	7.447158047	0	7.414973365	8.278753603	7.505149992	7.986771739	8.477121256
RAB5C	7.146128067	6.785329906	7.230448947	0	6.301030213	6.397940182	7.43136378	7.414973365	7.477121269	7.462398013	7.176091288	6.924279338	6.934498502	6.146128346	0	0	7.146128067	7.278753624	7.230448947	7.633468466	7.342422701	7.633468466	7.230448947	7.20412001	7.20412001	7.832508919	7.230448947	7.954242514	7.447158047	7.53147893	7.681241246	7.770852019	7.806179981	7.477121269	7.633468466	7.544068057	7.568201736	8.301029998	0	8.380211244	8.544068046	8.50514998	7.556302513	0	8.113943356	8.949390007	8.278753603	9	8.924279287
ARHGDIA	0	0	0	0	0	0	6.146128346	0	0	6.897627146	0	0	0	0	0	0	6.924279338	6.819544001	7.113943386	0	0	0	0	0	6.544068168	8.146128039	7.924279291	8.07918125	8.146128039	7.763428001	6.770852085	7.944482677	7.973127858	7.113943386	7.995635199	7.176091288	0	0	0	8.301029998	7.934498456	8.204119985	0	0	0	8.845098041	8.230448924	8.041392689	0
CAPZA1	6.204120254	0	6.176091549	6.322219502	6.361728025	6.301030213	7.176091288	7.301030017	7.301030017	0	0	0	0	6.85125841	6.544068168	6.913813905	7.342422701	7.591064618	7.38021126	7.176091288	7.342422701	7.342422701	0	6.982271278	0	7.653212523	7.397940026	7.792391697	7.763428001	7.462398013	7.544068057	7.770852019	7.681241246	7.38021126	7.568201736	7.397940026	0	8.041392689	8.000000004	8.278753603	8.041392689	7.934498456	0	0	7.491361708	8.763427994	8.113943356	8.491361695	8.949390007
CDC42	7.832508919	7.949390012	7.949390012	7.832508919	0	0	8.041392689	8.07918125	7.447158047	7.785329842	7.176091288	7.255272529	7.716003352	7.491361708	7.602060002	6.591064718	7.799340556	8.041392689	7.863322866	0	0	6.880813649	7.579783608	8.000000004	7.38021126	8.176091262	8.255272508	7.939519258	7.53147893	7.897627097	8.204119985	8.146128039	8.176091262	8.113943356	8.176091262	7.897627097	7.903089992	7.799340556	0	8.447158033	7.770852019	7.99122608	7.53147893	0	8.39794001	9.602059991	8.568201725	9.230448922	9.113943353
DSTN	7.041392725	7.278753624	7.322219315	6.995635238	6.986771779	6.982271278	7.146128067	7.690196089	7.544068057	6.939519303	7.53147893	7.041392725	6.579783711	7.361727855	7.38021126	7.361727855	7.255272529	7.230448947	7.278753624	7.20412001	7.146128067	7.113943386	7.301030017	0	6.9731279	7.812913363	7.785329842	0	7.755874863	7.556302513	7.477121269	8.204119985	8.785329836	8.361727838	7.806179981	7.875061269	7.20412001	8.322219297	0	7.863322866	8.000000004	8.041392689	7.819543942	0	8.230448924	9.361727836	8.322219297	8.908485019	9.041392686
ACTR2	0	0	0	7.832508919	7.568201736	7.556302513	6.934498502	6.85125841	6.785329906	6.79239176	7.38021126	7.322219315	7.146128067	6.544068168	8.146128039	8.146128039	7.819543942	7.851258355	7.653212523	0	0	0	6.977723651	0	0	7.845098046	7.732393768	7.944482677	0	7.397940026	7.505149992	7.38021126	7.505149992	7.505149992	7.301030017	7.176091288	6.740362768	8.278753603	0	8.07918125	7.845098046	7.949390012	7.113943386	0	7.462398013	8.662757833	7.778151258	8.778151251	9.230448922
RHOG	0	0	0	6.812913423	6.85125841	6.869231778	6.85125841	7.146128067	7.079181282	7.113943386	6.85125841	0	6.67209795	0	0	0	6.919078145	7.041392725	6.204120254	7.079181282	6.897627146	7.113943386	0	0	5.869232307	7.361727855	0	7.880813598	0	0	0	7.342422701	7.623249301	7.662757841	7.968482953	7.113943386	7.041392725	0	0	8.146128039	8.113943356	0	7.113943386	0	7.505149992	8.897627092	7.949390012	8.903089988	8.732393761
PSME1	0	5.85125896	0	6.986771779	0	6.707570261	7.43136378	7.698970013	7.361727855	6.763428068	7.041392725	7.176091288	6.86332292	7.342422701	0	0	6.778151323	7.000000043	6.806180042	0	0	0	0	0	0	0	6.361728025	0	0	0	0	6.977723651	6.812913423	7.000000043	7.342422701	6.255272746	6.662757926	7.491361708	0	7.653212523	0	7.698970013	0	0	7.397940026	8.491361695	7.491361708	8.146128039	8.204119985
LASP1	0	0	0	0	0	0	7.041392725	6.908485072	6.819544001	7.041392725	0	0	0	0	0	0	6.954242558	6.934498502	7.041392725	0	0	0	0	0	0	0	0	0	0	0	0	0	7.623249301	6.812913423	7.770852019	0	0	0	0	0	0	0	0	0	7.414973365	8.278753603	6.544068168	0	7.939519258
ZYX	0	0	0	6.414973515	0	6.079181608	0	0	0	0	0	0	0	0	0	0	0	6.954242558	0	0	0	0	0	0	0	0	0	0	0	0	0	0	7.113943386	7.724275878	7.643452686	0	0	0	0	7.079181282	6.799340618	0	0	0	0	7.146128067	0	0	7.322219315
TWF2	0	0	0	0	0	0	0	0	0	0	0	0	0	0	0	0	0	0	0	0	0	0	0	0	0	0	0	0	0	0	0	7.176091288	0	0	0	0	0	0	7.230448947	0	0	0	0	0	6.748188105	7.748188035	7.079181282	0	8.113943356
CYFIP1	7.278753624	7.255272529	7.591064618	0	0	0	7.544068057	7.544068057	7.568201736	7.342422701	7.146128067	6.544068168	6.778151323	6.681241328	6.832508977	6.826074868	7.491361708	7.278753624	7.462398013	7.278753624	7.255272529	7.079181282	6.204120254	0	0	7.342422701	7.176091288	7.544068057	6.531479045	7.255272529	6.763428068	7.623249301	8.176091262	7.698970013	7.556302513	7.633468466	7.732393768	7.602060002	7.968482953	7.968482953	8.000000004	7.924279291	0	0	7.748188035	8.72427587	7.903089992	8.431363766	8.763427994
ARPC1A	0	0	0	0	0	0	0	7.38021126	0	0	7.43136378	7.38021126	0	0	0	0	0	0	0	6.740362768	6.770852085	0	0	0	0	7.43136378	7.230448947	7.897627097	0	0	0	6.79239176	0	0	7.041392725	0	0	6.763428068	0	0	7.491361708	7.968482953	7.361727855	0	6.716003427	8.176091262	6.857332557	8.707570177	8.74036269
CNN2	0	0	0	0	0	0	0	0	0	0	0	0	0	0	0	0	7.342422701	7.322219315	0	0	0	0	0	0	0	0	0	0	0	0	0	7.301030017	0	6.79239176	6.301030213	0	0	0	0	0	0	0	0	0	0	0	7.278753624	0	0
PARK7	7.041392725	6.968482995	7.079181282	6.819544001	0	6.73239384	0	7.361727855	7.20412001	6.986771779	0	0	0	7.000000043	7.113943386	7.041392725	6.477121399	6.518514071	7.041392725	0	7.20412001	0	0	0	0	7.113943386	0	7.113943386	7.255272529	0	7.792391697	7.518513953	7.477121269	7.653212523	7.322219315	6.6020601	0	8.07918125	0	8.255272508	0	0	6.944482722	0	7.361727855	8.591064608	7.954242514	7.662757841	0
SH3BGRL3	0	0	0	0	0	0	0	6.633468557	6.591064718	0	0	0	0	0	0	0	0	6.662757926	6.6020601	0	0	0	0	0	0	0	0	0	0	0	0	0	0	0	0	0	0	0	0	0	0	0	0	0	0	7.505149992	7.43136378	7.939519258	0
CORO1C	0	0	0	6.986771779	7.041392725	7.041392725	0	0	0	6.73239384	6.612783963	0	0	0	6.707570261	0	7.653212523	7.662757841	7.623249301	7.462398013	7.176091288	7.113943386	7.653212523	6.79239176	7.113943386	8.531478918	8.518513941	8.568201725	7.857332502	7.886490731	7.99122608	7.929418931	7.342422701	7.954242514	8.000000004	7.832508919	7.414973365	7.869231726	7.908485024	8.322219297	7.518513953	8.41497335	0	0	7.602060002	8.755874856	7.908485024	8.602059992	8.72427587
SRI	7.556302513	7.568201736	7.505149992	0	0	0	7.230448947	7.146128067	7.20412001	7.000000043	7.000000043	6.812913423	7.176091288	0	0	0	6.643452775	0	6.707570261	6.806180042	6.255272746	7.20412001	7.361727855	6.204120254	5.919078616	7.491361708	0	7.20412001	7.397940026	7.462398013	7.623249301	8.113943356	7.869231726	8.146128039	8.000000004	7.732393768	7.000000043	0	0	7.462398013	7.20412001	0	7.447158047	0	7.886490731	8.146128039	7.785329842	9.431363764	8.41497335
CYCS	0	0	0	0	0	0	0	0	0	0	0	6.447158186	6.491361834	0	0	0	0	6.477121399	0	0	0	0	0	0	0	0	0	0	0	0	0	0	0	0	0	0	0	0	0	0	0	0	0	0	6.531479045	0	6.778151323	0	0
EIF4E	0	0	0	0	0	0	0	0	0	0	0	0	0	0	0	0	7.041392725	7.079181282	0	0	0	0	0	0	0	7.38021126	7.447158047	7.505149992	5.968483416	6.740362768	0	0	0	5.954242992	6.875061321	0	7.176091288	7.079181282	7.681241246	7.556302513	7.544068057	8.041392689	0	0	7.361727855	8.176091262	7.612783867	8.812913357	9.113943353
HNRNPH1	0	0	0	0	0	0	0	0	0	0	0	0	0	0	0	0	0	0	0	0	0	6.146128346	0	7.20412001	0	7.707570185	7.612783867	7.633468466	7.851258355	7.690196089	7.716003352	7.43136378	0	6.944482722	5.397941746	0	6.544068168	8.643452677	7.602060002	0	7.612783867	7.556302513	0	0	6.977723651	7.176091288	0	8.477121256	9.079181246
MYO1B	7.20412001	7.230448947	7.176091288	0	0	0	7.447158047	7.414973365	7.397940026	7.20412001	0	7.342422701	7.556302513	7.579783608	7.591064618	7.230448947	7.146128067	7.819543942	7.544068057	0	0	0	0	0	0	7.477121269	7.505149992	7.544068057	7.544068057	7.591064618	7.322219315	8.342422683	8.380211244	8.301029998	8.477121256	8.041392689	0	8.176091262	0	7.591064618	7.301030017	0	6.95904144	0	8.579783598	9.176091259	8.146128039	8.176091262	0
GANAB	0	0	0	6.204120254	0	0	8.230448924	8.204119985	8.176091262	8.041392689	8.342422683	8.230448924	8.278753603	6.740362768	6.568201841	7.43136378	7.43136378	7.518513953	7.361727855	0	0	0	0	0	0	7.633468466	7.342422701	7.505149992	6.778151323	0	6.968482995	7.806179981	7.623249301	0	6.633468557	0	6.662757926	7.806179981	7.934498456	7.716003352	0	8.278753603	6.949390055	0	7.748188035	7.863322866	7.230448947	8.633468457	8.447158033
NPEPPS	0	0	0	0	0	0	7.113943386	7.176091288	6.929418977	5.929419437	6.04139308	6.845098102	6.812913423	0	6.568201841	0	6.361728025	6.763428068	6.623249394	0	0	6.9731279	6.6020601	6.929418977	6.897627146	7.903089992	7.681241246	7.963787832	0	0	7.20412001	7.477121269	7.146128067	6.963787875	7.079181282	6.963787875	7.000000043	7.778151258	8.176091262	8.000000004	7.38021126	8.113943356	6.95904144	0	7.397940026	8.380211244	7.414973365	8.380211244	8.477121256
NAP1L1	7.230448947	0	0	6.724275952	6.698970091	6.698970091	6.662757926	6.623249394	6.531479045	6.531479045	0	0	0	7.447158047	6.491361834	6.462398148	7.278753624	7.322219315	7.301030017	6.785329906	6.785329906	6.819544001	6.845098102	6.431363925	7.322219315	7.544068057	8.041392689	7.672097867	8.041392689	8.041392689	7.982271238	7.806179981	7.568201736	7.568201736	7.623249301	7.146128067	7.38021126	8.255272508	8.342422683	8.322219297	8.000000004	8.518513941	7.681241246	0	7.732393768	8.755874856	7.959041397	9.176091259	9.079181246
NACA	0	0	0	0	0	0	0	0	0	0	0	0	0	0	0	0	0	0	0	0	0	0	0	0	0	0	0	0	0	7.230448947	6.838849154	0	7.000000043	7.301030017	7.361727855	0	0	0	0	7.995635199	7.568201736	0	0	0	7.397940026	8.07918125	7.041392725	8.531478918	7.897627097
PSMA3	0	0	0	0	0	0	0	0	0	0	0	0	0	0	0	0	0	0	0	0	0	0	0	0	0	7.342422701	0	7.518513953	0	0	0	7.505149992	0	0	7.462398013	0	0	0	0	0	0	0	0	0	7.414973365	8.204119985	7.505149992	8.041392689	7.342422701
HDLBP	0	0	0	0	0	0	0	0	0	0	0	0	0	0	0	6.908485072	0	0	0	0	0	0	0	7.38021126	0	0	0	0	0	0	0	0	0	0	0	0	0	0	0	0	0	0	0	0	0	0	6.477121399	7.832508919	8.176091262
P4HB	0	0	0	0	0	0	8.653212515	8.672097859	8.612783858	8.491361695	8.531478918	8.39794001	8.431363766	0	0	0	7.544068057	7.53147893	7.612783867	0	0	0	0	0	0	7.230448947	7.000000043	6.897627146	7.079181282	0	0	8.204119985	8.176091262	7.579783608	6.361728025	7.690196089	6.67209795	7.568201736	7.716003352	7.748188035	0	7.518513953	0	0	8.462397999	8.113943356	7.462398013	8.544068046	8.431363766
RPS3	0	0	0	0	0	0	6.968482995	6.982271278	6.963787875	6.690196169	0	0	7.041392725	7.278753624	7.301030017	0	7.20412001	7.322219315	6.826074868	0	0	0	0	0	0	7.20412001	7.53147893	7.255272529	6.95904144	0	7.602060002	7.278753624	7.079181282	6.342422878	7.041392725	0	0	8.819543936	0	7.477121269	7.897627097	0	0	0	7.681241246	8.176091262	0	9.041392686	9.041392686
CCT8	0	0	0	7.176091288	7.230448947	7.230448947	6.826074868	0	6.431363925	0	6.707570261	0	6.556302621	6.929418977	0	7.462398013	7.278753624	7.000000043	7.041392725	0	6.799340618	0	0	0	0	7.908485024	7.982271238	8.176091262	7.000000043	7.113943386	7.897627097	7.447158047	6.908485072	6.707570261	7.806179981	0	7.505149992	8.230448924	7.959041397	7.812913363	8.041392689	7.892094608	0	0	7.342422701	8.361727838	7.778151258	9.113943353	8.819543936
DDX5	0	0	0	0	0	0	0	0	0	0	6.755874932	6.491361834	6.531479045	6.255272746	0	0	0	0	0	0	0	0	0	0	0	0	0	7.255272529	6.447158186	6.886490782	0	6.913813905	6.230449177	0	0	0	0	8.230448924	0	7.591064618	0	0	0	0	0	0	7.079181282	8.903089988	9.041392686
PSMB3	0	0	0	0	0	0	6.505150114	6.698970091	6.662757926	6.176091549	0	0	0	0	0	0	0	0	0	7.146128067	7.041392725	0	0	0	0	0	0	0	0	6.690196169	0	7.43136378	0	0	7.799340556	0	0	7.845098046	7.785329842	7.397940026	7.20412001	7.041392725	6.778151323	0	7.414973365	7.322219315	7.556302513	0	0
PPL	0	0	0	0	0	0	0	0	0	0	0	0	0	0	0	0	0	0	0	0	0	0	0	0	0	0	0	0	0	0	0	0	7.176091288	0	7.799340556	0	0	0	0	0	0	0	0	0	6.65321261	0	0	0	0
PDLIM1	0	0	0	0	0	0	6.740362768	6.79239176	0	0	0	0	0	0	0	0	0	0	0	0	0	0	7.230448947	0	0	0	0	0	0	0	0	0	6.85125841	8.041392689	7.838849097	0	0	0	0	7.361727855	7.477121269	0	6.85125841	0	6.869231778	8.000000004	7.361727855	7.748188035	7.518513953
MYO1C	7.53147893	7.43136378	7.568201736	6.65321261	6.67209795	7.146128067	7.826074809	7.799340556	7.732393768	7.414973365	7.602060002	7.278753624	7.322219315	6.698970091	6.944482722	6.707570261	7.863322866	7.886490731	8.146128039	0	0	0	0	0	0	0	0	0	0	0	0	8.39794001	8.431363766	8.255272508	7.447158047	8.230448924	7.230448947	7.963787832	0	8.431363766	8.568201725	0	6.944482722	0	8.07918125	8.982271233	8.41497335	8.041392689	7.662757841
PSMD12	0	0	0	7.146128067	7.113943386	7.146128067	0	6.447158186	0	0	6.95904144	6.491361834	6.755874932	7.146128067	7.000000043	7.041392725	6.86332292	6.99122612	7.079181282	6.724275952	6.832508977	6.740362768	6.623249394	6.230449177	6.531479045	7.38021126	6.812913423	7.53147893	7.113943386	7.518513953	7.414973365	7.146128067	6.544068168	5.301032167	7.000000043	0	7.079181282	8.176091262	7.929418931	7.913813858	7.633468466	8.146128039	7.38021126	0	7.397940026	7.53147893	7.113943386	8.716003344	8.748188028
PSMA7	6.462398148	6.477121399	0	0	0	0	0	6.591064718	6.447158186	0	0	6.361728025	0	0	0	0	0	0	6.6020601	0	6.770852085	0	0	0	0	7.568201736	0	7.662757841	6.799340618	7.000000043	0	7.43136378	6.591064718	0	7.397940026	6.924279338	7.079181282	8.07918125	8.041392689	7.986771739	7.740362697	0	0	0	7.38021126	8.230448924	7.568201736	8.255272508	0
XPO1	0	0	0	6.431363925	6.462398148	0	7.000000043	0	0	6.04139308	6.342422878	0	6.716003427	7.041392725	0	6.806180042	6.079181608	6.944482722	6.812913423	0	5.982271685	0	0	0	0	7.633468466	7.38021126	7.623249301	7.041392725	0	7.079181282	7.079181282	0	6.361728025	6.146128346	6.778151323	7.146128067	8.07918125	7.886490731	7.959041397	7.397940026	7.97772361	0	0	7.176091288	8.380211244	7.176091288	8.662757833	9.041392686
PFAS	0	0	0	0	7.146128067	0	0	0	0	0	0	5.963788299	5.778151974	7.146128067	7.041392725	6.380211423	0	6.414973515	0	6.361728025	0	7.146128067	6.995635238	7.176091288	6.612783963	7.763428001	7.662757841	7.863322866	7.414973365	0	7.301030017	7.000000043	6.491361834	6.806180042	6.301030213	6.986771779	0	7.832508919	7.875061269	7.690196089	0	8.342422683	7.301030017	0	0	7.778151258	6.869231778	0	8.322219297
EIF3H	0	0	0	0	0	0	0	0	0	0	0	0	0	0	0	0	0	0	0	0	0	0	0	0	0	0	0	0	0	0	0	0	0	0	0	0	0	0	0	0	0	0	0	0	0	0	6.838849154	8.462397999	8.591064608
TXNL1	0	0	0	0	0	0	0	0	0	0	0	0	0	0	0	0	0	0	0	0	0	0	0	0	0	0	0	0	0	0	0	0	6.447158186	0	6.748188105	0	0	0	0	0	0	7.301030017	0	0	0	0	0	8.518513941	8.000000004
UGDH	6.869231778	6.903090041	6.838849154	6.740362768	6.85125841	6.785329906	7.724275878	7.740362697	7.707570185	7.568201736	7.255272529	7.000000043	7.113943386	7.462398013	7.579783608	7.591064618	7.230448947	7.146128067	7.113943386	7.643452686	7.602060002	7.477121269	7.959041397	7.845098046	7.806179981	8.698970005	8.748188028	8.826074803	7.919078098	7.462398013	7.477121269	8.322219297	7.995635199	7.43136378	6.518514071	7.792391697	7.698970013	8.826074803	8.322219297	8.146128039	7.880813598	9.041392686	7.869231726	0	8.301029998	8.653212515	7.491361708	9.079181246	8.845098041
PDCD6	6.875061321	6.826074868	6.924279338	0	0	0	7.681241246	7.623249301	7.681241246	7.602060002	6.785329906	7.176091288	7.146128067	0	0	6.544068168	6.99122612	6.799340618	7.000000043	7.414973365	7.230448947	7.146128067	6.414973515	6.414973515	6.113943686	7.806179981	7.633468466	7.732393768	7.447158047	7.863322866	7.806179981	8.07918125	8.204119985	7.707570185	7.97772361	7.954242514	7.770852019	8.342422683	0	8.041392689	8.255272508	8.431363766	8.041392689	0	8.301029998	8.806179975	8.819543936	9.079181246	7.892094608
VPS26A	0	0	0	0	0	0	0	0	0	6.755874932	0	0	0	0	0	6.875061321	0	6.255272746	6.255272746	0	0	0	0	0	0	0	6.690196169	6.770852085	0	6.643452775	0	6.908485072	0	0	6.869231778	0	0	0	0	0	0	0	0	0	6.977723651	7.929418931	7.342422701	8.380211244	8.544068046
IDH1	6.230449177	0	0	0	0	0	6.707570261	6.86332292	6.755874932	6.414973515	7.041392725	0	0	7.146128067	7.176091288	7.176091288	6.845098102	6.591064718	6.939519303	7.53147893	7.591064618	7.602060002	6.919078145	7.041392725	0	7.97772361	7.568201736	7.740362697	7.447158047	7.230448947	7.477121269	8.322219297	8.000000004	7.716003352	7.230448947	7.397940026	7.113943386	7.763428001	8.041392689	7.732393768	7.806179981	8.612783858	7.301030017	0	7.799340556	8.518513941	8.041392689	8.07918125	7.322219315
PGLS	0	0	0	0	6.431363925	0	0	0	0	6.230449177	0	6.176091549	6.431363925	0	0	7.322219315	0	0	0	0	0	0	0	0	0	8.146128039	8.176091262	7.568201736	6.612783963	0	0	7.079181282	0	6.591064718	5.531480194	6.591064718	7.113943386	0	0	7.623249301	0	8.07918125	0	0	7.255272529	0	7.681241246	8.447158033	8.204119985
IPO7	0	0	0	7.447158047	7.447158047	0	7.278753624	0	0	0	6.897627146	6.361728025	6.748188105	7.079181282	7.230448947	7.113943386	0	6.875061321	7.176091288	0	0	0	7.556302513	0	0	7.778151258	7.38021126	7.672097867	6.869231778	7.43136378	7.041392725	7.301030017	0	6.9731279	7.672097867	6.949390055	0	7.612783867	8.000000004	7.633468466	6.838849154	7.880813598	6.892094658	0	7.000000043	8.342422683	7.491361708	8.39794001	8.806179975
AP2A1	6.86332292	6.832508977	6.939519303	6.255272746	0	0	6.929418977	7.079181282	6.556302621	6.748188105	6.579783711	6.812913423	5.84509866	0	0	6.079181608	6.949390055	7.20412001	7.041392725	0	0	5.977724062	0	0	0	0	0	0	0	7.079181282	0	6.518514071	7.612783867	5.934498956	6.73239384	6.698970091	7.079181282	7.38021126	7.763428001	7.845098046	7.838849097	0	0	0	7.732393768	8.544068046	7.255272529	8.778151251	8.991226076
DDAH2	0	0	0	0	0	0	7.113943386	7.397940026	7.146128067	0	0	0	0	0	6.397940182	0	0	0	0	7.000000043	6.806180042	6.724275952	7.255272529	6.919078145	6.230449177	0	0	7.724275878	0	7.255272529	0	0	6.806180042	0	0	0	6.531479045	0	0	0	7.908485024	7.897627097	0	0	0	7.568201736	7.322219315	8.146128039	8.322219297
HPRT1	0	0	0	0	0	0	0	0	0	6.591064718	0	0	0	0	6.322219502	6.361728025	6.6020601	7.000000043	6.845098102	6.342422878	6.27875383	0	0	0	0	0	0	0	0	0	0	7.079181282	7.041392725	0	6.643452775	0	0	0	0	0	7.732393768	8.041392689	0	0	0	0	7.20412001	8.278753603	7.963787832
LMNA	0	0	0	0	0	0	0	0	0	0	0	0	0	0	0	0	0	0	0	0	0	0	0	0	0	0	0	0	0	0	0	6.806180042	0	7.698970013	6.897627146	0	0	0	0	0	7.176091288	0	0	0	7.230448947	7.643452686	7.146128067	8.255272508	0
HSPB1	7.000000043	7.113943386	7.20412001	0	0	0	7.301030017	7.414973365	7.230448947	0	7.079181282	7.176091288	0	0	0	0	7.903089992	7.949390012	7.880813598	7.176091288	7.041392725	7.041392725	7.38021126	0	6.342422878	7.602060002	7.845098046	8.041392689	7.556302513	7.845098046	6.799340618	7.851258355	7.518513953	8.568201725	7.041392725	7.633468466	0	10.07918125	8.491361695	0	0	8.361727838	7.785329842	0	7.826074809	9.041392686	8.612783858	10.34242268	9.556302501
RPN1	0	0	0	0	0	0	8.176091262	8.491361695	8.431363766	7.672097867	8.431363766	8.255272508	8.462397999	0	0	0	6.785329906	6.531479045	7.113943386	0	0	0	0	0	0	6.204120254	0	0	0	0	0	8.146128039	7.716003352	7.176091288	6.929418977	7.785329842	0	0	0	0	7.278753624	0	0	0	7.845098046	0	6.929418977	0	0
RPN2	0	0	0	0	0	0	8.477121256	8.763427994	8.301029998	8.204119985	8.518513941	8.431363766	8.41497335	6.73239384	0	0	7.301030017	0	7.20412001	0	0	0	0	0	0	0	0	0	0	0	0	7.653212523	7.491361708	6.944482722	6.579783711	6.99122612	0	0	0	0	0	0	0	0	7.732393768	0	6.146128346	0	0
SLC25A5	0	0	0	6.812913423	6.79239176	6.785329906	7.255272529	7.322219315	6.763428068	7.176091288	7.919078098	7.397940026	7.612783867	0	6.462398148	6.491361834	7.897627097	7.919078098	7.944482677	0	0	0	0	0	0	7.146128067	0	0	0	0	0	7.623249301	8.000000004	7.806179981	7.591064618	7.954242514	0	0	0	0	7.763428001	0	7.342422701	0	7.602060002	7.662757841	7.612783867	7.763428001	0
EIF2S1	0	0	0	0	0	0	0	0	0	0	0	0	0	6.612783963	6.806180042	6.6020601	6.67209795	6.491361834	6.544068168	0	7.301030017	0	0	0	0	7.518513953	7.447158047	0	0	0	0	7.322219315	7.544068057	7.602060002	7.230448947	0	0	7.785329842	0	0	0	0	0	0	6.812913423	8.113943356	6.963787875	8.778151251	8.863322861
PYGL	6.633468557	6.681241328	6.681241328	7.041392725	7.113943386	6.995635238	7.278753624	7.342422701	7.301030017	7.255272529	6.886490782	6.477121399	6.643452775	6.6020601	7.397940026	7.301030017	7.176091288	7.397940026	7.38021126	7.792391697	7.826074809	7.763428001	7.944482677	7.643452686	7.462398013	8.681241238	8.633468457	8.690196081	8.000000004	8.113943356	8.204119985	7.477121269	7.113943386	7.845098046	7.785329842	7.681241246	8.000000004	8.431363766	8.857332497	8.690196081	8.301029998	9.230448922	8.230448924	0	8.000000004	8.770852012	7.748188035	8.903089988	9.361727836
CAPN1	0	0	6.146128346	0	0	0	7.146128067	6.9731279	7.079181282	7.041392725	7.20412001	7.000000043	7.20412001	6.612783963	6.579783711	6.531479045	7.230448947	7.322219315	7.255272529	0	0	0	0	0	0	0	0	0	0	0	0	6.99122612	7.38021126	7.041392725	7.653212523	7.000000043	0	7.913813858	0	0	0	0	0	0	7.698970013	8.113943356	7.361727855	7.995635199	0
VIM	0	6.869231778	7.041392725	7.176091288	7.113943386	7.20412001	7.662757841	7.672097867	7.623249301	7.602060002	0	0	0	0	0	0	0	0	0	7.041392725	6.963787875	0	0	0	0	7.770852019	0	0	7.544068057	7.819543942	7.959041397	8.431363766	0	8.113943356	0	8.176091262	7.53147893	7.301030017	0	8.919078093	8.579783598	7.973127858	6.826074868	8.531478918	7.633468466	8.07918125	8.113943356	9.278753601	9.113943353
ANXA5	7.763428001	7.863322866	7.770852019	8.113943356	6.875061321	7.113943386	8.146128039	8.778151251	8.146128039	8.041392689	7.397940026	7.113943386	7.230448947	6.770852085	0	0	7.43136378	7.38021126	7.322219315	7.568201736	7.491361708	7.568201736	6.623249394	0	0	7.681241246	7.255272529	7.832508919	7.973127858	8.041392689	8.204119985	8.278753603	8.39794001	8.322219297	7.740362697	8.000000004	8.041392689	8.176091262	7.863322866	9.414973348	8.875061264	7.602060002	7.662757841	0	8.690196081	9.255272505	9.113943353	9.342422681	8.826074803
ANXA4	6.748188105	6.880813649	6.85125841	0	0	0	8.924279287	9.113943353	8.986771735	8.707570177	8.301029998	8.230448924	8.447158033	7.38021126	7.000000043	6.995635238	6.662757926	6.812913423	6.748188105	6.778151323	6.230449177	6.204120254	0	0	0	0	0	0	7.342422701	7.568201736	7.556302513	7.857332502	7.986771739	7.591064618	7.230448947	7.643452686	7.556302513	8.000000004	0	8.176091262	8.041392689	0	0	0	8.041392689	8.113943356	7.908485024	9.462397998	8.342422683
HSPD1	0	0	0	7.447158047	7.43136378	7.230448947	7.612783867	7.579783608	7.43136378	7.301030017	8.113943356	8.000000004	7.982271238	7.812913363	7.770852019	7.892094608	8.322219297	8.477121256	8.447158033	0	0	0	0	0	0	0	7.301030017	7.176091288	0	6.6020601	7.255272529	8.113943356	7.954242514	7.491361708	7.361727855	8.07918125	0	0	0	6.556302621	7.612783867	0	7.342422701	0	8.146128039	7.612783867	7.414973365	8.204119985	8.255272508
PYGB	6.591064718	0	0	6.79239176	6.579783711	6.763428068	7.770852019	7.763428001	7.643452686	7.491361708	6.176091549	6.079181608	6.462398148	6.748188105	7.20412001	7.176091288	7.041392725	7.397940026	7.38021126	7.681241246	7.623249301	7.681241246	7.880813598	7.612783867	7.414973365	8.531478918	8.544068046	8.518513941	7.838849097	7.491361708	7.880813598	7.361727855	6.913813905	7.851258355	7.799340556	7.903089992	7.959041397	8.322219297	8.748188028	8.623249291	8.301029998	9.079181246	8.146128039	0	7.908485024	8.838849091	7.707570185	8.95424251	9.397940009
LAMP1	0	6.414973515	0	0	0	6.799340618	7.113943386	8.041392689	7.939519258	7.913813858	7.826074809	7.698970013	7.724275878	0	0	0	7.826074809	6.897627146	7.778151258	6.176091549	6.079181608	0	0	0	0	7.397940026	7.819543942	7.20412001	0	0	0	7.662757841	7.748188035	7.491361708	6.838849154	7.732393768	0	0	0	8.491361695	0	0	0	0	7.322219315	0	8.278753603	8.07918125	0
G6PD	0	6.934498502	6.826074868	6.869231778	6.880813649	6.875061321	7.690196089	7.505149992	7.414973365	7.278753624	7.079181282	0	7.146128067	7.623249301	0	7.041392725	6.806180042	7.041392725	6.591064718	0	7.079181282	7.113943386	6.230449177	0	0	0	7.681241246	7.544068057	0	7.255272529	7.301030017	8.832508913	8.39794001	8.255272508	7.740362697	8.146128039	7.146128067	8.653212515	8.322219297	7.845098046	0	8.113943356	7.832508919	0	8.544068046	8.977723606	7.845098046	8.770852012	8.623249291
MTHFD1	6.929418977	6.968482995	6.662757926	0	6.968482995	0	6.86332292	6.85125841	6.73239384	6.633468557	6.67209795	6.447158186	6.531479045	7.079181282	7.690196089	7.079181282	6.623249394	7.041392725	6.763428068	7.602060002	7.322219315	7.477121269	7.740362697	7.505149992	7.38021126	8.531478918	8.361727838	8.556302502	7.875061269	7.857332502	7.99122608	8.000000004	7.146128067	8.204119985	7.892094608	7.462398013	7.518513953	8.845098041	7.806179981	8.230448924	7.113943386	8.785329836	0	0	7.612783867	8.518513941	7.886490731	8.919078093	8.568201725
PABPC1	0	0	0	0	0	6.799340618	6.67209795	6.99122612	6.812913423	0	0	0	0	7.255272529	7.230448947	6.755874932	7.113943386	7.079181282	7.000000043	6.929418977	6.880813649	6.806180042	7.176091288	6.544068168	6.491361834	8.113943356	8.146128039	8.204119985	8.278753603	8.41497335	8.380211244	7.491361708	6.908485072	7.342422701	7.301030017	7.113943386	7.361727855	8.462397999	8.041392689	8.301029998	8.880813593	8.39794001	7.518513953	0	7.53147893	8.531478918	7.505149992	8.681241238	8.919078093
SLC25A6	0	0	0	0	0	0	7.255272529	7.322219315	6.763428068	7.176091288	7.716003352	7.447158047	7.662757841	0	0	0	7.806179981	7.919078098	7.892094608	0	0	0	0	0	0	7.146128067	0	0	0	0	0	7.623249301	8.000000004	7.806179981	7.591064618	7.954242514	0	0	0	0	7.763428001	0	7.342422701	0	7.322219315	7.662757841	7.612783867	7.763428001	0
IMPDH2	7.000000043	0	0	0	6.579783711	0	6.447158186	6.6020601	6.230449177	6.65321261	0	0	0	0	0	0	6.681241328	6.880813649	6.924279338	6.724275952	6.681241328	6.939519303	0	0	0	0	0	6.892094658	7.799340556	7.568201736	7.278753624	7.724275878	7.079181282	7.875061269	7.934498456	0	6.301030213	8.041392689	0	8.113943356	7.38021126	0	0	0	0	8.633468457	7.491361708	8.612783858	8.79934055
CKB	0	0	0	6.27875383	0	0	0	0	0	0	0	0	0	7.477121269	7.568201736	7.556302513	6.477121399	6.65321261	6.681241328	7.041392725	7.041392725	6.944482722	7.361727855	7.176091288	6.556302621	8.146128039	7.919078098	8.000000004	7.934498456	7.939519258	7.732393768	6.662757926	0	0	0	0	7.278753624	0	7.929418931	8.176091262	7.832508919	8.74036269	7.518513953	0	7.079181282	9.079181246	8.301029998	7.845098046	9.079181246
XRCC6	0	0	0	0	6.913813905	6.812913423	0	0	0	0	0	0	0	6.65321261	6.982271278	6.698970091	6.85125841	0	6.892094658	0	0	0	0	0	0	0	7.113943386	7.342422701	7.361727855	0	6.832508977	7.301030017	6.531479045	6.113943686	0	0	0	8.949390007	0	0	0	0	0	0	0	0	6.913813905	8.568201725	9.146128036
RNH1	0	0	0	6.681241328	0	0	0	0	0	0	0	0	0	0	0	0	6.740362768	7.146128067	6.9731279	0	0	0	0	0	0	0	0	0	0	0	0	7.255272529	7.000000043	6.662757926	7.342422701	0	0	8.176091262	0	7.826074809	0	0	0	0	6.963787875	7.845098046	7.53147893	8.41497335	8.447158033
TPT1	0	0	0	0	0	0	6.963787875	7.041392725	7.041392725	6.518514071	7.176091288	6.986771779	6.95904144	6.556302621	0	6.531479045	6.770852085	6.949390055	6.939519303	0	0	0	0	0	0	7.944482677	8.000000004	7.869231726	0	0	7.819543942	0	7.255272529	7.397940026	8.041392689	0	0	8.204119985	7.643452686	8.361727838	0	7.698970013	0	0	0	8.431363766	7.643452686	8.041392689	8.518513941
APEH	0	0	0	0	0	0	6.361728025	0	0	0	0	0	0	0	0	0	0	0	0	0	0	0	0	0	0	0	0	0	0	0	0	0	0	0	6.73239384	0	0	0	0	0	0	0	0	0	0	7.986771739	7.568201736	0	0
MIF	6.04139308	5.949390495	7.342422701	0	0	0	8.000000004	8.000000004	0	8.041392689	7.342422701	7.20412001	7.20412001	6.491361834	6.785329906	6.724275952	8.361727838	8.50514998	8.431363766	0	0	0	0	0	0	0	7.176091288	8.176091262	7.903089992	8.301029998	0	8.602059992	7.698970013	8.342422683	7.785329842	7.462398013	8.041392689	0	0	0	8.892094603	0	0	0	8.447158033	9.591064607	9.477121255	9.77815125	10.11394335
FDPS	0	0	0	0	0	0	0	0	0	0	0	0	0	7.041392725	6.698970091	0	0	0	0	0	0	0	0	0	0	0	0	0	0	0	0	6.518514071	0	0	0	0	0	0	0	7.556302513	0	7.462398013	0	0	6.886490782	8.113943356	8.342422683	8.204119985	8.041392689
JUP	6.838849154	6.806180042	6.748188105	0	0	0	8.176091262	8.113943356	8.07918125	7.880813598	7.518513953	7.38021126	7.462398013	7.982271238	7.146128067	8.176091262	0	0	0	0	7.079181282	7.000000043	6.875061321	0	0	6.623249394	7.176091288	7.414973365	7.176091288	6.832508977	0	8.544068046	8.146128039	7.845098046	8.041392689	7.301030017	7.301030017	8.146128039	0	8.07918125	8.278753603	0	7.255272529	7.806179981	8.591064608	10	0	9.322219295	8.556302502
UCHL3	0	0	0	0	0	0	0	0	0	0	0	0	0	0	0	0	0	0	0	0	0	0	0	0	0	0	0	0	0	0	0	7.113943386	0	6.724275952	6.954242558	0	0	7.20412001	0	0	0	7.579783608	0	0	0	8.07918125	6.903090041	0	8.176091262
RPS2	7.602060002	7.602060002	0	0	6.491361834	6.477121399	6.954242558	6.785329906	6.85125841	6.929418977	6.9731279	6.740362768	6.67209795	7.146128067	7.230448947	6.763428068	7.43136378	7.397940026	7.397940026	6.919078145	7.041392725	6.27875383	6.724275952	6.447158186	6.27875383	7.934498456	8.176091262	8.301029998	7.623249301	8.146128039	8.07918125	8.041392689	7.38021126	7.414973365	7.892094608	7.176091288	7.544068057	8.959041393	8.000000004	8.113943356	8.146128039	8.146128039	0	0	7.863322866	8.380211244	7.544068057	9.447158031	9.113943353
DSP	0	0	0	0	0	0	0	0	0	0	0	0	0	0	0	0	0	0	0	0	0	0	0	0	0	0	0	0	0	0	0	6.6020601	6.913813905	0	7.602060002	0	0	7.278753624	0	0	0	0	0	8.113943356	0	7.792391697	0	8.50514998	7.397940026
CBR1	0	0	0	0	0	6.505150114	7.176091288	7.176091288	7.230448947	6.949390055	7.113943386	7.041392725	6.95904144	6.79239176	6.85125841	6.913813905	6.845098102	7.20412001	7.176091288	7.690196089	7.462398013	7.20412001	7.845098046	7.612783867	7.414973365	8.477121256	8.361727838	8.579783598	7.838849097	7.908485024	7.919078098	8.041392689	7.176091288	7.255272529	7.079181282	7.643452686	7.447158047	8.176091262	7.963787832	8.255272508	0	8.880813593	7.716003352	0	7.863322866	8.431363766	7.832508919	9.176091259	8.982271233
GOT1	0	6.826074868	0	0	0	0	0	0	6.255272746	0	0	0	0	0	0	0	0	0	0	0	0	0	0	0	0	0	0	0	0	0	0	7.732393768	0	0	7.079181282	0	0	0	0	0	0	0	0	0	0	7.602060002	7.662757841	6.913813905	0
LGALS3	0	0	0	0	0	0	7.544068057	7.301030017	7.462398013	6.986771779	7.361727855	7.278753624	7.301030017	6.799340618	6.799340618	6.986771779	0	0	0	0	0	0	0	0	0	0	0	0	0	0	0	7.53147893	7.361727855	7.568201736	7.255272529	7.301030017	0	0	0	7.53147893	0	0	0	0	7.792391697	8.623249291	0	0	0
TCP1	7.176091288	0	0	7.041392725	7.000000043	7.041392725	6.812913423	6.819544001	6.690196169	6.763428068	7.38021126	6.982271278	7.146128067	7.146128067	7.079181282	7.278753624	7.000000043	7.301030017	7.176091288	7.230448947	7.146128067	7.230448947	7.230448947	7.079181282	6.755874932	8.380211244	8.361727838	8.278753603	8.146128039	7.99122608	7.97772361	8.342422683	7.755874863	8.07918125	7.819543942	7.792391697	7.556302513	8.255272508	7.792391697	8.113943356	7.986771739	7.755874863	7.041392725	0	7.568201736	8.556302502	7.477121269	9.204119983	8.919078093
ARF4	0	7.113943386	6.845098102	7.903089992	7.518513953	7.505149992	7.763428001	7.949390012	7.832508919	7.770852019	7.612783867	7.491361708	7.477121269	7.724275878	7.740362697	7.724275878	7.716003352	7.99122608	8.000000004	7.799340556	7.568201736	7.732393768	7.230448947	7.653212523	7.301030017	8.544068046	8.556302502	8.643452677	7.929418931	8.230448924	7.929418931	7.954242514	7.949390012	7.897627097	7.812913363	7.732393768	8.113943356	8.113943356	8.544068046	8.39794001	8.255272508	8.755874856	8.113943356	0	8.531478918	9.397940009	8.255272508	9.146128036	9.462397998
ANXA7	6.6020601	6.763428068	6.770852085	6.27875383	0	0	7.939519258	8.041392689	8.000000004	7.875061269	7.397940026	7.278753624	7.301030017	0	0	0	6.85125841	6.447158186	6.799340618	0	0	7.113943386	0	0	0	0	7.230448947	7.491361708	6.832508977	7.690196089	7.518513953	8.113943356	7.477121269	7.913813858	7.643452686	0	7.556302513	8.230448924	0	7.919078098	7.973127858	7.612783867	7.255272529	0	7.732393768	8.146128039	7.740362697	9.462397998	8.380211244
PSMB1	0	0	0	0	0	0	6.770852085	6.67209795	0	0	0	0	0	0	0	0	6.977723651	7.041392725	7.113943386	0	0	0	0	0	0	0	7.342422701	7.518513953	7.322219315	7.041392725	7.518513953	7.278753624	0	6.724275952	6.95904144	6.568201841	0	7.819543942	7.886490731	7.230448947	7.556302513	0	7.255272529	0	7.041392725	7.863322866	7.342422701	7.892094608	7.886490731
GSTM3	6.612783963	6.770852085	6.95904144	0	0	0	7.113943386	6.85125841	7.041392725	6.579783711	0	0	6.204120254	6.86332292	6.740362768	0	7.301030017	7.477121269	7.301030017	8.204119985	7.886490731	8.176091262	0	7.255272529	7.146128067	8.041392689	8.342422683	8.361727838	0	0	0	7.716003352	7.113943386	0	0	0	0	0	0	7.146128067	0	0	0	0	0	0	7.20412001	8.602059992	8.204119985
VDAC1	0	0	0	0	0	0	7.342422701	7.397940026	7.414973365	7.361727855	7.806179981	7.505149992	7.633468466	0	0	0	7.653212523	7.653212523	7.681241246	0	0	0	0	0	0	0	0	0	0	0	0	7.113943386	7.176091288	6.903090041	7.079181282	6.690196169	0	0	0	0	0	0	0	0	7.806179981	0	7.477121269	0	0
PCMT1	0	0	6.857332557	0	0	0	6.612783963	6.431363925	6.544068168	0	6.778151323	6.662757926	6.556302621	0	0	0	0	6.612783963	6.079181608	7.041392725	6.949390055	6.230449177	6.544068168	0	0	7.995635199	7.230448947	7.869231726	8.07918125	7.397940026	7.579783608	8.000000004	7.278753624	7.913813858	7.653212523	0	0	0	0	8.000000004	7.518513953	8.113943356	0	0	0	8.07918125	7.230448947	0	8.113943356
PPIB	0	0	0	0	0	0	8.544068046	8.556302502	8.447158033	8.431363766	8.113943356	7.857332502	7.919078098	0	0	0	7.255272529	7.342422701	7.255272529	0	0	0	0	0	0	6.27875383	6.447158186	0	0	0	0	7.690196089	8.000000004	6.690196169	7.826074809	0	0	7.361727855	0	7.397940026	0	0	7.342422701	0	7.755874863	7.863322866	7.716003352	8.361727838	7.591064618
EEF1B2	0	0	0	0	0	0	0	6.579783711	0	0	0	0	0	0	7.342422701	0	6.113943686	6.544068168	0	0	7.612783867	7.230448947	7.732393768	0	7.361727855	8.041392689	7.518513953	6.67209795	7.079181282	0	0	7.732393768	0	6.869231778	7.755874863	0	0	0	7.707570185	0	0	7.812913363	0	0	7.322219315	8.977723606	7.939519258	8.892094603	9.278753601
MPST	0	0	0	0	0	0	0	0	0	0	6.491361834	0	0	6.505150114	6.505150114	6.491361834	6.986771779	6.919078145	6.832508977	0	6.86332292	0	7.20412001	0	6.623249394	7.770852019	6.982271278	0	0	0	0	0	0	0	0	0	0	7.113943386	0	0	0	0	0	0	0	0	7.278753624	8.380211244	8.963787828
PSMA1	6.79239176	6.886490782	6.880813649	0	0	0	0	0	0	0	0	0	0	0	0	0	0	0	0	0	0	0	0	0	0	0	0	0	0	0	0	7.623249301	6.929418977	7.361727855	7.732393768	6.724275952	0	0	7.832508919	0	7.672097867	7.176091288	0	0	6.832508977	7.919078098	7.361727855	8.204119985	0
PSMA2	0	0	0	6.643452775	6.579783711	6.67209795	0	0	0	0	0	0	0	0	0	0	0	0	0	0	0	0	0	0	0	0	0	6.724275952	0	0	0	6.919078145	0	7.146128067	5.977724062	7.255272529	0	7.845098046	7.698970013	8.230448924	0	0	0	0	6.919078145	7.934498456	7.230448947	7.662757841	0
PTBP1	0	0	0	7.301030017	7.113943386	7.322219315	7.908485024	0	7.792391697	6.544068168	0	0	0	6.954242558	7.000000043	7.949390012	6.531479045	7.653212523	7.755874863	0	0	0	0	0	0	7.698970013	7.462398013	7.623249301	7.748188035	7.544068057	7.477121269	0	0	0	0	0	0	7.968482953	0	8.07918125	7.732393768	8.255272508	0	0	7.880813598	7.491361708	0	8.919078093	8.662757833
EEF1G	6.85125841	6.819544001	6.897627146	6.531479045	0	0	7.230448947	7.230448947	6.85125841	7.361727855	6.431363925	6.785329906	6.755874932	7.000000043	0	7.000000043	7.146128067	7.20412001	7.20412001	7.838849097	7.778151258	7.778151258	7.623249301	7.770852019	7.690196089	8.612783858	8.653212515	8.690196081	7.832508919	8.113943356	8.255272508	8.176091262	7.447158047	7.799340556	8.176091262	7.518513953	7.707570185	8.518513941	8.39794001	8.462397999	8.322219297	8.982271233	7.591064618	6.579783711	7.863322866	8.968482949	8.07918125	9.113943353	9.785329835
CALR	0	0	0	6.65321261	6.462398148	6.908485072	8.690196081	8.707570177	8.681241238	8.322219297	8.41497335	7.963787832	8.491361695	0	6.939519303	7.079181282	6.944482722	7.944482677	7.662757841	0	7.38021126	7.447158047	0	0	0	0	0	0	0	0	0	7.986771739	8.113943356	7.812913363	7.939519258	7.869231726	0	0	0	7.397940026	0	7.806179981	7.397940026	0	8.113943356	0	7.880813598	8.278753603	7.963787832
CANX	6.544068168	6.447158186	0	0	6.397940182	6.477121399	8.944482673	8.977723606	8.531478918	8.477121256	8.176091262	8.204119985	8.230448924	7.278753624	0	0	6.886490782	7.000000043	7.041392725	0	0	0	0	0	0	0	0	0	0	0	0	7.897627097	8.255272508	7.414973365	7.414973365	7.792391697	0	0	0	0	0	0	0	0	8.623249291	7.397940026	7.342422701	8.278753603	0
PSMA5	0	0	0	0	0	0	0	0	0	0	6.95904144	6.832508977	0	0	6.73239384	0	7.20412001	7.176091288	7.113943386	6.643452775	6.591064718	6.477121399	0	0	0	6.755874932	7.505149992	7.939519258	6.977723651	7.38021126	7.113943386	7.643452686	7.146128067	6.531479045	7.568201736	6.963787875	7.38021126	8.07918125	0	7.462398013	0	0	0	0	7.278753624	8.39794001	7.278753624	8.255272508	8.301029998
PSMB4	0	0	0	0	0	0	0	0	0	0	0	0	0	0	0	0	0	0	0	7.146128067	0	0	0	0	0	0	0	0	0	0	0	7.301030017	0	0	7.38021126	0	0	0	0	0	0	0	0	0	0	0	0	0	0
PSMB6	0	0	6.778151323	0	0	0	0	0	0	0	0	0	0	0	0	0	0	0	0	0	0	0	0	0	0	6.875061321	0	7.518513953	0	0	0	7.447158047	0	0	7.230448947	6.612783963	0	0	0	0	0	0	0	0	0	8.113943356	0	0	0
PSMB5	7.113943386	0	6.431363925	0	0	0	0	0	0	0	0	0	0	0	0	0	0	0	0	0	0	0	0	6.623249394	0	7.716003352	7.851258355	7.806179981	0	0	0	7.672097867	0	0	7.643452686	7.491361708	0	7.633468466	6.681241328	7.38021126	0	0	0	0	6.812913423	7.612783867	7.176091288	7.97772361	0
S100A2	0	0	0	0	0	0	0	0	0	0	0	0	0	0	0	0	0	0	0	0	0	0	0	0	0	0	0	0	0	0	0	0	0	0	0	0	0	0	0	7.897627097	0	0	0	0	7.792391697	0	0	9.913813852	0
PRDX6	6.643452775	6.662757926	6.662757926	0	6.982271278	7.146128067	6.929418977	6.886490782	7.079181282	7.079181282	6.623249394	0	0	7.041392725	6.643452775	6.491361834	7.20412001	7.20412001	7.20412001	7.301030017	7.342422701	7.518513953	7.602060002	7.113943386	7.000000043	7.491361708	7.959041397	8.113943356	6.79239176	7.954242514	7.919078098	8.380211244	7.880813598	7.690196089	8.322219297	7.53147893	7.477121269	8.146128039	8.278753603	8.255272508	7.505149992	8.176091262	7.591064618	0	7.869231726	8.919078093	8.041392689	8.875061264	8.851258349
CMPK1	0	0	0	0	0	0	7.633468466	7.633468466	7.556302513	7.447158047	0	0	0	0	7.146128067	0	6.255272746	6.740362768	6.568201841	0	0	0	0	0	0	0	0	0	0	0	0	7.301030017	6.875061321	0	6.477121399	0	0	7.491361708	0	7.568201736	0	0	0	0	7.278753624	8.491361695	7.113943386	8.204119985	8.301029998
PEBP1	0	6.591064718	0	0	0	0	0	0	0	0	0	0	0	6.27875383	0	7.113943386	0	0	0	8.278753603	7.986771739	8.176091262	7.857332502	7.397940026	7.113943386	7.662757841	8.041392689	8.653212515	7.875061269	8.447158033	8.176091262	7.939519258	7.681241246	7.913813858	7.491361708	7.892094608	7.869231726	0	8.230448924	7.748188035	0	8.812913357	8.230448924	0	8.07918125	8.462397999	8.50514998	9.342422681	8.531478918
PDIA3	6.361728025	0	6.322219502	6.832508977	6.845098102	6.86332292	9.041392686	8.919078093	8.986771735	8.929418926	8.579783598	8.39794001	8.41497335	7.176091288	7.146128067	7.20412001	7.924279291	7.924279291	7.672097867	7.041392725	7.146128067	7.176091288	0	6.518514071	6.04139308	8.041392689	8.07918125	7.880813598	7.477121269	7.851258355	7.568201736	8.431363766	7.913813858	7.982271238	7.863322866	8.113943356	7.041392725	8.041392689	0	8.176091262	5.623250324	7.690196089	6.913813905	0	8.518513941	7.707570185	6.982271278	9	8.518513941
PPP2R1A	0	0	0	7.278753624	6.85125841	7.20412001	7.041392725	7.38021126	7.278753624	6.939519303	7.342422701	6.838849154	7.113943386	7.826074809	7.707570185	7.863322866	7.230448947	7.20412001	7.447158047	7.361727855	6.986771779	7.113943386	7.301030017	7.230448947	6.880813649	8.301029998	8.07918125	8.176091262	7.755874863	7.612783867	7.690196089	7.672097867	7.755874863	7.716003352	7.681241246	7.38021126	7.662757841	8.255272508	7.875061269	8.322219297	7.799340556	8.698970005	7.505149992	0	7.748188035	8.681241238	8.07918125	8.913813853	9.204119983
STIP1	6.591064718	0	6.623249394	6.995635238	7.000000043	6.986771779	6.698970091	6.85125841	6.819544001	6.6020601	6.414973515	0	0	7.041392725	7.146128067	7.113943386	7.278753624	7.278753624	7.301030017	7.079181282	6.812913423	6.85125841	7.079181282	6.897627146	6.949390055	7.755874863	7.602060002	7.748188035	7.633468466	7.518513953	7.447158047	8.113943356	7.53147893	7.690196089	7.903089992	7.000000043	7.43136378	0	0	7.944482677	7.643452686	7.707570185	7.000000043	0	7.623249301	8.819543936	8.230448924	8.255272508	7.643452686
KIF5B	0	0	0	0	0	0	6.763428068	6.531479045	6.977723651	6.462398148	0	6.04139308	0	0	0	0	0	0	0	0	0	0	0	0	0	0	7.397940026	0	7.43136378	0	0	0	0	7.146128067	6.785329906	0	0	8.113943356	0	7.623249301	7.518513953	0	0	0	0	7.944482677	7.462398013	8.39794001	8.41497335
PHB	0	0	0	0	0	0	0	0	6.568201841	0	7.20412001	7.278753624	7.146128067	0	0	0	7.602060002	7.491361708	7.633468466	0	0	0	0	0	0	0	0	0	0	0	0	7.623249301	7.041392725	0	0	0	0	0	0	0	0	0	0	0	6.963787875	0	6.431363925	0	0
RPL22	0	0	0	0	0	0	0	0	0	6.447158186	0	0	0	6.812913423	0	6.869231778	7.041392725	6.9731279	6.04139308	0	0	0	7.505149992	7.342422701	7.041392725	7.230448947	0	6.826074868	7.643452686	7.477121269	7.505149992	7.43136378	0	7.079181282	7.20412001	0	0	0	0	7.602060002	7.690196089	0	0	0	7.491361708	7.838849097	7.43136378	8.977723606	9.113943353
SERPINB5	0	0	0	0	0	0	6.892094658	0	6.67209795	0	7.255272529	6.770852085	6.913813905	0	6.623249394	6.662757926	0	0	0	0	0	0	0	0	0	0	0	0	0	0	0	0	6.919078145	0	6.982271278	0	0	0	0	0	0	0	0	0	0	8.146128039	0	8.568201725	8.462397999
TALDO1	0	0	0	6.740362768	6.716003427	6.67209795	0	0	0	0	0	0	0	6.982271278	6.9731279	6.949390055	0	0	0	0	0	0	0	0	0	7.447158047	6.897627146	0	7.322219315	7.342422701	0	7.963787832	7.041392725	7.041392725	7.000000043	0	7.322219315	0	7.20412001	7.792391697	6.643452775	0	0	5.986772182	7.591064618	0	7.556302513	8.531478918	8.579783598
ATP6V1A	0	0	0	0	0	0	0	0	0	0	0	0	0	0	0	0	6.556302621	0	6.568201841	0	0	0	0	0	0	7.838849097	7.845098046	7.869231726	8.000000004	7.792391697	7.491361708	6.806180042	7.20412001	7.43136378	5.740363479	7.414973365	6.832508977	0	0	7.633468466	7.414973365	7.633468466	0	0	6.903090041	7.681241246	7.612783867	9.462397998	8.591064608
HSPA9	0	0	0	0	0	0	6.934498502	6.986771779	7.041392725	6.897627146	7.322219315	7.146128067	7.230448947	0	0	0	7.591064618	7.414973365	7.662757841	0	0	0	0	0	0	0	0	0	0	0	0	7.690196089	7.041392725	6.939519303	7.041392725	7.255272529	0	0	0	0	0	0	0	0	7.778151258	0	7.041392725	7.653212523	7.934498456
EIF4A3	0	0	0	0	0	0	0	0	0	0	6.505150114	0	0	6.255272746	6.301030213	6.04139308	0	0	6.770852085	0	0	0	0	0	0	7.903089992	7.832508919	7.959041397	6.812913423	7.462398013	7.447158047	0	0	0	6.908485072	0	0	7.812913363	0	0	0	8.491361695	0	0	7.113943386	0	7.579783608	9.322219295	9.079181246
RPL3	0	0	6.977723651	0	6.968482995	0	7.477121269	0	0	0	0	0	0	7.20412001	0	6.491361834	6.662757926	0	7.602060002	0	0	0	0	0	0	7.740362697	7.944482677	8.113943356	8.146128039	8.176091262	8.041392689	8.041392689	6.929418977	7.146128067	7.770852019	0	7.230448947	8.857332497	0	0	7.633468466	0	0	0	7.857332502	0	6.869231778	9.301029996	8.991226076
CAPG	0	0	0	0	0	0	0	7.041392725	0	0	6.819544001	0	0	0	0	0	0	0	0	0	0	0	0	0	0	0	0	0	0	0	0	0	0	7.38021126	0	0	0	0	0	0	0	0	0	0	0	7.851258355	0	7.763428001	0
CCT6A	0	0	0	7.361727855	6.176091549	7.623249301	7.255272529	6.954242558	0	6.462398148	6.681241328	0	6.892094658	7.623249301	6.949390055	7.000000043	7.20412001	7.491361708	7.397940026	6.431363925	6.568201841	0	6.397940182	7.146128067	0	7.886490731	7.653212523	7.968482953	7.740362697	7.681241246	7.732393768	7.732393768	7.716003352	7.462398013	7.716003352	7.176091288	7.230448947	8.301029998	8.07918125	8.176091262	7.851258355	7.995635199	7.43136378	0	7.568201736	8.579783598	7.662757841	9.204119983	8.79239169
MDH1	0	6.977723651	0	0	6.845098102	6.806180042	6.986771779	7.000000043	7.079181282	0	0	0	0	6.505150114	0	0	7.342422701	7.176091288	7.301030017	7.041392725	7.113943386	6.716003427	6.908485072	0	6.949390055	7.732393768	7.799340556	7.698970013	7.591064618	7.491361708	7.53147893	7.903089992	7.43136378	7.477121269	7.623249301	7.278753624	7.041392725	7.770852019	7.826074809	8.113943356	7.897627097	7.880813598	7.623249301	0	7.505149992	8.770852012	7.755874863	8.591064608	8.826074803
MDH2	0	0	0	6.579783711	6.342422878	6.623249394	7.491361708	7.477121269	7.278753624	7.342422701	7.643452686	7.602060002	7.716003352	7.20412001	7.230448947	6.982271278	7.886490731	8.113943356	8.113943356	6.544068168	6.477121399	6.491361834	6.6020601	6.361728025	5.643453664	7.079181282	7.000000043	7.176091288	7.113943386	0	0	8.000000004	7.602060002	7.278753624	6.518514071	7.447158047	7.20412001	0	0	7.414973365	0	7.99122608	6.518514071	0	7.643452686	0	7.556302513	9.255272505	9.477121255
PAFAH1B1	0	0	0	0	0	0	0	0	0	0	0	0	0	0	0	0	7.113943386	7.146128067	7.079181282	7.113943386	6.73239384	6.698970091	0	6.633468557	0	7.863322866	7.653212523	7.579783608	7.38021126	0	0	6.643452775	7.230448947	7.041392725	7.53147893	6.748188105	0	0	0	7.690196089	7.633468466	7.491361708	0	0	7.447158047	8.041392689	7.255272529	8.74036269	9
USP5	0	0	0	6.146128346	6.447158186	0	0	0	0	0	0	0	0	6.322219502	0	6.414973515	6.954242558	0	6.982271278	6.633468557	0	6.204120254	0	6.65321261	0	7.698970013	0	7.20412001	7.255272529	0	7.255272529	7.000000043	7.255272529	6.6020601	6.255272746	6.716003427	7.322219315	8.113943356	7.986771739	7.832508919	7.755874863	7.812913363	0	0	0	7.875061269	7.322219315	8.361727838	8.875061264
IQGAP1	6.995635238	7.079181282	6.65321261	6.778151323	7.278753624	7.447158047	8.204119985	8.176091262	7.903089992	7.716003352	7.000000043	6.770852085	6.819544001	8.146128039	8.176091262	8.146128039	8.041392689	7.880813598	8.176091262	6.643452775	0	6.361728025	6.397940182	0	5.875061842	7.20412001	7.518513953	7.716003352	6.903090041	7.38021126	7.20412001	8.255272508	8.041392689	8.176091262	8.176091262	7.690196089	7.568201736	8.230448924	7.806179981	8.653212515	8.146128039	7.892094608	7.612783867	0	8.000000004	9.079181246	8.832508913	8.633468457	8.568201725
CAPZA2	6.204120254	0	6.176091549	0	0	0	7.079181282	7.113943386	7.079181282	7.113943386	0	0	0	0	0	0	7.079181282	7.230448947	7.230448947	7.176091288	7.146128067	7.113943386	0	6.982271278	0	7.968482953	0	7.851258355	7.763428001	7.462398013	7.544068057	7.518513953	7.278753624	7.230448947	7.176091288	7.397940026	0	0	8.07918125	8.230448924	7.863322866	7.857332502	0	0	7.505149992	8.462397999	7.857332502	0	9.079181246
PREP	0	0	0	0	0	0	0	0	0	0	0	0	0	0	0	0	0	0	0	0	0	0	0	0	0	7.361727855	6.707570261	7.301030017	0	0	0	0	0	0	5.505151335	0	0	7.544068057	0	0	7.301030017	8.113943356	6.698970091	0	0	7.414973365	7.000000043	8.176091262	8.995635195
CCT5	0	0	6.857332557	6.707570261	7.43136378	6.755874932	6.86332292	6.724275952	6.819544001	0	7.079181282	6.968482995	6.568201841	8.113943356	7.653212523	7.763428001	7.301030017	7.397940026	7.230448947	7.176091288	7.079181282	7.146128067	6.67209795	6.968482995	6.361728025	8.041392689	8.07918125	8.176091262	7.99122608	7.763428001	7.929418931	7.732393768	7.612783867	7.544068057	7.690196089	7.38021126	7.716003352	8.74036269	8.000000004	8.255272508	7.845098046	8.342422683	7.113943386	0	7.690196089	8.50514998	7.556302513	9.255272505	8.982271233
IDH2	0	0	0	0	0	0	6.770852085	6.73239384	6.662757926	6.505150114	7.146128067	0	6.99122612	0	0	0	7.041392725	7.041392725	6.897627146	0	0	0	0	0	0	0	0	0	0	0	0	7.43136378	0	0	0	0	0	0	7.748188035	0	0	0	0	0	7.579783608	0	7.995635199	8.568201725	8.301029998
ALDH9A1	7.113943386	7.146128067	7.146128067	0	0	6.6020601	0	0	0	0	6.65321261	6.146128346	6.568201841	6.544068168	6.903090041	6.838849154	6.99122612	7.113943386	6.832508977	8.204119985	8.176091262	8.07918125	8.041392689	8.000000004	7.832508919	8.913813853	8.707570177	8.785329836	7.662757841	8.07918125	8.000000004	7.716003352	7.20412001	7.748188035	7.462398013	7.832508919	0	8.146128039	8.301029998	8.204119985	7.698970013	9.146128036	7.681241246	0	7.53147893	8.301029998	7.447158047	9.204119983	9
FASN	7.857332502	7.755874863	7.755874863	6.591064718	6.903090041	6.643452775	7.602060002	7.462398013	7.556302513	7.322219315	7.505149992	7.342422701	7.176091288	8.07918125	8.39794001	8.41497335	7.799340556	7.716003352	7.755874863	7.176091288	7.301030017	7.505149992	6.612783963	6.681241328	6.643452775	8.41497335	8.07918125	8.361727838	7.845098046	7.908485024	7.934498456	8.361727838	7.806179981	8.000000004	8.113943356	7.732393768	7.826074809	9.041392686	8.50514998	8.716003344	7.908485024	8.361727838	7.838849097	0	8.113943356	9.579783597	8.431363766	9	9.462397998
CCT3	6.806180042	6.880813649	6.67209795	6.826074868	6.748188105	6.763428068	6.740362768	6.806180042	6.740362768	6.886490782	7.255272529	6.934498502	6.79239176	6.785329906	6.949390055	6.897627146	7.230448947	7.342422701	7.322219315	7.278753624	6.86332292	6.819544001	7.342422701	7.322219315	7.041392725	8.176091262	8.230448924	8.361727838	8.041392689	7.949390012	8.07918125	7.973127858	7.43136378	7.763428001	7.826074809	7.544068057	7.770852019	8.518513941	7.806179981	8.361727838	8.230448924	8.322219297	7.53147893	0	7.929418931	8.845098041	7.924279291	9.301029996	9
SRP9	0	0	0	0	0	0	0	0	0	0	0	0	0	0	0	0	0	0	0	0	0	0	0	0	0	0	0	0	7.20412001	6.763428068	7.785329842	0	0	0	0	0	0	0	0	0	8.041392689	0	0	0	0	0	0	7.342422701	0
PSMB2	0	0	0	0	0	0	0	0	0	0	0	0	0	0	0	0	6.806180042	0	0	0	0	0	0	0	0	7.322219315	6.65321261	0	0	0	0	6.785329906	0	0	7.000000043	0	0	7.799340556	0	0	7.20412001	7.662757841	7.278753624	0	6.875061321	8.301029998	0	7.838849097	8.07918125
TMED10	0	0	6.531479045	0	0	0	8.39794001	8.301029998	8.361727838	7.963787832	8.07918125	7.838849097	7.929418931	0	0	0	0	6.748188105	6.832508977	0	0	0	0	0	0	0	0	0	0	0	0	7.612783867	7.944482677	7.414973365	7.255272529	7.903089992	0	0	0	0	0	0	0	0	7.934498456	7.322219315	0	8.07918125	0
DNM2	0	0	0	6.6020601	0	0	0	0	0	0	7.041392725	0	6.99122612	0	7.041392725	6.875061321	6.633468557	6.812913423	6.770852085	0	0	0	6.770852085	0	0	7.342422701	7.176091288	7.146128067	7.301030017	7.414973365	7.53147893	6.963787875	7.176091288	6.954242558	7.041392725	6.9731279	6.662757926	7.342422701	0	7.556302513	7.556302513	7.53147893	0	0	7.322219315	8.176091262	7.361727855	8.602059992	8.698970005
CCT4	6.690196169	6.778151323	6.755874932	6.544068168	6.845098102	6.579783711	6.73239384	6.681241328	6.785329906	6.86332292	7.041392725	6.99122612	6.826074868	6.919078145	7.000000043	6.929418977	6.892094658	7.146128067	7.113943386	6.763428068	6.698970091	6.67209795	6.913813905	7.20412001	6.518514071	7.748188035	7.934498456	7.99122608	7.755874863	7.53147893	7.732393768	7.748188035	7.491361708	7.602060002	7.755874863	7.176091288	7.518513953	8.732393761	7.763428001	8.278753603	7.919078098	8.113943356	7.544068057	0	7.778151258	8.716003344	7.690196089	9.204119983	9
RAB7A	7.518513953	7.447158047	7.491361708	6.633468557	6.491361834	6.544068168	7.230448947	7.322219315	7.414973365	6.95904144	7.278753624	6.612783963	6.880813649	6.579783711	6.623249394	6.724275952	7.278753624	7.301030017	7.301030017	7.53147893	7.447158047	7.672097867	7.38021126	7.20412001	6.944482722	7.612783867	7.869231726	7.755874863	7.301030017	7.591064618	7.53147893	8.113943356	8.204119985	7.770852019	7.716003352	7.643452686	7.806179981	8.07918125	0	8.531478918	8.361727838	8.301029998	7.43136378	0	8.07918125	9.113943353	8.556302502	9.278753601	9.176091259
HSD17B4	0	0	0	0	0	0	8.041392689	8.041392689	7.880813598	7.322219315	8.041392689	8.113943356	7.672097867	0	5.732394564	0	6.73239384	7.079181282	6.913813905	0	0	0	0	0	0	0	0	0	0	0	0	7.079181282	7.176091288	0	0	7.079181282	0	0	0	0	0	0	0	5.995635633	6.633468557	0	7.079181282	7.892094608	6.95904144
HNRNPM	0	0	0	0	0	0	0	0	0	0	0	0	0	0	0	0	0	0	0	0	0	0	0	0	0	6.556302621	0	6.778151323	7.462398013	6.986771779	7.176091288	6.99122612	0	6.681241328	6.176091549	0	0	8.113943356	0	7.698970013	0	0	0	0	7.255272529	0	0	8.491361695	8.462397999
COPB1	0	0	0	0	0	0	6.845098102	6.806180042	6.518514071	0	6.799340618	6.633468557	6.623249394	7.079181282	6.99122612	6.880813649	0	0	6.414973515	0	0	0	0	0	0	0	0	6.86332292	0	0	0	6.755874932	0	6.000000434	6.531479045	0	6.770852085	8.255272508	7.681241246	7.278753624	7.643452686	8.07918125	0	0	6.799340618	7.755874863	0	8.602059992	9.079181246
SEC24C	0	0	0	0	0	0	0	0	0	0	0	0	0	0	0	0	0	0	0	0	0	0	0	0	0	0	0	0	0	0	0	0	0	0	0	0	0	0	0	0	0	0	0	0	0	0	0	8.301029998	8.000000004
NAPA	0	0	0	0	0	0	0	0	6.568201841	0	0	0	0	6.414973515	0	6.591064718	0	0	6.204120254	6.755874932	0	7.230448947	0	0	0	7.724275878	7.681241246	7.672097867	6.880813649	0	7.255272529	6.869231778	7.322219315	6.491361834	7.113943386	6.886490782	6.832508977	7.462398013	7.812913363	7.633468466	0	7.397940026	6.518514071	0	7.041392725	7.255272529	7.832508919	8.230448924	7.544068057
HNRNPH2	0	0	0	0	0	0	0	0	0	0	0	0	0	0	0	0	0	0	0	0	0	6.146128346	0	7.20412001	0	7.53147893	7.812913363	7.681241246	7.579783608	7.633468466	7.633468466	7.38021126	0	7.113943386	0	0	6.544068168	8.602059992	0	0	0	0	0	0	0	0	0	8.230448924	8.944482673
EIF6	0	0	0	0	0	0	0	0	0	0	0	0	0	6.748188105	7.146128067	0	0	0	0	0	0	0	0	0	0	0	0	7.732393768	0	0	0	6.819544001	6.99122612	6.892094658	6.903090041	0	0	0	0	0	0	0	0	0	6.740362768	8.113943356	7.230448947	8.995635195	9.447158031
RAB2A	6.623249394	6.556302621	6.544068168	0	0	0	7.113943386	7.079181282	6.968482995	6.968482995	7.000000043	6.698970091	6.838849154	0	6.146128346	0	6.845098102	6.897627146	7.000000043	6.826074868	6.643452775	6.806180042	6.85125841	6.505150114	0	7.556302513	7.690196089	7.591064618	0	7.43136378	7.414973365	7.113943386	6.929418977	6.518514071	6.579783711	6.681241328	7.322219315	0	0	8.041392689	8.000000004	7.863322866	6.913813905	0	7.851258355	8.672097859	7.716003352	8.819543936	8.79934055
NUTF2	0	0	0	0	0	0	0	0	0	0	0	0	0	0	0	0	6.897627146	6.963787875	6.892094658	6.380211423	0	7.079181282	0	0	0	7.602060002	7.278753624	7.414973365	0	0	0	7.518513953	0	7.301030017	5.707571028	0	0	7.924279291	7.838849097	7.897627097	7.556302513	8.230448924	0	0	0	8.146128039	0	9.041392686	9.278753601
HNRNPK	0	0	0	7.113943386	7.079181282	7.079181282	7.361727855	7.255272529	7.278753624	7.146128067	7.397940026	7.230448947	7.230448947	6.982271278	7.20412001	7.176091288	7.146128067	7.176091288	7.146128067	0	6.518514071	0	6.73239384	6.838849154	6.832508977	7.851258355	7.707570185	7.690196089	7.851258355	7.97772361	7.863322866	7.544068057	7.176091288	6.477121399	7.740362697	5.991226519	0	8.568201725	0	7.43136378	7.342422701	8.113943356	7.255272529	0	8.041392689	8.301029998	7.698970013	9.568201724	9.681241237
RPS8	7.342422701	7.612783867	7.602060002	0	0	0	6.477121399	6.518514071	0	6.623249394	6.681241328	6.361728025	6.556302621	7.000000043	6.838849154	6.79239176	6.763428068	7.079181282	7.041392725	0	6.322219502	0	7.342422701	0	0	8.146128039	8.000000004	8.255272508	8.544068046	8.462397999	8.544068046	8.342422683	7.230448947	7.255272529	8.000000004	7.278753624	7.556302513	9.079181246	0	8.255272508	8.278753603	7.690196089	0	0	7.919078098	8.230448924	7.447158047	9.643452677	9.113943353
RPS15A	0	0	0	0	0	0	0	6.322219502	0	0	6.579783711	0	0	0	0	0	0	6.623249394	6.361728025	0	0	0	0	0	0	0	0	0	0	7.462398013	0	0	0	7.623249301	7.633468466	7.278753624	0	8.518513941	0	7.361727855	7.53147893	0	0	0	7.255272529	7.230448947	6.518514071	8.851258349	8.838849091
RPS11	7.113943386	0	0	7.079181282	7.113943386	0	0	6.845098102	0	0	7.301030017	0	7.113943386	7.397940026	7.447158047	7.462398013	6.707570261	6.982271278	7.146128067	0	0	0	0	0	0	0	0	7.230448947	7.414973365	7.568201736	7.447158047	7.851258355	6.968482995	7.38021126	7.716003352	7.342422701	0	8.568201725	0	0	7.491361708	0	0	0	7.278753624	0	6.591064718	8.986771735	8.845098041
SNRPD3	0	6.322219502	0	0	0	0	0	0	0	0	0	0	0	0	0	0	0	0	0	0	0	0	6.591064718	7.38021126	7.113943386	0	0	0	6.477121399	7.716003352	7.939519258	7.113943386	0	6.838849154	0	0	0	8.041392689	0	7.612783867	7.176091288	0	0	0	6.812913423	8.041392689	6.85125841	8.518513941	8.968482949
ARF6	6.301030213	7.000000043	6.944482722	0	0	0	7.806179981	7.863322866	7.792391697	7.662757841	7.113943386	7.041392725	7.041392725	6.643452775	0	0	7.20412001	7.20412001	7.079181282	7.43136378	7.079181282	7.322219315	0	6.716003427	6.491361834	7.826074809	7.414973365	7.748188035	7.176091288	7.301030017	7.38021126	7.477121269	7.518513953	7.491361708	7.579783608	7.146128067	7.518513953	8.255272508	0	8.342422683	6.934498502	8.041392689	7.38021126	0	8.07918125	9.361727836	8.612783858	8.204119985	8.278753603
RPS4X	0	7.643452686	0	6.491361834	6.544068168	6.690196169	0	0	6.954242558	6.301030213	7.000000043	6.079181608	7.146128067	7.230448947	7.041392725	7.146128067	6.995635238	6.9731279	6.939519303	7.113943386	7.113943386	7.361727855	7.53147893	0	0	7.568201736	7.959041397	7.748188035	7.462398013	7.875061269	7.724275878	7.875061269	6.949390055	7.602060002	8.176091262	7.447158047	7.322219315	8.672097859	7.491361708	7.929418931	8.07918125	8.000000004	7.491361708	0	7.681241246	8.361727838	7.770852019	9.230448922	9.204119983
RAN	6.913813905	6.982271278	7.041392725	0	0	0	6.869231778	6.99122612	7.000000043	6.880813649	7.230448947	7.000000043	7.041392725	6.79239176	6.778151323	6.716003427	7.53147893	7.322219315	7.397940026	8.255272508	8.041392689	8.041392689	8.255272508	8.113943356	7.875061269	8.944482673	8.944482673	9.041392686	8.361727838	8.518513941	8.531478918	8.361727838	7.838849097	8.204119985	7.934498456	8.146128039	8.176091262	9.041392686	8.968482949	8.785329836	8.41497335	9.397940009	8.230448924	0	8.322219297	9.079181246	8.477121256	9.897627091	9.977723605
RPL23	0	0	0	0	6.903090041	6.643452775	0	0	0	0	0	0	0	7.176091288	7.079181282	7.176091288	7.447158047	7.397940026	7.447158047	0	0	0	0	0	0	0	0	0	6.740362768	0	0	6.716003427	0	6.579783711	7.792391697	0	0	8.431363766	0	0	7.633468466	0	0	0	7.643452686	0	7.414973365	8.732393761	8.662757833
RPL11	0	0	0	0	7.079181282	0	6.785329906	0	6.67209795	0	0	0	0	7.397940026	0	7.851258355	7.662757841	7.146128067	7.643452686	0	0	0	0	0	0	0	0	0	0	7.799340556	7.301030017	7.591064618	7.255272529	7.278753624	7.176091288	6.897627146	7.230448947	8.924279287	0	7.886490731	7.662757841	0	0	0	7.851258355	8.431363766	0	8.968482949	8.880813593
PPP2R2A	0	0	0	0	0	0	0	0	0	0	0	0	0	0	0	0	6.95904144	6.924279338	6.954242558	0	0	0	0	0	0	0	7.698970013	7.301030017	6.913813905	0	0	6.913813905	6.518514071	6.255272746	6.146128346	6.531479045	0	7.903089992	7.755874863	7.778151258	0	7.041392725	0	0	6.763428068	7.806179981	0	8.255272508	8.612783858
DYNLL1	7.278753624	7.20412001	6.724275952	0	0	0	0	0	6.04139308	0	6.079181608	0	0	0	0	0	0	0	0	0	0	7.698970013	7.633468466	7.38021126	0	0	8.431363766	8.477121256	7.982271238	8.255272508	8.278753603	8.230448924	0	8.204119985	8.176091262	7.838849097	6.977723651	8.568201725	0	7.886490731	8.041392689	7.770852019	7.255272529	6.690196169	7.690196089	8.380211244	7.681241246	9.278753601	8.908485019
GSTO1	0	0	0	0	0	0	7.113943386	6.903090041	7.000000043	7.301030017	0	0	0	0	0	0	7.079181282	7.176091288	6.6020601	0	0	0	0	0	0	0	0	0	0	7.748188035	0	6.681241328	7.278753624	7.146128067	7.662757841	0	0	0	0	0	0	0	7.000000043	0	0	7.707570185	8.301029998	8.74036269	8.462397999
ERH	0	0	0	0	0	0	0	0	0	0	0	0	0	0	6.556302621	0	0	0	0	0	0	0	0	0	0	0	0	0	0	0	0	0	0	6.755874932	0	0	0	7.863322866	0	0	0	0	0	0	0	0	0	8.982271233	8.662757833
SRSF3	0	0	0	0	0	0	0	0	0	0	0	0	0	0	0	0	0	0	0	0	0	0	0	0	0	7.361727855	0	0	0	7.995635199	7.986771739	0	6.531479045	0	6.113943686	0	0	7.146128067	0	0	0	0	0	0	0	0	0	8.845098041	8.72427587
PFKP	0	0	0	6.591064718	6.690196169	6.612783963	7.361727855	7.397940026	7.322219315	7.146128067	7.000000043	6.982271278	7.041392725	6.892094658	6.6020601	6.785329906	7.041392725	7.230448947	7.20412001	0	7.079181282	7.20412001	0	0	6.995635238	7.806179981	7.869231726	7.986771739	7.556302513	7.53147893	7.477121269	7.591064618	6.799340618	7.477121269	7.43136378	0	7.612783867	8.322219297	7.944482677	7.97772361	7.770852019	8.041392689	7.414973365	0	7.579783608	7.913813858	0	9	9.113943353
NUCB1	0	0	0	0	0	0	7.934498456	7.763428001	7.863322866	7.740362697	7.568201736	7.462398013	7.505149992	0	0	0	0	0	6.913813905	0	0	0	0	0	0	0	0	0	0	0	0	0	7.633468466	0	0	0	0	0	0	0	0	0	0	0	7.43136378	0	0	0	0
RPL6	0	7.176091288	0	0	0	0	6.518514071	0	0	6.255272746	6.146128346	6.623249394	0	7.113943386	7.113943386	6.924279338	7.113943386	7.230448947	7.176091288	0	0	0	7.322219315	0	0	7.322219315	7.505149992	0	8.176091262	8.113943356	8.146128039	8.000000004	7.255272529	0	7.633468466	0	0	8.643452677	0	7.278753624	7.113943386	7.505149992	6.690196169	0	7.361727855	7.491361708	7.255272529	8.851258349	8.579783598
GLO1	6.462398148	0	0	0	0	0	6.716003427	6.79239176	6.690196169	6.73239384	0	5.991226519	0	6.929418977	6.954242558	0	7.176091288	7.255272529	7.113943386	7.278753624	7.278753624	7.255272529	7.146128067	6.724275952	6.806180042	8.07918125	8.07918125	8.176091262	7.591064618	7.799340556	7.690196089	7.230448947	0	7.568201736	6.67209795	7.342422701	7.361727855	0	8.74036269	8.322219297	8.000000004	8.851258349	7.770852019	0	7.755874863	8.662757833	7.863322866	8.72427587	8.79239169
PRDX1	7.20412001	7.278753624	7.414973365	0	0	0	7.913813858	7.919078098	7.954242514	7.698970013	7.041392725	6.838849154	6.812913423	0	0	0	7.698970013	7.982271238	7.633468466	7.342422701	7.278753624	6.995635238	7.778151258	7.414973365	7.361727855	8.612783858	8.672097859	8.568201725	8.07918125	8.146128039	8.07918125	9.748188027	8.785329836	8.491361695	8.322219297	8.342422683	7.544068057	9.041392686	7.278753624	8.462397999	8.146128039	7.20412001	8.113943356	7.568201736	8.832508913	9.531478917	8.447158033	9.230448922	9.380211242
C1QBP	0	0	0	0	7.43136378	0	0	7.041392725	6.995635238	6.079181608	7.973127858	7.903089992	7.361727855	7.342422701	0	7.806179981	7.785329842	7.934498456	7.770852019	0	6.361728025	0	0	0	0	7.146128067	0	6.755874932	0	0	0	6.785329906	7.041392725	6.707570261	6.838849154	6.908485072	0	0	0	7.763428001	0	0	7.255272529	0	7.763428001	0	7.518513953	8.770852012	9.041392686
CKAP4	0	0	0	0	0	0	7.612783867	7.698970013	7.672097867	7.602060002	7.785329842	7.763428001	7.690196089	0	0	0	6.544068168	6.826074868	6.67209795	0	0	0	0	0	0	0	0	0	0	0	0	6.447158186	0	0	0	0	0	0	0	0	0	0	0	0	7.43136378	0	0	0	0
DHX9	0	0	0	0	0	0	6.819544001	6.812913423	6.892094658	6.518514071	6.27875383	6.477121399	0	7.230448947	7.913813858	7.653212523	6.176091549	6.819544001	6.799340618	0	0	0	0	0	0	7.000000043	6.799340618	6.929418977	7.414973365	0	7.176091288	6.431363925	6.342422878	6.778151323	6.380211423	6.146128346	0	8.623249291	0	7.792391697	7.43136378	0	0	0	6.612783963	7.176091288	6.73239384	9.146128036	9.146128036
AHNAK	6.929418977	6.812913423	7.146128067	0	6.397940182	6.414973515	7.255272529	7.176091288	7.20412001	6.939519303	0	0	0	6.612783963	6.880813649	6.556302621	8.278753603	8.342422683	8.342422683	0	7.322219315	7.113943386	0	0	0	0	0	0	0	0	0	7.079181282	8.000000004	7.924279291	7.934498456	7.20412001	0	0	0	8.491361695	8.07918125	0	0	0	7.919078098	9.278753601	8.322219297	9.255272505	8.146128039
AP1B1	7.278753624	7.230448947	7.079181282	0	0	0	6.9731279	6.832508977	6.785329906	7.113943386	6.6020601	0	6.204120254	0	0	0	0	6.806180042	6.740362768	0	0	0	0	6.579783711	6.431363925	7.939519258	7.755874863	7.716003352	7.477121269	7.477121269	7.579783608	7.361727855	7.770852019	7.38021126	7.20412001	7.20412001	0	7.863322866	7.875061269	7.505149992	7.707570185	7.447158047	7.342422701	0	7.799340556	8.785329836	7.653212523	8.924279287	9.041392686
PRDX4	6.380211423	6.799340618	0	0	0	0	7.869231726	7.857332502	7.681241246	7.53147893	7.176091288	7.230448947	7.176091288	0	0	0	7.146128067	7.462398013	7.230448947	7.230448947	7.278753624	6.913813905	0	7.176091288	0	7.959041397	8.176091262	8.380211244	7.414973365	8.000000004	8.000000004	8.643452677	8.176091262	7.079181282	5.698970873	7.763428001	7.447158047	8.863322861	0	8.41497335	8.176091262	0	7.812913363	0	8.623249291	8.845098041	8.39794001	9.041392686	9
BLMH	0	0	0	0	0	7.079181282	0	0	0	0	0	0	0	0	6.995635238	0	0	0	0	6.491361834	0	6.079181608	0	0	0	0	0	0	0	0	0	0	0	0	0	0	0	0	0	0	0	0	7.43136378	7.255272529	0	0	0	0	0
TTLL12	0	0	0	0	0	0	6.477121399	0	0	0	7.113943386	0	0	7.176091288	7.146128067	7.146128067	6.838849154	6.934498502	6.977723651	0	0	0	0	0	7.041392725	7.863322866	7.908485024	0	0	0	0	0	0	7.491361708	0	0	0	0	0	0	0	0	0	0	0	0	7.602060002	8.544068046	8.897627092
DYNC1H1	6.857332557	6.963787875	7.079181282	7.908485024	7.43136378	7.361727855	7.342422701	7.146128067	6.176091549	5.079184865	7.230448947	6.643452775	6.643452775	8.579783598	8.602059992	8.579783598	7.414973365	8.301029998	8.230448924	7.724275878	7.653212523	7.612783867	7.778151258	7.740362697	7.518513953	8.633468457	8.568201725	8.531478918	8.301029998	8.113943356	8.113943356	7.913813858	7.662757841	8.278753603	7.982271238	7.812913363	8.602059992	8.908485019	8.716003344	8.845098041	8.07918125	8.79934055	7.949390012	0	8.000000004	8.763427994	7.869231726	8.949390007	9.041392686
EIF4A2	6.924279338	6.919078145	6.869231778	7.079181282	7.146128067	7.322219315	7.113943386	7.38021126	7.361727855	7.230448947	7.43136378	7.20412001	7.301030017	7.342422701	7.38021126	7.342422701	7.477121269	7.518513953	7.53147893	7.770852019	7.653212523	7.544068057	7.799340556	7.770852019	7.301030017	8.431363766	8.518513941	8.568201725	8.041392689	8.204119985	7.929418931	7.740362697	7.690196089	7.778151258	7.959041397	7.763428001	7.792391697	8.579783598	7.763428001	8.544068046	8.342422683	8.826074803	7.819543942	0	8.041392689	8.72427587	8.146128039	9.531478917	9.707570176
KPNB1	6.633468557	6.79239176	6.99122612	7.000000043	6.568201841	6.986771779	7.491361708	7.491361708	7.041392725	6.826074868	0	0	7.146128067	7.462398013	7.653212523	6.755874932	7.041392725	6.924279338	6.995635238	7.623249301	7.041392725	7.591064618	7.462398013	6.623249394	7.079181282	8.301029998	8.113943356	8.113943356	7.361727855	7.653212523	7.623249301	8.176091262	7.491361708	7.838849097	7.792391697	7.763428001	7.544068057	8.50514998	8.07918125	8.462397999	8.176091262	8.176091262	7.462398013	0	7.53147893	8.778151251	8.113943356	8.755874856	9.041392686
PLEC	0	0	0	6.380211423	6.832508977	6.531479045	6.778151323	6.556302621	6.65321261	0	6.447158186	6.230449177	6.491361834	0	0	6.414973515	6.908485072	6.897627146	6.812913423	0	0	0	0	0	0	0	0	0	0	0	0	7.602060002	7.113943386	7.612783867	7.278753624	0	0	8.342422683	0	7.462398013	7.146128067	0	0	0	8.462397999	8.778151251	0	8.041392689	8.477121256
PPA1	0	0	0	6.491361834	0	0	7.079181282	7.301030017	7.146128067	0	0	0	0	6.716003427	6.65321261	6.763428068	6.99122612	6.755874932	6.763428068	0	0	0	6.431363925	0	0	6.934498502	7.146128067	7.414973365	7.079181282	7.278753624	7.397940026	7.748188035	7.38021126	7.38021126	7.342422701	7.176091288	0	7.079181282	0	7.301030017	0	7.322219315	0	0	7.176091288	8.491361695	7.342422701	8.995635195	9.146128036
PCBP1	7.041392725	7.041392725	7.000000043	0	0	0	7.000000043	6.929418977	7.000000043	7.146128067	0	0	0	0	0	0	6.954242558	7.113943386	6.986771779	6.869231778	7.000000043	6.740362768	7.361727855	6.748188105	6.531479045	8.176091262	8.113943356	8.204119985	8.176091262	8.041392689	8.000000004	8.230448924	7.880813598	7.698970013	8.176091262	7.505149992	7.146128067	8.982271233	0	8.301029998	8.278753603	8.176091262	7.556302513	0	7.897627097	8.892094603	8.146128039	9.146128036	9.079181246
MAPRE1	0	0	0	0	0	0	6.9731279	7.041392725	6.968482995	0	0	0	0	6.361728025	0	0	7.041392725	7.041392725	6.977723651	0	0	0	0	0	0	0	0	0	0	7.462398013	0	7.53147893	0	7.176091288	7.113943386	0	0	0	0	7.812913363	7.863322866	8.113943356	0	0	6.944482722	8.146128039	7.740362697	8.39794001	8.568201725
FSCN1	0	0	0	0	0	0	6.724275952	6.968482995	6.944482722	6.770852085	6.67209795	6.623249394	0	0	0	0	0	0	0	7.176091288	7.146128067	7.079181282	7.579783608	0	0	8.361727838	8.322219297	8.431363766	8.07918125	8.041392689	8.113943356	7.322219315	7.959041397	8.380211244	8.556302502	6.968482995	6.9731279	0	8.041392689	7.792391697	8.041392689	7.113943386	7.079181282	0	7.929418931	9.041392686	7.113943386	9.361727836	9.977723605
CD109	0	0	0	0	0	0	6.342422878	6.591064718	0	6.146128346	0	0	0	0	0	0	0	0	0	0	0	0	0	0	0	7.041392725	0	0	7.113943386	0	7.518513953	6.04139308	7.672097867	7.176091288	7.748188035	6.690196169	0	0	0	0	0	0	7.113943386	0	7.959041397	8.579783598	0	7.724275878	7.832508919
RPS21	0	0	0	0	0	0	0	0	0	0	0	0	0	0	0	0	0	0	0	0	0	0	0	0	0	0	0	0	0	0	0	0	0	0	0	0	0	0	0	0	0	0	0	0	0	0	0	0	0
DDX1	0	0	0	0	0	0	0	0	0	0	6.079181608	0	0	0	0	6.770852085	7.113943386	6.880813649	6.301030213	0	0	0	0	0	0	8.301029998	8.447158033	8.301029998	0	7.602060002	7.397940026	0	0	0	0	0	0	7.301030017	0	0	7.278753624	7.505149992	0	0	0	7.301030017	7.414973365	8.556302502	8.41497335
LRRC59	0	0	0	0	0	0	0	0	0	0	0	0	0	0	0	0	0	0	0	0	0	0	0	0	0	0	0	0	0	0	0	7.278753624	6.491361834	0	0	0	0	0	0	0	7.255272529	0	0	0	0	0	0	7.653212523	8.41497335
OTUB1	0	0	0	0	0	0	0	0	6.447158186	6.361728025	0	0	0	7.623249301	0	7.612783867	6.724275952	0	0	6.643452775	6.799340618	7.176091288	7.079181282	6.591064718	0	7.863322866	7.832508919	7.892094608	7.397940026	0	0	7.342422701	6.9731279	6.491361834	7.041392725	7.079181282	6.99122612	7.662757841	7.20412001	7.698970013	7.342422701	8.113943356	7.447158047	0	7.43136378	8.176091262	7.698970013	8.556302502	9.176091259
PGM2	0	0	0	0	0	0	0	0	0	0	0	0	0	6.477121399	0	0	0	6.27875383	0	0	0	0	0	0	0	0	6.778151323	0	0	0	0	0	0	0	6.95904144	0	7.230448947	7.301030017	7.740362697	7.361727855	7.568201736	7.662757841	6.79239176	0	6.6020601	7.778151258	6.95904144	7.255272529	7.301030017
PDLIM5	0	0	0	0	0	0	6.748188105	6.67209795	6.633468557	6.643452775	0	0	0	0	0	0	0	0	0	0	0	0	0	0	0	0	6.380211423	0	0	0	0	7.079181282	7.462398013	7.079181282	7.361727855	0	0	0	0	0	0	0	0	0	0	8.176091262	6.826074868	7.477121269	0
CNDP2	5.531480194	0	6.361728025	0	0	0	0	0	6.361728025	0	6.380211423	6.230449177	0	6.806180042	6.826074868	0	0	0	0	0	7.491361708	7.53147893	7.724275878	7.041392725	0	8.07918125	8.000000004	7.949390012	7.322219315	0	0	0	0	7.53147893	7.477121269	6.748188105	7.43136378	0	8.113943356	0	7.799340556	8.000000004	6.819544001	0	6.99122612	7.556302513	7.698970013	7.755874863	8.447158033
PSMB7	0	0	0	0	0	0	0	0	0	0	0	0	0	0	0	0	0	0	0	0	0	0	0	0	0	0	0	0	0	0	0	0	0	0	0	0	0	0	0	0	0	0	0	0	0	0	0	0	0
S100A13	0	0	0	0	0	0	6.707570261	6.778151323	7.079181282	6.662757926	0	0	0	0	0	0	6.477121399	5.90309053	0	6.968482995	0	0	0	0	0	0	0	0	0	0	0	0	7.944482677	7.653212523	0	0	0	0	0	0	0	6.414973515	7.342422701	6.612783963	7.397940026	9.255272505	7.568201736	7.832508919	0
PHB2	0	0	0	0	0	0	6.662757926	6.977723651	6.770852085	6.716003427	7.38021126	7.230448947	7.278753624	0	0	0	7.653212523	7.690196089	7.653212523	0	0	0	0	0	0	0	0	0	0	0	0	7.361727855	0	0	0	0	0	0	0	0	0	0	0	0	6.176091549	0	7.20412001	0	0
CCT7	0	0	0	6.880813649	7.255272529	7.079181282	6.579783711	7.20412001	7.041392725	6.505150114	6.892094658	7.041392725	6.934498502	7.255272529	7.591064618	7.53147893	7.146128067	7.079181282	7.255272529	0	7.146128067	7.146128067	0	7.176091288	7.041392725	7.929418931	7.845098046	7.672097867	7.812913363	7.698970013	7.770852019	7.724275878	7.20412001	7.43136378	7.462398013	6.903090041	7.397940026	8.380211244	7.397940026	7.97772361	7.755874863	7.38021126	6.755874932	0	7.653212523	8.568201725	7.491361708	9.113943353	8.875061264
ERP44	0	0	0	0	0	0	7.505149992	7.806179981	7.653212523	7.544068057	7.653212523	7.414973365	7.079181282	0	0	0	0	0	0	0	0	0	0	0	0	0	0	0	7.255272529	0	6.919078145	7.041392725	7.146128067	6.612783963	7.113943386	6.146128346	0	0	7.447158047	0	0	0	0	0	0	7.505149992	6.892094658	0	8.322219297
TMED9	0	0	6.361728025	0	0	0	7.944482677	7.863322866	8.204119985	8.113943356	7.982271238	7.819543942	7.653212523	0	0	0	6.832508977	6.806180042	0	0	0	0	0	0	0	0	0	0	0	0	0	7.806179981	7.623249301	7.278753624	7.568201736	7.414973365	0	0	0	0	0	0	0	0	7.672097867	0	0	7.986771739	0
NIT2	0	0	0	0	0	0	0	0	0	0	0	0	0	6.698970091	6.748188105	6.707570261	0	6.880813649	0	0	0	0	0	0	0	0	0	0	0	0	0	6.531479045	0	0	0	0	0	0	0	0	0	0	0	0	0	0	6.944482722	9.322219295	9
PHPT1	0	0	0	0	0	0	0	0	0	0	0	0	0	0	0	0	6.770852085	6.913813905	0	0	0	0	0	0	0	0	0	0	0	0	0	0	0	0	0	0	0	0	0	0	0	0	0	0	0	0	6.662757926	8.278753603	8.176091262
OLA1	0	6.579783711	6.414973515	0	0	0	0	0	0	7.079181282	0	0	0	7.041392725	7.041392725	6.886490782	7.255272529	7.322219315	7.176091288	6.982271278	6.954242558	7.176091288	7.176091288	6.913813905	6.568201841	8.07918125	7.908485024	7.819543942	0	0	6.929418977	7.591064618	7.20412001	6.939519303	6.612783963	7.041392725	0	0	0	8.230448924	8.176091262	8.612783858	0	0	6.903090041	8.755874856	6.079181608	8.623249291	8.763427994
DPP3	0	0	0	0	6.832508977	6.826074868	0	0	0	0	6.447158186	6.146128346	0	7.732393768	6.380211423	0	0	0	6.681241328	7.079181282	7.079181282	8.041392689	0	6.505150114	6.544068168	8.491361695	8.531478918	8.544068046	8.041392689	8.342422683	8.041392689	7.544068057	6.986771779	7.662757841	7.176091288	7.53147893	7.414973365	7.949390012	8.07918125	8.113943356	7.556302513	8.50514998	6.892094658	0	7.20412001	7.707570185	7.414973365	7.447158047	7.812913363
NUDT5	0	0	0	0	0	0	0	0	0	0	0	0	0	0	0	0	0	0	0	0	0	0	0	0	0	6.9731279	0	0	0	0	0	0	0	0	6.934498502	0	0	0	0	0	0	0	0	0	0	7.785329842	7.556302513	7.880813598	7.740362697
RAB21	6.755874932	7.041392725	7.113943386	0	0	0	6.690196169	7.041392725	7.079181282	0	6.845098102	6.785329906	6.740362768	0	0	0	7.079181282	7.113943386	7.041392725	6.845098102	6.176091549	6.230449177	0	0	0	0	7.491361708	6.770852085	7.000000043	7.397940026	7.53147893	7.544068057	7.38021126	7.146128067	7.662757841	7.079181282	7.361727855	8.113943356	7.556302513	8.431363766	8.041392689	6.698970091	7.53147893	0	7.591064618	8.447158033	7.681241246	8.113943356	7.97772361
PA2G4	6.342422878	0	6.690196169	0	0	0	0	0	6.763428068	6.612783963	0	0	0	0	0	7.000000043	0	6.73239384	7.079181282	0	0	0	0	0	0	7.568201736	7.414973365	7.591064618	0	7.612783867	7.397940026	0	0	7.462398013	7.255272529	0	0	8.230448924	0	7.681241246	7.176091288	0	0	0	6.812913423	6.977723651	7.447158047	9.041392686	9.278753601
VDAC3	0	0	0	0	0	0	7.38021126	7.414973365	7.278753624	7.322219315	7.53147893	7.397940026	7.38021126	0	0	0	7.477121269	7.556302513	7.518513953	0	0	0	0	0	0	0	0	0	0	0	0	6.929418977	6.806180042	5.924279803	6.113943686	6.230449177	0	0	0	0	0	0	0	0	7.230448947	0	7.623249301	0	0
RTCB	0	0	0	0	0	0	0	0	0	0	0	0	0	0	0	0	0	0	0	0	0	0	7.146128067	0	0	6.977723651	7.113943386	7.113943386	6.963787875	0	6.995635238	0	0	7.113943386	0	0	0	7.897627097	0	0	0	7.556302513	0	0	0	7.414973365	7.278753624	8.812913357	8.851258349
RPS24	0	0	0	0	0	0	6.568201841	6.681241328	6.748188105	0	0	6.505150114	0	7.462398013	7.544068057	7.518513953	0	7.851258355	7.826074809	0	0	0	0	5.963788299	6.079181608	0	7.342422701	7.591064618	6.903090041	7.653212523	7.832508919	6.681241328	0	6.322219502	6.04139308	0	0	8.380211244	0	0	7.643452686	0	7.322219315	0	7.681241246	8.462397999	7.755874863	8.880813593	8.826074803
RPL13A	0	0	0	0	0	0	6.643452775	7.079181282	6.939519303	6.963787875	7.146128067	6.447158186	7.301030017	7.20412001	7.176091288	7.255272529	7.079181282	7.176091288	7.000000043	6.447158186	6.591064718	6.255272746	0	0	7.230448947	0	0	0	7.785329842	7.880813598	0	0	0	0	0	0	0	8.113943356	0	0	7.255272529	0	0	0	7.653212523	8.176091262	7.361727855	9.079181246	8.819543936
RPSA	0	0	0	6.982271278	7.322219315	7.079181282	6.716003427	7.146128067	6.724275952	6.65321261	6.568201841	0	7.041392725	7.176091288	7.342422701	7.361727855	7.176091288	7.176091288	7.322219315	7.20412001	6.806180042	7.146128067	0	6.623249394	6.447158186	7.43136378	7.653212523	7.53147893	0	7.477121269	7.462398013	7.934498456	0	6.986771779	7.602060002	6.6020601	7.602060002	8.924279287	7.579783608	8.255272508	8.230448924	8.380211244	7.491361708	0	7.959041397	8.568201725	7.799340556	9.255272505	9.857332496
VDAC2	0	0	0	6.342422878	6.531479045	6.342422878	7.322219315	7.322219315	7.301030017	7.230448947	7.681241246	7.491361708	7.518513953	0	0	0	7.556302513	7.623249301	7.690196089	0	0	0	0	0	0	6.9731279	0	0	0	0	0	7.518513953	6.908485072	7.000000043	6.556302621	7.041392725	0	0	0	0	0	0	0	0	7.568201736	0	7.301030017	0	0
EPPK1	0	0	0	0	0	0	0	0	0	0	0	0	0	0	0	6.73239384	0	0	0	7.041392725	0	0	0	0	0	6.913813905	6.361728025	7.447158047	0	0	0	6.204120254	0	0	6.892094658	0	0	8.322219297	0	0	0	0	6.982271278	0	6.9731279	8.531478918	0	7.995635199	7.785329842
DDX17	0	0	0	0	0	0	0	0	0	0	6.755874932	6.491361834	6.531479045	6.255272746	0	0	0	0	0	0	0	0	0	0	0	0	0	7.255272529	0	7.556302513	7.755874863	6.9731279	0	0	0	0	0	8.342422683	0	0	0	0	0	0	6.698970091	0	6.826074868	8.919078093	8.963787828
PHGDH	6.740362768	6.770852085	7.079181282	0	6.491361834	0	0	0	0	0	0	0	0	6.301030213	6.397940182	6.544068168	7.255272529	7.342422701	7.230448947	8.146128039	8.07918125	8.07918125	8.113943356	7.934498456	7.755874863	8.591064608	8.748188028	8.732393761	8.342422683	8.301029998	8.431363766	8.447158033	7.662757841	7.414973365	7.20412001	7.491361708	0	8.50514998	8.176091262	8.041392689	7.973127858	8.74036269	7.863322866	0	7.556302513	8.623249291	8.07918125	8.623249291	8.380211244
RPS14	0	0	0	0	0	0	0	0	0	0	0	0	0	0	0	0	5.447159582	6.505150114	6.301030213	0	0	0	0	0	0	0	0	0	0	0	0	8.000000004	7.301030017	7.716003352	7.949390012	0	0	8.431363766	0	0	0	0	0	0	7.146128067	7.986771739	0	8.653212515	8.875061264
CTSD	0	0	0	0	0	0	7.079181282	6.903090041	6.755874932	6.85125841	7.38021126	6.698970091	7.146128067	0	0	0	6.740362768	6.748188105	6.919078145	0	0	0	0	0	0	0	0	0	0	0	0	0	7.255272529	6.95904144	6.633468557	0	0	8.50514998	7.892094608	8.113943356	0	0	0	0	7.755874863	7.973127858	7.707570185	8.322219297	8.518513941
CTNNB1	7.079181282	7.113943386	7.079181282	0	0	0	7.838849097	8.113943356	7.748188035	7.301030017	7.38021126	7.20412001	7.230448947	6.838849154	7.041392725	8.204119985	0	0	0	0	7.079181282	7.000000043	6.875061321	0	0	7.20412001	7.38021126	7.591064618	6.505150114	0	0	8.612783858	8.113943356	7.778151258	8.204119985	7.176091288	7.301030017	7.832508919	0	7.986771739	8.342422683	0	6.963787875	7.255272529	8.544068046	10.04139269	7.414973365	9.204119983	8.39794001
GSR	0	0	0	0	0	0	6.146128346	0	6.322219502	0	5.954242992	6.27875383	5.591065721	0	0	0	6.431363925	6.146128346	6.681241328	0	0	0	0	0	0	0	0	0	0	0	0	8.255272508	7.505149992	0	0	7.079181282	0	0	0	0	0	0	6.518514071	0	7.447158047	8.230448924	7.000000043	0	0
HSPE1	0	0	0	0	0	0	6.707570261	6.99122612	6.977723651	6.724275952	7.301030017	6.785329906	7.041392725	0	0	0	7.681241246	7.748188035	7.707570185	0	0	0	0	0	0	0	0	0	0	0	0	7.944482677	7.838849097	7.612783867	7.505149992	7.903089992	0	0	0	7.602060002	7.732393768	0	7.462398013	0	8.278753603	8.230448924	7.20412001	0	0
TGFBI	0	0	0	0	0	0	7.301030017	6.95904144	7.079181282	6.690196169	6.880813649	6.518514071	0	0	0	0	0	0	0	6.913813905	6.67209795	7.000000043	6.838849154	0	0	0	0	6.505150114	6.579783711	7.041392725	0	6.505150114	0	8.255272508	6.380211423	7.301030017	0	0	9.176091259	7.716003352	7.875061269	8.602059992	8.322219297	0	8.301029998	8.204119985	0	7.929418931	8.342422683
UGP2	0	0	0	7.146128067	7.20412001	7.255272529	0	0	0	0	0	0	0	0	0	0	0	0	0	6.812913423	7.000000043	6.770852085	7.041392725	7.041392725	6.845098102	8.146128039	8.255272508	7.778151258	7.944482677	7.832508919	7.716003352	8.000000004	7.041392725	7.322219315	7.176091288	7.579783608	7.462398013	8.322219297	8.447158033	8.447158033	7.662757841	8.544068046	7.892094608	0	7.672097867	8.146128039	7.477121269	8.230448924	7.934498456
PCK2	0	0	0	0	0	0	0	0	0	0	6.724275952	6.380211423	6.505150114	0	0	0	0	0	0	0	0	0	0	0	0	0	0	0	0	0	0	0	0	0	0	0	0	0	0	0	0	0	0	0	0	0	0	0	0
SNAP23	0	0	0	0	0	0	6.724275952	6.838849154	6.806180042	0	0	0	0	0	0	0	0	0	0	0	0	7.113943386	0	0	6.785329906	0	0	0	0	7.397940026	0	0	7.447158047	6.85125841	7.748188035	0	0	0	0	0	0	0	0	0	0	8.146128039	7.544068057	0	0
EPB41L2	0	0	0	0	0	0	7.041392725	7.230448947	7.113943386	6.301030213	0	0	0	6.995635238	6.944482722	6.939519303	7.342422701	7.414973365	7.361727855	7.544068057	7.301030017	7.342422701	7.301030017	6.939519303	6.924279338	7.755874863	7.732393768	7.778151258	0	0	0	0	7.633468466	7.518513953	7.869231726	0	7.690196089	0	0	7.662757841	8.07918125	0	0	0	0	0	7.944482677	8.041392689	8.113943356
ADA	0	0	0	0	0	0	0	0	0	0	0	0	0	0	0	0	0	0	0	0	0	0	0	0	0	0	0	0	0	0	0	0	0	0	0	0	0	0	0	0	0	0	0	0	0	0	0	0	0
CTNNA1	7.518513953	7.477121269	7.544068057	0	0	7.041392725	7.924279291	7.892094608	7.812913363	7.770852019	7.079181282	6.544068168	6.908485072	7.079181282	7.690196089	8.041392689	0	0	0	6.85125841	6.716003427	6.568201841	0	0	0	7.672097867	7.763428001	7.755874863	7.322219315	7.230448947	7.38021126	8.748188028	0	8.301029998	8.431363766	0	0	0	0	0	8.230448924	0	0	0	8.491361695	9.79934055	7.53147893	8.591064608	8.07918125
RAP2B	7.880813598	7.892094608	7.732393768	0	0	0	7.230448947	7.041392725	7.113943386	7.230448947	6.819544001	6.929418977	6.9731279	0	0	0	6.633468557	6.491361834	6.748188105	0	0	0	0	0	0	0	0	7.301030017	0	0	0	7.361727855	8.113943356	7.230448947	7.763428001	6.897627146	7.20412001	7.556302513	0	8.176091262	7.908485024	0	0	0	7.845098046	9.041392686	8.230448924	8.39794001	0
EHD4	6.845098102	6.95904144	6.86332292	6.832508977	6.826074868	6.799340618	7.230448947	7.230448947	7.230448947	7.255272529	6.857332557	6.623249394	6.531479045	6.838849154	6.845098102	6.857332557	7.176091288	7.255272529	7.20412001	7.230448947	6.934498502	7.000000043	6.633468557	0	0	7.43136378	7.623249301	7.869231726	7.041392725	7.556302513	7.568201736	7.477121269	7.690196089	7.732393768	7.518513953	7.38021126	7.579783608	7.414973365	7.322219315	7.973127858	8.255272508	8.113943356	7.591064618	0	7.838849097	8.977723606	8.986771735	8.477121256	8.653212515
PACSIN2	0	0	6.380211423	0	0	0	6.397940182	6.612783963	6.79239176	0	0	0	0	0	0	0	0	0	6.462398148	0	0	0	0	0	0	7.146128067	7.623249301	7.602060002	6.880813649	0	7.633468466	7.633468466	7.556302513	6.477121399	0	0	0	7.806179981	0	0	8.041392689	0	0	0	6.86332292	8.491361695	8.176091262	0	0
RAP2C	7.748188035	7.763428001	7.770852019	0	0	0	7.113943386	6.982271278	6.838849154	6.716003427	6.579783711	6.662757926	6.544068168	0	0	0	6.6020601	6.65321261	6.763428068	5.919078616	0	0	0	0	0	7.397940026	6.414973515	7.20412001	7.079181282	0	6.913813905	6.826074868	8.07918125	6.698970091	7.301030017	6.67209795	7.20412001	8.07918125	7.255272529	7.908485024	7.832508919	7.716003352	0	0	7.579783608	8.934498452	7.799340556	8.755874856	0
CAD	0	0	0	7.041392725	6.845098102	6.690196169	0	0	0	0	6.431363925	0	0	0	7.079181282	6.681241328	6.681241328	6.982271278	6.724275952	6.447158186	6.518514071	0	6.255272746	5.908485555	5.322221363	6.79239176	7.041392725	6.986771779	7.113943386	7.20412001	7.20412001	7.146128067	6.079181608	7.20412001	7.477121269	6.748188105	6.99122612	8.39794001	0	7.770852019	7.20412001	6.903090041	7.176091288	0	7.113943386	8.230448924	7.447158047	8.278753603	8.851258349
PSMC5	0	0	0	0	0	0	0	0	0	0	0	0	0	0	0	0	0	0	0	6.95904144	6.9731279	7.414973365	6.95904144	0	6.462398148	7.690196089	7.681241246	7.763428001	0	6.556302621	7.079181282	7.690196089	6.919078145	7.568201736	7.602060002	7.43136378	0	7.963787832	0	7.732393768	0	7.919078098	0	0	7.079181282	7.041392725	0	8.591064608	8.633468457
CPNE3	6.799340618	6.819544001	6.845098102	0	0	0	7.113943386	7.041392725	7.041392725	6.832508977	6.301030213	0	0	0	0	0	6.755874932	6.477121399	7.041392725	0	0	0	0	0	0	0	0	0	6.826074868	0	0	7.079181282	7.633468466	7.724275878	7.43136378	7.079181282	0	8.113943356	0	8.000000004	0	0	0	0	7.724275878	8.491361695	7.505149992	8.863322861	0
FLOT1	7.255272529	7.255272529	6.799340618	7.361727855	7.278753624	6.819544001	7.230448947	7.230448947	7.322219315	7.176091288	6.95904144	6.748188105	6.785329906	6.95904144	7.000000043	6.986771779	7.462398013	7.361727855	7.278753624	7.959041397	8.113943356	8.113943356	7.643452686	7.857332502	7.740362697	8.579783598	8.491361695	8.322219297	8.662757833	8.662757833	8.602059992	8.278753603	8.146128039	8.462397999	8.07918125	8.41497335	8.113943356	8.322219297	7.716003352	8.672097859	8.612783858	8.770852012	8.07918125	0	8.113943356	8.662757833	7.903089992	7.880813598	0
TGM2	0	0	0	0	0	0	8.707570177	8.681241238	8.07918125	8.176091262	0	0	0	0	0	0	0	0	0	0	0	0	0	0	0	0	0	0	0	0	0	0	7.079181282	6.875061321	8.531478918	7.113943386	0	0	0	8.301029998	7.146128067	0	0	0	7.963787832	8.204119985	0	7.845098046	0
PSMC2	6.146128346	0	6.531479045	0	0	0	0	0	0	0	0	0	0	0	0	0	0	0	6.690196169	6.591064718	0	7.518513953	0	0	0	7.681241246	7.826074809	7.447158047	6.886490782	7.230448947	7.462398013	7.278753624	7.301030017	6.934498502	7.146128067	6.380211423	6.832508977	8.255272508	0	7.832508919	7.568201736	8.361727838	7.041392725	0	7.255272529	7.662757841	7.301030017	8.623249291	8.79239169
ANXA11	7.079181282	6.886490782	6.875061321	0	0	0	8.255272508	8.230448924	8.255272508	8.204119985	7.763428001	7.556302513	7.462398013	0	0	0	6.770852085	6.740362768	0	6.397940182	6.6020601	6.778151323	0	6.113943686	6.146128346	7.113943386	7.255272529	6.986771779	7.875061269	7.643452686	7.505149992	8.041392689	8.230448924	7.986771739	7.973127858	7.792391697	7.361727855	8.431363766	0	8.230448924	7.612783867	7.897627097	7.38021126	0	7.986771739	8.518513941	8.342422683	9.278753601	7.973127858
PSMD7	0	0	0	0	0	0	7.477121269	0	0	0	0	7.919078098	6.301030213	8.07918125	8.07918125	8.361727838	0	0	0	0	6.67209795	0	0	0	0	7.518513953	7.342422701	7.53147893	0	7.43136378	7.301030017	6.447158186	0	6.85125841	6.113943686	0	0	8.342422683	8.041392689	8.278753603	6.799340618	7.838849097	6.892094658	0	7.602060002	7.973127858	7.591064618	8.72427587	8.72427587
RAD23B	0	0	0	0	0	0	0	0	0	0	0	0	0	0	0	0	0	0	0	0	0	0	0	0	0	0	0	0	0	0	0	0	7.716003352	0	7.079181282	0	0	0	0	0	0	0	0	0	0	8.204119985	0	0	0
PRPS1	0	0	0	0	6.740362768	6.707570261	0	6.623249394	0	0	0	0	0	7.113943386	6.892094658	6.934498502	7.146128067	7.041392725	6.99122612	0	0	0	0	6.361728025	0	7.361727855	6.544068168	7.653212523	0	6.919078145	7.146128067	7.20412001	7.000000043	7.278753624	6.716003427	6.770852085	0	8.176091262	7.653212523	0	0	7.556302513	0	0	0	7.897627097	0	8.518513941	8.255272508
PSMC1	7.176091288	7.113943386	7.176091288	7.079181282	6.9731279	7.041392725	0	0	0	0	0	6.65321261	6.414973515	0	0	6.826074868	0	6.929418977	0	7.176091288	7.113943386	7.230448947	7.146128067	0	0	8.041392689	8.07918125	8.176091262	0	7.954242514	0	7.113943386	7.278753624	7.778151258	7.000000043	6.623249394	0	8.361727838	0	8.041392689	7.477121269	8.07918125	6.886490782	0	7.176091288	0	7.176091288	8.763427994	8.968482949
PSMC6	0	0	0	6.531479045	6.518514071	6.568201841	0	0	0	0	0	0	0	6.462398148	6.505150114	0	6.176091549	6.579783711	0	6.85125841	0	0	0	0	0	7.968482953	7.903089992	7.97772361	7.462398013	7.653212523	7.602060002	7.255272529	7.146128067	6.857332557	6.908485072	6.681241328	7.414973365	8.041392689	0	7.785329842	7.681241246	8.230448924	0	0	7.20412001	7.812913363	7.278753624	8.770852012	8.806179975
CCT2	6.954242558	6.819544001	6.934498502	7.301030017	7.301030017	7.146128067	6.977723651	7.079181282	0	6.73239384	7.278753624	5.556303707	7.301030017	7.643452686	7.662757841	7.643452686	7.255272529	7.397940026	7.20412001	6.9731279	0	0	7.447158047	7.322219315	7.041392725	7.755874863	8.000000004	7.944482677	7.944482677	8.230448924	7.698970013	7.838849097	7.342422701	7.602060002	7.913813858	7.146128067	7.662757841	8.653212515	8.000000004	8.176091262	7.892094608	8.255272508	7.43136378	0	7.690196089	8.690196081	7.681241246	9.544068044	9.041392686
DCTN2	0	0	0	0	0	0	0	0	0	0	0	0	0	0	0	0	0	0	0	0	0	0	0	0	0	7.146128067	7.041392725	0	0	7.113943386	7.255272529	6.954242558	6.612783963	7.041392725	7.146128067	6.568201841	0	0	0	0	0	0	0	0	0	7.653212523	7.38021126	7.505149992	0
FLOT2	6.531479045	6.447158186	6.397940182	7.361727855	6.939519303	7.113943386	7.38021126	7.43136378	7.322219315	7.230448947	7.041392725	6.623249394	6.591064718	7.176091288	7.20412001	7.20412001	7.556302513	7.662757841	7.518513953	7.653212523	7.623249301	7.633468466	7.579783608	7.255272529	6.908485072	7.908485024	8.000000004	7.968482953	8.176091262	8.176091262	8.176091262	7.845098046	8.041392689	8.041392689	7.919078098	7.505149992	7.99122608	8.204119985	8.07918125	8.531478918	7.886490731	8.361727838	7.913813858	0	8.113943356	8.591064608	7.819543942	8.07918125	0
PSMD6	0	6.176091549	0	0	0	0	0	0	0	0	0	0	0	6.6020601	6.908485072	0	6.897627146	6.86332292	0	0	0	0	0	0	0	7.176091288	7.176091288	7.000000043	0	0	0	0	0	7.361727855	6.9731279	0	7.079181282	8.176091262	7.591064618	8.041392689	0	7.681241246	0	0	7.041392725	7.041392725	6.230449177	8.812913357	8.602059992
PSMD1	0	0	0	0	0	0	0	0	0	6.000000434	0	0	0	0	0	6.301030213	6.623249394	7.230448947	0	0	0	0	0	0	0	7.579783608	7.633468466	7.732393768	6.954242558	0	0	0	0	0	6.826074868	0	0	8.380211244	7.361727855	7.602060002	0	8.041392689	0	0	7.322219315	7.851258355	6.716003427	8.653212515	8.732393761
CPNE1	0	0	0	7.041392725	7.079181282	7.041392725	7.041392725	6.963787875	7.000000043	6.740362768	7.113943386	6.995635238	6.924279338	0	0	0	6.785329906	6.79239176	6.892094658	0	0	5.919078616	0	0	0	6.740362768	0	6.662757926	7.623249301	7.041392725	7.146128067	7.623249301	6.886490782	7.230448947	7.301030017	6.204120254	6.785329906	8.000000004	0	8.07918125	7.806179981	0	0	0	7.230448947	8.041392689	7.041392725	8.342422683	8.255272508
RUVBL2	0	0	0	0	0	0	0	0	0	0	0	0	0	0	0	7.556302513	0	0	0	0	0	0	0	0	0	6.85125841	6.919078145	7.230448947	0	0	0	7.113943386	6.977723651	7.113943386	6.886490782	0	0	7.934498456	0	7.53147893	0	7.255272529	6.763428068	0	6.518514071	8.230448924	6.477121399	8.672097859	8.50514998
PSMC3	0	0	0	0	0	0	0	0	0	0	0	0	0	0	0	0	0	0	6.995635238	0	6.414973515	6.380211423	6.27875383	5.908485555	0	7.505149992	7.568201736	7.819543942	7.544068057	0	0	7.113943386	0	6.770852085	6.6020601	6.85125841	7.176091288	8.531478918	7.919078098	7.913813858	7.255272529	8.41497335	6.690196169	0	7.397940026	7.838849097	7.43136378	8.875061264	9.041392686
SOD1	0	0	0	7.041392725	0	7.041392725	7.591064618	7.792391697	7.176091288	7.612783867	7.113943386	6.95904144	6.9731279	7.414973365	7.491361708	7.491361708	6.690196169	7.544068057	7.462398013	0	0	0	0	0	0	0	0	0	0	7.322219315	7.397940026	8.07918125	7.681241246	7.301030017	7.707570185	0	0	0	0	0	0	0	0	0	7.755874863	8.681241238	8.146128039	8.322219297	0
RPS17	0	0	0	0	0	0	0	0	0	0	0	0	0	7.079181282	0	0	7.041392725	6.9731279	6.623249394	0	0	0	0	0	0	0	0	0	0	0	0	7.38021126	0	0	0	0	0	8.301029998	0	0	0	0	0	0	7.342422701	0	0	8.204119985	8.716003344
RALA	6.518514071	6.431363925	7.505149992	0	0	0	7.662757841	7.748188035	7.755874863	7.477121269	7.146128067	6.977723651	7.230448947	7.397940026	7.230448947	6.968482995	7.462398013	7.230448947	7.342422701	6.995635238	6.892094658	0	0	0	6.880813649	7.591064618	7.079181282	7.43136378	7.53147893	7.643452686	7.672097867	7.698970013	7.986771739	8.113943356	7.826074809	7.414973365	6.85125841	7.38021126	0	7.491361708	8.000000004	0	0	7.477121269	7.944482677	9.380211242	8.000000004	8.623249291	0
GRB2	0	0	0	0	0	0	0	0	0	0	0	0	0	0	0	0	0	0	0	0	0	0	0	0	0	7.278753624	7.000000043	7.342422701	6.707570261	7.20412001	7.255272529	7.462398013	7.397940026	7.113943386	7.113943386	0	0	0	0	0	7.544068057	0	6.886490782	0	7.397940026	8.113943356	7.414973365	7.43136378	0
ELAVL1	0	0	0	0	0	0	0	0	0	0	0	0	0	0	0	0	0	0	0	0	0	0	0	0	0	0	0	0	0	0	0	0	0	0	0	0	0	8.146128039	0	0	0	0	0	0	0	0	0	8.230448924	8.230448924
HNRNPAB	0	0	0	0	0	0	0	0	0	6.079181608	0	0	0	0	0	0	0	0	0	0	0	0	0	0	5.778151974	0	0	0	6.968482995	7.556302513	7.568201736	0	0	7.000000043	6.544068168	0	0	7.278753624	0	0	7.146128067	0	0	0	6.934498502	7.995635199	0	8.662757833	8.838849091
ANXA3	0	0	0	0	0	0	7.602060002	7.643452686	7.612783867	7.38021126	7.556302513	7.278753624	7.342422701	0	0	0	6.6020601	7.079181282	0	0	0	0	0	0	0	0	0	0	0	0	0	0	7.041392725	0	0	0	0	0	0	0	0	0	0	0	0	0	0	0	0
ANXA6	7.869231726	7.851258355	8.230448924	6.845098102	6.85125841	6.857332557	7.662757841	7.662757841	7.361727855	7.556302513	0	0	0	0	0	0	7.518513953	7.544068057	7.544068057	7.146128067	6.869231778	6.799340618	6.85125841	5.95904187	6.698970091	7.568201736	7.792391697	7.612783867	6.949390055	7.857332502	7.792391697	7.414973365	7.079181282	7.505149992	6.6020601	7.612783867	0	7.892094608	7.579783608	8.602059992	8.447158033	0	7.255272529	0	7.954242514	8.07918125	8.255272508	8.681241238	8.431363766
APMAP	0	0	0	0	0	0	7.892094608	7.929418931	7.857332502	7.698970013	8.041392689	7.568201736	7.785329842	0	0	0	6.544068168	6.79239176	6.531479045	0	0	0	0	0	0	0	0	0	0	6.826074868	0	0	7.602060002	0	0	0	0	0	0	0	0	0	0	0	7.361727855	7.230448947	0	0	0
ESD	0	0	7.278753624	0	0	0	0	0	0	0	0	0	0	0	0	0	0	0	0	0	0	0	0	0	0	0	8.74036269	8.845098041	0	7.963787832	8.041392689	0	0	0	6.230449177	0	0	0	0	0	7.041392725	8.556302502	0	0	0	7.707570185	7.255272529	9.255272505	9.342422681
TPP1	0	0	0	0	0	0	0	0	0	0	0	0	0	0	0	0	0	8.113943356	0	0	0	0	0	0	0	0	0	0	0	0	0	0	0	0	0	0	0	0	0	0	0	0	0	0	0	0	7.041392725	0	0
RPLP2	0	0	0	7.113943386	7.146128067	7.113943386	7.079181282	0	7.079181282	6.968482995	0	0	0	0	7.361727855	7.176091288	7.041392725	7.301030017	7.544068057	6.79239176	0	6.6020601	7.322219315	6.477121399	6.86332292	7.672097867	7.556302513	7.857332502	8.113943356	7.732393768	8.07918125	7.919078098	7.505149992	7.53147893	7.43136378	7.447158047	0	8.880813593	8.000000004	7.982271238	7.903089992	7.623249301	0	0	7.079181282	8.568201725	7.986771739	9.447158031	9.806179974
CDK1	7.176091288	6.919078145	7.230448947	0	0	0	6.531479045	0	6.113943686	0	0	0	0	0	6.462398148	0	6.447158186	6.681241328	6.518514071	0	6.924279338	0	0	0	0	0	0	7.643452686	6.079181608	7.924279291	7.934498456	6.698970091	7.462398013	7.724275878	6.643452775	0	0	7.505149992	0	7.770852019	0	6.929418977	0	0	6.505150114	8.662757833	7.716003352	8.531478918	8.380211244
APRT	0	0	0	0	0	0	6.579783711	0	5.869232307	0	6.716003427	6.716003427	6.73239384	7.041392725	7.079181282	7.113943386	6.770852085	6.86332292	7.079181282	0	7.342422701	0	0	0	0	0	0	0	0	7.397940026	7.278753624	7.845098046	0	7.20412001	7.079181282	6.579783711	0	8.812913357	0	7.707570185	0	0	0	0	7.342422701	8.672097859	7.612783867	8.176091262	9.041392686
LGALS1	7.301030017	7.000000043	7.000000043	6.939519303	6.845098102	7.230448947	7.342422701	7.447158047	7.322219315	6.838849154	0	0	0	0	0	0	7.491361708	7.397940026	7.518513953	6.9731279	6.982271278	7.041392725	0	0	0	6.85125841	7.20412001	7.342422701	7.954242514	8.041392689	8.000000004	0	8.07918125	8.74036269	6.95904144	7.342422701	7.913813858	8.39794001	8.707570177	8.826074803	8.95424251	7.908485024	0	0	8.255272508	9.397940009	9.079181246	8.518513941	8.924279287
TOP1	0	0	0	0	0	0	0	0	0	0	6.662757926	0	0	7.43136378	7.322219315	7.000000043	0	0	0	0	0	0	0	0	0	6.944482722	0	0	0	0	0	0	0	0	0	0	0	7.43136378	0	7.579783608	0	0	0	0	0	0	0	8.623249291	8.301029998
XRCC5	0	0	0	6.95904144	7.322219315	7.000000043	7.146128067	6.716003427	6.447158186	5.255274918	6.919078145	7.079181282	6.897627146	7.342422701	7.959041397	7.342422701	6.949390055	7.146128067	7.20412001	0	0	0	0	0	0	6.857332557	7.000000043	7.000000043	7.544068057	7.491361708	7.43136378	6.908485072	0	7.041392725	0	0	0	9.146128036	0	7.740362697	0	0	0	0	6.977723651	7.462398013	6.826074868	8.633468457	9.176091259
PFKL	7.146128067	6.892094658	6.954242558	6.785329906	6.778151323	6.770852085	6.826074868	6.977723651	6.643452775	7.20412001	7.000000043	7.20412001	7.255272529	6.724275952	7.000000043	6.799340618	7.146128067	7.113943386	7.000000043	7.799340556	7.43136378	7.477121269	0	6.838849154	6.886490782	8.041392689	7.986771739	8.041392689	7.556302513	7.53147893	7.342422701	7.53147893	0	7.462398013	6.763428068	0	7.414973365	8.361727838	7.518513953	7.869231726	0	8.361727838	7.322219315	0	7.579783608	7.863322866	7.079181282	8.72427587	8.653212515
NCL	0	0	0	0	0	0	0	0	0	0	0	0	0	0	7.113943386	0	0	0	0	0	0	0	0	0	0	0	0	0	7.041392725	6.86332292	6.924279338	6.518514071	0	6.845098102	0	0	0	7.851258355	0	0	0	0	0	0	7.230448947	0	6.755874932	8.949390007	8.672097859
HK1	0	0	0	7.000000043	6.633468557	6.65321261	0	0	0	0	0	0	0	0	7.176091288	0	6.716003427	7.146128067	7.079181282	0	0	0	0	0	0	0	0	0	0	0	6.113943686	0	0	0	0	0	7.53147893	7.342422701	0	7.146128067	0	0	0	0	0	0	6.995635238	8.07918125	0
ACP1	0	0	0	0	0	0	0	0	0	0	0	0	0	6.799340618	6.812913423	6.748188105	0	0	0	0	0	0	7.361727855	6.778151323	0	8.255272508	8.176091262	8.255272508	0	7.672097867	0	7.568201736	0	0	0	0	0	8.278753603	0	7.778151258	0	8.41497335	7.20412001	0	0	8.568201725	6.79239176	8.41497335	8.982271233
HMGB2	0	0	0	0	0	0	0	0	0	0	0	0	0	0	0	0	0	0	0	0	0	0	0	0	0	0	0	0	0	0	0	0	0	0	0	0	0	0	0	0	0	0	0	0	0	0	0	8.322219297	0
LAP3	0	0	0	0	0	0	7.20412001	7.041392725	6.806180042	6.908485072	6.447158186	0	6.716003427	0	0	0	6.806180042	6.65321261	6.79239176	0	6.73239384	0	0	0	0	7.322219315	7.397940026	7.633468466	6.612783963	0	0	6.85125841	0	5.939519752	6.875061321	0	7.176091288	0	8.146128039	7.672097867	7.556302513	7.361727855	0	0	7.041392725	8.146128039	7.505149992	8.301029998	8.875061264
ERP29	0	0	0	0	0	0	7.707570185	7.770852019	7.799340556	7.653212523	7.832508919	7.770852019	7.857332502	0	0	0	0	6.690196169	6.623249394	0	0	0	0	0	0	0	0	0	0	0	0	7.633468466	7.38021126	6.505150114	5.897627641	6.73239384	0	0	0	0	0	0	0	0	7.653212523	0	7.255272529	7.623249301	0
ATIC	7.230448947	7.826074809	7.792391697	7.342422701	7.20412001	7.176091288	6.826074868	6.857332557	6.707570261	6.698970091	6.982271278	0	6.397940182	7.361727855	7.000000043	7.113943386	7.43136378	7.322219315	7.43136378	7.799340556	7.748188035	7.724275878	8.255272508	8.146128039	8.000000004	8.919078093	8.949390007	8.770852012	8.230448924	7.908485024	8.204119985	7.908485024	7.778151258	7.690196089	7.672097867	7.556302513	7.643452686	8.361727838	8.342422683	8.544068046	7.875061269	9.113943353	7.892094608	0	7.732393768	8.491361695	7.698970013	8.531478918	8.913813853
NAMPT	0	0	0	0	0	0	6.875061321	6.963787875	7.041392725	6.86332292	0	0	0	0	0	0	0	6.73239384	0	0	0	0	0	0	0	0	0	0	0	0	0	7.97772361	7.53147893	7.278753624	6.748188105	7.20412001	0	0	0	7.99122608	0	0	0	0	8.204119985	7.959041397	7.857332502	8.653212515	8.113943356
PSMC4	0	0	0	0	0	0	0	0	0	0	0	0	0	0	0	6.568201841	0	0	0	0	0	0	0	0	0	8.176091262	8.204119985	8.041392689	7.785329842	7.53147893	7.447158047	8.113943356	7.113943386	8.146128039	7.732393768	8.041392689	6.477121399	8.342422683	7.544068057	7.681241246	7.146128067	7.908485024	0	0	0	7.612783867	0	8.732393761	8.690196081
COPA	0	0	0	0	0	0	0	6.447158186	0	0	6.707570261	6.65321261	6.612783963	0	0	0	6.146128346	0	0	0	0	0	0	0	0	7.176091288	7.361727855	7.113943386	0	0	0	6.690196169	0	6.724275952	7.000000043	0	0	8.113943356	7.643452686	7.662757841	7.477121269	7.863322866	0	0	7.397940026	7.819543942	6.431363925	8.778151251	9.146128036
SUB1	0	0	0	0	0	0	0	0	0	0	0	0	0	0	0	0	0	0	0	0	0	0	0	0	0	0	0	0	0	0	0	0	0	0	6.707570261	0	0	0	0	0	0	0	0	0	0	0	0	9	8.819543936
CSE1L	0	0	0	0	6.954242558	6.977723651	8.176091262	6.903090041	6.65321261	7.954242514	0	0	6.255272746	7.041392725	7.079181282	7.544068057	6.612783963	7.079181282	6.986771779	0	6.568201841	0	0	0	0	7.732393768	7.477121269	7.322219315	7.397940026	0	7.079181282	7.230448947	8.07918125	6.462398148	6.230449177	6.65321261	8.892094603	8.113943356	7.778151258	7.959041397	7.38021126	7.755874863	0	0	7.041392725	8.176091262	7.690196089	8.72427587	8.934498452
MTPN	0	0	0	6.690196169	6.968482995	6.95904144	0	0	0	0	0	0	0	7.146128067	7.176091288	7.113943386	7.278753624	7.230448947	0	5.929419437	0	0	0	0	0	7.568201736	7.690196089	7.838849097	7.000000043	7.579783608	7.322219315	7.113943386	6.944482722	7.20412001	6.643452775	6.778151323	7.38021126	0	7.724275878	7.903089992	0	0	0	0	7.230448947	8.041392689	7.857332502	8.623249291	8.919078093
ACTR1A	0	0	0	0	0	0	0	0	0	6.963787875	0	0	0	6.447158186	6.397940182	0	0	6.857332557	0	0	6.079181608	0	0	0	0	7.602060002	7.643452686	7.875061269	7.447158047	6.99122612	7.146128067	7.041392725	0	6.880813649	7.20412001	0	0	7.919078098	8.113943356	8.230448924	7.799340556	0	0	0	0	7.908485024	7.681241246	9.041392686	9.322219295
RPL15	0	0	0	0	0	0	0	6.716003427	0	0	6.414973515	0	6.65321261	7.681241246	0	0	7.342422701	7.301030017	6.662757926	0	0	0	0	0	0	6.748188105	7.518513953	6.903090041	6.755874932	7.838849097	7.863322866	7.913813858	6.491361834	7.602060002	7.113943386	7.361727855	6.85125841	8.939519253	0	8.000000004	7.851258355	7.623249301	7.20412001	0	8.041392689	7.986771739	7.176091288	9.301029996	9.041392686
PPP1CA	6.698970091	6.477121399	6.579783711	7.322219315	7.255272529	7.255272529	7.491361708	7.53147893	7.556302513	7.397940026	7.361727855	7.041392725	6.832508977	7.113943386	7.322219315	7.176091288	7.579783608	7.255272529	7.518513953	6.99122612	6.954242558	6.612783963	0	5.875061842	0	7.681241246	7.477121269	7.591064618	7.653212523	7.477121269	7.518513953	7.832508919	7.806179981	7.716003352	7.819543942	7.230448947	7.230448947	8.447158033	0	8.322219297	8.07918125	8.000000004	7.544068057	0	8.041392689	9.113943353	8.531478918	9.079181246	9.380211242
PPP1CB	0	0	0	7.322219315	7.255272529	7.255272529	7.491361708	7.53147893	7.556302513	7.397940026	7.322219315	6.99122612	0	7.113943386	7.322219315	7.176091288	7.579783608	7.255272529	7.518513953	6.857332557	0	6.612783963	0	5.875061842	0	7.681241246	7.477121269	7.623249301	7.653212523	7.477121269	7.518513953	7.806179981	7.748188035	7.361727855	7.812913363	7.000000043	7.322219315	8.41497335	0	8.322219297	8.146128039	8.000000004	7.544068057	0	8.041392689	9.113943353	8.531478918	9.079181246	9.361727836
RPL7A	7.041392725	7.000000043	6.982271278	7.518513953	7.491361708	0	7.633468466	7.146128067	6.716003427	6.623249394	7.799340556	0	0	8.146128039	8.176091262	8.361727838	7.361727855	7.732393768	7.748188035	6.85125841	0	0	6.869231778	6.886490782	6.963787875	7.643452686	7.662757841	7.568201736	7.880813598	8.041392689	8.000000004	8.07918125	6.949390055	7.447158047	7.908485024	7.301030017	7.623249301	9.041392686	0	7.863322866	7.812913363	0	7.041392725	0	7.556302513	8.07918125	0	9.146128036	9.146128036
HNRNPU	0	0	0	0	0	0	0	0	0	0	6.806180042	0	0	7.000000043	0	0	0	0	0	0	0	0	0	0	0	7.20412001	0	0	7.944482677	7.939519258	8.146128039	8.000000004	6.544068168	6.799340618	6.778151323	0	0	8.716003344	0	7.959041397	7.397940026	0	6.908485072	0	7.477121269	0	0	8.903089988	8.832508913
MVP	0	0	0	7.20412001	7.301030017	7.785329842	8.176091262	8.230448924	8.204119985	8.41497335	9.041392686	8.462397999	8.778151251	8.113943356	8.204119985	8.041392689	0	0	0	0	0	0	0	0	0	7.230448947	6.770852085	7.041392725	0	0	0	8.633468457	7.99122608	8.72427587	8.113943356	7.973127858	0	0	8.41497335	8.72427587	8.39794001	0	7.38021126	0	8.908485019	8.908485019	7.897627097	9.447158031	9.322219295
HMGB1	0	0	0	0	0	0	0	0	0	0	0	0	0	0	0	0	0	0	0	0	0	0	0	0	0	0	0	0	8.07918125	7.361727855	7.556302513	7.176091288	0	7.146128067	0	7.255272529	0	8.041392689	0	0	0	0	6.633468557	0	0	0	0	8.934498452	8.146128039
VAT1	0	0	0	0	0	0	7.230448947	7.255272529	7.278753624	7.113943386	0	0	0	0	0	0	6.698970091	6.73239384	6.612783963	0	0	0	0	0	0	0	7.491361708	7.477121269	0	0	0	0	7.342422701	7.079181282	0	0	0	0	0	8.041392689	8.07918125	8.000000004	0	0	7.301030017	8.230448924	8.653212515	8.462397999	8.579783598
VPS29	0	0	0	0	0	0	0	0	0	0	0	0	0	0	0	0	0	0	0	0	0	0	0	0	0	7.518513953	7.079181282	7.612783867	0	0	0	0	0	0	0	0	0	7.43136378	0	7.342422701	7.176091288	0	0	0	0	7.43136378	7.20412001	8.924279287	8.944482673
DBNL	0	0	0	0	0	0	0	0	0	0	0	0	0	0	0	0	6.806180042	6.913813905	6.770852085	0	0	0	0	0	0	0	0	7.079181282	0	0	0	0	0	6.740362768	7.146128067	0	0	0	0	0	0	0	0	0	0	8.176091262	7.414973365	7.672097867	7.662757841
HNRNPC	0	0	0	6.176091549	0	6.447158186	7.146128067	7.113943386	7.079181282	7.113943386	7.397940026	7.176091288	7.20412001	7.113943386	7.079181282	7.079181282	6.944482722	6.86332292	6.812913423	0	0	0	6.968482995	7.278753624	6.477121399	7.544068057	7.633468466	7.477121269	7.845098046	8.113943356	8.146128039	7.568201736	6.531479045	6.908485072	6.724275952	0	0	8.568201725	0	7.934498456	7.518513953	0	0	0	7.799340556	8.255272508	7.278753624	9.146128036	8.826074803
HNRNPDL	0	0	0	0	0	0	0	0	0	6.079181608	0	0	0	0	0	0	0	0	0	0	0	0	0	0	5.778151974	6.806180042	6.897627146	0	7.397940026	7.643452686	7.518513953	6.748188105	6.255272746	7.000000043	6.716003427	0	0	7.579783608	0	7.732393768	7.146128067	0	0	0	7.278753624	7.924279291	7.000000043	8.531478918	8.973127854
RPS3A	0	0	0	0	0	6.908485072	0	0	0	0	6.342422878	0	0	7.146128067	7.278753624	7.255272529	6.86332292	6.799340618	6.929418977	0	7.462398013	0	0	0	0	0	0	7.230448947	0	7.301030017	7.414973365	7.806179981	0	0	7.954242514	0	0	8.301029998	0	7.612783867	7.672097867	6.698970091	0	0	7.447158047	7.770852019	6.255272746	8.963787828	8.897627092
CSRP1	0	0	0	0	0	0	0	0	0	0	0	0	0	0	0	0	0	6.755874932	0	0	0	0	7.43136378	6.690196169	6.633468557	7.146128067	0	7.447158047	0	0	0	0	7.113943386	6.690196169	7.770852019	0	0	0	0	0	0	0	0	0	0	7.322219315	0	8.113943356	8.41497335
SRSF2	0	0	0	0	0	0	0	0	0	0	0	0	0	0	0	0	0	0	0	0	0	0	0	0	7.146128067	0	0	0	0	0	0	0	0	0	0	0	0	0	0	0	0	0	0	0	0	0	0	8.146128039	0
PSMD14	0	0	0	0	6.67209795	0	0	0	0	0	0	0	0	6.85125841	0	0	0	0	0	0	0	0	7.146128067	0	6.477121399	0	0	7.672097867	0	0	7.20412001	7.301030017	0	0	6.491361834	6.73239384	0	7.897627097	0	7.812913363	0	7.491361708	0	0	7.414973365	0	0	8.716003344	8.732393761
BANF1	7.342422701	6.785329906	7.278753624	7.755874863	8.000000004	8.000000004	7.995635199	7.863322866	7.792391697	7.875061269	7.845098046	7.653212523	7.724275878	6.146128346	7.591064618	7.892094608	7.886490731	7.763428001	7.653212523	0	7.278753624	7.447158047	6.812913423	6.643452775	6.397940182	8.204119985	7.819543942	8.301029998	8.447158033	8.50514998	8.568201725	7.397940026	7.255272529	0	7.662757841	0	0	8.204119985	0	8.633468457	8.41497335	0	8.113943356	0	8.380211244	9.204119983	7.875061269	9.556302501	9.041392686
SSB	0	0	0	0	0	0	0	0	0	0	0	0	0	6.85125841	6.724275952	6.919078145	0	0	0	0	0	0	0	0	0	0	0	0	0	0	0	0	0	0	0	0	0	6.95904144	0	0	0	0	0	0	6.740362768	0	0	8.72427587	9.041392686
CTSB	0	0	0	0	0	0	0	0	0	0	6.698970091	6.204120254	6.770852085	0	0	0	0	6.556302621	6.67209795	0	0	0	0	0	0	0	0	0	0	0	0	0	0	0	0	0	0	0	0	0	0	7.838849097	0	0	0	0	0	8.897627092	8.939519253
UQCRC2	0	0	0	0	0	0	0	0	0	0	6.755874932	6.812913423	6.414973515	0	0	0	6.892094658	6.886490782	7.079181282	0	0	0	0	0	0	0	0	0	0	0	0	6.113943686	6.963787875	0	6.447158186	0	0	0	0	0	0	0	0	0	0	0	0	0	0
RPL13	0	6.113943686	0	0	0	0	0	0	0	0	0	0	0	0	0	0	7.146128067	7.255272529	7.176091288	0	0	0	6.908485072	6.414973515	0	0	0	7.462398013	0	7.949390012	8.07918125	7.491361708	0	7.230448947	7.079181282	0	7.361727855	8.633468457	0	7.633468466	8.113943356	0	0	0	7.230448947	0	7.255272529	8.995635195	8.886490726
DEK	0	0	0	0	0	0	0	0	0	0	0	0	0	0	0	0	0	0	0	0	0	0	0	0	0	0	0	0	0	0	0	0	0	0	0	0	0	0	0	0	0	0	0	0	0	0	0	7.799340556	0
RPL5	0	0	0	0	0	0	0	6.176091549	0	0	0	0	0	6.99122612	7.20412001	7.146128067	6.301030213	5.643453664	7.079181282	0	0	0	0	0	0	0	7.278753624	0	8.041392689	7.342422701	6.968482995	0	0	0	7.505149992	0	0	8.041392689	0	8.204119985	7.707570185	7.568201736	7.113943386	0	7.897627097	8.146128039	7.505149992	9.041392686	9.278753601
CRIP1	0	0	0	0	0	0	0	0	0	0	0	0	0	0	0	0	0	0	0	0	0	0	0	0	0	0	0	0	0	0	0	0	7.778151258	0	0	0	0	0	0	0	0	0	0	0	0	0	0	0	0
RPL23A	0	0	0	0	0	0	0	0	0	0	0	0	0	0	0	0	7.000000043	7.041392725	6.819544001	0	0	0	0	0	6.99122612	0	0	0	7.361727855	0	0	7.342422701	0	7.146128067	7.397940026	0	0	7.763428001	0	0	0	0	0	0	0	0	7.544068057	8.255272508	7.880813598
RPS6	0	0	0	0	0	0	0	0	0	0	0	0	0	7.255272529	6.397940182	7.38021126	6.919078145	6.778151323	7.041392725	0	0	0	0	0	6.255272746	7.491361708	7.301030017	7.505149992	7.799340556	7.863322866	8.146128039	7.851258355	7.000000043	6.924279338	7.230448947	0	0	8.681241238	0	0	7.681241246	0	6.707570261	0	7.97772361	7.698970013	7.568201736	9.176091259	8.929418926
ACACA	0	0	0	0	0	0	0	0	0	0	0	0	0	0	6.662757926	0	0	0	0	0	0	0	0	0	0	0	0	0	0	0	0	0	0	0	0	0	0	0	0	0	0	0	0	0	0	0	0	7.919078098	8.322219297
PAK2	0	0	0	6.707570261	6.414973515	6.591064718	0	0	0	0	0	0	0	0	0	0	6.880813649	6.897627146	6.845098102	0	0	0	0	0	0	6.690196169	0	6.903090041	0	0	0	6.204120254	0	6.949390055	0	0	0	8.255272508	0	0	0	0	0	0	6.919078145	7.863322866	7.079181282	8.230448924	7.982271238
CBX3	0	0	0	0	0	0	0	0	0	0	0	0	0	0	0	0	0	0	0	0	0	0	0	0	0	0	0	0	0	0	0	0	0	7.301030017	0	0	0	8.146128039	0	0	0	0	0	0	0	0	0	8.322219297	8.431363766
SRSF7	0	0	0	0	0	0	0	0	0	0	0	0	0	0	0	0	0	0	0	0	0	0	0	0	0	0	0	0	0	0	0	0	0	0	0	0	0	8.113943356	0	0	0	0	0	0	0	0	0	8.301029998	0
LRRFIP1	0	0	0	0	0	0	0	0	0	0	0	0	0	0	0	0	0	0	0	0	0	0	0	0	0	0	0	0	0	0	0	0	0	0	0	0	0	0	0	0	0	0	0	0	0	0	6.880813649	0	7.079181282
ARHGEF2	0	0	0	0	0	0	0	0	0	0	0	0	0	0	0	0	0	0	0	0	0	0	0	0	0	0	0	0	0	0	0	0	0	0	0	0	0	0	0	0	0	0	0	0	0	7.53147893	6.934498502	7.342422701	0
PRMT5	0	0	0	0	0	0	0	0	0	0	0	0	0	0	0	0	0	0	0	0	0	0	0	0	0	7.113943386	0	0	0	0	0	7.113943386	0	5.944483166	7.477121269	0	0	0	0	0	0	0	0	0	6.462398148	8.113943356	0	8.255272508	8.662757833
CLTA	0	0	0	0	0	0	0	0	0	0	0	0	0	0	0	0	0	0	0	0	0	0	0	0	0	7.477121269	7.602060002	0	7.556302513	7.748188035	7.698970013	7.361727855	7.322219315	7.301030017	7.857332502	0	6.447158186	7.770852019	0	0	7.732393768	0	0	0	0	7.97772361	0	9.301029996	9.113943353
CLTB	0	0	0	0	0	0	0	0	0	0	0	0	0	0	0	0	0	0	0	0	0	0	0	0	0	0	0	0	0	0	0	0	7.397940026	0	0	0	0	0	0	0	0	0	0	0	0	7.838849097	0	8.39794001	8.07918125
SPTBN1	0	0	0	0	0	0	7.322219315	7.301030017	7.041392725	7.000000043	0	0	5.397941746	7.000000043	7.278753624	6.995635238	7.20412001	7.477121269	7.447158047	0	0	0	0	0	0	0	0	0	0	0	0	7.079181282	6.73239384	7.447158047	6.643452775	0	0	0	7.342422701	0	7.041392725	0	0	0	0	7.949390012	7.643452686	7.397940026	7.301030017
EHD2	0	0	7.505149992	0	0	0	7.041392725	7.176091288	7.113943386	0	6.6020601	6.477121399	0	0	0	0	6.431363925	0	0	7.43136378	7.43136378	7.414973365	0	7.322219315	0	7.716003352	8.07918125	8.39794001	7.740362697	7.361727855	7.880813598	7.707570185	8.380211244	7.724275878	7.397940026	7.778151258	7.477121269	0	7.361727855	8.653212515	8.662757833	8.041392689	7.146128067	0	7.785329842	8.602059992	8.322219297	8.698970005	8.39794001
ITGA2	7.361727855	7.672097867	7.462398013	7.556302513	7.462398013	7.556302513	8.230448924	8.204119985	8.204119985	8.07918125	8.07918125	7.806179981	7.944482677	0	0	0	0	0	0	6.785329906	6.67209795	6.633468557	0	0	0	0	0	0	0	0	0	7.612783867	8.462397999	7.973127858	8.380211244	8.146128039	0	0	0	8.863322861	8.278753603	7.230448947	0	0	8.531478918	9.204119983	8.176091262	8.230448924	0
CLINT1	0	0	0	0	0	0	0	0	0	0	0	0	0	0	0	0	0	0	0	0	0	0	0	0	0	0	0	0	0	0	0	8.041392689	0	0	0	0	0	0	0	0	0	0	0	0	0	7.322219315	0	8.447158033	7.880813598
NAP1L4	7.230448947	0	0	0	0	0	0	0	0	0	0	0	0	0	0	0	0	0	0	0	6.785329906	6.977723651	0	0	7.602060002	7.43136378	7.897627097	7.414973365	8.322219297	8.07918125	8.322219297	7.698970013	7.672097867	7.43136378	7.602060002	6.623249394	0	0	0	7.113943386	7.633468466	8.113943356	0	0	0	7.770852019	7.505149992	8.86923172	8.959041393
PAICS	6.342422878	0	6.301030213	6.491361834	0	0	7.447158047	7.301030017	7.38021126	7.20412001	7.079181282	6.462398148	0	7.278753624	6.99122612	7.230448947	7.322219315	7.322219315	7.278753624	6.662757926	6.491361834	6.322219502	6.505150114	6.342422878	6.04139308	7.949390012	7.913813858	7.863322866	7.146128067	7.643452686	7.778151258	8.07918125	7.041392725	7.301030017	7.653212523	7.397940026	7.113943386	8.07918125	0	8.301029998	7.770852019	8.041392689	6.819544001	0	7.851258355	9.041392686	8.113943356	8.41497335	8.113943356
CTNND1	7.518513953	7.544068057	7.643452686	0	0	0	8.146128039	8.146128039	8.000000004	7.672097867	7.278753624	7.113943386	7.43136378	7.146128067	7.863322866	7.875061269	6.897627146	7.041392725	6.6020601	0	0	0	0	0	0	7.556302513	7.653212523	7.591064618	0	0	7.176091288	8.832508913	8.50514998	7.819543942	8.612783858	7.799340556	7.113943386	7.755874863	0	7.653212523	8.176091262	0	7.146128067	7.397940026	8.518513941	9.86332286	7.929418931	8.531478918	8.041392689
DKC1	0	0	0	0	0	0	0	0	0	0	0	0	0	0	0	0	0	0	0	0	0	0	0	0	0	0	0	0	0	0	0	0	0	0	0	0	0	0	0	0	0	0	0	0	0	0	0	8.301029998	8.41497335
DNAJA2	0	0	0	7.113943386	7.079181282	0	0	0	0	6.799340618	0	0	0	0	0	7.000000043	0	0	7.414973365	7.579783608	6.832508977	7.414973365	0	0	0	6.322219502	0	0	0	7.505149992	0	7.278753624	7.579783608	6.27875383	7.491361708	0	7.342422701	0	0	6.929418977	8.146128039	0	0	0	6.880813649	8.518513941	8.204119985	8.176091262	8.278753603
RRAS	7.491361708	7.579783608	7.602060002	0	0	0	7.447158047	7.477121269	7.819543942	7.079181282	7.176091288	7.079181282	7.041392725	0	0	0	7.518513953	7.176091288	7.568201736	0	0	0	0	0	0	0	0	0	0	0	0	7.000000043	7.518513953	7.612783867	6.531479045	0	7.278753624	7.342422701	0	8.07918125	8.113943356	0	0	0	7.973127858	8.633468457	7.770852019	7.732393768	0
ADH5	0	7.579783608	7.322219315	0	0	0	6.380211423	6.690196169	6.6020601	6.579783711	6.924279338	6.633468557	6.799340618	0	0	0	6.397940182	6.623249394	6.643452775	7.716003352	7.505149992	7.447158047	7.755874863	0	0	8.707570177	8.633468457	8.707570177	7.770852019	7.908485024	7.934498456	6.591064718	0	7.342422701	7.20412001	7.079181282	7.724275878	8.204119985	8.361727838	8.255272508	8.146128039	9.079181246	0	0	7.477121269	8.602059992	7.763428001	9.079181246	9.361727836
CAPN2	0	0	0	6.579783711	6.591064718	6.531479045	7.079181282	7.000000043	7.041392725	6.623249394	6.568201841	0	0	0	0	0	0	0	6.698970091	0	0	0	0	0	0	0	0	7.079181282	0	6.944482722	7.000000043	7.447158047	6.690196169	6.643452775	6.491361834	6.838849154	0	0	0	8.230448924	7.556302513	7.568201736	6.908485072	0	7.892094608	8.491361695	7.113943386	7.447158047	8.041392689
COPB2	0	0	0	6.85125841	6.623249394	6.755874932	6.85125841	0	0	0	0	0	0	0	0	0	0	0	0	0	0	0	0	0	0	7.38021126	7.361727855	0	0	0	0	7.322219315	0	6.755874932	6.322219502	0	0	7.812913363	0	7.653212523	0	0	0	0	0	7.20412001	6.662757926	8.612783858	8.986771735
GFPT1	6.505150114	6.146128346	6.944482722	7.113943386	6.579783711	0	6.724275952	7.230448947	7.146128067	6.113943686	6.518514071	7.041392725	6.799340618	7.505149992	8.113943356	8.041392689	6.755874932	7.176091288	7.361727855	8.716003344	8.672097859	8.681241238	7.462398013	7.322219315	7.255272529	8.041392689	8.041392689	8.113943356	0	7.176091288	6.806180042	8.278753603	0	6.886490782	6.875061321	0	7.944482677	8.230448924	8.204119985	8.204119985	7.653212523	8.591064608	7.556302513	0	7.832508919	8.544068046	7.785329842	8.278753603	8.431363766
TARDBP	0	0	0	0	0	0	0	0	0	0	0	0	0	0	0	0	0	0	0	0	0	0	0	0	0	0	0	0	0	0	0	0	0	0	0	0	0	7.662757841	0	0	0	0	0	0	0	0	0	8.41497335	8.806179975
AIMP2	0	0	0	0	0	0	0	0	0	0	0	0	0	0	7.944482677	0	6.65321261	6.73239384	6.724275952	6.397940182	0	0	0	0	0	0	0	0	7.113943386	0	0	7.20412001	0	6.380211423	6.568201841	6.462398148	7.342422701	8.39794001	7.806179981	7.792391697	0	8.041392689	7.278753624	0	6.785329906	8.041392689	7.079181282	8.41497335	8.176091262
PDLIM7	0	0	0	0	0	0	0	0	0	0	0	0	0	0	0	0	6.67209795	0	6.568201841	0	0	0	0	0	0	0	0	0	0	0	0	0	0	6.643452775	6.414973515	0	0	0	0	0	0	0	0	0	0	8.176091262	0	0	8.278753603
GRHPR	0	0	0	0	0	0	0	0	0	0	0	0	0	0	0	0	6.755874932	6.748188105	0	7.361727855	7.361727855	0	0	0	0	8.07918125	8.255272508	8.322219297	0	0	0	7.38021126	0	0	0	7.255272529	0	7.602060002	0	0	0	0	0	0	0	0	0	8.568201725	8.278753603
DPYSL2	0	0	0	0	0	0	0	6.414973515	6.342422878	0	6.556302621	6.301030213	6.27875383	6.397940182	6.531479045	6.491361834	6.477121399	6.9731279	6.477121399	0	7.041392725	6.690196169	7.278753624	7.255272529	6.763428068	8.176091262	7.897627097	8.041392689	7.53147893	7.806179981	7.838849097	6.748188105	0	0	0	0	7.113943386	0	8.146128039	7.838849097	7.740362697	8.255272508	6.623249394	0	7.041392725	8.113943356	7.662757841	8.79239169	9.414973348
PRMT1	0	0	0	0	0	0	0	0	0	0	0	0	0	7.113943386	7.146128067	0	6.724275952	0	6.04139308	0	0	0	0	0	0	6.806180042	6.690196169	7.176091288	0	0	0	0	6.892094658	6.716003427	6.491361834	0	0	7.53147893	0	0	7.255272529	0	0	0	6.968482995	8.146128039	6.690196169	8.832508913	9.079181246
IPO5	0	0	0	0	6.414973515	6.531479045	0	0	0	0	0	0	0	6.531479045	0	0	6.361728025	6.544068168	6.623249394	0	0	0	0	0	0	7.301030017	7.146128067	7.113943386	0	6.929418977	0	6.892094658	6.832508977	6.361728025	7.146128067	0	0	7.643452686	7.633468466	7.612783867	7.462398013	7.447158047	0	0	6.79239176	8.113943356	7.301030017	7.43136378	8.278753603
COPE	0	0	0	0	0	0	0	0	0	0	0	0	0	0	0	0	0	0	0	0	0	0	0	0	0	0	0	0	0	0	0	6.544068168	0	5.954242992	0	0	0	7.812913363	0	0	0	0	0	0	0	0	0	8.204119985	8.230448924
USO1	0	0	0	0	0	0	0	0	0	0	6.544068168	0	0	0	6.491361834	0	0	0	0	0	6.707570261	0	0	0	0	7.477121269	7.653212523	7.672097867	6.913813905	7.079181282	0	0	0	6.322219502	0	5.991226519	6.662757926	0	0	0	0	8.07918125	0	0	6.939519303	7.491361708	0	8.176091262	8.690196081
PMPCB	0	0	0	0	0	0	0	0	0	0	0	0	0	0	0	0	0	0	0	0	0	0	0	0	0	0	0	0	0	0	0	0	0	0	0	0	0	0	0	0	0	0	0	0	0	0	0	0	8.556302502
SF3B1	0	0	0	0	0	0	6.591064718	0	6.623249394	0	6.447158186	6.27875383	6.579783711	6.556302621	6.944482722	0	0	0	0	0	0	0	0	0	0	0	0	0	0	0	0	0	0	0	0	0	0	8.07918125	0	0	0	0	0	0	6.806180042	0	0	8.690196081	8.74036269
NQO1	0	0	0	0	0	0	8.204119985	8.176091262	8.146128039	6.146128346	6.707570261	8.146128039	8.113943356	8.568201725	8.518513941	8.556302502	8.041392689	8.301029998	7.944482677	0	0	0	0	0	0	0	0	0	0	0	0	8.556302502	8.41497335	7.079181282	0	7.740362697	0	8.672097859	8.041392689	0	0	0	8.176091262	7.000000043	9.079181246	9.301029996	8.041392689	8.886490726	8.278753603
ALDH1B1	0	0	0	0	0	0	0	0	6.690196169	0	0	0	6.748188105	0	0	0	6.690196169	6.838849154	6.86332292	0	0	0	0	0	0	0	0	0	0	0	0	8.322219297	0	0	0	0	0	0	0	0	0	0	7.556302513	0	0	0	0	8.39794001	8.623249291
RPS9	0	0	0	0	0	0	6.380211423	6.518514071	0	6.477121399	6.342422878	0	0	0	0	0	6.763428068	6.806180042	6.778151323	0	0	6.633468557	0	0	0	0	0	0	0	0	0	7.579783608	0	7.397940026	7.623249301	0	0	8.301029998	0	0	0	7.53147893	0	0	7.681241246	8.278753603	7.505149992	9.176091259	9.113943353
ALDH1A3	0	0	0	0	0	0	7.176091288	7.643452686	6.986771779	7.255272529	6.770852085	7.041392725	7.079181282	0	0	0	0	0	0	0	0	0	0	0	0	0	0	0	0	0	0	8.322219297	0	0	7.591064618	0	0	0	0	0	0	0	7.556302513	0	8.113943356	8.477121256	0	8.204119985	8.322219297
PMPCA	0	0	0	0	0	0	0	0	0	0	0	0	0	0	0	0	6.85125841	0	0	0	0	0	0	0	0	0	0	0	0	0	0	0	0	0	0	0	0	0	0	0	0	0	0	0	6.447158186	0	0	7.38021126	8.50514998
SF3B3	0	0	0	0	0	0	0	0	0	0	0	0	0	0	0	0	0	0	0	0	0	0	0	0	0	0	0	0	0	0	0	0	0	0	5.944483166	0	0	8.041392689	0	0	0	0	0	0	6.322219502	0	0	8.707570177	8.653212515
FAM98B	0	0	0	0	0	0	0	0	0	0	0	0	0	0	0	0	0	0	0	0	0	0	0	0	0	0	0	0	0	0	0	0	0	0	0	0	0	0	0	0	0	0	0	0	0	0	0	7.886490731	7.939519258
SND1	0	0	0	6.812913423	6.79239176	6.724275952	0	0	6.982271278	6.662757926	0	0	6.491361834	7.38021126	0	7.38021126	6.913813905	6.79239176	6.857332557	0	0	0	0	0	0	7.361727855	6.690196169	0	0	7.278753624	6.431363925	7.278753624	6.146128346	6.892094658	6.544068168	0	6.531479045	8.50514998	7.643452686	7.633468466	0	7.716003352	0	0	0	7.000000043	7.342422701	8.230448924	8.851258349
BZW1	0	0	0	0	0	0	6.491361834	6.662757926	6.518514071	5.913814382	6.681241328	6.322219502	6.361728025	0	0	0	0	6.763428068	6.748188105	0	0	0	0	0	0	7.792391697	7.672097867	7.43136378	0	7.414973365	7.322219315	7.568201736	7.000000043	7.146128067	7.20412001	7.146128067	6.99122612	0	7.38021126	0	7.322219315	7.963787832	0	0	7.505149992	8.176091262	7.255272529	8.380211244	8.623249291
EML4	0	0	0	0	0	0	0	0	0	0	0	0	0	0	0	0	0	0	0	7.113943386	0	0	0	0	0	0	0	6.716003427	6.982271278	6.623249394	0	0	0	7.176091288	0	0	0	0	0	0	0	0	0	0	0	0	0	8.255272508	8.431363766
FARSB	0	0	0	0	0	0	0	0	0	0	0	0	0	6.462398148	0	0	6.643452775	6.6020601	6.568201841	0	0	0	0	0	0	6.000000434	0	7.000000043	0	0	6.934498502	0	0	0	0	0	0	7.908485024	0	0	0	0	0	0	6.939519303	7.653212523	0	8.176091262	8.623249291
RUVBL1	0	0	6.875061321	0	0	0	6.662757926	6.819544001	6.65321261	6.740362768	0	6.397940182	6.579783711	0	0	0	6.845098102	6.707570261	6.681241328	6.230449177	0	5.995635633	0	0	0	7.278753624	7.146128067	7.146128067	6.477121399	7.041392725	6.954242558	7.079181282	7.113943386	7.20412001	7.20412001	0	0	8.301029998	0	7.875061269	7.000000043	7.477121269	0	0	7.079181282	8.447158033	7.230448947	8.770852012	8.672097859
EIF5B	0	0	0	0	0	0	6.65321261	0	6.556302621	0	5.568202898	0	5.897627641	7.278753624	6.924279338	6.95904144	6.681241328	6.903090041	6.812913423	0	0	0	0	0	0	0	0	0	0	0	0	6.67209795	0	5.724276689	0	0	6.623249394	7.653212523	7.505149992	7.544068057	0	6.740362768	0	0	0	0	0	7.740362697	7.968482953
BCAM	0	0	0	0	0	0	0	0	0	0	0	0	0	0	0	0	0	0	0	0	0	0	0	0	0	6.230449177	0	0	0	0	0	0	7.113943386	0	6.875061321	0	0	6.146128346	0	0	0	6.146128346	0	0	0	0	0	0	0
CHMP4B	6.806180042	7.079181282	7.079181282	0	0	0	0	6.612783963	6.662757926	6.6020601	0	0	0	0	0	0	0	0	0	0	0	0	0	0	0	7.973127858	7.934498456	7.880813598	6.99122612	0	0	8.41497335	8.113943356	7.568201736	8.612783858	7.414973365	0	0	0	7.785329842	7.602060002	0	0	0	0	7.986771739	8.39794001	7.939519258	0
TMED7	0	0	0	0	0	0	8.322219297	8.301029998	8.255272508	8.146128039	8.204119985	8.113943356	7.826074809	0	0	0	6.86332292	6.968482995	6.968482995	0	0	0	0	0	0	0	0	0	0	0	0	0	7.301030017	6.505150114	7.041392725	7.041392725	0	0	0	0	0	0	0	0	8.041392689	0	0	7.556302513	0
DDX46	0	0	0	0	0	0	0	0	0	0	0	0	0	0	0	0	0	0	0	0	0	0	0	0	0	0	0	0	0	0	0	0	0	0	0	0	0	0	0	0	0	0	0	0	0	0	0	8.07918125	7.740362697
SNX3	0	0	0	0	0	0	0	0	0	0	0	0	0	0	0	0	0	6.301030213	0	0	0	0	0	0	0	0	0	0	0	0	0	0	0	0	7.113943386	0	0	0	0	7.43136378	0	7.278753624	0	0	0	0	7.176091288	0	8.041392689
ATP1B3	7.973127858	8.301029998	8.000000004	0	0	0	7.041392725	7.255272529	7.20412001	6.612783963	7.113943386	7.041392725	7.041392725	0	0	0	6.612783963	7.462398013	6.982271278	0	0	6.919078145	0	0	0	7.919078098	8.041392689	8.07918125	7.397940026	7.973127858	8.176091262	7.38021126	8.301029998	7.491361708	7.579783608	7.176091288	0	0	0	7.97772361	0	0	0	0	7.857332502	8.707570177	9	8.176091262	0
MARCKS	6.897627146	6.9731279	6.86332292	0	0	0	6.462398148	6.255272746	6.643452775	6.748188105	6.477121399	0	6.301030213	0	0	0	0	0	0	7.832508919	7.698970013	7.672097867	8.041392689	7.892094608	7.838849097	9.041392686	9.041392686	8.934498452	8.845098041	8.653212515	8.602059992	8.875061264	8.556302502	9.041392686	8.623249291	8.113943356	6.903090041	0	0	8.518513941	7.845098046	7.176091288	6.361728025	0	7.672097867	8.991226076	7.934498456	8.39794001	7.556302513
DLST	0	0	0	0	0	0	6.875061321	6.880813649	6.897627146	6.73239384	7.041392725	6.79239176	6.869231778	0	0	0	6.939519303	6.806180042	6.880813649	0	0	0	0	0	0	0	0	0	0	0	0	0	7.38021126	7.477121269	7.146128067	6.9731279	0	0	0	0	0	0	0	0	7.041392725	0	0	8.531478918	0
DNM1L	0	0	0	0	0	0	0	0	0	0	0	0	0	6.361728025	6.995635238	6.146128346	0	0	0	6.716003427	0	0	0	0	0	7.361727855	7.38021126	7.397940026	7.079181282	7.278753624	7.041392725	0	0	6.000000434	5.79239239	6.643452775	7.176091288	7.623249301	0	7.845098046	7.113943386	8.041392689	0	0	7.041392725	6.982271278	6.67209795	8.07918125	8.518513941
FKBP1A	0	6.986771779	7.000000043	0	0	0	6.447158186	6.544068168	6.544068168	6.544068168	0	0	0	0	0	0	0	0	0	0	0	0	0	0	0	0	0	0	0	0	0	7.732393768	7.903089992	7.826074809	0	0	0	0	0	0	7.939519258	0	0	0	0	8.579783598	7.748188035	7.869231726	0
VAMP3	0	0	0	0	0	0	0	7.414973365	7.491361708	0	0	0	0	0	0	0	6.838849154	0	0	0	0	0	0	0	0	0	0	0	0	7.322219315	0	0	7.819543942	0	7.000000043	0	0	0	0	0	0	0	7.690196089	0	8.204119985	8.255272508	8.113943356	8.707570177	0
STAT3	0	0	0	0	0	0	6.414973515	0	0	0	0	0	0	0	0	0	0	0	0	0	0	0	0	0	0	6.903090041	6.716003427	0	0	0	0	5.973128316	0	0	6.531479045	0	0	0	0	0	0	0	0	0	0	0	0	8.146128039	8.612783858
VTA1	0	0	0	0	0	0	0	0	0	6.414973515	0	0	0	6.380211423	6.785329906	6.643452775	0	0	0	6.176091549	0	0	0	0	0	0	0	0	0	0	0	7.602060002	7.556302513	0	7.612783867	7.38021126	7.278753624	7.255272529	0	7.079181282	7.505149992	0	0	0	0	7.963787832	8.146128039	8.000000004	8.07918125
CSTB	0	6.724275952	0	0	0	0	7.041392725	7.113943386	7.176091288	7.000000043	7.000000043	6.79239176	6.913813905	0	0	0	0	0	6.568201841	0	0	0	0	0	0	0	0	0	0	0	0	7.826074809	7.806179981	7.732393768	7.462398013	7.491361708	0	0	0	7.934498456	0	0	0	0	7.913813858	8.50514998	8.301029998	9	0
NPC2	0	0	0	0	0	0	0	0	0	0	0	0	0	0	0	0	0	0	0	0	0	0	0	0	0	0	0	0	0	0	0	0	7.913813858	7.447158047	7.301030017	0	0	0	0	0	0	0	0	0	0	0	7.20412001	0	0
STXBP3	6.414973515	6.342422878	6.748188105	0	0	0	6.770852085	6.707570261	6.65321261	6.65321261	0	0	0	0	0	0	6.799340618	6.99122612	6.963787875	0	0	0	0	0	0	0	6.690196169	0	6.785329906	0	0	7.176091288	7.591064618	6.447158186	7.20412001	6.518514071	0	7.662757841	0	7.612783867	0	0	0	0	7.414973365	9.204119983	7.518513953	0	0
UBE2N	7.041392725	7.041392725	7.113943386	0	0	0	7.000000043	6.812913423	6.9731279	0	0	0	0	0	0	0	6.505150114	6.826074868	6.6020601	7.38021126	0	0	0	0	0	7.963787832	7.863322866	7.785329842	7.20412001	7.342422701	7.342422701	7.602060002	7.643452686	7.544068057	8.041392689	0	7.146128067	7.491361708	0	7.778151258	7.838849097	7.812913363	0	0	7.176091288	8.863322861	7.97772361	8.041392689	0
SUMO2	0	0	0	0	0	0	0	0	0	0	0	0	0	0	0	0	0	0	0	0	0	0	0	0	0	7.799340556	0	7.748188035	0	0	0	0	0	7.079181282	8.07918125	0	0	0	0	0	7.146128067	0	0	0	0	8.653212515	7.146128067	0	0
DIAPH1	0	0	0	0	0	0	0	0	0	0	0	0	0	6.361728025	7.38021126	0	0	0	0	0	0	0	0	0	0	7.079181282	7.612783867	7.477121269	0	0	0	7.041392725	6.903090041	6.903090041	6.633468557	0	0	6.662757926	7.690196089	6.968482995	6.913813905	7.826074809	0	0	6.892094658	8.322219297	6.740362768	7.43136378	7.785329842
AKR1C1	0	0	0	0	0	0	7.255272529	7.176091288	7.255272529	6.431363925	0	6.633468557	0	0	0	0	0	0	0	0	0	9.819543936	0	0	0	0	8.982271233	8.949390007	0	0	0	9.079181246	8.531478918	0	0	8.41497335	7.518513953	0	0	0	0	8.342422683	7.690196089	0	7.886490731	7.477121269	0	8.579783598	0
ATP2B4	0	0	7.278753624	0	0	0	6.908485072	6.857332557	6.748188105	6.886490782	6.845098102	0	0	0	0	0	6.690196169	0	6.832508977	7.20412001	0	7.278753624	7.000000043	0	0	7.763428001	7.568201736	7.322219315	7.447158047	0	7.462398013	7.880813598	8.07918125	8.176091262	7.462398013	7.806179981	6.86332292	0	0	7.681241246	7.778151258	0	6.431363925	0	8.041392689	9.041392686	7.986771739	8.000000004	0
ATP2A2	0	0	0	0	0	0	6.99122612	7.079181282	7.000000043	6.73239384	7.851258355	7.819543942	7.505149992	0	0	0	6.579783711	6.886490782	6.897627146	0	0	0	0	0	0	0	0	0	0	0	0	7.301030017	7.763428001	0	7.477121269	0	0	0	0	0	0	0	0	0	7.397940026	0	6.176091549	0	0
ABCE1	0	0	0	0	0	0	6.462398148	0	0	0	0	0	0	6.623249394	6.6020601	6.643452775	6.924279338	6.838849154	6.65321261	0	0	0	0	0	0	6.79239176	0	0	6.982271278	0	0	7.505149992	6.977723651	0	6.880813649	0	0	0	0	0	0	0	0	0	0	8.204119985	7.146128067	8.41497335	8.633468457
DDX39B	0	0	0	6.397940182	6.361728025	6.342422878	0	0	0	0	0	6.633468557	6.322219502	6.724275952	6.380211423	6.716003427	0	6.556302621	6.591064718	6.954242558	6.826074868	6.623249394	0	7.079181282	6.857332557	0	6.977723651	0	6.255272746	7.230448947	7.20412001	6.86332292	6.361728025	6.204120254	6.505150114	6.505150114	0	8.39794001	7.633468466	7.845098046	7.477121269	8.176091262	7.301030017	0	7.544068057	8.113943356	7.176091288	9.041392686	9.041392686
HNRNPL	0	0	7.041392725	0	0	0	7.278753624	0	5.633469466	6.380211423	0	0	0	8.361727838	8.176091262	0	0	0	0	0	0	0	0	0	0	7.361727855	0	0	0	7.740362697	7.653212523	7.447158047	0	0	0	7.079181282	6.518514071	8.113943356	0	7.20412001	0	6.85125841	6.633468557	0	7.230448947	7.322219315	0	8.897627092	8.892094603
ASNS	0	0	0	0	0	0	0	0	0	0	0	0	0	7.079181282	7.301030017	7.079181282	0	0	6.633468557	6.04139308	0	6.079181608	6.04139308	0	0	0	6.892094658	6.913813905	0	0	0	7.880813598	0	6.982271278	5.518515256	0	0	0	7.886490731	7.518513953	7.491361708	7.491361708	0	0	0	7.748188035	7.690196089	8.041392689	0
UBE2L3	0	0	0	0	0	0	0	0	0	0	0	0	0	0	0	0	0	0	0	0	0	0	0	0	0	0	0	0	0	0	0	7.653212523	0	7.681241246	6.6020601	0	0	0	0	0	0	0	0	0	0	0	7.903089992	0	0
NCKAP1	6.000000434	6.322219502	5.995635633	0	0	0	7.278753624	7.414973365	7.146128067	6.886490782	0	0	0	0	7.755874863	0	6.897627146	7.491361708	7.20412001	6.838849154	0	0	0	0	0	7.176091288	7.20412001	7.322219315	0	0	7.079181282	7.633468466	7.778151258	7.491361708	7.447158047	6.924279338	0	7.113943386	0	0	7.447158047	0	0	0	7.505149992	8.623249291	7.748188035	8.255272508	8.322219297
CD2AP	0	0	0	0	0	0	6.707570261	7.230448947	6.462398148	6.04139308	6.397940182	0	6.591064718	6.397940182	0	6.740362768	6.361728025	0	6.462398148	0	0	0	0	0	0	7.982271238	7.908485024	7.924279291	0	0	0	7.707570185	0	0	8.041392689	0	0	7.869231726	0	0	7.146128067	0	0	0	0	7.886490731	8.176091262	0	0
RTN4	0	0	0	0	0	0	7.113943386	6.579783711	7.361727855	6.944482722	7.20412001	7.43136378	7.113943386	0	0	0	0	0	0	0	0	0	0	0	0	0	0	0	0	0	0	0	7.041392725	0	0	0	0	0	7.556302513	7.447158047	0	0	0	0	6.73239384	0	0	8.322219297	0
PFDN6	0	0	0	0	0	0	0	0	0	0	0	0	0	0	0	0	0	0	0	0	0	0	0	0	0	0	0	0	0	0	0	0	0	7.000000043	6.397940182	0	0	0	0	0	0	0	0	0	0	8.113943356	7.322219315	7.838849097	0
AKR7A2	0	0	0	0	0	0	0	0	0	0	0	0	0	0	0	0	0	0	0	0	7.505149992	0	0	0	0	7.939519258	7.886490731	7.770852019	0	0	0	6.204120254	0	0	0	0	0	0	0	0	0	0	0	0	0	7.929418931	7.113943386	8.79239169	8.380211244
PDIA6	0	0	0	0	0	0	8.491361695	8.531478918	8.50514998	8.462397999	8.431363766	8.230448924	8.278753603	0	6.431363925	0	7.556302513	7.579783608	7.544068057	6.204120254	0	5.913814382	6.113943686	0	0	6.431363925	7.20412001	7.544068057	0	0	7.079181282	7.863322866	7.785329842	6.875061321	6.518514071	7.462398013	6.643452775	7.505149992	7.447158047	7.301030017	7.568201736	0	0	0	7.505149992	7.602060002	7.462398013	7.908485024	8.301029998
CORO1B	7.414973365	7.579783608	7.591064618	0	0	0	0	0	0	0	0	6.698970091	0	0	0	0	0	0	0	7.146128067	7.146128067	7.079181282	7.462398013	6.954242558	6.763428068	7.806179981	0	8.342422683	7.892094608	0	7.643452686	7.113943386	7.146128067	7.544068057	7.623249301	7.230448947	6.85125841	7.698970013	0	0	0	8.255272508	0	0	6.73239384	7.959041397	7.732393768	8.949390007	9.255272505
TMOD3	0	0	0	0	0	0	0	0	0	0	0	0	0	7.982271238	8.000000004	0	0	0	0	0	0	0	0	0	0	0	0	0	0	0	0	0	0	0	0	0	0	0	0	0	0	0	0	0	0	8.380211244	7.462398013	0	7.832508919
PSME2	0	0	7.041392725	0	0	0	7.322219315	7.20412001	7.255272529	6.897627146	6.799340618	6.65321261	0	0	6.770852085	6.690196169	6.95904144	0	0	0	0	0	0	0	0	0	0	0	0	0	0	7.361727855	6.6020601	7.000000043	7.255272529	6.255272746	0	0	0	7.732393768	0	0	0	0	7.041392725	8.431363766	7.322219315	8.342422683	8.204119985
UBA6	0	0	0	0	0	0	0	0	0	0	0	0	0	0	0	0	0	0	6.6020601	0	0	0	0	0	0	7.20412001	7.176091288	7.301030017	0	0	0	0	0	0	6.361728025	0	0	7.845098046	7.041392725	0	0	8.113943356	0	0	0	7.724275878	7.079181282	8.255272508	8.176091262
GPS1	0	0	0	0	0	0	0	6.146128346	0	0	0	0	0	0	7.278753624	0	6.204120254	0	0	6.342422878	6.255272746	0	0	6.04139308	0	7.278753624	7.414973365	0	5.633469466	0	0	0	0	0	6.255272746	6.322219502	0	0	0	0	0	7.518513953	0	0	0	7.342422701	0	7.322219315	8.301029998
BZW2	0	0	0	0	0	0	6.491361834	6.662757926	6.518514071	5.913814382	6.681241328	6.322219502	6.361728025	0	0	0	6.491361834	6.763428068	6.826074868	0	0	0	0	0	0	0	7.672097867	7.53147893	0	7.414973365	7.322219315	7.230448947	7.000000043	6.770852085	0	7.146128067	6.99122612	0	7.38021126	0	7.322219315	7.838849097	0	0	7.681241246	8.380211244	7.255272529	8.146128039	8.518513941
DCTN1	0	0	0	0	0	0	0	0	0	0	0	0	0	0	0	0	0	0	0	0	0	0	0	0	0	0	6.491361834	0	6.623249394	0	0	6.447158186	0	6.176091549	6.27875383	0	0	7.397940026	0	7.414973365	0	6.763428068	0	0	0	7.278753624	6.633468557	8.204119985	8.41497335
EEF1D	0	0	0	0	0	0	0	6.579783711	0	0	0	6.380211423	0	0	0	7.255272529	6.579783711	7.000000043	6.146128346	7.20412001	7.612783867	7.146128067	7.477121269	0	7.361727855	7.477121269	7.812913363	7.707570185	7.462398013	7.041392725	7.322219315	7.939519258	7.322219315	7.079181282	7.939519258	0	0	7.041392725	0	7.653212523	0	7.579783608	0	0	0	8.79239169	7.799340556	8.86923172	9.301029996
SEC23A	0	0	0	0	0	0	0	0	0	0	0	0	0	0	0	0	0	0	0	6.113943686	6.838849154	7.079181282	0	0	0	7.851258355	7.591064618	7.568201736	6.544068168	0	0	6.447158186	0	0	7.20412001	0	0	0	7.602060002	7.447158047	6.857332557	8.113943356	0	0	0	0	0	8.361727838	7.113943386
TSG101	6.832508977	6.568201841	7.113943386	6.806180042	6.819544001	7.079181282	7.079181282	7.230448947	7.041392725	6.903090041	7.176091288	7.255272529	7.113943386	6.903090041	7.000000043	6.845098102	7.041392725	6.838849154	6.690196169	6.579783711	6.518514071	0	6.414973515	0	0	7.342422701	7.397940026	7.662757841	7.397940026	7.544068057	7.653212523	7.939519258	8.041392689	7.342422701	8.477121256	7.361727855	8.113943356	8.322219297	0	8.113943356	8.322219297	7.707570185	7.913813858	0	7.643452686	8.755874856	8.591064608	7.934498456	0
ATL3	0	0	0	0	0	0	6.556302621	0	6.204120254	0	7.556302513	7.518513953	7.278753624	0	0	0	0	0	0	0	0	0	0	0	0	0	0	0	0	0	0	7.20412001	7.20412001	0	0	0	0	7.176091288	0	7.113943386	0	0	0	0	7.602060002	0	0	8.041392689	7.491361708
METAP2	0	0	0	0	0	0	0	0	0	0	0	0	0	0	0	0	0	0	0	0	0	0	0	0	0	0	0	0	0	0	0	0	0	0	0	0	0	0	0	0	0	0	0	0	0	0	0	0	7.963787832
SMARCC2	0	0	0	0	0	0	0	0	0	0	0	0	0	0	6.662757926	0	0	0	0	0	0	0	0	0	0	0	0	0	0	0	0	0	0	0	0	0	0	7.447158047	0	0	0	0	0	0	0	0	0	7.230448947	0
APEX1	0	0	0	0	0	0	0	0	0	0	0	0	0	0	0	0	0	0	0	0	0	0	0	0	0	0	0	0	0	0	0	0	0	0	0	0	0	0	0	0	0	0	0	0	0	0	0	8.301029998	9.146128036
NOP56	0	0	0	0	0	0	0	0	0	0	0	0	0	0	0	0	0	0	0	0	0	0	0	0	0	0	0	0	0	0	0	0	0	0	0	0	0	7.698970013	0	0	0	0	0	0	0	0	0	8.255272508	8.447158033
SEC31A	0	0	0	0	0	0	0	0	0	0	0	0	0	0	0	0	0	0	0	0	0	0	0	0	0	6.944482722	6.633468557	6.826074868	6.748188105	0	6.204120254	0	0	7.113943386	7.278753624	0	0	0	0	7.20412001	0	7.954242514	0	0	0	7.342422701	0	8.477121256	8.278753603
CCAR2	0	0	0	0	0	0	0	0	0	0	0	0	0	0	0	0	0	0	0	0	0	0	0	0	0	0	0	0	0	0	0	0	0	0	0	0	0	0	0	0	0	0	0	0	0	0	0	8.041392689	8.07918125
DDX39A	0	0	0	0	0	0	0	0	0	0	0	0	0	0	0	0	0	0	0	0	0	0	0	0	0	0	0	0	0	0	7.041392725	0	0	0	0	0	0	7.53147893	0	0	0	0	0	0	0	0	0	8.518513941	7.99122608
UBA2	0	0	0	0	0	0	6.568201841	0	0	5.968483416	0	0	0	7.20412001	0	7.255272529	0	0	0	0	0	0	0	0	0	0	0	0	0	0	0	0	0	0	0	0	0	0	0	0	0	0	0	0	0	0	0	8.07918125	8.230448924
ACOT7	0	0	0	0	0	0	0	0	0	0	0	0	0	0	0	0	0	6.799340618	6.65321261	0	0	0	0	0	0	0	0	0	6.531479045	0	0	0	0	0	0	0	0	0	0	0	0	0	0	0	0	8.322219297	7.342422701	8.39794001	8.230448924
PSMD11	0	0	0	0	0	0	0	0	0	0	6.812913423	6.623249394	0	6.724275952	6.875061321	6.892094658	6.518514071	6.322219502	6.431363925	6.770852085	6.531479045	6.462398148	6.491361834	6.845098102	0	7.845098046	7.477121269	7.643452686	7.681241246	7.53147893	7.397940026	7.230448947	0	7.230448947	7.278753624	6.95904144	7.113943386	8.322219297	7.869231726	8.113943356	7.681241246	8.380211244	7.278753624	0	7.361727855	7.973127858	7.20412001	8.748188028	8.763427994
EIF3F	0	0	0	6.826074868	6.690196169	0	0	0	0	6.361728025	0	0	0	7.041392725	7.000000043	6.986771779	6.255272746	6.954242558	0	0	0	0	0	0	0	7.414973365	7.477121269	7.342422701	7.491361708	7.255272529	7.322219315	7.568201736	6.176091549	7.591064618	7.568201736	6.633468557	0	8.176091262	0	8.342422683	7.612783867	7.799340556	0	0	7.113943386	7.43136378	7.342422701	8.826074803	8.995635195
EIF3D	0	0	0	0	0	0	0	0	0	0	0	0	0	0	6.724275952	0	6.491361834	0	0	0	0	6.342422878	7.43136378	0	0	0	0	0	8.146128039	8.146128039	8.07918125	0	0	0	0	0	0	8.07918125	0	0	0	0	0	0	6.447158186	0	0	8.79934055	8.892094603
DHX15	0	0	0	0	0	0	6.568201841	6.342422878	6.623249394	6.6020601	6.568201841	5.724276689	0	7.518513953	0	7.397940026	0	0	0	0	0	0	0	0	0	7.544068057	7.43136378	7.361727855	7.518513953	0	6.977723651	6.591064718	0	0	5.653213479	0	0	8.755874856	0	0	0	7.38021126	0	0	6.518514071	7.698970013	0	8.755874856	8.845098041
PSMD3	0	0	0	0	0	0	7.146128067	7.041392725	0	0	0	7.230448947	6.681241328	0	7.278753624	7.322219315	0	7.113943386	6.73239384	0	0	0	7.041392725	0	0	7.38021126	7.041392725	0	0	0	7.176091288	0	0	7.255272529	7.176091288	0	7.690196089	8.000000004	7.698970013	7.763428001	7.623249301	7.949390012	6.65321261	0	7.146128067	7.763428001	6.908485072	8.74036269	8.851258349
HNRNPR	0	0	0	0	0	0	0	0	0	0	0	0	0	0	0	0	6.431363925	6.04139308	6.27875383	0	0	0	0	0	0	0	0	0	7.505149992	7.653212523	7.681241246	7.230448947	0	0	6.826074868	0	0	7.908485024	0	7.732393768	0	0	0	0	7.230448947	0	0	8.863322861	8.875061264
NUDT21	0	0	0	0	0	0	0	0	0	0	0	5.986772182	6.113943686	0	0	0	0	0	0	0	0	0	0	0	0	0	0	0	0	0	0	0	0	0	0	0	0	0	0	0	0	0	0	0	0	0	0	8.113943356	8.176091262
SYNCRIP	0	0	0	0	0	0	0	0	0	0	0	0	0	0	0	0	6.414973515	6.04139308	6.397940182	0	0	0	0	0	0	7.612783867	0	0	7.414973365	7.785329842	7.681241246	7.041392725	0	0	6.690196169	0	0	7.908485024	0	7.732393768	0	0	0	0	7.20412001	0	0	8.778151251	8.785329836
SNRNP200	0	0	0	0	0	0	0	0	0	0	0	0	0	0	0	7.414973365	0	0	0	0	0	0	0	0	0	0	0	0	0	0	0	0	0	0	0	0	0	7.612783867	0	0	0	0	0	0	0	0	0	8.491361695	8.380211244
RSL1D1	0	0	0	0	0	0	0	0	0	0	6.531479045	6.301030213	6.447158186	6.79239176	6.73239384	6.724275952	0	0	0	0	0	0	0	0	0	0	0	0	6.73239384	0	0	0	0	0	0	0	0	7.857332502	0	0	0	0	0	0	0	0	0	7.146128067	0
LYPLA2	0	0	0	0	0	0	0	0	0	0	6.556302621	0	0	0	0	0	0	0	0	0	0	0	0	0	0	0	0	0	0	0	0	0	0	0	0	0	0	0	0	0	0	7.000000043	0	0	0	8.113943356	7.875061269	8.322219297	8.863322861
AHSA1	0	0	0	0	0	0	0	0	0	0	0	0	0	0	0	0	6.612783963	0	6.431363925	0	0	0	0	0	0	7.20412001	7.342422701	0	0	7.361727855	0	6.954242558	6.963787875	7.38021126	6.612783963	0	0	7.806179981	0	0	0	0	0	0	0	8.278753603	7.342422701	7.819543942	0
HSPA4L	0	0	0	0	0	0	0	0	0	0	0	0	0	0	0	0	6.556302621	6.919078145	6.982271278	6.763428068	7.041392725	6.869231778	0	7.041392725	0	0	7.963787832	8.041392689	7.43136378	7.505149992	0	7.681241246	0	7.113943386	6.579783711	7.176091288	0	0	0	0	0	0	0	0	0	8.39794001	7.832508919	8.531478918	7.954242514
BPNT1	0	0	0	0	0	0	0	0	0	0	0	0	0	0	0	0	0	0	0	0	0	0	0	0	0	0	0	0	0	0	0	7.38021126	0	0	0	0	0	0	0	0	0	0	0	0	0	7.414973365	7.113943386	0	0
HEXB	0	0	0	0	0	0	6.949390055	6.875061321	6.986771779	6.954242558	6.65321261	6.322219502	6.643452775	0	0	0	7.176091288	7.000000043	7.000000043	0	0	0	0	0	0	0	0	0	0	0	0	5.812914025	6.230449177	6.397940182	6.04139308	0	0	0	7.230448947	0	0	7.959041397	0	0	6.986771779	0	7.806179981	8.301029998	0
PARP1	7.041392725	0	0	0	0	0	0	0	0	0	0	0	0	0	0	0	0	6.633468557	6.612783963	0	0	0	0	0	0	7.20412001	7.146128067	7.447158047	7.230448947	7.342422701	7.491361708	7.939519258	0	0	0	0	0	7.491361708	0	0	0	0	0	0	0	0	0	7.913813858	0
PCNA	0	0	0	0	0	0	0	0	0	0	0	0	0	0	7.113943386	7.113943386	0	0	0	0	0	0	0	0	0	0	0	0	0	0	0	7.301030017	0	7.322219315	0	0	0	8.113943356	0	0	0	0	0	0	0	7.447158047	7.792391697	9.146128036	9.041392686
PRKAR2A	0	0	0	0	0	0	6.322219502	0	0	0	0	0	0	0	6.230449177	0	0	0	0	0	7.255272529	0	7.851258355	6.633468557	7.568201736	8.113943356	8.176091262	8.146128039	0	7.949390012	0	6.698970091	0	7.278753624	7.176091288	6.806180042	0	7.908485024	7.672097867	7.919078098	0	7.851258355	0	0	0	0	6.86332292	7.880813598	8.41497335
GSPT1	0	0	0	0	0	0	0	0	6.447158186	0	0	0	0	7.38021126	0	7.301030017	6.397940182	6.079181608	6.491361834	0	0	6.886490782	0	0	0	0	7.832508919	7.491361708	0	7.462398013	7.579783608	7.623249301	0	0	7.361727855	0	0	7.973127858	0	0	0	0	0	0	7.397940026	8.041392689	7.113943386	8.380211244	8.41497335
RPA2	0	0	0	0	0	0	0	0	0	0	0	0	0	0	0	0	0	0	5.968483416	0	0	0	0	0	0	0	6.886490782	0	0	0	0	0	0	0	0	0	0	0	0	0	0	0	0	0	0	0	0	8.690196081	8.380211244
PTPN1	0	0	0	0	0	0	0	0	6.812913423	0	0	0	0	0	0	0	0	0	0	0	0	0	0	0	0	0	0	0	0	0	0	0	0	0	0	0	0	7.875061269	0	0	0	0	0	0	0	0	0	8.146128039	8.361727838
COMT	6.342422878	0	0	0	7.230448947	7.20412001	0	6.977723651	7.176091288	7.53147893	7.740362697	7.602060002	7.653212523	7.146128067	7.20412001	7.176091288	7.230448947	7.278753624	7.079181282	0	7.113943386	0	0	0	0	8.204119985	8.602059992	8.41497335	0	7.897627097	0	7.462398013	7.20412001	7.43136378	0	0	0	8.819543936	0	0	0	0	8.07918125	0	7.113943386	8.39794001	7.230448947	8.826074803	7.819543942
HNRNPA2B1	0	0	0	0	0	0	0	0	0	0	0	0	0	0	0	0	7.447158047	0	0	0	0	0	7.079181282	6.875061321	6.531479045	7.230448947	7.462398013	7.322219315	7.799340556	7.944482677	7.986771739	7.397940026	7.079181282	7.322219315	7.230448947	6.763428068	6.986771779	7.934498456	0	7.880813598	0	0	7.255272529	0	7.38021126	8.041392689	0	9.079181246	8.944482673
RRM1	6.568201841	6.505150114	6.491361834	6.897627146	0	0	0	0	0	0	5.982271685	6.204120254	6.462398148	7.672097867	7.681241246	7.681241246	6.924279338	7.146128067	6.799340618	7.505149992	7.477121269	7.342422701	7.518513953	7.176091288	6.875061321	8.230448924	8.462397999	8.477121256	7.079181282	7.568201736	7.662757841	0	6.95904144	0	7.230448947	0	7.491361708	7.748188035	7.982271238	8.07918125	0	8.716003344	7.301030017	0	6.954242558	7.698970013	7.146128067	8.41497335	8.568201725
RPS12	0	0	0	0	0	0	0	0	7.079181282	0	0	0	0	0	0	0	6.770852085	7.20412001	7.113943386	0	0	0	0	0	0	0	7.361727855	7.43136378	7.623249301	7.681241246	7.690196089	7.716003352	0	7.447158047	7.623249301	0	6.982271278	8.342422683	0	0	0	0	0	0	7.748188035	8.113943356	7.278753624	8.934498452	8.903089988
DDX6	0	0	0	0	0	0	6.99122612	6.934498502	7.041392725	0	0	6.908485072	0	0	8.000000004	7.968482953	0	0	0	0	0	0	0	0	0	0	0	0	6.544068168	0	0	6.518514071	0	0	6.531479045	0	7.361727855	7.755874863	7.491361708	7.556302513	7.301030017	0	0	0	0	0	0	8.778151251	7.579783608
U2AF2	0	0	0	0	0	0	0	0	0	0	0	0	0	0	0	0	0	0	0	0	0	0	0	0	0	0	0	0	0	6.908485072	0	6.531479045	0	0	0	0	0	8.07918125	0	0	0	0	0	0	6.785329906	0	6.819544001	8.50514998	8.612783858
RPA1	0	0	0	0	0	0	0	0	0	0	0	0	0	0	0	0	0	0	0	0	0	0	0	0	0	0	0	0	0	0	0	0	0	0	0	0	0	0	0	0	0	0	0	0	0	0	0	8.698970005	8.568201725
PML	0	0	0	0	0	0	0	0	0	0	0	0	0	0	0	0	0	0	0	0	0	0	0	0	0	0	0	0	0	0	0	0	0	0	0	0	0	0	0	0	0	0	0	0	0	0	0	7.579783608	0
RPL9	0	0	0	6.903090041	6.929418977	6.86332292	6.707570261	6.857332557	6.806180042	6.755874932	7.000000043	6.939519303	6.929418977	7.301030017	7.20412001	7.38021126	7.38021126	7.361727855	7.43136378	0	0	0	0	0	0	7.230448947	7.361727855	0	7.113943386	7.43136378	7.322219315	7.079181282	6.785329906	0	6.724275952	0	0	8.698970005	0	0	0	0	0	0	7.740362697	7.623249301	7.255272529	8.770852012	8.880813593
HSPA4	0	0	0	0	0	0	0	6.690196169	0	6.568201841	6.591064718	0	0	0	0	0	6.770852085	6.908485072	6.949390055	6.908485072	7.000000043	6.838849154	0	7.000000043	6.875061321	7.799340556	7.707570185	7.869231726	7.43136378	7.322219315	0	7.934498456	7.301030017	7.748188035	7.806179981	7.176091288	0	0	0	0	7.763428001	7.886490731	0	0	0	8.50514998	7.949390012	8.612783858	8.681241238
SPR	0	0	0	0	0	0	0	0	0	0	0	0	0	0	6.591064718	0	6.73239384	6.845098102	0	0	0	0	0	0	0	0	0	0	0	0	0	7.113943386	0	0	0	0	0	8.041392689	0	0	0	7.748188035	0	0	0	0	6.919078145	8.204119985	7.832508919
RPL4	0	0	0	0	0	0	6.99122612	6.826074868	6.778151323	6.903090041	6.73239384	6.832508977	6.838849154	6.662757926	7.000000043	7.000000043	7.322219315	7.414973365	7.176091288	6.707570261	6.690196169	6.462398148	7.146128067	6.73239384	6.397940182	7.832508919	7.819543942	7.792391697	7.880813598	8.342422683	8.322219297	8.204119985	7.278753624	7.146128067	7.869231726	6.544068168	7.544068057	9.230448922	0	8.50514998	8.447158033	8.113943356	7.477121269	0	7.99122608	8.322219297	7.591064618	9.556302501	9.146128036
SRP14	0	0	0	0	0	0	0	0	0	0	0	0	0	6.662757926	6.579783711	6.518514071	0	6.838849154	0	0	0	0	6.230449177	0	0	0	0	0	0	8.602059992	8.477121256	6.897627146	0	0	0	0	0	8.342422683	0	0	8.591064608	0	0	0	0	0	7.397940026	7.672097867	8.662757833
FEN1	0	0	0	0	0	0	0	0	0	0	0	0	0	0	0	0	0	0	0	0	0	0	0	0	0	0	0	0	0	0	0	0	0	0	0	0	0	0	0	0	0	0	0	0	0	0	0	9.041392686	9.113943353
STAT1	0	0	0	0	0	0	6.924279338	6.968482995	6.949390055	6.716003427	6.04139308	5.755875618	0	0	0	0	0	6.6020601	6.531479045	0	0	0	0	6.146128346	0	7.000000043	0	6.857332557	0	0	0	6.806180042	0	0	6.342422878	0	0	7.740362697	0	0	0	0	7.20412001	0	7.20412001	0	0	7.995635199	9
MSH2	0	0	0	0	0	0	0	0	0	0	0	0	0	0	0	0	0	0	0	0	0	0	0	0	0	0	0	0	0	0	0	0	0	0	0	0	0	7.886490731	0	0	0	0	0	0	0	0	0	7.826074809	7.568201736
CBX5	0	0	0	0	0	0	0	0	0	0	0	0	0	0	0	0	0	0	0	0	0	0	0	0	0	0	0	0	0	0	0	0	0	0	0	0	0	0	0	0	0	0	0	0	0	0	0	0	0
RECQL	0	0	0	0	0	0	0	0	0	0	0	0	0	0	0	0	0	0	0	0	0	0	0	0	0	0	0	0	0	0	0	0	0	0	0	0	0	8.000000004	0	7.38021126	0	0	0	0	0	0	0	8.544068046	7.857332502
NSF	0	0	0	0	0	0	6.785329906	7.838849097	6.176091549	7.079181282	7.079181282	6.477121399	6.85125841	7.819543942	7.176091288	7.778151258	7.505149992	7.491361708	7.397940026	0	0	0	0	0	0	6.755874932	7.342422701	6.556302621	6.806180042	7.20412001	6.86332292	7.230448947	5.431365373	6.85125841	6.322219502	6.832508977	7.897627097	8.342422683	8.176091262	7.851258355	7.176091288	7.919078098	7.38021126	0	7.447158047	8.230448924	6.785329906	7.924279291	8.230448924
RPL28	0	0	0	0	0	0	0	0	0	0	0	0	0	6.986771779	6.986771779	6.963787875	6.146128346	6.04139308	5.963788299	0	0	0	0	0	0	0	0	0	0	0	7.505149992	7.778151258	0	0	0	6.79239176	0	0	0	0	0	0	0	0	0	0	0	8.72427587	8.518513941
MAP1B	0	0	0	0	0	0	0	0	0	0	0	0	0	0	0	0	0	0	0	0	0	0	0	0	0	0	0	0	0	0	0	0	0	0	0	0	0	0	0	0	0	0	0	0	0	0	0	0	7.732393768
ALDH7A1	0	0	0	0	0	0	6.838849154	0	7.000000043	6.681241328	6.806180042	0	6.806180042	0	0	0	0	0	6.9731279	0	0	0	0	0	0	7.681241246	8.000000004	7.845098046	0	0	7.255272529	0	0	0	6.857332557	0	0	7.602060002	0	0	0	7.278753624	0	0	0	0	0	8.602059992	8.778151251
HINT1	0	0	0	0	0	0	0	0	0	0	0	0	0	0	0	0	0	0	0	6.724275952	0	7.113943386	0	7.342422701	7.176091288	0	0	8.41497335	7.908485024	7.812913363	7.845098046	8.000000004	0	7.812913363	7.968482953	7.53147893	0	0	0	0	0	0	0	0	0	7.857332502	7.230448947	8.880813593	8.579783598
GMPS	0	0	0	0	0	0	0	0	0	0	0	0	0	0	0	0	0	0	0	0	0	0	0	0	0	0	0	0	0	0	0	0	0	0	0	0	0	7.556302513	0	0	0	0	0	0	0	0	6.27875383	9.113943353	8.929418926
RPL14	7.38021126	7.322219315	7.322219315	7.176091288	7.176091288	7.176091288	7.397940026	7.38021126	7.322219315	7.322219315	7.690196089	7.491361708	7.806179981	7.568201736	7.568201736	7.544068057	7.477121269	7.462398013	7.414973365	7.38021126	0	7.43136378	7.602060002	6.755874932	6.414973515	7.919078098	7.892094608	7.707570185	7.939519258	8.000000004	7.698970013	8.041392689	6.838849154	7.176091288	7.633468466	7.505149992	7.799340556	8.633468457	0	8.041392689	0	7.770852019	0	0	7.995635199	8.361727838	7.568201736	9.176091259	8.929418926
KPNA2	0	0	0	6.361728025	6.819544001	6.740362768	6.939519303	6.740362768	0	6.67209795	5.230451476	5.690196966	0	0	0	0	0	0	7.301030017	0	0	0	0	0	0	6.812913423	6.681241328	7.255272529	0	0	0	7.146128067	6.919078145	6.612783963	6.544068168	0	0	7.716003352	0	7.38021126	6.690196169	0	0	0	0	8.07918125	7.892094608	7.838849097	8.041392689
HNRNPF	0	0	0	0	0	0	0	0	0	0	0	0	0	0	0	6.568201841	0	0	0	0	0	0	0	0	0	7.672097867	7.146128067	7.53147893	7.838849097	7.278753624	7.43136378	7.278753624	0	6.380211423	5.908485555	6.414973515	6.929418977	8.531478918	7.602060002	7.662757841	7.612783867	7.556302513	0	0	7.230448947	7.176091288	0	8.74036269	8.832508913
SMS	0	0	0	0	0	0	6.908485072	6.491361834	6.869231778	6.812913423	6.633468557	0	0	0	0	0	0	0	6.380211423	0	0	0	0	0	0	0	0	0	0	0	0	0	0	7.633468466	6.845098102	0	0	0	0	0	0	0	0	0	6.799340618	8.07918125	7.146128067	8.301029998	7.919078098
BLVRA	0	0	0	0	0	0	6.000000434	6.919078145	6.568201841	5.880814164	0	0	0	0	0	0	0	0	0	0	0	0	0	0	0	0	0	0	0	0	0	7.113943386	0	0	6.929418977	0	6.763428068	0	0	0	0	0	0	0	7.43136378	0	7.20412001	8.568201725	8.342422683
USP14	0	0	0	0	0	0	0	0	0	0	0	0	0	0	0	0	6.73239384	0	6.724275952	6.826074868	6.643452775	6.579783711	6.568201841	6.462398148	6.568201841	7.556302513	7.447158047	7.505149992	0	0	0	7.342422701	6.9731279	6.845098102	6.886490782	6.698970091	0	0	0	0	0	7.653212523	0	0	0	7.97772361	6.924279338	8.544068046	8.79239169
EIF5	0	0	0	0	0	0	0	0	0	0	0	0	0	6.462398148	6.431363925	6.531479045	7.113943386	0	6.230449177	0	6.380211423	0	0	0	0	6.934498502	7.000000043	6.826074868	6.806180042	6.832508977	7.000000043	7.079181282	7.041392725	6.146128346	0	0	0	0	0	0	7.414973365	7.518513953	0	0	0	7.924279291	7.278753624	8.278753603	8.278753603
EIF3B	0	0	0	7.361727855	0	6.986771779	0	0	7.301030017	7.342422701	0	0	0	0	6.342422878	0	7.462398013	6.27875383	0	0	0	0	0	0	0	7.612783867	6.949390055	0	6.556302621	0	0	7.230448947	6.875061321	7.176091288	7.278753624	7.146128067	6.633468557	8.278753603	0	7.518513953	7.414973365	0	0	0	7.041392725	7.518513953	7.113943386	8.748188028	8.892094603
EIF3E	0	0	0	0	0	0	6.929418977	0	6.886490782	0	0	0	0	6.414973515	0	0	6.544068168	0	0	0	0	0	0	0	0	0	0	0	0	0	0	0	0	7.518513953	7.477121269	0	0	7.041392725	7.361727855	0	0	0	0	0	0	7.556302513	6.342422878	8.732393761	8.819543936
COPS2	0	0	0	0	0	7.414973365	6.913813905	7.041392725	0	0	0	0	0	7.568201736	0	0	0	0	0	0	0	0	0	0	0	7.491361708	0	7.414973365	0	7.612783867	0	6.755874932	0	7.113943386	6.95904144	6.897627146	0	7.973127858	0	0	0	7.863322866	0	0	0	0	7.278753624	7.414973365	8.255272508
RPS7	0	0	0	0	0	0	0	0	0	0	0	0	0	7.278753624	7.278753624	7.278753624	7.579783608	7.643452686	7.740362697	0	0	0	6.799340618	6.431363925	6.397940182	7.230448947	0	7.38021126	7.851258355	7.544068057	6.892094658	7.43136378	0	7.041392725	7.342422701	0	7.255272529	8.591064608	0	0	7.929418931	7.544068057	0	0	7.568201736	8.278753603	7.322219315	8.939519253	9.079181246
RPS16	0	0	0	0	0	0	7.20412001	0	7.176091288	0	6.763428068	6.65321261	6.690196169	0	0	0	7.041392725	7.278753624	7.113943386	0	7.301030017	7.322219315	0	7.176091288	0	7.672097867	7.643452686	7.959041397	7.301030017	7.491361708	7.934498456	7.97772361	6.67209795	6.763428068	7.414973365	7.278753624	0	8.924279287	8.000000004	8.204119985	7.99122608	8.230448924	7.707570185	0	7.949390012	8.491361695	7.875061269	9.342422681	9.204119983
RPS23	0	5.832509551	0	0	0	0	0	0	0	0	0	0	0	7.000000043	7.000000043	6.99122612	7.43136378	7.447158047	7.43136378	0	6.6020601	0	0	0	0	6.954242558	7.770852019	7.653212523	7.732393768	7.913813858	7.812913363	7.934498456	0	6.86332292	7.826074809	0	7.462398013	8.662757833	0	7.875061269	7.924279291	0	0	0	7.672097867	8.176091262	7.361727855	8.908485019	8.748188028
RPS18	6.27875383	6.431363925	0	0	0	0	6.880813649	6.897627146	6.826074868	6.812913423	0	0	6.342422878	0	0	0	0	7.38021126	7.38021126	7.113943386	7.079181282	7.176091288	6.763428068	0	0	7.255272529	7.447158047	7.38021126	7.255272529	7.518513953	7.38021126	7.612783867	6.579783711	7.255272529	7.875061269	6.86332292	0	8.612783858	0	7.963787832	0	8.000000004	0	0	7.505149992	8.447158033	7.662757841	8.755874856	9.041392686
SNRPD1	0	0	0	0	0	0	0	0	0	0	0	0	0	7.897627097	7.43136378	7.518513953	6.079181608	6.591064718	0	0	0	0	0	0	0	7.633468466	0	0	8.041392689	7.785329842	7.740362697	7.633468466	0	5.322221363	0	0	0	7.954242514	0	0	7.255272529	0	0	0	7.230448947	0	7.176091288	8.707570177	9.041392686
ETF1	0	0	0	0	0	0	6.579783711	6.544068168	0	0	0	0	0	0	0	0	0	0	0	0	0	0	6.544068168	0	0	0	0	0	7.000000043	0	0	7.20412001	0	7.113943386	7.146128067	0	0	0	0	0	0	0	0	0	0	7.995635199	7.447158047	8.41497335	8.462397999
RPS15	0	0	0	0	0	0	0	0	0	0	0	0	0	8.146128039	0	8.146128039	7.079181282	7.591064618	0	0	0	0	6.99122612	0	0	0	0	7.851258355	0	7.633468466	7.556302513	0	0	0	7.079181282	0	6.799340618	8.113943356	0	0	7.278753624	0	0	0	0	7.740362697	0	8.342422683	0
RPL10A	0	0	0	0	0	0	6.414973515	0	0	0	6.812913423	6.65321261	0	0	7.447158047	0	6.342422878	6.27875383	6.591064718	0	0	0	0	0	0	7.176091288	7.414973365	0	7.230448947	7.255272529	0	7.041392725	0	7.041392725	7.301030017	0	0	8.361727838	7.146128067	7.602060002	7.579783608	0	0	0	6.892094658	7.785329842	0	9.255272505	9.380211242
TRA2B	0	0	0	0	0	0	0	0	0	0	0	0	0	0	0	0	0	0	0	0	0	0	0	0	0	0	0	0	0	0	0	0	0	0	0	0	0	0	0	0	0	0	0	0	6.934498502	0	0	8.39794001	8.07918125
AP2B1	7.146128067	7.113943386	7.113943386	0	0	0	6.9731279	6.832508977	6.785329906	7.113943386	6.785329906	0	6.204120254	0	0	0	0	6.755874932	6.869231778	0	0	0	0	6.579783711	6.431363925	7.681241246	7.755874863	7.716003352	7.544068057	7.477121269	7.579783608	7.301030017	7.838849097	7.414973365	7.20412001	7.20412001	6.875061321	7.643452686	7.875061269	7.748188035	7.633468466	7.230448947	7.342422701	0	7.799340556	8.785329836	7.653212523	8.939519253	9.079181246
RPL38	0	0	0	0	0	0	0	0	0	0	0	0	0	6.322219502	6.579783711	0	6.892094658	6.944482722	0	0	0	0	0	0	0	0	0	0	0	7.544068057	7.230448947	7.041392725	0	6.146128346	6.491361834	0	7.146128067	7.924279291	0	0	0	0	0	0	7.755874863	8.113943356	7.414973365	0	8.556302502
PAFAH1B2	0	0	0	0	0	0	6.491361834	5.929419437	6.04139308	0	6.380211423	6.477121399	0	0	0	6.944482722	6.431363925	7.041392725	6.79239176	0	6.591064718	0	6.826074868	0	0	7.462398013	7.462398013	7.778151258	7.38021126	7.447158047	7.732393768	6.544068168	0	6.079181608	5.869232307	6.698970091	0	0	0	0	0	8.113943356	6.95904144	0	7.505149992	8.361727838	7.544068057	8.301029998	8.886490726
PRKDC	0	0	0	0	0	0	6.698970091	6.869231778	6.462398148	6.146128346	7.113943386	7.230448947	6.845098102	7.342422701	7.079181282	7.176091288	6.623249394	6.591064718	0	0	0	0	0	0	0	7.000000043	6.799340618	6.568201841	6.623249394	6.857332557	6.65321261	6.73239384	0	0	5.643453664	0	0	8.278753603	0	7.38021126	0	0	0	0	7.301030017	7.000000043	6.447158186	8.556302502	8.763427994
FKBP4	0	0	0	0	6.146128346	0	0	0	0	0	0	0	0	0	0	0	6.531479045	6.477121399	0	0	6.518514071	0	6.892094658	6.643452775	6.113943686	7.740362697	7.602060002	7.763428001	7.146128067	0	0	7.518513953	7.602060002	6.908485072	7.322219315	7.20412001	7.491361708	7.763428001	7.462398013	7.716003352	0	0	0	0	6.875061321	8.146128039	7.38021126	9.113943353	8.79934055
RPL18	6.99122612	0	0	0	0	0	0	7.079181282	0	0	6.954242558	0	6.913813905	6.924279338	7.113943386	0	6.755874932	7.397940026	6.612783963	0	6.832508977	6.643452775	7.000000043	6.643452775	0	8.000000004	7.954242514	8.07918125	8.278753603	8.041392689	8.041392689	8.146128039	7.113943386	7.672097867	7.544068057	7.556302513	7.113943386	7.863322866	8.113943356	8.322219297	7.959041397	8.255272508	0	0	7.924279291	8.72427587	7.913813858	9.113943353	8.919078093
ARHGAP1	0	0	0	0	0	0	0	0	0	0	0	0	0	0	0	0	0	0	0	0	0	0	0	0	0	0	0	0	0	0	0	0	0	0	0	0	0	7.819543942	0	0	0	0	0	0	0	0	7.176091288	8.579783598	8.278753603
CRYZ	0	0	0	0	0	0	6.963787875	0	6.755874932	0	6.908485072	6.724275952	0	0	0	0	0	0	0	0	0	0	0	0	0	0	0	0	0	0	0	7.505149992	0	0	0	0	0	0	0	0	0	8.146128039	0	0	0	0	0	8.39794001	8.204119985
PPID	0	0	0	0	0	0	0	0	0	0	0	0	0	0	0	0	0	6.204120254	6.04139308	0	6.176091549	6.04139308	5.963788299	0	0	7.146128067	7.146128067	7.544068057	0	0	0	7.414973365	0	0	0	7.414973365	7.724275878	6.204120254	0	6.505150114	7.000000043	8.041392689	6.897627146	0	0	8.113943356	6.9731279	7.929418931	8.278753603
SSRP1	0	0	0	0	0	0	0	0	0	0	0	0	0	0	0	0	0	0	0	0	0	0	0	0	0	0	0	0	0	0	0	6.716003427	0	0	0	0	0	0	0	0	0	0	0	0	0	0	0	8.50514998	8.462397999
RBBP4	0	0	0	0	0	0	0	0	0	0	0	0	0	0	0	0	0	0	0	0	0	0	0	0	0	7.832508919	0	7.462398013	7.518513953	6.977723651	6.869231778	6.913813905	6.623249394	0	6.531479045	0	0	6.806180042	0	0	0	0	0	0	7.041392725	0	0	9.146128036	8.863322861
SF3A3	0	0	0	0	0	0	0	0	0	0	0	0	0	0	6.681241328	0	0	0	0	0	0	0	0	0	0	0	0	0	0	0	0	0	0	0	0	0	0	0	0	0	0	0	0	0	0	0	0	8.113943356	8.278753603
ILF2	0	0	0	0	0	0	0	0	0	0	0	0	0	0	6.591064718	0	0	0	0	0	0	0	0	0	0	0	0	0	0	0	0	0	0	0	0	0	0	0	0	0	0	0	0	0	0	0	0	8.39794001	8.322219297
ILF3	0	0	0	0	0	0	0	0	0	0	0	0	0	0	0	0	0	0	0	0	0	0	0	0	0	0	0	0	0	0	0	0	0	0	0	0	0	0	0	0	0	0	0	0	0	0	0	7.954242514	8.041392689
HNRNPA0	0	0	0	0	0	0	0	0	0	0	6.65321261	0	0	0	0	0	0	0	0	0	0	0	0	0	0	7.230448947	7.568201736	7.591064618	7.963787832	7.880813598	7.959041397	7.556302513	7.079181282	7.518513953	7.505149992	0	0	8.176091262	0	0	0	0	0	0	0	8.041392689	0	8.903089988	9.278753601
TRIM28	0	0	0	0	0	0	0	0	0	0	0	0	0	0	0	0	0	0	0	0	0	0	0	0	0	0	0	0	0	0	0	0	0	0	0	0	0	8.230448924	0	0	0	0	0	0	7.255272529	0	0	8.39794001	8.278753603
EIF3I	0	0	0	0	0	0	0	0	0	0	0	0	0	6.924279338	6.579783711	6.414973515	6.968482995	0	6.579783711	0	0	0	0	0	0	7.491361708	0	6.763428068	0	0	0	6.724275952	7.146128067	6.662757926	6.785329906	0	0	8.041392689	0	0	0	0	0	0	7.079181282	7.397940026	7.20412001	8.778151251	8.944482673
DYNC1I2	0	0	0	0	0	0	0	0	0	0	0	0	0	6.544068168	0	6.556302621	0	0	0	0	0	0	0	0	0	7.505149992	7.53147893	7.342422701	0	0	0	0	0	0	0	0	0	7.643452686	0	0	0	6.591064718	0	0	0	8.000000004	7.342422701	8.146128039	8.518513941
HDAC1	0	0	0	0	0	0	6.322219502	6.67209795	0	0	4.959046165	0	0	0	7.447158047	0	0	0	0	0	0	0	0	0	0	0	0	0	0	0	0	0	0	0	0	0	0	7.000000043	0	7.414973365	0	0	0	0	0	0	0	8.544068046	8.431363766
IDI1	0	0	0	0	0	0	0	0	0	0	0	0	0	0	0	0	0	0	0	0	0	0	0	0	0	0	0	0	0	0	0	0	0	0	0	0	0	7.869231726	0	0	0	0	0	0	0	7.397940026	7.518513953	8.113943356	8.462397999
CKAP5	0	0	0	0	0	0	0	0	0	0	0	0	0	0	0	0	0	0	0	0	0	0	0	0	0	0	0	0	0	0	0	0	0	0	0	0	6.924279338	0	0	0	0	0	0	0	0	0	0	0	7.397940026
EIF3A	0	0	0	0	0	0	6.414973515	0	0	0	0	0	0	0	0	0	0	6.643452775	6.724275952	0	0	0	0	0	0	6.86332292	0	6.819544001	6.778151323	0	0	6.342422878	0	6.944482722	6.176091549	0	0	7.740362697	0	7.518513953	0	0	0	0	6.755874932	7.995635199	7.278753624	8.72427587	8.95424251
MCM6	0	0	0	0	0	0	0	0	0	0	0	0	0	0	0	0	0	0	0	0	0	0	0	0	0	0	0	0	0	0	0	6.230449177	0	0	0	0	0	7.913813858	0	0	0	0	0	0	0	0	0	8.72427587	8.322219297
EFTUD2	0	0	0	0	0	0	0	0	0	0	0	0	0	0	0	0	6.146128346	6.342422878	6.342422878	0	0	8.204119985	0	0	0	8.50514998	8.462397999	8.50514998	0	0	0	7.079181282	7.986771739	0	8.591064608	7.959041397	0	7.763428001	0	0	0	0	0	0	0	0	0	8.681241238	9.041392686
EIF4H	0	0	0	0	0	0	0	0	0	0	0	0	0	0	0	0	6.431363925	6.886490782	6.85125841	0	0	0	0	0	0	0	0	0	0	0	0	7.322219315	7.146128067	0	7.278753624	0	0	0	0	0	0	0	0	0	0	8.204119985	7.113943386	8.146128039	8.301029998
PEA15	0	0	0	0	0	0	0	0	0	0	0	0	0	0	0	0	0	0	0	0	0	0	0	0	0	0	7.146128067	0	0	0	0	6.230449177	6.079181608	6.819544001	6.27875383	0	0	0	0	7.322219315	7.491361708	7.491361708	0	0	0	7.397940026	7.041392725	7.591064618	7.556302513
NONO	0	0	0	6.99122612	0	0	6.778151323	7.544068057	5.643453664	0	7.20412001	5.939519752	6.255272746	7.845098046	7.819543942	7.838849097	0	6.716003427	6.04139308	0	0	0	0	0	0	7.342422701	7.447158047	7.322219315	7.869231726	7.880813598	7.707570185	7.041392725	0	6.977723651	7.000000043	0	0	8.863322861	0	7.778151258	7.079181282	0	0	0	7.612783867	7.43136378	0	8.79934055	8.74036269
PPP1R7	0	0	0	0	0	0	0	0	0	0	6.913813905	6.633468557	6.716003427	0	0	0	7.079181282	6.544068168	6.977723651	6.079181608	6.04139308	0	5.544069285	0	0	7.653212523	7.278753624	0	7.000000043	7.146128067	0	6.944482722	6.79239176	6.67209795	0	0	0	7.591064618	8.000000004	7.785329842	7.579783608	8.07918125	7.146128067	0	0	7.690196089	6.986771779	0	7.748188035
PSMD5	0	0	0	0	6.643452775	6.568201841	0	0	0	0	0	0	0	7.079181282	7.20412001	7.113943386	6.662757926	6.748188105	6.869231778	0	6.397940182	0	0	0	0	7.857332502	7.491361708	7.707570185	0	7.361727855	0	6.806180042	0	6.301030213	0	0	7.342422701	7.838849097	7.886490731	7.806179981	0	8.07918125	0	0	0	7.851258355	0	8.146128039	8.176091262
DDB1	0	0	0	0	0	0	0	0	0	0	0	0	0	6.079181608	0	0	0	0	6.361728025	0	0	0	0	0	0	0	0	0	0	0	0	0	0	0	0	0	0	7.53147893	0	0	0	0	0	0	6.380211423	7.462398013	6.579783711	8.278753603	8.50514998
RBBP7	0	0	0	0	0	0	0	0	0	0	0	0	0	0	0	0	0	0	0	0	0	0	6.462398148	6.531479045	0	7.602060002	7.53147893	7.301030017	0	0	0	6.913813905	6.623249394	0	6.531479045	0	0	0	0	0	0	0	0	0	7.041392725	0	0	9.146128036	8.716003344
HNRNPUL2	0	0	0	0	0	0	0	0	0	0	0	0	0	0	0	0	0	0	0	0	0	0	0	0	0	0	0	0	0	0	0	0	0	0	0	0	0	8.041392689	0	0	0	0	0	0	0	0	0	8.690196081	8.74036269
PDCD4	0	0	0	0	0	0	0	0	0	0	0	0	0	0	0	0	0	0	0	0	0	0	0	0	0	0	0	0	0	0	0	0	0	0	0	0	0	0	0	0	0	0	0	0	0	0	0	7.832508919	7.653212523
HP1BP3	0	0	0	0	0	7.20412001	0	0	0	0	0	0	0	8.000000004	0	0	0	0	0	0	0	0	0	0	0	0	6.724275952	0	6.924279338	0	6.707570261	0	0	0	0	0	0	7.968482953	0	0	0	0	0	0	0	0	0	8.79239169	8.204119985
UBR4	0	0	0	6.716003427	6.73239384	6.806180042	5.832509551	0	0	0	0	0	5.8573331	7.079181282	6.886490782	6.9731279	6.531479045	6.380211423	6.176091549	0	0	0	6.146128346	0	0	0	0	0	7.20412001	0	0	6.763428068	6.204120254	6.880813649	6.322219502	6.707570261	7.041392725	7.653212523	7.361727855	7.568201736	6.579783711	7.643452686	7.176091288	0	0	7.477121269	6.204120254	8.230448924	8.342422683
HUWE1	0	0	0	0	0	0	6.397940182	0	0	0	6.380211423	0	0	7.146128067	7.113943386	7.000000043	0	0	0	6.579783711	0	0	0	0	0	5.968483416	6.982271278	6.623249394	0	0	0	0	0	0	0	0	7.041392725	7.838849097	7.518513953	7.633468466	7.079181282	7.724275878	6.799340618	0	6.875061321	7.826074809	6.397940182	7.633468466	7.491361708
CAND1	0	0	0	0	0	6.322219502	6.414973515	6.716003427	6.6020601	6.342422878	0	0	0	6.462398148	7.462398013	7.113943386	6.690196169	6.995635238	6.681241328	6.531479045	0	6.623249394	6.342422878	6.763428068	6.462398148	7.806179981	7.579783608	7.740362697	6.857332557	7.447158047	7.361727855	6.716003427	6.531479045	6.568201841	7.785329842	0	7.518513953	7.491361708	8.301029998	7.880813598	7.447158047	8.361727838	7.230448947	0	7.462398013	8.518513941	7.880813598	8.568201725	8.681241238
ABCF1	0	0	0	0	0	6.623249394	0	0	0	0	0	0	0	0	0	0	0	0	0	0	0	0	0	0	0	0	0	0	0	7.361727855	0	6.342422878	6.361728025	6.968482995	5.653213479	0	0	7.826074809	0	7.342422701	0	0	0	0	6.79239176	0	0	7.929418931	7.892094608
NPLOC4	0	0	0	0	0	0	0	0	0	0	0	0	0	0	0	0	6.755874932	0	0	0	0	0	0	0	0	0	7.322219315	7.176091288	0	0	0	0	0	0	0	0	0	6.954242558	0	0	0	0	0	0	0	0	7.342422701	8.255272508	8.681241238
IPO4	0	0	0	0	0	0	6.230449177	6.643452775	6.146128346	6.27875383	0	0	0	6.230449177	6.612783963	6.963787875	0	6.903090041	0	0	0	0	0	0	0	5.949390495	0	0	0	0	0	6.748188105	0	6.477121399	6.431363925	0	0	8.000000004	0	7.146128067	0	0	0	0	0	8.041392689	7.397940026	7.342422701	8.278753603
ANP32B	0	0	0	0	0	0	0	0	0	0	0	0	0	0	0	0	0	0	0	0	0	0	0	0	0	0	0	0	0	0	0	7.113943386	0	6.491361834	0	0	0	0	0	0	0	0	0	0	0	0	0	8.518513941	8.812913357
HDAC2	0	0	0	0	0	0	6.322219502	6.67209795	0	0	4.959046165	0	0	0	7.447158047	0	0	0	0	0	0	0	0	0	0	0	0	0	0	0	0	0	0	0	0	0	0	6.913813905	0	7.414973365	0	0	0	0	0	0	0	8.544068046	8.477121256
UPF1	0	0	0	0	0	0	0	0	0	0	0	0	0	0	0	0	0	0	0	0	0	0	0	0	0	0	0	6.447158186	6.740362768	6.65321261	6.505150114	0	0	5.602061077	5.897627641	0	0	7.672097867	0	0	0	0	0	0	0	7.079181282	6.462398148	8.41497335	8.380211244
TNPO1	0	0	0	0	6.447158186	6.342422878	6.505150114	0	6.531479045	0	0	6.531479045	0	0	7.361727855	0	6.707570261	6.612783963	6.875061321	0	0	0	0	0	0	6.716003427	0	0	6.361728025	0	0	7.20412001	7.20412001	6.518514071	6.491361834	0	7.414973365	7.785329842	0	7.477121269	0	7.897627097	7.230448947	0	7.146128067	8.591064608	7.255272529	8.146128039	9.079181246
IPO9	0	0	0	0	0	0	0	0	0	0	0	0	0	0	0	0	0	0	0	0	0	0	0	0	0	0	0	0	0	0	0	7.113943386	0	6.949390055	6.755874932	0	0	0	0	0	0	0	0	0	0	7.556302513	6.982271278	0	0
VPS35	0	0	6.477121399	0	0	0	6.954242558	6.913813905	6.875061321	6.963787875	6.748188105	6.812913423	6.716003427	6.361728025	6.380211423	6.27875383	6.934498502	6.982271278	6.982271278	6.954242558	6.505150114	6.939519303	7.20412001	5.924279803	6.255272746	8.000000004	8.000000004	8.07918125	7.20412001	7.397940026	7.176091288	7.591064618	0	6.963787875	7.505149992	7.176091288	7.477121269	7.716003352	7.716003352	7.690196089	7.653212523	8.301029998	7.079181282	0	7.53147893	8.255272508	7.43136378	8.959041393	9.176091259
MYBBP1A	0	0	0	0	0	0	0	0	0	0	0	5.79239239	0	0	6.838849154	0	0	0	0	0	0	0	0	0	0	0	0	0	0	0	0	0	0	0	0	0	0	0	0	0	0	0	0	0	0	0	0	7.892094608	7.716003352
ESYT1	0	0	0	0	0	0	6.462398148	6.544068168	6.643452775	6.518514071	6.99122612	6.954242558	6.908485072	0	0	0	0	0	0	0	0	0	0	0	0	0	0	0	0	0	0	7.53147893	0	7.477121269	0	7.079181282	0	0	0	0	0	0	0	0	7.342422701	7.447158047	0	7.518513953	8.000000004
COPS4	0	0	0	0	0	0	0	0	0	0	0	0	0	0	0	0	0	0	0	0	0	0	0	0	0	6.869231778	0	0	0	0	0	0	0	0	0	0	0	0	0	0	0	0	0	0	0	7.113943386	6.897627146	7.799340556	8.230448924
NAA15	0	0	0	0	0	0	0	6.491361834	6.204120254	0	0	0	0	8.146128039	7.43136378	0	0	0	0	0	0	0	0	0	0	7.041392725	0	0	0	0	0	0	0	0	6.832508977	0	8.07918125	8.342422683	7.857332502	8.000000004	0	7.832508919	0	0	0	7.544068057	0	8.342422683	8.568201725
XRN2	0	0	0	0	0	0	0	0	0	0	0	0	0	0	0	0	0	0	0	0	0	0	0	0	0	0	0	0	0	0	0	0	0	0	0	0	0	0	0	0	0	0	0	0	0	0	0	7.770852019	8.380211244
RNPEP	0	0	0	0	0	0	6.886490782	0	0	0	6.662757926	0	6.431363925	7.322219315	7.53147893	0	6.913813905	7.397940026	7.322219315	6.079181608	0	0	0	0	0	7.812913363	7.041392725	7.633468466	0	0	0	0	0	6.633468557	6.579783711	0	7.000000043	0	8.000000004	0	0	8.380211244	0	0	7.041392725	7.875061269	7.301030017	8.176091262	8.755874856
DCTPP1	0	0	0	0	0	0	7.322219315	0	5.944483166	0	6.079181608	0	5.681242142	7.643452686	7.633468466	7.612783867	6.845098102	0	0	0	0	0	0	0	0	0	0	0	0	0	0	0	0	0	0	0	0	0	0	6.903090041	0	0	0	0	0	0	6.929418977	0	0
MOB1A	0	0	0	0	0	0	6.623249394	6.612783963	0	0	0	0	0	0	0	0	7.146128067	0	7.146128067	0	0	0	0	0	6.230449177	7.785329842	7.568201736	7.591064618	7.146128067	0	0	7.748188035	0	7.447158047	7.568201736	6.986771779	7.255272529	7.662757841	8.113943356	7.869231726	7.778151258	8.07918125	7.113943386	0	7.38021126	8.361727838	8.07918125	8.278753603	8.633468457
XPNPEP1	0	0	0	0	0	0	6.342422878	0	0	0	0	0	0	0	0	0	6.462398148	7.000000043	6.949390055	7.176091288	7.041392725	6.995635238	6.707570261	6.6020601	6.612783963	8.255272508	7.908485024	8.000000004	7.579783608	7.447158047	7.361727855	7.079181282	6.361728025	6.770852085	6.518514071	7.20412001	7.477121269	7.982271238	8.380211244	7.954242514	7.778151258	8.278753603	7.556302513	0	7.176091288	7.99122608	7.477121269	8.491361695	8.95424251
DDX19A	0	0	0	0	0	0	0	0	0	0	0	0	0	0	0	0	0	0	0	0	0	0	0	0	0	0	0	0	0	0	0	7.079181282	0	0	6.531479045	0	0	7.903089992	0	0	0	0	0	0	7.146128067	7.875061269	0	8.113943356	8.113943356
RCC2	0	0	0	0	0	0	0	0	0	0	0	0	0	6.361728025	0	0	0	0	0	0	0	0	0	0	0	0	0	0	0	0	0	0	0	0	0	0	0	0	0	0	0	0	0	0	0	0	0	8.995635195	8.857332497
SAE1	0	0	0	0	0	0	0	0	0	0	0	0	0	0	0	0	0	0	0	0	0	0	0	0	0	0	0	0	0	0	0	0	0	0	0	0	0	0	0	0	0	0	0	0	0	0	0	0	7.778151258
PRPF19	0	0	0	0	0	0	0	0	0	0	0	0	0	0	6.204120254	0	0	0	0	0	0	0	0	0	0	0	0	6.79239176	0	0	0	7.000000043	0	0	0	0	0	0	0	0	0	0	0	0	0	0	0	9	9
SNX6	0	0	0	0	0	0	0	0	0	0	0	0	0	0	0	0	0	0	0	0	0	0	6.556302621	6.146128346	0	7.518513953	7.53147893	7.591064618	0	0	0	7.113943386	0	0	0	0	0	7.973127858	0	0	7.653212523	8.07918125	0	0	0	0	6.806180042	8.230448924	8.591064608
COPS3	0	0	0	0	0	0	0	0	0	0	0	0	0	0	0	0	0	0	0	0	0	0	5.973128316	0	0	7.20412001	6.908485072	0	0	0	0	6.204120254	0	5.968483416	0	0	0	0	0	0	0	7.740362697	0	0	7.000000043	0	7.041392725	7.982271238	8.07918125
EIF3L	0	0	0	0	0	0	6.491361834	0	0	0	0	0	0	6.342422878	6.342422878	0	0	0	0	0	0	0	0	0	0	6.819544001	6.85125841	7.041392725	6.65321261	0	0	6.491361834	0	0	5.863323455	0	0	7.851258355	0	7.716003352	7.041392725	0	0	0	6.707570261	7.913813858	6.977723651	8.892094603	8.995635195
NOP58	0	0	0	0	0	0	0	0	0	0	0	0	0	0	0	0	0	0	0	0	0	0	0	0	0	0	0	0	0	0	0	0	0	0	0	0	0	8.041392689	0	0	0	0	0	0	0	0	0	8.176091262	8.176091262
PPME1	0	0	0	0	0	0	0	0	0	0	0	0	0	0	0	0	0	0	0	0	0	0	0	0	0	0	0	0	0	0	0	0	0	0	6.27875383	0	0	0	0	0	0	0	0	0	0	7.785329842	0	8.41497335	8.681241238
SUPT16H	0	0	0	0	0	0	0	0	0	0	0	0	0	0	6.982271278	0	0	0	0	0	0	0	0	0	0	0	0	0	0	0	0	6.633468557	0	0	0	0	0	0	0	0	0	0	0	0	0	0	0	8.462397999	8.361727838
PSAT1	0	0	0	0	0	0	0	0	0	0	0	0	0	0	0	0	6.681241328	6.707570261	6.73239384	7.556302513	6.785329906	6.544068168	7.724275878	0	0	0	8.361727838	8.301029998	7.505149992	7.612783867	7.556302513	7.944482677	6.662757926	6.633468557	6.924279338	6.85125841	7.623249301	8.146128039	8.322219297	8.176091262	7.740362697	8.908485019	7.806179981	0	7.278753624	8.568201725	0	7.968482953	0
COPG1	0	0	0	0	0	0	6.85125841	6.819544001	6.954242558	6.491361834	7.000000043	7.146128067	7.079181282	6.755874932	6.770852085	6.763428068	7.079181282	7.041392725	7.000000043	0	0	0	6.380211423	0	0	6.6020601	6.662757926	7.255272529	6.770852085	7.146128067	7.20412001	6.857332557	0	6.255272746	6.04139308	6.447158186	0	8.380211244	7.602060002	7.832508919	7.38021126	7.602060002	7.000000043	0	7.301030017	7.826074809	7.041392725	8.544068046	9.146128036
FBL	0	0	0	0	0	0	0	0	0	0	0	0	0	0	0	0	0	0	0	0	0	0	0	0	0	0	0	0	0	0	0	0	0	0	0	0	0	7.880813598	0	0	0	0	0	0	6.579783711	0	0	0	7.623249301
RPS5	0	0	0	0	0	0	7.113943386	7.146128067	0	7.079181282	0	0	0	6.505150114	7.301030017	6.301030213	7.361727855	7.113943386	7.000000043	6.748188105	6.662757926	0	0	6.612783963	0	8.113943356	7.672097867	7.724275878	8.113943356	7.633468466	7.812913363	7.707570185	6.380211423	7.579783608	6.880813649	7.322219315	7.643452686	8.832508913	0	8.462397999	8.322219297	8.000000004	0	0	7.301030017	8.342422683	7.851258355	9.230448922	9.301029996
DAZAP1	0	0	0	0	0	0	0	0	0	0	0	0	0	0	0	0	0	0	0	0	0	0	0	0	0	0	0	0	0	0	0	0	0	0	0	0	0	0	0	0	0	0	0	0	0	0	0	0	8.255272508
ADSL	0	0	0	0	6.799340618	6.681241328	0	0	0	0	6.505150114	0	0	7.176091288	6.886490782	6.949390055	6.690196169	6.748188105	0	6.431363925	0	6.397940182	7.397940026	0	0	7.897627097	8.342422683	8.278753603	7.939519258	7.99122608	7.462398013	0	5.968483416	0	0	0	7.690196089	7.707570185	0	0	7.113943386	8.230448924	7.732393768	0	7.113943386	7.838849097	7.255272529	7.851258355	8.113943356
CHD4	0	0	0	0	0	0	0	0	0	0	5.832509551	0	0	0	7.322219315	0	0	0	0	0	0	0	0	0	0	0	0	0	0	0	0	0	0	0	0	0	0	7.851258355	0	0	0	0	0	0	0	0	0	7.968482953	7.934498456
PABPC4	0	0	0	0	0	6.799340618	0	0	0	0	0	0	0	7.255272529	7.230448947	6.755874932	7.113943386	7.079181282	7.041392725	6.755874932	6.462398148	6.531479045	6.778151323	6.544068168	6.491361834	8.146128039	8.113943356	8.176091262	8.204119985	8.255272508	8.204119985	7.255272529	6.929418977	7.146128067	6.662757926	7.113943386	7.176091288	8.462397999	8.041392689	8.146128039	8.653212515	8.39794001	0	0	7.556302513	8.361727838	7.230448947	8.230448924	8.903089988
BUB3	0	0	0	0	0	0	0	0	0	0	0	0	0	0	0	0	0	0	0	0	0	0	0	0	0	0	0	0	0	0	0	0	0	0	0	0	0	0	0	0	0	0	0	0	0	0	6.903090041	8.690196081	8.778151251
CSDE1	0	0	0	0	0	0	0	0	0	0	0	0	0	0	0	0	0	0	0	0	0	0	0	0	0	0	0	0	0	0	0	0	0	0	6.6020601	0	0	7.892094608	0	0	0	0	0	0	0	0	0	7.886490731	7.623249301
GLRX3	0	0	0	0	0	0	6.812913423	7.20412001	7.146128067	6.113943686	0	0	0	0	7.113943386	7.079181282	6.230449177	7.041392725	7.230448947	0	0	0	0	0	0	7.763428001	6.913813905	7.146128067	7.079181282	6.939519303	7.041392725	7.342422701	6.556302621	6.897627146	7.672097867	0	0	0	7.968482953	0	0	8.000000004	0	0	7.079181282	8.041392689	7.568201736	8.342422683	8.518513941
SRP72	0	0	0	0	0	0	0	0	0	0	0	0	0	0	0	0	0	0	0	0	0	0	0	0	0	0	0	0	0	0	0	6.778151323	0	0	5.361729724	0	0	6.919078145	0	0	0	0	0	0	0	7.301030017	0	7.897627097	8.176091262
GART	0	0	0	0	0	0	7.146128067	6.968482995	7.079181282	6.845098102	6.977723651	0	0	6.65321261	6.99122612	6.954242558	6.361728025	6.886490782	6.9731279	0	6.568201841	6.698970091	7.447158047	6.176091549	6.204120254	7.812913363	0	7.785329842	7.518513953	7.505149992	7.278753624	7.568201736	6.662757926	6.505150114	7.568201736	0	6.544068168	7.740362697	0	7.799340556	0	0	0	0	6.6020601	8.431363766	7.53147893	8.491361695	8.672097859
SFPQ	0	0	0	0	0	0	0	0	0	0	0	0	0	0	0	0	0	0	0	0	0	0	6.113943686	6.146128346	6.431363925	7.079181282	0	7.230448947	7.748188035	7.908485024	7.880813598	6.85125841	0	0	6.568201841	0	0	8.41497335	0	8.041392689	7.43136378	0	0	0	0	0	0	8.50514998	8.929418926
RPL10	0	7.146128067	0	0	0	0	6.623249394	0	0	0	0	0	0	0	0	0	7.146128067	7.230448947	7.146128067	0	0	7.255272529	0	0	0	0	7.322219315	0	7.792391697	7.968482953	8.041392689	8.278753603	0	7.869231726	8.301029998	0	0	8.39794001	0	7.623249301	7.322219315	0	6.643452775	0	7.414973365	7.99122608	6.886490782	9.322219295	8.903089988
NMT1	0	0	0	0	0	0	0	0	0	0	0	0	0	0	0	0	0	0	0	0	0	0	0	0	0	0	6.806180042	7.146128067	0	0	0	0	0	5.8573331	0	0	0	7.690196089	0	0	7.176091288	7.568201736	0	0	0	0	0	8.72427587	9.176091259
RPL27A	6.79239176	6.86332292	6.819544001	0	0	0	0	0	0	0	0	0	0	0	0	0	7.301030017	7.414973365	7.301030017	7.113943386	7.041392725	6.99122612	7.322219315	7.301030017	6.949390055	7.863322866	7.755874863	7.763428001	8.07918125	8.176091262	8.146128039	8.041392689	0	7.462398013	7.505149992	7.255272529	7.146128067	8.07918125	0	7.518513953	8.146128039	0	6.903090041	0	7.623249301	8.204119985	7.518513953	9.176091259	8.86923172
ARCN1	0	0	0	0	0	0	6.230449177	0	6.27875383	6.462398148	0	0	0	0	0	0	0	0	0	0	0	0	0	0	0	7.041392725	6.897627146	7.079181282	6.903090041	0	0	7.568201736	6.531479045	6.477121399	7.176091288	6.079181608	0	7.968482953	0	0	0	0	0	0	0	8.230448924	0	8.301029998	8.690196081
HNRNPA3	0	0	0	0	0	6.845098102	0	0	0	0	0	0	0	0	0	0	0	0	0	0	0	0	0	0	0	7.230448947	7.568201736	7.591064618	7.963787832	7.819543942	7.959041397	7.322219315	7.079181282	7.518513953	7.505149992	0	0	8.544068046	0	0	0	0	0	0	0	8.041392689	0	9.113943353	9.079181246
SEC13	0	0	0	0	0	0	0	0	0	0	0	0	0	0	0	0	0	0	0	0	0	0	0	0	0	0	0	0	0	0	0	0	0	0	7.230448947	0	0	0	0	0	0	0	0	0	0	7.681241246	0	8.39794001	8.518513941
COPZ1	0	0	0	0	0	0	0	0	0	0	0	0	0	0	0	0	0	0	0	0	0	0	0	0	0	0	0	0	0	0	0	0	0	0	6.176091549	0	0	8.146128039	0	0	0	0	0	0	0	0	6.755874932	7.913813858	8.041392689
RPL30	0	0	0	0	0	0	0	0	0	0	0	0	0	0	6.447158186	0	6.301030213	7.397940026	7.113943386	0	0	0	7.20412001	7.146128067	6.949390055	7.041392725	0	0	7.602060002	7.748188035	7.113943386	7.653212523	0	7.079181282	7.113943386	6.477121399	7.230448947	8.72427587	0	0	7.477121269	0	7.20412001	0	7.322219315	7.944482677	7.361727855	9.041392686	8.939519253
SKP1	0	0	0	6.556302621	0	6.579783711	7.079181282	6.9731279	6.579783711	6.770852085	0	0	0	6.944482722	6.73239384	6.724275952	0	7.230448947	0	0	0	0	0	0	0	6.986771779	0	0	6.27875383	0	0	7.322219315	6.255272746	7.230448947	7.146128067	0	0	0	0	0	0	0	0	0	7.414973365	8.176091262	7.146128067	7.851258355	0
CSNK2B	0	0	0	0	0	0	0	0	0	0	0	0	0	0	0	0	0	0	0	0	0	0	0	0	0	0	0	0	0	0	0	7.623249301	7.146128067	0	7.146128067	7.477121269	0	0	0	0	0	0	0	0	7.113943386	8.07918125	7.255272529	8.959041393	7.491361708
RAE1	0	0	0	0	0	0	0	0	0	0	0	0	0	0	0	0	0	0	0	0	0	0	0	0	0	0	0	0	0	0	0	0	0	0	0	0	0	0	0	0	0	0	0	0	0	0	0	8.146128039	8.380211244
TRIM25	0	0	0	0	0	0	0	0	0	0	0	0	0	0	0	0	0	0	0	0	0	0	0	0	0	0	0	0	0	0	0	6.579783711	0	5.707571028	6.857332557	0	0	0	0	0	0	0	0	0	0	7.763428001	0	0	7.968482953
IFI16	0	0	0	0	0	0	0	0	0	0	0	0	0	0	0	0	0	0	6.477121399	0	0	0	0	0	0	0	0	0	0	0	0	0	0	0	0	0	0	0	0	0	0	0	0	0	0	0	0	8.380211244	7.770852019
PRPF8	0	0	0	0	0	0	0	0	0	0	6.431363925	6.380211423	0	0	0	0	0	0	0	0	0	0	0	0	0	0	0	0	0	0	0	0	0	0	0	0	0	8.041392689	0	7.255272529	0	0	0	0	6.505150114	0	7.591064618	8.41497335	8.07918125
LRRC47	0	6.949390055	6.869231778	0	0	0	0	0	0	0	0	0	0	0	0	0	0	0	0	0	0	0	0	0	0	0	0	0	0	0	0	0	0	0	0	0	0	7.146128067	0	0	0	0	0	0	0	7.301030017	6.857332557	0	8.342422683
SCFD1	0	0	0	0	0	0	0	0	0	0	0	0	0	6.431363925	6.491361834	0	0	0	0	0	0	0	0	0	0	7.146128067	7.255272529	0	0	0	0	0	0	0	0	0	0	7.690196089	0	7.278753624	0	7.591064618	0	0	0	0	0	7.869231726	8.230448924
MAGOHB	0	0	0	0	0	0	0	0	0	0	0	0	0	0	0	0	0	0	0	0	0	0	0	0	0	0	7.255272529	0	6.361728025	0	0	0	0	0	0	0	0	0	0	0	0	0	0	0	0	0	0	8.732393761	8.633468457
UGGT1	0	0	0	0	0	6.707570261	7.99122608	8.041392689	7.544068057	7.832508919	7.53147893	7.176091288	7.799340556	6.67209795	0	6.939519303	0	7.000000043	6.414973515	0	0	0	0	0	0	0	0	0	6.431363925	6.27875383	0	6.812913423	6.447158186	6.27875383	6.531479045	6.556302621	0	0	0	0	6.763428068	0	0	0	7.633468466	0	0	7.845098046	7.812913363
SRP68	0	0	0	0	0	0	0	6.322219502	0	0	0	0	6.591064718	0	0	0	0	0	7.113943386	0	0	0	0	0	0	0	0	0	0	0	0	0	0	0	0	0	0	7.681241246	0	7.255272529	0	0	0	0	0	8.146128039	0	8.041392689	8.07918125
SBDS	0	0	0	0	0	0	0	0	0	0	0	0	0	0	0	0	0	0	0	0	0	0	0	0	0	0	0	0	0	0	0	0	0	0	0	0	0	0	0	0	0	0	0	0	0	0	0	8.322219297	8.230448924
AP2M1	6.908485072	6.982271278	6.414973515	0	0	0	6.748188105	6.518514071	6.826074868	0	6.000000434	0	0	0	7.230448947	0	6.491361834	6.662757926	6.556302621	0	0	0	0	0	0	0	0	0	6.880813649	0	0	6.505150114	7.681241246	0	6.380211423	6.819544001	0	7.518513953	0	0	7.544068057	0	0	0	7.623249301	8.431363766	7.255272529	8.826074803	9
PFN2	0	0	0	0	0	0	0	0	0	0	0	0	0	0	0	0	7.301030017	0	7.20412001	0	0	7.146128067	0	0	0	7.361727855	7.041392725	8.041392689	7.322219315	7.568201736	0	8.255272508	7.278753624	7.278753624	0	0	0	7.505149992	0	0	0	0	0	0	7.447158047	8.612783858	7.477121269	8.643452677	8.785329836
RPL32	0	7.342422701	0	0	0	0	0	0	0	0	0	0	0	6.146128346	0	6.518514071	6.903090041	6.724275952	6.944482722	7.176091288	7.041392725	0	7.748188035	0	7.000000043	8.07918125	7.939519258	8.113943356	8.176091262	8.204119985	8.342422683	7.908485024	0	7.763428001	7.698970013	7.397940026	6.869231778	8.07918125	0	7.903089992	7.397940026	0	0	0	0	6.886490782	7.041392725	8.949390007	8.74036269
PGM3	0	0	0	0	0	0	0	0	0	0	0	0	0	0	0	0	0	0	0	0	0	0	0	0	0	7.414973365	6.707570261	7.278753624	6.612783963	0	0	6.67209795	0	0	6.230449177	6.176091549	6.869231778	7.544068057	7.770852019	0	7.255272529	7.838849097	0	0	6.86332292	8.204119985	7.000000043	7.342422701	7.913813858
OXSR1	0	0	0	0	0	0	0	7.079181282	0	6.27875383	0	0	0	0	7.146128067	0	6.748188105	7.672097867	7.361727855	0	7.113943386	0	0	0	0	7.778151258	8.041392689	0	0	0	0	7.322219315	0	0	0	0	0	7.732393768	0	7.672097867	0	7.838849097	6.707570261	0	7.000000043	8.176091262	7.414973365	7.973127858	7.929418931
PSAP	0	0	0	0	0	0	7.633468466	7.591064618	7.397940026	7.361727855	6.880813649	6.204120254	6.903090041	0	0	0	6.04139308	7.826074809	7.518513953	0	0	0	0	0	0	8.041392689	7.556302513	7.623249301	7.38021126	0	0	7.707570185	7.806179981	6.85125841	6.939519303	7.361727855	0	0	0	0	0	0	0	0	7.770852019	8.07918125	7.38021126	8.041392689	0
RPL7	6.431363925	6.447158186	6.447158186	0	0	0	0	0	7.000000043	0	7.146128067	6.724275952	6.954242558	0	0	0	7.591064618	7.556302513	7.556302513	7.079181282	6.924279338	6.857332557	7.255272529	7.230448947	6.748188105	7.568201736	7.414973365	7.716003352	8.301029998	7.959041397	8.07918125	8.278753603	7.397940026	7.672097867	7.792391697	6.65321261	7.491361708	8.748188028	0	8.342422683	8.146128039	7.819543942	7.301030017	0	7.806179981	8.230448924	7.633468466	9.301029996	9.176091259
RCC1	0	0	0	0	0	0	0	0	0	0	0	0	0	0	6.568201841	0	0	0	0	0	0	0	0	0	0	0	0	0	0	0	0	0	0	0	0	0	0	7.176091288	0	0	0	0	0	0	0	0	0	7.963787832	8.50514998
SRM	0	0	0	0	0	0	0	0	0	0	0	0	0	0	0	0	6.431363925	6.681241328	6.67209795	0	0	0	0	0	0	7.000000043	0	0	0	0	0	6.431363925	0	6.146128346	0	0	7.113943386	0	0	0	0	0	0	0	0	7.556302513	7.301030017	0	8.851258349
MCM3	0	0	0	0	0	0	0	0	0	0	0	0	0	0	0	0	0	0	0	0	0	0	0	0	0	0	0	0	0	0	0	0	0	0	0	0	0	8.176091262	0	0	0	0	0	0	6.462398148	0	6.73239384	8.531478918	7.99122608
RPL12	0	0	0	0	0	0	0	0	0	0	0	0	0	6.897627146	6.968482995	6.95904144	7.230448947	7.255272529	7.230448947	0	0	0	0	0	0	0	0	0	0	0	0	7.462398013	0	6.913813905	6.770852085	0	6.968482995	8.462397999	0	0	0	0	0	0	7.20412001	8.07918125	7.414973365	9.079181246	9.556302501
MAP2K2	0	0	0	0	0	0	0	0	0	0	0	0	0	0	0	0	6.342422878	6.27875383	0	0	0	0	0	0	0	8.39794001	7.322219315	8.301029998	0	0	0	7.414973365	0	7.43136378	7.20412001	0	0	0	0	0	0	7.812913363	0	0	5.908485555	7.763428001	7.041392725	8.146128039	8.591064608
HCFC1	0	0	0	0	0	0	0	0	0	0	0	0	0	0	0	0	0	0	0	0	0	0	0	0	0	0	0	0	0	0	0	0	0	0	0	0	0	0	0	0	0	0	0	0	0	0	0	7.505149992	7.785329842
UBE2M	0	0	0	0	0	0	0	0	0	0	0	0	0	0	0	6.380211423	0	0	0	0	0	0	5.929419437	0	0	7.079181282	0	6.954242558	0	0	0	0	0	7.53147893	7.518513953	0	0	0	0	7.623249301	7.755874863	0	0	0	7.301030017	8.230448924	7.662757841	8.041392689	8.643452677
RPL18A	0	0	6.301030213	0	0	0	0	6.662757926	0	0	6.934498502	6.897627146	6.86332292	0	0	0	7.000000043	7.20412001	7.041392725	0	0	6.65321261	7.041392725	0	0	7.755874863	7.785329842	7.832508919	7.863322866	7.913813858	7.924279291	7.838849097	7.20412001	0	7.361727855	7.477121269	7.491361708	8.39794001	0	7.623249301	7.944482677	7.146128067	0	0	7.602060002	8.07918125	7.301030017	9.176091259	8.832508913
MAP2K1	0	0	0	0	0	0	0	0	7.041392725	6.477121399	0	0	0	0	6.85125841	6.748188105	7.447158047	7.113943386	7.38021126	6.204120254	0	0	0	0	0	7.982271238	7.491361708	8.07918125	6.505150114	6.79239176	6.908485072	7.681241246	0	7.447158047	7.20412001	0	0	0	0	0	0	8.041392689	0	0	0	7.908485024	0	8.342422683	8.568201725
RBM39	0	0	0	0	0	0	0	0	0	0	0	0	0	6.491361834	6.65321261	0	0	0	0	0	0	0	0	0	0	0	0	0	0	0	0	0	0	0	0	0	0	0	0	0	0	0	0	0	0	0	0	8.041392689	0
PAFAH1B3	0	0	0	0	0	0	0	0	0	0	0	0	0	0	0	0	0	6.579783711	6.763428068	0	0	0	0	6.845098102	6.716003427	6.431363925	7.146128067	7.763428001	0	6.880813649	7.301030017	6.95904144	0	0	6.146128346	0	0	7.939519258	0	7.505149992	7.397940026	8.255272508	6.929418977	0	7.20412001	8.113943356	7.255272529	7.845098046	8.07918125
BOLA2	0	0	0	0	0	0	0	0	0	0	0	0	0	0	0	0	0	0	0	0	0	0	0	0	0	0	0	0	0	0	0	0	7.20412001	6.995635238	7.079181282	0	0	0	0	0	0	0	0	0	0	7.491361708	7.414973365	0	0
EIF4G1	0	0	0	6.65321261	0	0	6.949390055	0	6.491361834	6.785329906	0	0	0	6.748188105	6.113943686	0	6.612783963	6.755874932	6.95904144	0	0	0	0	0	0	6.908485072	6.9731279	7.342422701	7.041392725	0	6.431363925	7.342422701	5.95904187	7.477121269	7.146128067	0	6.643452775	8.041392689	7.724275878	7.505149992	7.20412001	7.477121269	0	0	7.113943386	8.000000004	7.176091288	8.342422683	8.204119985
P4HA2	0	0	0	0	0	0	0	0	0	0	0	0	0	0	0	0	0	0	0	0	0	0	0	0	0	0	0	0	0	0	0	0	0	0	0	0	0	0	0	0	0	7.322219315	0	0	0	0	0	8.176091262	0
AP1G1	0	0	0	0	0	0	6.230449177	6.380211423	6.397940182	0	0	0	0	0	0	0	0	0	0	0	0	0	0	0	0	6.785329906	7.342422701	6.963787875	6.230449177	6.591064718	0	6.778151323	0	0	5.90309053	0	0	0	7.342422701	0	0	7.633468466	6.690196169	0	7.301030017	7.880813598	6.763428068	8.041392689	7.973127858
SGTA	0	0	0	0	0	0	0	0	0	0	0	0	0	0	0	0	0	0	0	0	0	0	6.79239176	0	0	7.732393768	0	7.568201736	0	0	0	0	0	7.176091288	0	0	0	0	0	7.447158047	0	7.672097867	0	0	0	7.079181282	6.806180042	7.716003352	7.963787832
ACSL4	0	0	0	7.20412001	7.20412001	6.477121399	7.255272529	7.301030017	7.342422701	7.20412001	7.041392725	6.67209795	6.748188105	0	0	0	7.505149992	7.491361708	7.612783867	7.20412001	7.000000043	6.897627146	0	0	0	6.892094658	6.9731279	7.301030017	0	7.041392725	7.041392725	7.361727855	7.740362697	8.230448924	7.643452686	7.113943386	0	0	0	8.204119985	7.477121269	7.53147893	0	0	7.255272529	8.568201725	7.612783867	0	0
VPS4B	0	0	0	0	0	0	6.869231778	0	6.612783963	6.176091549	0	0	0	0	0	0	6.707570261	6.544068168	0	6.73239384	6.748188105	6.662757926	0	0	0	7.698970013	7.568201736	7.623249301	0	7.255272529	7.041392725	7.579783608	7.518513953	7.176091288	7.740362697	7.43136378	0	8.204119985	0	7.908485024	7.698970013	7.770852019	7.43136378	0	7.255272529	7.477121269	8.39794001	8.113943356	8.113943356
PSMD10	0	0	0	0	0	0	0	0	0	0	0	0	0	0	0	0	0	0	0	0	0	0	0	0	0	0	0	0	0	0	0	0	0	0	0	0	0	7.903089992	0	0	0	0	0	0	0	7.278753624	6.826074868	7.963787832	7.806179981
PAPSS2	0	0	0	0	6.079181608	0	0	0	0	0	0	0	0	0	0	0	0	0	0	0	0	0	0	0	0	0	0	0	0	0	0	0	0	0	0	0	0	7.477121269	0	7.230448947	0	0	0	0	0	0	0	7.944482677	8.322219297
ACSL3	0	0	0	0	0	0	7.079181282	6.995635238	7.301030017	7.000000043	7.342422701	7.079181282	7.556302513	0	0	0	6.255272746	6.698970091	6.361728025	0	0	0	0	0	0	0	0	7.505149992	0	0	0	6.86332292	7.929418931	7.623249301	6.342422878	7.255272529	0	0	0	0	0	0	0	0	7.301030017	8.176091262	0	0	0
AK1	0	0	0	0	0	0	0	0	0	0	0	0	0	0	0	0	6.579783711	6.67209795	6.6020601	0	0	0	6.518514071	0	0	7.556302513	7.43136378	6.832508977	7.146128067	0	0	0	0	6.397940182	0	0	0	0	0	7.397940026	0	7.602060002	6.740362768	0	7.462398013	8.113943356	0	8.39794001	8.491361695
P4HA1	0	0	0	0	0	0	7.278753624	7.255272529	7.20412001	6.908485072	7.38021126	6.556302621	6.690196169	0	0	0	6.85125841	6.763428068	6.662757926	0	7.556302513	7.278753624	0	0	0	7.361727855	6.612783963	7.812913363	0	0	0	7.755874863	0	7.785329842	0	0	0	0	7.633468466	7.732393768	0	7.892094608	0	0	6.633468557	0	6.591064718	8.113943356	7.43136378
CTPS1	0	0	0	0	0	0	0	0	0	0	0	0	0	0	0	0	6.591064718	6.518514071	0	0	0	0	0	0	0	7.176091288	0	7.361727855	0	0	0	0	0	0	7.301030017	0	0	8.000000004	0	0	0	0	0	0	6.903090041	7.897627097	6.785329906	7.929418931	8.602059992
OSBP	0	0	0	0	0	0	0	0	0	0	0	0	0	0	0	0	0	0	0	0	0	0	0	0	0	6.73239384	6.963787875	6.963787875	0	0	0	7.812913363	0	0	0	0	0	0	0	0	0	0	0	0	0	0	6.612783963	0	0
ITGA3	6.869231778	6.579783711	7.53147893	7.897627097	7.778151258	7.929418931	8.591064608	8.462397999	8.41497335	8.447158033	7.826074809	7.662757841	7.716003352	0	0	0	0	0	0	0	0	0	0	0	0	0	0	0	0	0	0	8.591064608	8.544068046	8.707570177	8.819543936	8.000000004	7.857332502	7.397940026	0	9.414973348	8.86923172	7.819543942	8.07918125	0	8.924279287	9.826074803	0	8.278753603	0
EPHA2	7.230448947	7.113943386	7.176091288	6.986771779	6.95904144	6.929418977	7.544068057	7.38021126	7.462398013	7.518513953	7.113943386	6.903090041	6.949390055	0	0	0	6.778151323	6.85125841	6.748188105	6.838849154	6.995635238	7.041392725	8.041392689	7.819543942	7.591064618	0	0	0	0	0	0	7.806179981	8.07918125	7.748188035	7.763428001	7.602060002	7.146128067	7.845098046	0	8.939519253	8.462397999	7.462398013	7.146128067	0	8.07918125	9.698970004	7.672097867	0	0
SHMT2	0	0	0	0	0	0	6.397940182	0	0	0	7.20412001	6.982271278	6.963787875	6.27875383	6.322219502	6.322219502	7.041392725	7.176091288	7.176091288	0	0	0	0	0	0	7.518513953	0	7.939519258	0	0	0	6.819544001	0	0	0	0	0	7.792391697	8.000000004	7.892094608	0	0	0	0	0	0	0	0	7.612783867
ARL3	0	0	0	0	0	0	0	0	6.301030213	0	0	0	0	0	0	0	7.079181282	6.934498502	6.531479045	0	0	0	0	0	0	0	7.113943386	7.38021126	0	7.38021126	0	7.041392725	0	0	6.255272746	0	0	8.041392689	0	0	0	7.851258355	0	0	0	7.662757841	7.342422701	8.07918125	8.342422683
RANBP1	0	0	0	0	0	0	0	0	0	0	0	0	0	0	0	0	0	6.799340618	6.812913423	6.892094658	0	0	0	0	0	7.602060002	0	0	0	0	7.863322866	7.544068057	0	7.707570185	6.505150114	0	0	8.342422683	0	0	7.959041397	7.698970013	0	0	0	8.431363766	8.176091262	7.838849097	8.230448924
SERPINH1	6.875061321	6.944482722	6.977723651	0	0	0	8.000000004	8.041392689	8.07918125	7.690196089	7.963787832	7.838849097	7.812913363	0	0	0	7.255272529	7.301030017	7.361727855	7.681241246	7.707570185	7.690196089	7.799340556	0	0	8.361727838	8.39794001	8.361727838	7.963787832	7.97772361	7.99122608	7.43136378	7.662757841	7.53147893	7.505149992	7.857332502	7.53147893	7.908485024	8.361727838	8.113943356	7.973127858	8.230448924	0	0	7.892094608	7.255272529	0	8.380211244	8.278753603
RPL27	0	0	0	0	0	0	6.380211423	0	0	0	0	0	0	0	0	0	6.826074868	6.698970091	6.716003427	0	0	0	7.113943386	7.146128067	0	7.113943386	0	7.477121269	7.146128067	7.672097867	7.770852019	7.301030017	6.662757926	7.176091288	7.230448947	0	7.000000043	8.342422683	0	0	7.662757841	0	0	0	0	8.000000004	7.43136378	8.763427994	8.732393761
SORD	0	0	0	6.623249394	0	7.113943386	0	0	0	0	7.301030017	0	7.230448947	7.38021126	7.255272529	7.255272529	0	0	7.079181282	0	0	0	0	0	0	7.643452686	0	7.672097867	0	0	0	7.176091288	0	0	6.204120254	0	0	0	0	0	0	8.301029998	0	0	0	7.939519258	7.278753624	7.819543942	7.778151258
HMGCS1	0	0	0	0	0	0	0	0	0	0	0	0	0	6.832508977	7.079181282	0	0	0	0	7.041392725	6.361728025	6.431363925	6.518514071	0	0	7.556302513	7.690196089	7.491361708	7.255272529	7.000000043	7.322219315	6.462398148	0	0	5.90309053	0	7.113943386	8.07918125	8.07918125	7.38021126	0	8.07918125	7.477121269	0	7.20412001	7.556302513	6.832508977	8.748188028	8.230448924
TAGLN	0	0	0	0	0	0	0	0	0	0	0	0	0	0	0	0	0	0	0	0	0	0	0	0	0	0	0	0	0	0	0	0	0	0	0	0	0	0	7.778151258	7.342422701	7.897627097	7.799340556	0	0	0	0	0	7.812913363	7.662757841
PLOD1	0	0	0	0	0	0	6.995635238	6.819544001	6.95904144	6.67209795	0	0	6.505150114	0	0	0	6.919078145	6.903090041	7.414973365	0	0	0	0	0	0	0	0	0	0	0	0	0	0	0	0	0	0	0	8.176091262	7.662757841	7.397940026	7.724275878	0	0	0	0	0	0	0
GBE1	0	0	0	0	0	0	0	0	0	0	0	0	0	0	0	0	0	0	0	0	0	0	0	0	0	0	0	7.851258355	0	0	0	0	0	0	0	0	0	0	0	0	0	7.716003352	0	0	0	7.944482677	0	7.079181282	0
GALNT2	0	0	0	0	0	0	7.97772361	7.934498456	7.99122608	7.653212523	6.924279338	6.591064718	7.000000043	0	0	0	0	0	0	0	0	0	0	0	0	7.322219315	0	7.361727855	6.230449177	0	0	0	6.643452775	0	6.724275952	0	6.73239384	0	0	0	0	7.740362697	6.380211423	0	7.863322866	0	0	7.38021126	0
UBE2V1	0	0	6.857332557	0	0	0	6.681241328	6.707570261	6.707570261	6.477121399	0	0	0	0	0	0	0	6.812913423	6.361728025	0	0	0	0	0	0	0	0	7.278753624	0	0	0	0	0	6.892094658	6.301030213	0	0	0	0	0	0	7.491361708	0	0	7.000000043	8.278753603	7.832508919	8.113943356	8.301029998
SNX1	0	0	0	0	0	0	0	0	0	5.690196966	0	0	0	0	0	0	0	0	6.447158186	0	0	0	7.447158047	0	7.20412001	8.041392689	7.342422701	0	0	0	7.079181282	0	0	0	0	0	0	0	0	0	7.113943386	8.322219297	6.886490782	0	6.681241328	0	7.414973365	8.431363766	8.041392689
CUL4A	0	0	0	0	0	0	6.556302621	0	6.04139308	0	0	0	0	0	0	0	0	0	0	0	0	0	0	0	0	7.146128067	6.963787875	6.934498502	0	0	0	7.414973365	0	0	0	0	0	7.20412001	7.43136378	0	0	7.176091288	0	0	0	7.322219315	6.579783711	0	7.897627097
SEC23B	0	0	0	0	0	0	0	0	0	0	0	0	0	0	0	0	0	0	0	6.113943686	6.04139308	0	0	0	0	7.857332502	7.255272529	7.146128067	6.591064718	0	0	6.447158186	0	0	6.04139308	0	0	0	0	0	6.857332557	8.230448924	0	0	0	7.38021126	0	8.255272508	0
UAP1	0	0	0	0	0	0	0	0	0	0	0	0	0	0	0	0	0	0	0	6.892094658	5.968483416	0	7.113943386	0	0	7.740362697	7.414973365	7.591064618	6.857332557	0	0	0	0	6.079181608	6.255272746	0	0	0	6.892094658	7.716003352	0	7.939519258	0	0	6.9731279	0	6.755874932	8.342422683	8.633468457
CDC37	0	0	0	0	0	0	0	0	6.079181608	0	5.698970873	0	0	0	0	0	0	7.301030017	6.633468557	0	0	0	0	0	0	0	0	0	0	0	0	6.897627146	7.20412001	7.544068057	7.518513953	0	0	0	0	0	0	0	0	0	0	7.146128067	7.20412001	0	0
ACAT2	0	0	0	0	0	0	0	0	0	0	0	0	0	0	0	0	6.447158186	0	0	0	0	0	0	0	0	0	0	0	0	0	0	0	0	0	0	0	0	7.491361708	7.544068057	7.716003352	0	7.491361708	0	0	7.462398013	0	6.361728025	8.690196081	8.72427587
GLOD4	0	0	0	0	0	0	0	0	0	0	0	0	0	0	0	0	0	0	0	7.505149992	7.414973365	7.397940026	7.863322866	7.544068057	7.361727855	8.230448924	8.255272508	8.255272508	7.414973365	7.724275878	7.806179981	7.414973365	6.755874932	7.397940026	6.875061321	7.38021126	7.462398013	8.041392689	8.204119985	8.204119985	7.633468466	8.50514998	7.544068057	0	0	0	7.672097867	0	8.146128039
MAT2B	0	0	0	0	0	0	0	0	0	0	0	0	0	0	0	0	0	0	0	0	0	0	0	0	0	7.255272529	6.579783711	7.342422701	6.518514071	0	0	6.361728025	0	0	0	0	0	0	0	0	0	0	0	0	0	0	0	8.07918125	8.204119985
CHORDC1	0	0	0	0	0	0	0	0	0	0	0	0	0	0	0	0	0	0	0	0	0	0	0	0	0	0	7.146128067	0	0	0	0	7.079181282	6.681241328	0	6.690196169	0	0	0	0	0	0	0	0	0	0	7.579783608	0	7.505149992	8.204119985
CARHSP1	0	0	0	0	0	0	0	0	0	0	0	0	0	0	6.431363925	0	6.857332557	6.869231778	0	7.38021126	7.230448947	0	7.544068057	7.579783608	7.113943386	7.079181282	7.681241246	7.462398013	7.785329842	7.447158047	0	0	0	0	6.204120254	0	7.146128067	0	0	7.929418931	0	0	7.447158047	0	7.556302513	7.954242514	7.672097867	8.662757833	8.643452677
DYNC1LI1	0	0	0	0	0	0	0	0	0	0	0	0	0	0	0	0	0	0	0	0	0	0	0	0	0	7.792391697	7.278753624	7.591064618	6.986771779	0	6.924279338	6.740362768	6.591064718	6.939519303	7.079181282	6.95904144	0	7.954242514	0	7.579783608	0	7.518513953	7.544068057	0	7.176091288	7.491361708	6.612783963	8.462397999	8.698970005
AGRN	7.851258355	7.863322866	7.857332502	0	0	0	7.505149992	7.505149992	7.414973365	7.342422701	6.230449177	0	0	6.431363925	6.505150114	6.505150114	0	0	0	0	0	0	0	0	0	0	0	0	0	0	0	8.07918125	7.38021126	7.505149992	8.000000004	7.255272529	0	8.39794001	0	7.838849097	7.301030017	7.361727855	0	0	7.732393768	7.819543942	6.397940182	0	7.342422701
CAV1	0	0	0	0	0	0	0	0	0	0	0	0	0	0	0	0	0	0	0	0	0	0	0	0	6.342422878	0	0	0	0	0	0	0	0	0	8.07918125	0	0	0	0	0	0	0	0	0	8.278753603	0	0	0	0
ERLIN2	0	0	0	0	0	0	7.662757841	7.716003352	7.681241246	7.414973365	8.041392689	7.342422701	7.968482953	0	0	0	0	0	0	0	0	0	0	0	0	0	0	0	0	0	0	0	7.278753624	0	0	0	0	0	0	0	0	0	0	0	6.819544001	0	0	0	0
CYB5R3	0	0	0	0	0	0	7.255272529	7.146128067	7.278753624	7.113943386	7.716003352	7.579783608	7.53147893	0	0	0	6.806180042	6.832508977	6.954242558	0	0	0	0	0	0	0	6.707570261	0	0	0	0	0	0	0	0	0	0	0	0	7.53147893	6.785329906	0	0	0	0	0	0	7.944482677	8.322219297
COX4I1	0	0	0	0	0	0	0	0	0	0	6.612783963	6.04139308	0	0	0	0	6.255272746	6.579783711	6.255272746	0	0	0	0	0	0	0	0	0	0	0	0	0	0	0	0	0	0	0	0	0	0	0	0	0	0	0	0	0	0
PDIA4	0	0	0	0	0	0	8.380211244	8.380211244	8.39794001	8.07918125	7.875061269	8.000000004	8.000000004	0	6.799340618	0	6.568201841	6.85125841	6.73239384	0	0	0	0	0	0	0	0	0	0	0	0	7.838849097	7.903089992	7.908485024	0	7.897627097	0	0	0	0	0	0	0	0	7.832508919	0	0	0	0
PRKCSH	0	0	0	0	0	0	7.908485024	7.903089992	7.929418931	7.698970013	7.806179981	7.477121269	7.740362697	0	0	0	6.755874932	6.939519303	0	0	0	0	0	0	0	0	0	0	0	0	0	7.579783608	7.770852019	7.397940026	6.857332557	7.43136378	0	0	0	0	0	0	0	0	7.770852019	0	7.301030017	0	0
LMAN2	0	0	0	0	0	0	7.944482677	8.361727838	8.255272508	7.778151258	8.146128039	7.939519258	7.724275878	0	0	0	0	0	0	0	0	0	0	0	0	0	7.602060002	0	0	0	0	7.113943386	7.740362697	7.176091288	7.342422701	7.43136378	0	0	0	0	0	0	0	0	7.740362697	0	0	8.204119985	0
DDOST	0	0	0	0	0	0	8.380211244	8.342422683	8.230448924	8.204119985	8.462397999	8.361727838	8.380211244	0	0	0	6.99122612	6.838849154	7.041392725	0	0	0	0	0	0	6.556302621	0	0	0	0	0	7.568201736	7.278753624	6.681241328	6.255272746	7.000000043	0	0	0	0	0	0	0	0	7.623249301	0	0	0	0
HYOU1	0	0	0	0	7.176091288	0	8.000000004	8.380211244	8.361727838	7.857332502	7.623249301	7.53147893	7.505149992	7.414973365	0	7.414973365	0	0	0	0	0	0	0	0	0	0	0	0	0	0	0	7.886490731	6.748188105	0	6.963787875	6.681241328	0	7.414973365	0	0	7.462398013	0	0	0	7.53147893	0	0	0	7.939519258
SLC25A3	0	0	0	0	7.38021126	0	7.38021126	0	6.79239176	0	6.963787875	7.414973365	6.86332292	0	0	0	6.9731279	6.477121399	6.944482722	0	0	0	0	0	0	0	0	0	0	0	0	7.301030017	7.518513953	0	6.662757926	0	0	0	0	0	7.230448947	0	0	0	7.755874863	0	6.447158186	0	0
AK2	0	0	0	0	0	0	0	0	0	0	0	6.397940182	6.875061321	0	0	0	7.255272529	7.079181282	6.919078145	0	0	0	0	0	0	0	0	0	0	0	0	0	0	0	0	0	0	0	0	0	0	0	0	0	0	0	6.414973515	0	0
SDHA	0	0	0	0	0	0	0	0	6.707570261	0	7.000000043	7.079181282	7.230448947	6.544068168	6.477121399	0	7.851258355	7.982271238	7.968482953	0	0	0	0	0	0	0	0	0	0	0	0	6.826074868	0	5.963788299	6.146128346	6.556302621	0	0	0	0	7.000000043	0	0	0	7.397940026	0	6.875061321	7.845098046	8.204119985
KPNA4	0	0	0	0	0	0	0	0	0	0	0	0	0	0	0	0	0	0	0	0	0	0	0	0	0	6.662757926	0	0	0	0	0	6.903090041	6.431363925	6.755874932	7.176091288	6.662757926	0	7.079181282	0	0	6.986771779	0	0	0	0	7.623249301	7.113943386	8.07918125	7.908485024
SEC22B	0	0	0	0	0	0	0	0	0	0	0	0	0	0	0	0	0	0	0	0	0	0	0	0	0	0	0	0	0	0	0	7.342422701	0	0	0	0	0	0	0	0	0	0	0	0	0	0	0	0	0
CYC1	0	0	0	0	0	0	0	0	0	0	6.568201841	6.431363925	6.491361834	0	0	0	7.113943386	6.913813905	7.079181282	0	0	0	0	0	0	0	0	0	0	0	0	0	0	0	0	0	0	0	0	0	0	0	0	0	0	0	0	0	0
COX5B	0	0	0	0	0	0	0	0	0	0	0	0	0	0	0	0	6.857332557	6.939519303	6.995635238	0	0	0	0	0	0	0	0	0	0	0	0	0	0	0	0	0	0	0	0	0	0	0	0	0	0	0	0	0	0
COX6B1	0	0	0	0	0	0	0	0	0	0	0	0	0	0	0	0	6.763428068	6.954242558	7.041392725	0	0	0	0	0	0	0	0	0	0	0	0	0	0	0	0	0	0	0	0	0	0	0	0	0	0	0	0	0	0
SDHB	0	0	0	0	0	0	0	0	0	0	0	0	0	0	0	0	7.146128067	0	7.255272529	0	0	0	0	0	0	0	0	0	0	0	0	0	0	0	0	0	0	0	0	0	0	0	0	0	0	0	0	0	0
SCP2	0	0	0	0	0	0	7.079181282	7.176091288	7.176091288	6.612783963	7.230448947	6.954242558	6.934498502	0	0	0	6.591064718	6.662757926	0	0	0	0	0	0	0	0	0	0	0	0	0	6.99122612	6.447158186	0	0	0	0	0	0	0	0	0	0	0	7.278753624	0	0	7.462398013	0
ACAT1	0	0	0	0	0	0	0	0	0	0	0	0	0	0	0	0	7.255272529	7.38021126	7.518513953	0	0	0	0	0	0	0	0	0	0	0	0	6.431363925	0	0	0	0	0	0	0	0	0	0	0	0	6.963787875	0	0	0	7.838849097
PRDX3	0	0	0	0	0	0	6.113943686	6.785329906	6.913813905	6.826074868	7.079181282	6.908485072	6.939519303	0	0	0	7.698970013	7.414973365	7.361727855	0	0	0	0	0	0	0	0	0	0	0	0	7.38021126	6.322219502	0	0	0	0	0	0	0	0	0	0	0	7.38021126	0	6.95904144	0	0
UQCRC1	0	0	0	0	0	0	0	0	0	0	7.041392725	0	6.939519303	0	0	0	7.079181282	6.86332292	7.146128067	0	0	0	0	0	0	0	0	0	0	0	0	0	0	0	0	0	0	0	0	0	0	0	0	0	6.963787875	0	0	0	0
SERPINB6	0	0	0	0	0	0	6.698970091	6.755874932	0	0	0	6.591064718	6.579783711	0	0	0	7.113943386	0	7.146128067	0	0	0	0	0	0	0	0	0	0	0	0	7.278753624	6.431363925	7.322219315	7.20412001	6.27875383	0	0	0	0	0	0	0	0	0	7.903089992	0	0	8.361727838
HADHA	0	0	0	0	0	0	0	0	6.681241328	0	7.146128067	7.000000043	6.919078145	0	0	0	7.322219315	7.146128067	7.462398013	0	0	0	0	0	0	0	0	0	0	0	0	0	0	0	0	0	0	0	0	0	0	0	0	0	0	0	6.643452775	0	0
RPL29	0	0	0	0	0	0	0	0	0	0	0	0	0	0	0	0	0	0	0	0	0	0	0	0	7.505149992	8.113943356	0	8.041392689	8.50514998	8.447158033	8.39794001	8.204119985	0	8.146128039	8.07918125	0	0	0	0	0	0	0	0	0	0	0	0	8.146128039	0
PXN	6.477121399	0	6.778151323	0	0	0	0	0	0	0	0	0	0	0	0	0	0	0	0	0	0	0	0	0	0	0	0	0	0	0	0	0	6.869231778	7.20412001	6.462398148	0	0	0	0	7.20412001	0	0	0	0	7.113943386	7.698970013	0	0	0
LMAN1	0	0	0	0	0	0	7.939519258	7.968482953	8.000000004	7.681241246	7.851258355	7.278753624	7.568201736	0	0	0	0	0	0	0	0	0	0	0	0	0	0	0	0	0	0	0	0	0	0	0	0	0	0	0	0	0	0	0	7.819543942	0	0	0	0
ACADVL	0	0	0	0	0	0	0	0	0	0	6.892094658	6.819544001	6.568201841	0	0	0	7.397940026	7.301030017	7.301030017	0	0	0	0	0	0	0	0	0	0	0	0	0	0	0	0	0	0	0	0	0	0	0	0	0	0	0	0	0	8.176091262
BCAP31	0	0	0	0	0	0	0	0	6.414973515	0	6.95904144	6.995635238	6.986771779	0	0	0	0	0	0	0	0	0	0	0	0	0	0	0	0	0	0	0	7.973127858	0	0	7.579783608	0	0	0	0	0	0	0	0	0	0	0	0	0
RPS13	0	0	0	0	0	0	6.690196169	6.477121399	6.623249394	6.633468557	0	0	0	6.778151323	6.819544001	6.707570261	7.176091288	7.301030017	7.176091288	0	0	0	6.913813905	0	0	7.53147893	0	0	7.518513953	0	0	6.903090041	0	0	7.20412001	0	7.255272529	8.612783858	0	7.845098046	7.724275878	0	0	0	7.43136378	8.07918125	7.568201736	8.342422683	8.986771735
RPS25	6.643452775	6.785329906	0	0	0	0	6.518514071	6.579783711	6.579783711	7.079181282	0	0	0	0	0	0	6.681241328	6.832508977	6.707570261	0	0	0	7.732393768	7.505149992	7.447158047	7.361727855	7.361727855	7.556302513	8.000000004	7.934498456	7.973127858	0	0	6.778151323	7.20412001	0	0	8.50514998	0	0	7.934498456	0	0	0	7.477121269	8.146128039	7.568201736	8.462397999	9
SLC25A11	0	0	0	0	0	0	0	0	0	0	6.755874932	6.643452775	0	0	0	0	7.000000043	6.995635238	6.85125841	0	0	0	0	0	0	0	0	0	0	0	0	0	0	0	0	0	0	0	0	0	0	0	0	0	0	0	0	0	0
FLII	0	0	0	0	0	0	0	0	0	0	0	0	0	0	0	0	0	0	0	0	0	0	0	0	0	0	0	0	0	0	0	0	0	0	0	0	0	0	0	0	0	6.832508977	0	0	6.681241328	7.361727855	7.230448947	7.544068057	7.934498456
TMED2	0	0	0	0	0	0	8.361727838	8.431363766	8.322219297	8.07918125	8.342422683	7.342422701	8.255272508	6.778151323	6.875061321	6.770852085	7.278753624	7.20412001	7.041392725	0	0	0	0	0	0	0	0	0	0	0	0	0	0	0	0	0	0	0	0	0	0	0	0	0	7.857332502	0	0	0	0
HSD17B12	0	0	0	0	0	0	7.477121269	7.414973365	7.361727855	7.278753624	8.230448924	8.07918125	8.113943356	0	0	0	7.079181282	7.20412001	7.176091288	0	0	0	0	0	0	0	0	0	0	0	0	7.255272529	7.633468466	0	6.924279338	7.342422701	0	0	0	0	0	0	0	0	7.477121269	0	0	0	0
TXNDC5	0	0	0	0	0	0	8.07918125	8.07918125	7.851258355	7.903089992	7.491361708	7.53147893	7.113943386	0	0	0	7.113943386	7.20412001	6.897627146	0	0	0	0	0	0	0	0	0	0	0	0	7.919078098	7.322219315	0	6.342422878	6.322219502	0	0	0	0	0	0	0	0	7.623249301	0	7.079181282	0	0
NDRG1	0	0	0	0	0	0	0	0	0	0	0	0	0	7.579783608	0	6.544068168	7.079181282	7.113943386	7.146128067	0	0	0	0	0	0	7.342422701	0	0	0	0	0	0	6.230449177	5.90309053	5.806180653	0	0	0	0	8.230448924	7.414973365	0	0	0	0	8.431363766	0	10.11394335	9.322219295
TECR	0	0	0	0	0	0	6.724275952	6.903090041	6.875061321	6.913813905	7.176091288	7.041392725	7.301030017	0	0	0	0	0	0	0	0	0	0	0	0	0	0	0	0	0	0	0	7.579783608	0	0	0	0	0	0	0	0	0	0	0	0	0	0	0	0
DNAJB11	0	0	0	0	0	0	7.447158047	7.38021126	7.653212523	7.301030017	7.255272529	6.826074868	7.518513953	0	0	0	0	0	0	0	0	0	0	0	0	0	0	0	0	0	0	6.857332557	0	0	0	0	0	0	0	0	0	0	0	0	0	0	0	7.826074809	0
CNPY2	0	0	0	0	0	0	8.041392689	8.041392689	8.000000004	7.477121269	7.819543942	7.707570185	7.43136378	0	0	6.763428068	6.322219502	7.176091288	7.041392725	0	0	0	0	0	0	0	0	0	0	0	0	6.748188105	0	0	0	0	0	0	0	0	0	0	0	0	7.255272529	0	0	0	0
TOR1AIP1	0	0	0	0	0	0	6.995635238	7.146128067	7.041392725	6.929418977	0	0	6.146128346	0	0	0	0	0	0	0	0	0	0	0	0	0	0	0	0	0	0	0	0	0	0	0	0	0	0	0	0	0	0	0	0	0	0	0	0
RPL24	0	6.447158186	6.27875383	0	0	0	6.431363925	0	6.505150114	0	0	0	0	0	0	0	0	6.690196169	7.041392725	0	0	0	0	0	0	0	7.255272529	7.447158047	7.690196089	7.724275878	7.53147893	7.662757841	0	6.556302621	7.342422701	5.886491289	6.963787875	8.000000004	0	7.653212523	7.832508919	0	6.740362768	0	7.698970013	7.301030017	7.361727855	9.041392686	8.86923172
YKT6	0	0	0	0	0	0	0	6.505150114	6.491361834	0	0	0	0	0	0	0	0	0	0	0	0	0	0	0	0	0	0	0	0	0	0	7.322219315	7.255272529	6.954242558	6.939519303	6.623249394	0	0	0	0	0	0	0	0	7.301030017	8.146128039	7.643452686	0	0
ECHS1	0	0	0	0	0	0	6.716003427	6.568201841	6.431363925	6.301030213	6.505150114	6.431363925	6.612783963	0	0	0	6.806180042	6.924279338	6.755874932	0	0	0	0	0	0	0	0	0	0	0	0	7.230448947	0	0	5.886491289	0	0	0	0	0	0	0	0	0	6.73239384	0	0	0	8.041392689
STT3A	0	0	0	0	0	0	7.982271238	7.973127858	7.903089992	7.414973365	7.707570185	7.146128067	7.556302513	0	0	0	6.897627146	0	6.919078145	0	0	0	0	0	0	0	0	0	0	0	0	7.113943386	6.778151323	0	0	0	0	0	0	0	0	0	0	0	7.113943386	0	0	0	0
TUFM	0	0	0	0	0	0	6.643452775	6.785329906	6.414973515	0	7.146128067	7.146128067	6.99122612	0	0	0	7.20412001	7.414973365	7.301030017	0	0	0	0	0	0	0	0	0	0	0	0	7.623249301	7.041392725	7.477121269	7.255272529	7.301030017	0	0	0	0	0	0	0	0	7.38021126	0	0	0	0
SSR4	0	0	0	0	0	0	7.845098046	7.681241246	7.707570185	7.579783608	7.518513953	7.662757841	7.724275878	0	0	0	0	0	0	0	0	0	0	0	0	0	0	0	0	0	0	7.698970013	7.477121269	0	0	7.20412001	0	0	0	0	0	0	0	0	0	0	0	0	0
ASPH	0	0	0	0	0	0	8.662757833	8.672097859	8.633468457	8.322219297	8.518513941	8.41497335	8.39794001	0	0	0	0	0	0	0	0	0	0	0	0	0	0	0	0	0	0	6.707570261	8.113943356	0	0	0	0	0	0	0	0	0	0	0	8.000000004	0	0	0	0
PICALM	0	0	0	0	0	0	0	0	6.544068168	6.633468557	0	0	0	0	0	0	6.491361834	6.000000434	6.643452775	0	0	0	0	0	0	6.748188105	0	0	0	0	0	0	0	5.643453664	6.079181608	0	0	0	0	0	7.301030017	0	0	0	7.230448947	8.204119985	7.477121269	7.462398013	0
TSN	0	0	0	0	7.176091288	0	0	7.755874863	6.301030213	0	6.806180042	6.301030213	5.95904187	0	0	0	6.079181608	7.230448947	7.079181282	0	0	0	0	0	0	0	0	0	0	0	0	7.505149992	6.770852085	0	7.43136378	0	0	7.38021126	0	0	7.414973365	0	0	0	7.763428001	0	7.113943386	0	0
HADH	0	0	0	0	0	0	0	0	0	0	0	0	0	0	0	0	6.875061321	6.799340618	7.079181282	0	0	0	0	0	0	0	0	0	0	0	0	0	0	0	6.633468557	0	0	0	0	0	0	0	0	0	0	0	0	8.361727838	7.799340556
SLC25A24	0	0	0	0	0	0	0	0	0	0	0	0	0	0	0	0	0	0	0	0	0	0	0	0	0	0	0	0	0	0	0	0	0	0	0	0	0	0	0	0	0	0	0	0	7.079181282	0	0	0	0
LPP	0	0	0	0	0	0	0	0	0	0	0	0	0	0	0	0	0	7.20412001	0	0	0	0	0	0	0	0	0	0	0	0	0	6.662757926	0	0	6.113943686	0	6.826074868	0	0	0	7.863322866	0	0	0	0	8.113943356	0	7.612783867	0
SAR1A	0	0	0	0	0	0	0	0	6.707570261	6.832508977	0	0	0	0	0	0	0	0	0	0	0	0	7.176091288	0	0	0	7.806179981	7.698970013	7.414973365	0	0	7.113943386	0	6.785329906	7.041392725	0	0	0	7.770852019	7.880813598	7.000000043	0	7.301030017	0	7.698970013	0	7.43136378	8.278753603	7.477121269
MYOF	7.176091288	7.255272529	7.041392725	7.146128067	7.113943386	7.176091288	8.113943356	8.531478918	8.255272508	8.301029998	8.113943356	8.07918125	8.07918125	6.799340618	6.633468557	6.778151323	7.000000043	6.919078145	6.929418977	7.041392725	7.113943386	6.04139308	0	0	0	0	0	0	0	0	0	8.491361695	8.361727838	8.113943356	8.176091262	8.301029998	0	0	0	8.342422683	7.633468466	0	6.869231778	0	8.176091262	7.662757841	0	7.518513953	0
VAPA	0	0	0	0	0	0	0	0	0	0	0	0	0	0	0	0	0	0	0	6.531479045	0	0	0	0	0	0	0	0	0	0	0	7.612783867	0	0	0	0	0	0	0	0	0	0	0	0	0	0	6.819544001	7.53147893	0
NSFL1C	0	0	0	0	0	0	0	0	0	0	0	0	0	0	0	0	0	0	0	0	0	0	0	0	0	0	0	0	0	0	0	0	7.041392725	7.447158047	0	0	0	0	0	0	0	0	0	0	0	0	0	0	0
MTCH2	0	0	0	0	0	0	0	0	0	0	6.95904144	6.447158186	6.698970091	0	0	0	6.65321261	6.462398148	6.806180042	0	0	0	0	0	0	0	0	0	0	0	0	0	0	0	0	0	0	0	0	0	0	0	0	0	0	0	0	0	0
COX5A	0	0	0	0	0	0	0	0	0	0	0	6.505150114	6.785329906	0	0	0	7.146128067	6.698970091	7.000000043	0	0	0	0	0	0	0	0	0	0	0	0	7.041392725	0	0	0	0	0	0	0	0	0	0	0	0	7.255272529	0	0	0	0
GSTK1	0	0	0	0	0	0	6.778151323	6.724275952	6.643452775	0	7.397940026	7.301030017	7.301030017	0	0	0	0	0	0	0	0	0	0	0	0	0	0	0	0	0	0	0	0	0	0	0	0	0	0	0	0	0	0	0	0	0	0	0	0
FXR1	0	0	0	0	0	0	0	0	0	0	0	0	0	0	0	0	6.518514071	0	0	0	0	0	0	0	0	0	0	0	0	0	0	0	0	0	0	0	0	0	0	0	0	0	0	0	6.86332292	0	0	8.146128039	7.477121269
POLR2B	0	0	0	0	0	0	0	0	0	0	0	0	0	0	0	0	0	0	0	0	0	0	0	0	0	0	0	0	0	0	0	0	0	0	0	0	0	0	0	0	0	0	0	0	0	0	0	7.919078098	8.07918125
ZC3HAV1	0	0	0	0	0	0	0	6.113943686	0	0	0	0	0	0	0	0	0	0	6.531479045	0	0	0	0	0	0	0	0	0	0	0	0	6.6020601	6.897627146	0	7.892094608	0	0	0	0	0	0	0	0	0	6.662757926	7.892094608	7.000000043	0	0
PPA2	0	0	0	0	0	0	0	0	0	0	0	0	0	0	0	0	6.397940182	0	0	0	0	0	0	0	0	6.934498502	0	7.230448947	0	0	0	7.146128067	6.414973515	0	0	0	0	0	0	0	0	0	0	0	0	0	0	8.146128039	8.278753603
CAST	0	0	0	0	0	0	0	0	0	0	0	0	0	0	0	0	0	0	0	0	0	0	0	0	0	0	0	0	0	0	0	0	0	0	0	0	0	0	0	0	0	0	0	0	0	0	6.908485072	0	0
SMC4	0	0	0	0	0	0	0	0	0	0	0	0	0	0	0	0	0	0	0	0	0	0	0	0	0	0	0	0	0	0	0	0	0	0	0	0	0	7.732393768	0	6.869231778	0	0	0	0	0	0	0	0	7.113943386
RPL31	0	0	0	0	0	0	0	0	0	0	0	0	0	0	0	0	7.53147893	0	7.477121269	0	0	0	6.79239176	0	0	0	0	0	0	0	0	0	0	0	0	0	0	7.146128067	0	0	0	0	0	0	7.255272529	0	0	8.342422683	8.491361695
RPL19	0	0	0	0	0	0	0	0	0	0	0	0	0	0	0	0	0	6.785329906	6.65321261	0	0	0	0	0	0	0	0	0	7.591064618	7.342422701	8.612783858	7.662757841	0	7.000000043	7.301030017	0	0	7.812913363	0	8.812913357	7.812913363	0	0	0	7.43136378	7.732393768	7.462398013	8.579783598	7.908485024
LONP1	0	0	0	0	0	0	0	0	0	0	0	0	0	0	0	0	7.113943386	7.079181282	7.113943386	0	0	0	0	0	0	0	0	0	0	0	0	0	0	0	0	0	0	0	0	0	0	0	0	0	0	0	0	0	0
IGF2BP3	0	0	0	0	0	0	0	0	0	0	0	0	0	0	0	0	0	0	0	0	0	0	0	0	0	6.681241328	0	0	0	0	6.755874932	0	0	0	0	0	0	0	0	0	0	0	0	0	6.505150114	0	6.954242558	7.53147893	0
AP3D1	0	0	0	0	0	0	0	0	0	0	0	0	0	0	0	0	0	0	0	0	0	0	0	0	0	0	0	0	0	0	0	0	0	0	0	0	0	0	0	0	0	0	0	0	0	0	0	7.690196089	7.740362697
PDCD5	0	0	0	0	0	0	0	0	0	0	0	0	0	0	0	0	6.623249394	6.633468557	6.6020601	0	0	0	0	0	0	0	0	0	0	0	0	0	0	0	0	0	0	0	0	0	0	0	0	0	0	7.919078098	7.397940026	0	0
SCAMP3	0	0	0	0	0	0	0	0	0	0	0	0	0	0	0	0	0	0	0	0	0	0	0	0	0	7.959041397	7.832508919	7.863322866	0	0	0	7.643452686	7.176091288	6.806180042	0	6.857332557	0	0	0	0	0	0	0	0	0	0	8.000000004	7.643452686	0
U2SURP	0	0	0	0	0	0	0	0	0	0	0	0	0	0	0	0	0	0	0	0	0	0	0	0	0	0	0	0	0	0	0	0	0	0	0	0	0	0	0	0	0	0	0	0	0	0	0	8.278753603	8.39794001
DYNC1LI2	0	0	0	0	0	0	0	0	0	0	0	0	0	0	0	0	0	0	0	0	0	0	0	0	0	0	0	0	0	0	0	0	0	6.740362768	7.146128067	0	0	7.397940026	0	0	0	0	0	0	0	7.785329842	6.662757926	7.716003352	7.968482953
TPD52L2	0	0	0	0	0	0	0	6.431363925	6.544068168	0	0	0	0	0	0	0	0	0	0	0	0	0	0	0	0	0	0	0	0	0	0	7.544068057	7.079181282	6.897627146	6.897627146	0	0	0	0	7.799340556	0	0	0	0	6.924279338	7.924279291	7.518513953	7.740362697	0
PLOD3	0	0	0	0	0	0	6.681241328	7.146128067	6.342422878	6.176091549	7.53147893	7.255272529	7.38021126	0	0	0	0	6.662757926	0	0	0	0	0	0	0	0	0	0	0	0	0	0	0	0	0	0	0	0	0	0	0	0	0	0	0	0	6.591064718	0	0
EIF3G	0	0	0	0	0	0	0	0	0	0	0	0	0	0	0	0	0	0	0	0	0	0	0	0	0	0	0	0	0	0	0	0	0	0	0	0	0	0	0	0	0	0	0	0	0	0	6.869231778	7.832508919	0
PRPF6	0	0	0	0	0	0	0	0	0	0	0	0	0	0	0	0	0	0	0	0	0	0	0	0	0	0	0	0	0	0	0	6.462398148	0	0	0	0	0	7.556302513	0	0	0	0	0	0	0	0	0	7.255272529	0
GLS	0	0	0	0	0	0	0	0	0	0	0	6.146128346	0	0	0	0	0	6.95904144	0	0	0	0	0	0	0	0	0	0	0	0	0	0	0	0	0	0	0	0	0	0	0	0	0	0	7.462398013	0	0	0	0
SMC2	0	0	0	0	0	0	0	0	0	0	0	0	0	0	0	0	0	0	0	0	0	0	0	0	0	0	0	0	0	0	0	0	0	0	0	0	0	7.176091288	0	0	0	0	0	0	0	0	0	0	0
TXNDC12	0	0	0	0	0	0	7.43136378	0	0	0	7.278753624	0	7.176091288	0	0	0	0	0	0	0	0	0	0	0	0	0	0	0	0	0	0	0	0	0	0	0	0	0	0	0	0	0	0	0	0	0	0	0	0
EGFR	0	0	0	7.556302513	6.568201841	6.361728025	8.113943356	8.041392689	7.301030017	7.505149992	7.176091288	7.000000043	6.954242558	7.146128067	6.531479045	7.518513953	7.662757841	8.113943356	7.919078098	7.20412001	7.113943386	7.041392725	0	0	0	0	0	0	0	0	0	7.698970013	8.176091262	7.43136378	8.462397999	7.579783608	6.9731279	0	0	8.612783858	8.230448924	0	6.838849154	0	8.204119985	8.934498452	0	8.113943356	0
SNRNP70	0	0	0	0	0	0	0	0	0	0	0	0	0	0	0	0	0	0	0	0	0	0	0	0	0	0	0	0	0	0	0	6.176091549	0	0	6.113943686	0	0	0	0	0	0	0	0	0	0	0	0	8.255272508	8.447158033
PDHB	0	0	0	0	0	0	0	0	0	0	0	0	0	0	0	0	0	6.204120254	0	0	0	0	0	0	0	0	0	0	0	0	0	0	0	0	0	0	0	0	0	0	0	0	0	0	0	0	0	0	0
TOP2A	0	0	0	0	0	0	0	0	6.380211423	0	0	0	0	0	0	6.707570261	0	0	0	0	0	0	0	0	0	0	7.255272529	0	6.995635238	0	0	6.531479045	0	0	0	0	0	7.838849097	0	7.732393768	0	0	0	0	0	0	0	8.041392689	0
TPR	0	0	0	0	0	0	0	0	0	0	0	0	0	0	0	0	0	0	0	0	0	0	0	0	0	0	0	0	0	0	0	0	0	0	0	0	0	0	0	0	0	0	0	0	0	0	0	0	0
ETFA	0	0	0	0	0	0	6.579783711	6.755874932	6.748188105	6.73239384	6.99122612	6.986771779	6.568201841	6.740362768	6.491361834	6.518514071	6.929418977	7.079181282	6.995635238	0	0	0	0	0	0	0	0	0	0	0	0	6.924279338	0	0	0	6.763428068	0	0	0	0	0	0	0	0	6.892094658	0	0	8.113943356	8.39794001
ITGB4	0	0	0	0	0	0	8.591064608	8.544068046	8.531478918	7.944482677	7.778151258	7.832508919	7.556302513	0	6.255272746	0	0	0	0	0	0	0	0	0	0	0	0	0	0	0	0	7.361727855	8.380211244	7.806179981	8.255272508	7.875061269	0	0	0	8.903089988	8.230448924	0	0	6.531479045	9.113943353	9.643452677	0	8.643452677	0
STMN1	0	0	0	0	0	0	0	0	6.322219502	0	0	0	0	0	0	0	6.204120254	0	6.568201841	0	0	0	7.113943386	6.919078145	6.778151323	7.397940026	7.662757841	8.146128039	6.785329906	0	7.556302513	0	0	0	0	0	0	0	0	0	0	0	0	0	0	8.113943356	8.113943356	0	0
YBX3	0	0	0	0	0	0	0	0	0	0	0	0	0	7.20412001	7.255272529	0	0	0	6.505150114	0	0	0	0	7.079181282	6.477121399	0	0	0	0	7.690196089	0	0	0	0	7.278753624	0	0	0	0	0	0	0	0	0	0	0	0	7.785329842	8.39794001
HMGA1	0	0	0	0	0	0	0	0	0	0	0	0	0	0	0	0	0	0	0	0	0	0	0	0	0	0	0	0	7.301030017	0	0	0	0	0	0	0	0	0	0	8.07918125	0	0	0	0	0	7.462398013	0	0	0
EIF2S2	0	0	0	0	0	0	0	0	0	0	0	0	0	0	0	0	0	0	0	0	0	0	0	0	0	0	0	0	0	0	0	0	6.886490782	0	7.20412001	0	0	0	0	0	0	0	0	0	7.176091288	7.322219315	7.079181282	0	8.146128039
EIF4B	0	0	0	0	0	0	0	0	0	0	0	0	0	0	0	0	0	0	0	0	0	0	0	0	0	0	0	0	0	0	0	7.43136378	6.707570261	7.43136378	7.447158047	0	0	0	0	0	0	0	0	0	0	7.53147893	7.38021126	0	0
DNAJB1	0	0	0	0	0	0	0	0	0	0	0	0	0	0	0	0	0	0	0	0	0	0	0	0	0	0	0	0	0	7.462398013	0	7.505149992	7.342422701	7.755874863	7.662757841	0	0	0	0	0	0	0	0	0	0	7.662757841	0	8.477121256	7.53147893
MAP4	0	0	0	0	0	0	0	0	0	0	0	0	0	0	0	0	0	0	0	0	0	0	0	0	0	0	0	0	0	0	0	0	0	0	0	0	0	0	0	0	0	0	0	0	0	0	6.531479045	7.568201736	0
DNAJA1	6.612783963	0	0	7.342422701	0	0	7.079181282	6.65321261	6.99122612	0	0	0	7.322219315	0	0	0	7.255272529	6.556302621	7.255272529	6.963787875	6.301030213	6.913813905	0	0	0	8.255272508	8.41497335	8.361727838	7.653212523	7.740362697	7.869231726	7.591064618	7.447158047	7.38021126	7.146128067	7.491361708	7.230448947	7.934498456	0	8.176091262	8.255272508	0	7.477121269	0	7.301030017	8.146128039	8.342422683	8.518513941	7.544068057
HIBADH	0	0	0	0	0	0	0	0	0	0	6.568201841	6.633468557	6.690196169	0	0	0	6.681241328	0	0	0	0	0	0	0	0	0	0	0	0	0	0	0	0	0	0	0	0	0	0	0	0	0	0	0	0	0	0	0	0
MCM5	0	0	0	0	0	0	0	0	0	0	0	0	0	0	0	0	0	0	0	0	0	0	0	0	0	0	0	0	0	0	0	0	0	0	0	0	0	8.041392689	0	0	0	0	0	0	0	0	0	8.785329836	8.278753603
MCM7	0	0	0	0	0	0	0	0	0	0	0	0	0	0	0	0	0	0	0	0	0	0	0	0	0	0	6.968482995	6.763428068	6.9731279	6.6020601	6.505150114	7.43136378	0	7.301030017	0	0	0	8.556302502	0	0	0	0	0	0	0	0	0	8.845098041	8.544068046
FUS	0	0	0	0	0	0	0	0	0	0	0	0	0	0	0	0	0	0	0	0	0	0	7.301030017	0	0	0	0	0	0	0	0	0	0	0	6.397940182	0	0	0	0	0	0	0	0	0	0	0	0	8.322219297	0
ETFB	0	0	0	0	0	0	6.462398148	6.462398148	6.342422878	0	6.869231778	6.342422878	6.770852085	0	0	0	6.623249394	6.6020601	6.568201841	0	0	0	0	0	0	0	0	0	0	0	0	0	7.146128067	0	0	0	0	0	0	0	0	0	0	0	6.698970091	0	0	7.903089992	8.278753603
RBMX	0	0	0	0	0	0	0	0	0	0	0	0	0	0	0	0	0	0	0	0	0	0	0	0	0	0	0	0	0	0	0	0	0	0	0	0	0	0	0	0	0	0	0	0	0	0	0	7.806179981	0
RPS19	0	0	0	0	0	0	0	0	0	0	0	0	0	0	0	0	0	0	0	0	0	0	7.000000043	0	0	0	0	0	0	0	0	7.491361708	0	6.944482722	6.95904144	0	0	0	0	0	0	0	0	0	0	7.913813858	7.113943386	8.176091262	8.462397999
ECI1	0	0	0	0	0	0	0	0	0	0	6.491361834	6.643452775	6.414973515	0	0	0	6.724275952	6.778151323	6.79239176	0	0	0	0	0	0	0	0	0	0	0	0	0	0	0	0	0	0	0	0	0	0	0	0	0	0	0	0	0	0
RPS27	0	0	0	0	0	0	0	0	0	0	0	0	0	0	0	0	0	6.301030213	0	0	0	0	0	0	0	0	0	0	0	0	0	7.707570185	0	0	7.643452686	0	0	8.278753603	0	0	0	0	0	0	7.477121269	0	0	8.322219297	8.491361695
LRPPRC	0	0	0	0	0	0	0	0	0	0	6.748188105	6.342422878	6.681241328	6.301030213	0	0	6.531479045	6.531479045	6.568201841	0	0	0	0	0	0	0	0	0	0	0	0	0	6.724275952	0	0	6.681241328	0	0	0	0	0	0	0	0	6.724275952	0	0	0	0
MATR3	0	0	0	0	0	0	6.6020601	6.518514071	0	0	0	0	0	0	0	0	0	0	0	0	0	0	0	0	0	0	0	0	7.505149992	0	0	7.176091288	0	0	0	0	0	8.591064608	0	7.785329842	0	0	0	0	6.568201841	0	0	8.491361695	8.176091262
RANGAP1	0	0	0	0	0	0	0	0	0	0	0	0	0	0	0	0	0	0	0	0	0	0	0	0	0	0	0	0	6.176091549	0	0	0	0	0	0	0	0	0	0	7.113943386	0	0	0	0	6.176091549	7.838849097	7.301030017	8.361727838	8.79239169
RPL21	0	0	0	0	0	0	0	0	0	0	0	0	0	6.505150114	6.491361834	6.505150114	6.462398148	6.698970091	6.908485072	0	0	0	0	7.079181282	0	7.763428001	7.43136378	7.99122608	8.000000004	8.176091262	8.041392689	7.963787832	0	7.491361708	7.633468466	0	0	8.380211244	0	0	7.397940026	0	0	0	7.939519258	0	7.43136378	8.897627092	8.579783598
MSH6	0	0	0	0	0	0	0	0	0	0	0	0	0	0	0	0	0	0	0	0	0	0	0	0	0	0	0	0	0	0	0	6.65321261	0	0	0	0	0	8.176091262	0	0	0	0	0	0	0	0	0	7.342422701	0
SLC16A1	7.361727855	7.278753624	7.397940026	0	0	0	0	0	0	0	0	0	0	0	6.230449177	0	0	0	0	7.778151258	7.892094608	7.623249301	7.806179981	7.518513953	7.278753624	8.431363766	8.812913357	8.431363766	8.230448924	8.431363766	8.176091262	9.041392686	8.380211244	8.518513941	8.556302502	8.204119985	0	0	0	0	0	0	0	0	7.748188035	7.929418931	7.643452686	8.230448924	0
HADHB	0	0	0	0	0	0	0	0	0	0	6.740362768	6.342422878	6.698970091	0	0	0	6.531479045	6.748188105	6.869231778	0	0	0	0	0	0	0	0	0	0	0	0	0	0	0	0	0	0	0	0	0	0	0	0	0	0	0	6.880813649	0	0
ADAR	0	0	0	0	0	0	0	0	0	0	0	0	0	0	0	0	0	0	0	0	0	0	0	0	0	0	0	0	0	0	0	0	0	0	0	0	0	7.698970013	0	0	0	0	0	0	0	0	0	7.602060002	0
RPS20	7.38021126	7.447158047	6.968482995	0	0	0	0	0	0	0	0	0	0	0	0	0	6.146128346	6.491361834	6.322219502	7.255272529	7.397940026	7.146128067	7.633468466	7.477121269	7.38021126	7.653212523	8.07918125	8.07918125	8.000000004	7.886490731	7.929418931	7.934498456	0	0	7.763428001	7.414973365	7.146128067	8.633468457	0	7.812913363	0	0	0	0	7.491361708	7.612783867	6.491361834	8.949390007	8.897627092
PSME3	0	0	0	0	0	0	0	0	0	0	0	0	0	0	0	0	0	0	0	0	0	0	0	0	0	0	0	0	0	0	0	0	0	0	0	0	0	0	0	0	0	0	0	0	0	0	0	7.799340556	8.041392689
CNBP	0	0	0	0	0	0	0	0	0	0	0	0	0	0	0	0	0	0	0	0	0	0	0	0	0	0	0	0	0	0	0	0	0	0	7.230448947	0	0	0	0	0	0	0	0	0	0	0	0	0	0
RPS28	0	0	0	0	0	0	0	0	0	0	0	0	0	0	0	0	0	0	0	0	0	0	0	0	0	0	0	0	0	0	0	0	0	0	6.623249394	0	0	0	0	0	0	0	0	0	0	0	6.812913423	8.113943356	0
RPL8	0	0	0	0	0	0	0	0	0	0	0	0	0	0	0	7.53147893	6.146128346	6.230449177	6.612783963	0	0	0	7.079181282	0	0	7.963787832	8.041392689	8.255272508	8.301029998	8.113943356	8.113943356	7.43136378	0	0	7.959041397	0	0	8.113943356	0	0	7.38021126	0	0	0	6.662757926	0	6.623249394	9.041392686	8.602059992
YBX1	0	0	0	0	0	0	0	0	0	0	0	0	0	7.20412001	7.255272529	0	0	0	6.505150114	0	0	0	7.544068057	7.477121269	7.146128067	5.973128316	6.176091549	5.929419437	7.698970013	7.913813858	7.602060002	7.568201736	0	7.20412001	7.518513953	0	0	0	0	0	0	0	0	0	6.623249394	7.963787832	0	8.342422683	8.653212515
EIF4G2	0	0	0	0	0	0	0	0	0	0	0	0	0	0	0	0	0	0	0	0	0	0	0	0	0	7.38021126	6.342422878	6.755874932	6.342422878	0	0	6.477121399	6.204120254	5.681242142	6.612783963	0	0	0	0	7.397940026	7.255272529	7.041392725	0	0	0	7.929418931	6.934498502	7.959041397	7.799340556
GTF2I	0	0	0	0	0	0	0	0	0	0	0	0	0	0	0	0	0	0	0	0	0	0	0	0	0	0	0	0	0	0	0	0	0	0	0	0	0	8.361727838	0	0	0	0	0	0	0	0	0	7.491361708	0
FKBP3	0	0	0	0	0	0	0	0	0	0	0	0	0	0	0	0	0	0	0	0	0	0	0	0	0	0	0	0	0	0	0	0	0	0	0	0	0	0	0	0	0	0	0	0	0	7.662757841	0	0	0
PLCB3	0	0	0	0	0	0	0	0	0	0	0	0	0	6.230449177	0	0	6.591064718	6.73239384	6.707570261	0	0	0	0	0	0	0	0	0	0	0	0	7.414973365	7.079181282	7.079181282	6.230449177	0	0	0	0	0	6.919078145	0	0	0	7.20412001	8.531478918	7.230448947	0	0
OGDH	0	0	0	0	0	0	0	0	6.414973515	0	6.977723651	6.414973515	6.9731279	0	0	0	0	6.662757926	6.73239384	0	0	0	7.041392725	0	0	0	0	0	0	0	6.875061321	7.301030017	0	0	0	0	0	0	0	0	0	0	0	0	6.838849154	0	0	0	0
SRSF1	0	0	0	0	0	0	0	0	0	0	0	0	0	0	0	0	0	0	0	0	0	0	0	0	0	0	0	0	0	0	0	0	0	0	0	0	0	7.477121269	0	0	0	0	0	0	6.875061321	0	0	8.72427587	8.278753603
TWF1	6.255272746	0	0	0	0	0	0	0	0	0	0	0	0	0	0	0	0	0	0	0	0	0	0	0	0	0	0	0	0	0	0	7.230448947	7.146128067	7.568201736	7.278753624	0	0	0	0	0	0	0	0	0	6.954242558	7.99122608	7.322219315	7.913813858	7.97772361
AIMP1	0	0	0	0	0	0	0	0	0	0	0	0	0	0	0	0	0	0	0	0	0	0	0	0	0	0	0	0	0	0	0	6.322219502	0	0	0	0	0	8.380211244	0	0	0	0	0	0	0	0	0	8.041392689	0
ECH1	0	0	0	0	0	0	0	0	6.963787875	6.944482722	6.778151323	6.690196169	0	0	0	0	7.079181282	7.176091288	6.869231778	0	0	0	0	0	0	0	0	0	0	0	0	0	0	0	0	0	0	0	0	0	0	0	0	0	7.301030017	0	0	0	0
PRKAA1	0	0	0	0	0	0	0	0	0	0	0	0	0	0	0	0	0	0	0	0	0	0	0	0	0	0	0	0	0	0	0	0	0	0	6.27875383	0	0	0	0	0	0	0	0	0	0	7.544068057	7.079181282	7.778151258	7.477121269
G3BP1	0	0	0	0	0	0	0	0	0	0	0	0	0	0	0	0	0	0	0	0	0	0	0	0	0	0	0	0	0	0	0	0	0	0	5.886491289	0	0	0	0	0	0	0	0	0	0	0	0	8.531478918	8.579783598
SMC1A	0	0	0	0	0	0	0	0	0	0	0	0	0	0	0	0	0	0	0	0	0	0	0	0	0	0	0	0	0	0	0	0	0	0	0	0	0	0	0	0	0	0	0	0	0	0	0	7.414973365	0
NOLC1	0	0	0	0	0	0	0	0	0	0	0	0	0	0	0	0	0	0	0	0	0	0	0	0	0	0	0	0	0	0	0	0	0	0	0	0	0	0	0	0	0	0	0	0	0	0	0	0	8.07918125
RCN1	0	0	0	0	0	0	0	7.602060002	7.53147893	0	7.681241246	6.568201841	7.799340556	0	0	0	0	0	0	0	0	0	0	0	0	0	0	0	0	0	0	0	7.748188035	0	0	7.20412001	0	0	0	0	0	0	0	0	0	0	0	0	0
NSDHL	0	0	0	0	0	0	0	7.041392725	6.748188105	6.04139308	7.491361708	7.342422701	7.361727855	0	6.505150114	0	0	0	0	0	0	0	0	0	0	0	0	0	0	0	0	0	6.963787875	0	0	0	0	0	0	0	0	0	0	0	0	0	0	0	0
RALY	0	0	0	0	0	0	0	0	0	0	0	0	0	0	0	0	0	0	0	0	0	0	0	0	0	0	0	0	6.681241328	0	0	0	0	0	0	0	0	7.838849097	0	0	0	0	0	0	0	0	0	8.322219297	7.176091288
SRSF11	0	0	0	0	0	0	0	0	0	0	0	0	0	0	0	0	0	0	0	0	0	0	0	0	0	0	0	0	0	0	0	0	0	0	0	0	0	0	0	0	0	0	0	0	0	0	0	8.176091262	7.826074809
UBAP2L	0	0	0	0	0	0	0	0	0	0	0	0	0	0	0	0	0	0	0	0	0	0	0	0	0	0	0	0	0	0	0	0	0	0	0	0	0	0	0	0	0	0	0	0	0	0	6.785329906	0	0
LARP1	0	0	0	0	0	0	0	0	0	0	0	0	0	0	0	0	0	0	0	0	0	0	0	0	0	0	6.322219502	0	0	0	0	0	0	0	6.079181608	0	0	0	0	0	0	0	0	0	0	0	0	7.653212523	7.43136378
KTN1	0	0	0	0	0	0	0	0	0	0	0	0	0	0	0	0	0	0	0	0	0	0	0	0	0	0	0	0	0	0	0	0	0	0	0	0	0	0	0	0	0	0	0	0	0	0	0	0	0
SERBP1	0	0	0	0	0	0	0	0	0	0	0	0	0	0	0	0	0	0	0	0	0	0	0	0	0	0	6.579783711	6.255272746	6.643452775	6.230449177	0	7.322219315	6.322219502	0	7.278753624	0	0	0	0	0	0	0	0	0	0	0	0	0	0
HSPH1	0	6.716003427	0	0	0	0	0	0	0	0	0	0	0	0	0	0	6.845098102	6.95904144	6.755874932	6.763428068	7.041392725	6.869231778	0	7.041392725	0	7.491361708	7.755874863	8.041392689	7.43136378	7.505149992	0	7.792391697	7.113943386	7.838849097	7.301030017	7.176091288	0	0	0	7.602060002	7.662757841	0	0	0	0	8.579783598	7.838849097	8.462397999	8.113943356
RAD50	0	0	0	0	0	0	0	0	0	0	0	0	0	0	0	0	0	0	0	0	0	0	0	0	0	0	0	0	0	0	0	0	0	0	0	0	0	7.518513953	0	0	0	0	0	0	0	0	0	7.43136378	0
USP7	0	0	0	0	0	0	0	0	0	0	0	0	0	0	0	0	0	0	0	0	0	0	0	0	0	0	0	0	0	0	0	0	0	0	0	0	0	8.07918125	0	0	0	0	0	0	0	0	0	8.000000004	8.322219297
FKBP10	0	0	0	0	0	0	7.698970013	8.041392689	7.778151258	7.447158047	8.041392689	7.845098046	7.838849097	0	0	0	7.146128067	7.477121269	7.361727855	0	0	0	0	0	0	0	0	0	0	0	0	0	0	0	0	0	0	0	0	0	0	0	0	0	0	0	0	0	0
CCDC124	0	0	0	0	0	0	0	0	0	0	0	0	0	0	0	0	0	0	0	0	0	0	0	0	0	0	0	0	0	0	0	0	0	0	0	0	0	0	0	0	0	0	0	0	0	0	0	0	0
PFDN5	0	0	0	0	0	0	0	0	0	0	0	0	0	0	0	0	0	0	0	0	0	0	0	0	0	0	6.462398148	0	0	0	0	6.819544001	0	5.892095159	6.431363925	0	0	0	0	6.995635238	0	0	0	0	0	8.07918125	0	0	0
HSD17B10	0	0	0	0	0	0	0	0	0	0	6.73239384	6.643452775	6.740362768	0	0	0	6.95904144	6.903090041	6.934498502	0	0	0	0	0	0	0	0	0	0	0	0	0	0	0	0	0	0	0	0	0	0	0	0	0	0	0	0	0	0
ACO2	0	0	0	0	0	0	0	0	0	0	6.79239176	6.869231778	6.857332557	0	0	0	7.255272529	7.255272529	7.20412001	0	0	0	0	0	0	0	0	0	0	0	0	0	0	0	0	0	0	0	0	0	0	0	0	0	6.04139308	0	0	8.698970005	9.146128036
TXNDC17	0	0	0	0	0	0	0	0	0	0	0	0	0	0	0	0	6.6020601	6.698970091	6.544068168	6.845098102	0	0	6.857332557	0	0	7.568201736	6.681241328	0	0	0	0	7.041392725	7.301030017	7.322219315	7.230448947	0	0	0	0	0	0	7.863322866	0	0	7.414973365	8.806179975	7.579783608	8.278753603	8.322219297
CACYBP	0	0	0	0	0	0	0	0	0	0	0	0	0	0	0	0	0	0	0	0	0	0	0	0	0	7.826074809	6.73239384	7.38021126	6.505150114	0	6.65321261	7.342422701	0	7.041392725	7.342422701	0	0	0	0	0	0	0	0	0	0	8.322219297	7.342422701	0	0
DDX21	0	0	0	0	0	0	0	0	0	0	0	0	0	6.845098102	7.000000043	6.924279338	0	0	0	0	0	0	0	0	0	0	0	0	7.301030017	7.079181282	7.146128067	0	0	0	0	0	0	8.431363766	0	0	0	0	0	0	0	0	0	8.361727838	8.204119985
ATAD3A	0	0	0	0	0	0	0	0	0	0	0	0	0	0	0	0	7.000000043	6.880813649	6.73239384	0	0	0	0	0	0	0	0	0	0	0	0	0	0	0	0	0	0	0	0	0	0	0	0	0	0	0	0	0	0
TES	0	0	0	0	0	0	0	0	0	0	0	0	0	0	0	0	0	0	0	0	0	0	0	0	0	0	0	0	0	0	0	0	0	7.113943386	0	0	0	0	0	0	0	0	0	0	0	7.755874863	0	0	0
LIMA1	0	0	0	0	0	0	0	0	0	0	0	0	0	0	0	0	0	0	0	0	0	0	0	0	0	0	0	0	0	0	0	0	6.447158186	6.982271278	6.924279338	0	0	0	0	0	0	0	0	0	6.000000434	7.716003352	0	0	0
PFDN2	0	0	0	0	0	0	6.690196169	0	6.414973515	0	0	0	0	0	0	0	0	0	0	0	0	0	0	0	0	0	0	7.278753624	0	0	0	7.079181282	6.99122612	6.95904144	7.041392725	0	0	0	0	0	0	0	0	0	0	8.301029998	0	0	0
STOML2	0	0	0	0	0	0	0	0	0	0	0	0	0	0	0	0	7.176091288	7.361727855	7.342422701	0	0	0	0	0	0	0	0	0	0	0	0	6.568201841	0	5.602061077	0	0	0	0	0	0	0	0	0	0	0	0	0	0	0
STUB1	0	0	0	0	0	0	0	0	0	0	0	0	0	0	0	0	0	0	0	0	0	0	0	0	0	0	0	0	0	0	0	0	6.934498502	6.995635238	6.755874932	0	0	7.556302513	0	0	0	0	0	0	0	7.591064618	7.763428001	0	0
PLAA	0	0	0	0	0	0	0	0	0	0	0	0	0	0	0	0	0	0	0	0	0	0	0	0	0	0	0	0	0	0	0	0	0	0	0	0	0	0	0	0	0	0	0	0	0	0	0	8.176091262	8.230448924
NUDC	0	0	0	0	0	0	0	0	0	0	0	0	0	0	7.491361708	0	6.531479045	0	0	0	0	0	0	0	0	7.079181282	7.851258355	7.869231726	0	0	0	0	0	0	0	0	0	0	0	0	0	0	0	0	0	8.000000004	7.079181282	7.832508919	0
FARSA	0	0	0	0	0	0	0	0	0	0	0	0	0	0	0	6.707570261	0	0	0	0	0	0	0	0	0	0	0	0	0	0	0	6.414973515	0	5.83884972	0	0	0	8.041392689	0	0	0	0	0	0	0	0	0	7.698970013	8.342422683
LUC7L2	0	0	0	0	0	0	0	0	0	0	0	0	0	0	0	0	0	0	0	0	0	0	0	0	0	0	0	0	0	0	0	0	0	0	0	0	0	7.146128067	0	0	0	0	0	0	0	0	0	7.322219315	7.38021126
STRAP	0	0	0	0	0	0	0	0	0	0	0	6.414973515	0	0	0	0	0	0	0	0	0	0	0	0	0	0	7.579783608	0	0	7.477121269	0	7.591064618	7.041392725	0	7.414973365	0	0	0	0	0	0	0	0	0	0	7.707570185	7.113943386	8.86923172	8.913813853
RPL36	0	0	0	0	0	0	0	0	0	0	0	0	0	0	0	0	0	0	0	0	0	0	0	0	0	0	0	0	0	0	0	0	0	0	0	0	0	8.301029998	0	0	0	0	0	0	0	0	0	8.176091262	0
IGF2BP2	0	0	0	0	0	0	0	0	0	0	0	0	0	0	0	0	0	0	0	0	0	0	0	0	0	6.681241328	0	0	0	0	6.755874932	0	0	0	0	0	0	0	0	0	0	0	0	0	6.505150114	0	6.954242558	7.491361708	7.662757841
VBP1	0	0	0	0	0	0	0	0	0	0	0	0	0	0	0	0	6.924279338	6.230449177	6.857332557	0	0	0	0	0	0	0	0	0	0	0	0	0	0	6.763428068	0	0	0	0	0	0	0	0	0	0	7.230448947	7.681241246	7.278753624	0	0
HNRNPUL1	0	0	0	0	0	0	0	0	0	0	0	0	0	0	0	0	0	0	0	0	0	0	0	0	0	0	0	0	0	0	0	0	0	0	0	0	0	7.53147893	0	0	0	0	0	0	0	0	0	8.301029998	8.176091262
KHSRP	0	0	0	0	0	0	0	0	0	0	0	0	0	0	0	0	0	0	0	0	0	0	0	0	0	0	0	0	6.690196169	0	0	0	0	0	0	0	0	0	0	0	0	0	0	0	0	0	0	7.698970013	7.579783608
HGS	0	0	0	0	0	0	0	6.431363925	0	0	0	0	0	0	0	0	0	0	0	0	0	0	0	0	0	8.591064608	8.556302502	8.602059992	7.806179981	8.000000004	7.826074809	7.342422701	6.556302621	7.397940026	8.41497335	0	0	0	0	7.544068057	0	0	0	0	6.875061321	7.748188035	7.447158047	8.041392689	0
PPP1R12A	0	0	0	0	0	0	0	0	0	0	0	0	0	0	0	0	5.79239239	0	6.27875383	0	0	0	0	0	0	0	0	0	0	0	0	0	6.342422878	0	6.146128346	0	0	0	0	0	0	0	0	0	0	0	7.041392725	0	7.477121269
ACTL6A	0	0	0	0	0	0	0	0	0	0	0	0	0	0	0	0	0	0	0	0	0	0	0	0	0	0	0	0	0	0	0	0	0	0	0	0	0	0	0	7.278753624	0	0	0	0	0	0	0	9.113943353	8.963787828
IMPA1	0	0	0	0	0	0	0	0	0	0	0	0	0	0	0	0	0	0	0	0	0	0	0	0	0	0	0	0	0	0	0	0	0	0	0	0	0	0	0	0	0	0	0	0	0	0	0	0	0
GNPDA1	0	0	0	0	0	0	0	0	0	0	0	0	0	0	0	0	0	0	0	0	0	0	0	0	0	0	0	0	0	0	0	0	0	0	0	0	0	0	0	0	0	0	0	0	0	0	7.447158047	0	0
GMFB	0	0	0	0	0	0	0	0	0	0	0	0	0	0	0	0	0	0	0	0	0	7.301030017	0	0	0	0	0	0	0	0	0	7.20412001	0	7.414973365	0	0	0	0	0	0	7.447158047	0	0	0	0	7.897627097	7.38021126	7.301030017	8.531478918
SQSTM1	0	0	0	0	0	0	0	0	0	0	0	0	0	0	0	0	0	0	0	6.79239176	0	0	0	0	0	0	0	0	0	0	0	8.380211244	7.462398013	7.361727855	8.146128039	7.301030017	0	0	0	7.342422701	0	0	0	0	7.491361708	0	7.20412001	7.880813598	0
PITPNB	0	0	0	0	0	0	0	0	0	0	0	0	0	0	0	0	0	0	0	0	0	0	0	0	0	0	0	0	0	0	0	0	0	7.792391697	0	6.995635238	0	0	0	0	0	0	0	0	0	7.886490731	7.322219315	0	0
DLAT	0	0	0	0	0	0	6.698970091	6.633468557	6.785329906	0	7.176091288	7.079181282	6.869231778	0	0	0	7.041392725	7.000000043	6.95904144	0	0	0	0	0	0	0	0	0	0	0	0	0	0	0	0	0	0	0	0	0	0	0	0	0	0	0	0	7.826074809	8.681241238
ANP32A	0	0	0	0	0	0	0	0	0	0	0	0	0	0	0	0	0	0	0	0	0	0	0	0	0	0	0	0	0	0	0	0	0	0	0	0	0	0	0	0	0	0	0	0	0	0	0	8.579783598	8.812913357
PDHA1	0	0	0	0	0	0	0	0	0	0	0	0	0	0	0	0	6.431363925	6.518514071	6.568201841	0	0	0	0	0	0	0	0	0	0	0	0	0	0	0	0	0	0	0	0	0	0	0	0	0	0	0	0	0	0
SNRPA1	0	0	0	0	0	0	0	0	0	0	0	6.146128346	0	0	0	0	0	0	0	0	0	0	0	0	0	0	0	0	0	0	0	0	0	0	0	0	0	7.633468466	0	0	0	0	0	0	0	0	0	7.973127858	8.361727838
ACADM	0	0	0	0	0	0	0	0	0	0	0	0	0	0	0	0	7.000000043	6.85125841	6.924279338	0	0	0	0	0	0	0	0	0	0	0	0	0	0	0	0	0	0	0	0	0	0	0	0	0	0	0	0	0	0
IDH3A	0	0	0	0	0	0	0	0	0	0	0	0	0	0	0	0	0	6.518514071	0	0	0	0	0	0	0	0	0	0	0	0	0	0	0	0	0	0	0	0	0	0	0	0	0	0	0	0	0	0	0
OXCT1	0	0	0	0	0	0	0	0	0	0	0	0	0	0	0	0	0	0	0	0	0	0	0	0	0	0	0	0	0	0	0	0	0	0	0	0	0	0	0	0	0	0	0	0	0	0	0	7.633468466	0
KHDRBS1	0	0	0	0	0	0	0	0	0	0	0	0	0	0	0	0	0	0	0	0	0	0	0	0	0	0	0	0	0	0	0	0	0	0	0	0	0	7.819543942	0	0	0	0	0	0	0	0	0	8.903089988	8.74036269
PPP3CA	0	0	6.146128346	0	0	0	0	0	0	0	0	0	0	0	0	0	0	0	0	0	0	6.591064718	0	0	0	0	0	0	0	0	0	0	0	0	6.86332292	0	0	0	0	0	0	0	0	0	6.880813649	8.113943356	0	7.633468466	8.230448924
NSUN2	0	0	0	0	0	0	0	0	0	0	0	0	0	0	0	0	0	0	0	0	0	0	0	0	0	0	0	0	0	0	0	6.447158186	0	0	0	0	0	8.230448924	0	0	0	0	0	0	0	0	0	8.255272508	7.995635199
SCRN1	0	0	0	0	0	0	0	0	0	0	0	0	0	0	0	0	0	0	0	0	0	0	0	0	0	0	0	0	0	0	0	0	0	0	6.544068168	0	0	0	0	0	0	0	0	0	6.230449177	0	7.602060002	0	8.146128039
SART3	0	0	0	0	0	0	0	0	0	0	0	0	0	0	0	0	0	0	0	0	0	0	0	0	0	0	0	0	0	0	0	0	0	0	0	0	0	7.819543942	0	0	0	0	0	0	0	0	0	7.544068057	7.778151258
DECR1	0	0	0	0	0	0	0	0	0	0	6.544068168	0	0	0	0	0	6.531479045	6.67209795	6.544068168	0	0	0	0	0	0	0	0	0	0	0	0	0	0	0	0	0	0	0	0	0	0	0	0	0	0	0	0	0	0
NUP93	0	0	0	0	0	0	0	0	0	0	0	0	0	0	0	0	0	0	0	0	0	0	0	0	0	0	0	0	0	0	0	0	0	0	0	0	0	0	0	0	0	0	0	0	0	0	0	0	7.982271238
CPSF7	0	0	0	0	0	0	0	0	0	0	0	0	0	0	0	0	0	0	0	0	0	0	0	0	0	0	0	0	0	0	0	0	0	0	0	0	0	0	0	0	0	0	0	0	0	0	0	7.903089992	8.07918125
PSPC1	0	0	0	0	0	0	0	0	0	0	0	0	0	0	0	0	0	0	0	0	0	0	0	0	0	0	0	0	0	0	0	0	0	0	0	0	0	0	0	0	0	0	0	0	0	0	0	8.041392689	7.623249301
EIF2A	0	0	0	0	0	0	0	0	0	0	0	0	0	0	0	0	0	0	0	0	0	0	0	0	0	0	0	0	0	0	0	0	0	0	0	0	0	0	0	0	0	0	0	0	0	0	0	8.255272508	8.431363766
IARS2	0	0	0	0	0	0	0	0	0	0	0	0	0	0	0	0	6.531479045	6.799340618	6.301030213	0	0	0	0	0	0	0	0	0	0	0	0	0	0	0	0	0	0	0	0	0	0	0	0	0	6.897627146	0	0	0	0
MCTS1	0	0	0	0	0	0	0	0	0	0	0	0	0	0	0	0	0	0	0	0	0	0	0	0	0	0	0	0	0	0	0	0	0	0	6.447158186	0	0	0	0	7.397940026	0	0	0	0	0	7.763428001	0	7.897627097	8.39794001
SNX9	0	0	0	0	0	0	0	0	0	0	0	0	0	0	0	0	0	0	0	0	0	0	0	0	0	0	0	0	0	0	0	0	0	0	0	0	0	0	0	0	8.041392689	0	0	0	0	0	7.230448947	7.602060002	8.146128039
CPSF6	0	0	0	0	0	0	0	0	0	0	0	0	0	0	0	0	0	0	0	0	0	0	0	0	0	0	7.146128067	7.041392725	7.462398013	7.176091288	7.041392725	0	0	0	0	0	0	0	0	6.531479045	0	0	0	0	0	0	0	0	0
SUPT5H	0	0	0	0	0	0	0	0	0	0	0	0	0	0	0	0	0	0	0	0	0	0	0	0	0	0	0	0	0	0	0	0	0	0	0	0	0	0	0	0	0	0	0	0	0	0	0	0	0
PRPF4	0	0	0	0	0	0	0	0	0	0	0	0	0	0	0	0	0	0	0	0	0	0	0	0	0	0	0	0	0	0	0	0	0	0	0	0	0	0	0	0	0	0	0	0	0	0	0	7.544068057	0
PSIP1	0	0	0	0	0	0	0	0	0	0	0	0	0	0	0	0	0	0	0	0	0	0	0	0	0	0	0	0	0	0	0	0	0	0	0	0	0	0	0	0	0	0	0	0	0	0	0	0	0
NPM3	0	0	0	0	0	0	0	0	0	0	0	0	0	0	0	0	0	0	0	0	0	0	0	0	0	0	0	0	0	0	0	0	0	0	0	0	0	0	0	0	0	0	0	0	0	0	0	0	8.556302502
RPL35A	0	0	0	0	0	0	0	0	0	0	0	0	0	0	6.505150114	0	0	6.204120254	6.27875383	0	0	0	0	0	0	0	6.690196169	0	0	0	0	7.322219315	0	0	7.447158047	0	0	0	0	0	0	0	0	0	0	0	0	0	0
LMNB1	0	0	0	0	0	0	0	0	0	0	0	0	0	0	0	0	0	0	0	0	0	0	0	0	0	0	0	0	0	0	0	0	0	0	0	0	0	7.278753624	0	0	0	0	0	0	0	0	0	7.880813598	0
RPL34	0	0	0	0	0	0	0	0	0	0	0	0	0	0	0	0	6.591064718	6.544068168	0	0	0	0	0	0	0	0	0	0	0	0	0	0	0	0	7.447158047	0	0	0	0	0	0	0	0	0	0	0	0	0	0
MCM2	0	0	0	0	0	0	0	0	0	0	0	0	0	0	0	0	0	0	0	0	0	0	0	0	0	0	0	0	0	0	0	0	0	0	0	0	0	7.724275878	0	0	0	0	0	0	0	0	0	9.041392686	8.633468457
RBM25	0	0	0	0	0	0	0	0	0	0	0	0	0	0	0	0	0	0	0	0	0	0	0	0	0	0	0	0	0	0	0	0	0	0	0	0	0	0	0	0	0	0	0	0	0	0	0	7.38021126	0
RPL37A	0	0	0	0	0	0	0	0	0	0	0	0	0	0	0	0	0	0	0	0	0	0	0	0	0	0	0	0	0	0	0	0	0	0	0	0	0	0	0	0	0	0	0	0	0	0	0	0	0
SNRPD2	0	0	0	0	0	0	0	0	0	0	0	0	0	6.000000434	0	0	0	0	0	0	0	0	0	0	0	0	0	0	0	0	0	0	0	0	0	0	0	0	0	0	0	0	0	0	0	0	0	8.361727838	8.838849091
SF3B2	0	0	0	0	0	0	0	0	0	0	0	0	0	0	0	0	0	0	0	0	0	0	0	0	0	0	0	0	0	0	0	0	0	0	0	0	0	0	0	0	0	0	0	0	0	0	0	0	7.568201736
SF3A2	0	0	0	0	0	0	0	0	0	0	0	0	0	0	0	0	0	0	0	0	0	0	0	0	0	0	0	0	0	0	0	0	0	0	0	0	0	0	0	0	0	0	0	0	0	0	0	7.643452686	7.361727855
SF3A1	0	0	0	0	0	0	0	0	0	0	0	0	0	0	0	0	0	0	0	0	0	0	0	0	0	0	0	0	0	0	0	0	0	0	0	0	0	0	0	0	0	0	0	0	0	0	0	7.633468466	0
DBN1	0	0	0	0	0	0	0	0	0	0	0	0	0	0	0	0	0	0	0	0	6.79239176	6.698970091	0	0	0	0	0	0	0	0	0	7.397940026	6.995635238	7.113943386	0	0	0	0	0	0	0	0	0	0	0	0	7.301030017	8.301029998	8.230448924
ALYREF	0	0	0	0	0	0	0	0	5.908485555	0	0	0	0	0	0	7.146128067	0	0	0	0	0	0	0	0	0	0	0	0	0	0	7.079181282	0	0	0	0	0	0	0	0	0	0	0	0	0	0	0	0	0	0
CARM1	0	0	0	0	0	0	0	0	0	0	0	0	0	0	0	0	0	0	6.612783963	0	0	0	0	0	0	0	0	0	6.799340618	0	0	0	0	0	0	0	0	0	0	0	0	0	0	0	0	0	0	7.892094608	0
COLGALT1	0	0	0	0	0	0	7.146128067	7.176091288	7.079181282	7.146128067	7.255272529	7.000000043	6.968482995	0	0	0	6.431363925	0	0	0	0	0	0	0	0	0	0	0	0	0	0	0	7.255272529	0	0	0	0	0	0	0	0	0	0	0	0	0	0	7.662757841	0
SNRNP40	0	0	0	0	0	0	0	0	0	0	0	0	0	0	0	0	0	0	0	0	0	0	0	0	0	0	0	0	0	0	0	0	0	0	0	0	0	0	0	0	0	0	0	0	0	0	0	8.176091262	7.908485024
SF3B5	0	0	0	0	0	0	0	0	0	0	0	0	0	0	0	0	0	0	0	0	0	0	0	0	0	0	0	0	0	0	0	0	0	0	0	0	0	0	0	0	0	0	0	0	0	0	0	0	8.041392689
SRRT	0	0	0	0	0	0	0	0	0	0	0	0	0	0	0	0	0	0	0	0	0	0	0	0	0	0	0	0	0	0	0	0	0	0	0	0	0	7.913813858	0	0	0	0	0	0	0	0	0	8.342422683	8.278753603
DIABLO	0	0	0	0	0	0	0	0	0	0	0	0	0	0	0	0	0	0	0	0	0	0	0	0	0	0	0	0	0	0	0	0	0	0	0	0	0	0	0	0	0	0	0	0	0	0	0	0	0
SMC3	0	0	0	0	0	0	0	0	0	0	0	0	0	0	0	0	6.9731279	6.643452775	6.819544001	0	0	0	0	0	0	0	0	0	0	0	0	0	0	0	0	0	0	0	0	0	0	0	0	0	0	0	7.724275878	0	0
THRAP3	0	0	0	0	0	0	0	0	0	0	0	0	0	0	0	0	0	0	0	0	0	0	0	0	0	0	0	0	0	0	0	0	0	0	0	0	0	0	0	0	0	0	0	0	0	0	0	0	8.041392689
RBM8A	0	0	0	0	0	0	0	0	0	0	0	0	0	0	0	0	0	0	0	0	0	0	0	0	0	0	0	0	0	0	0	0	0	0	0	0	0	0	0	0	0	0	0	0	0	7.414973365	0	0	0
MCM4	0	0	0	0	0	0	0	0	0	0	0	0	0	0	0	0	0	0	0	0	0	0	0	0	0	0	0	0	0	0	0	0	0	0	0	0	0	8.301029998	0	0	0	0	0	0	0	0	0	8.897627092	8.653212515
PUF60	0	0	0	0	0	0	0	0	0	0	0	0	0	0	7.000000043	0	0	0	0	0	0	0	0	0	0	0	0	0	0	0	0	0	0	0	0	0	0	0	0	0	0	0	0	0	0	0	6.591064718	0	0
SRSF6	0	0	0	0	0	0	6.662757926	0	6.716003427	0	0	0	0	0	0	0	0	0	0	0	0	0	0	0	0	0	0	0	0	0	0	0	0	0	0	0	0	7.968482953	0	0	0	0	0	0	0	0	0	9.079181246	8.361727838
SMARCA5	0	0	0	0	0	0	0	0	0	0	0	0	0	0	0	0	0	0	0	0	0	0	0	0	0	0	0	0	0	0	0	0	0	0	0	0	0	7.99122608	0	0	0	0	0	0	0	0	0	7.892094608	7.812913363
VAPB	0	0	0	0	0	0	0	0	0	0	0	0	0	0	0	0	0	0	0	0	0	0	0	0	0	0	0	0	0	0	0	7.113943386	0	0	0	0	0	0	0	0	0	0	0	0	0	0	6.819544001	0	0
NUMA1	0	0	0	0	0	0	0	0	0	0	0	0	0	0	0	0	0	0	0	0	0	0	0	0	0	0	0	0	0	0	0	0	0	0	0	0	0	6.977723651	0	0	0	0	0	0	0	0	0	7.301030017	6.301030213
EDC4	0	0	0	0	0	0	0	0	0	0	0	0	0	0	0	0	0	0	0	0	0	0	0	0	0	0	0	0	0	0	0	7.113943386	0	0	0	0	0	0	0	0	0	0	0	0	0	0	0	0	0
FAM120A	0	0	0	0	0	0	0	0	0	0	0	0	0	0	0	0	0	0	0	0	0	0	0	0	0	0	0	0	0	0	0	0	0	0	0	0	0	7.43136378	0	0	0	0	0	0	0	0	0	7.491361708	7.724275878
EWSR1	0	0	0	0	0	0	0	0	0	0	0	0	0	0	0	0	0	0	0	0	0	0	0	0	0	0	0	0	0	0	0	0	0	0	0	0	0	0	0	0	0	0	0	0	0	0	0	7.826074809	0
PLOD2	0	0	0	0	0	0	6.462398148	6.698970091	0	0	6.869231778	6.924279338	6.698970091	0	0	0	0	0	0	0	0	0	0	0	0	0	0	0	0	0	0	0	0	0	0	0	0	0	0	0	0	0	0	0	7.000000043	0	0	8.041392689	0
AGR2	0	0	0	0	0	0	8.968482949	8.944482673	8.886490726	8.851258349	8.447158033	7.544068057	8.278753603	7.544068057	7.591064618	7.544068057	7.301030017	7.361727855	6.85125841	0	0	0	0	0	0	0	0	0	0	0	0	8.431363766	0	0	0	0	0	0	0	0	0	0	0	0	8.301029998	7.633468466	0	0	0
OAT	0	0	0	0	0	0	0	0	0	0	0	0	0	0	0	0	7.176091288	6.963787875	6.716003427	0	0	0	0	0	0	0	0	0	0	0	0	6.643452775	0	0	0	0	0	0	0	0	0	0	0	0	6.462398148	0	0	7.97772361	8.342422683
TACSTD2	7.716003352	7.38021126	7.982271238	0	0	0	7.653212523	7.755874863	7.748188035	7.462398013	7.763428001	7.591064618	7.602060002	0	0	0	0	0	0	0	0	0	0	0	0	0	0	0	0	0	0	8.230448924	8.851258349	8.146128039	8.681241238	8.447158033	0	8.380211244	0	7.732393768	0	0	0	0	8.50514998	9.73239376	0	9.230448922	0
HMOX2	0	0	0	0	0	0	0	0	0	0	6.690196169	6.462398148	0	0	0	0	0	0	0	0	0	0	0	0	0	0	0	0	0	0	0	0	0	0	0	0	0	0	0	0	0	0	0	0	0	0	0	0	0
HNRNPH3	0	0	0	0	0	0	0	0	0	0	0	0	0	0	0	0	0	0	0	0	0	0	0	0	0	0	0	0	0	0	0	0	0	0	0	0	0	8.113943356	0	0	0	0	0	0	0	0	0	0	0
PYCR1	0	0	0	0	0	0	0	0	0	0	6.857332557	6.380211423	6.477121399	0	0	0	0	7.041392725	6.968482995	0	0	0	0	0	0	0	0	0	0	0	0	7.778151258	0	0	0	0	0	0	0	0	0	0	0	0	0	0	0	0	0
TMPO	0	0	0	0	0	0	0	0	0	0	0	0	0	0	0	0	0	0	0	0	0	0	0	0	0	0	0	0	0	0	0	0	0	0	0	0	0	7.838849097	0	0	0	0	0	0	0	0	0	7.397940026	0
SUCLG1	0	0	0	0	0	0	0	0	0	0	0	0	0	0	0	0	0	0	6.643452775	0	0	0	0	0	0	0	0	0	0	0	0	0	0	0	0	0	0	0	0	0	0	0	0	0	0	0	0	0	0
ALDH18A1	0	0	0	0	0	0	0	0	0	0	0	0	0	0	0	0	6.924279338	6.812913423	6.924279338	0	0	0	0	0	0	0	0	0	0	0	0	0	0	0	0	0	0	0	0	0	0	0	0	0	0	0	0	0	0
GLG1	0	0	0	0	0	0	7.361727855	7.414973365	7.38021126	7.230448947	7.255272529	7.113943386	7.591064618	0	0	0	6.322219502	0	0	0	0	0	0	0	0	0	0	0	0	0	0	6.73239384	7.041392725	6.477121399	7.041392725	0	0	0	0	0	0	0	0	0	7.763428001	0	0	7.53147893	0
CCDC47	0	0	0	0	0	0	6.748188105	6.544068168	6.662757926	6.924279338	6.924279338	6.770852085	6.380211423	0	0	0	0	0	0	0	0	0	0	0	0	0	0	0	0	0	0	0	0	0	0	0	0	0	0	0	0	0	0	0	0	0	0	0	0
S100A16	7.000000043	6.919078145	6.95904144	6.591064718	0	0	8.176091262	7.851258355	0	7.982271238	6.361728025	7.518513953	7.491361708	7.653212523	7.653212523	7.591064618	0	0	0	6.414973515	6.204120254	0	0	0	0	0	0	0	0	0	0	7.792391697	8.602059992	7.278753624	7.755874863	7.903089992	0	7.732393768	0	7.954242514	0	0	0	6.838849154	8.113943356	9.079181246	7.414973365	8.95424251	0
FUBP3	0	0	0	0	0	0	0	0	0	0	0	0	0	0	0	0	0	0	0	0	0	0	0	0	0	0	0	0	0	0	0	0	0	0	0	0	0	7.662757841	0	0	0	0	0	0	0	0	0	0	0
RBM14	0	0	0	0	0	0	0	0	0	0	0	0	0	0	0	0	0	0	0	0	0	0	0	0	0	0	0	0	0	0	0	7.278753624	0	0	0	0	0	7.959041397	0	0	0	0	0	0	6.908485072	0	0	0	0
TBCB	0	0	0	0	0	0	0	0	0	0	0	0	0	0	0	0	0	0	0	0	0	0	0	0	0	0	0	0	0	0	0	0	7.230448947	0	7.176091288	0	0	0	0	0	0	0	0	0	0	7.477121269	0	0	0
POFUT1	0	0	0	0	0	0	7.38021126	7.361727855	7.20412001	7.079181282	6.579783711	7.612783867	6.763428068	0	0	0	6.698970091	0	0	0	0	0	0	0	0	0	0	0	0	0	0	0	0	0	0	0	0	0	0	0	0	0	0	0	0	0	0	0	0
SRRM2	0	0	0	0	0	0	0	0	0	0	0	0	0	0	0	0	0	0	0	0	0	0	0	0	0	0	0	0	0	0	0	0	0	0	0	0	0	0	0	0	0	0	0	0	0	0	0	0	0
PTMA	0	0	0	0	0	0	0	0	0	0	0	0	0	0	0	0	0	0	0	0	0	0	0	0	0	0	0	0	0	0	0	0	6.770852085	0	0	0	0	0	0	0	0	0	0	0	7.447158047	8.204119985	7.770852019	7.653212523	0
IMMT	0	0	0	0	0	0	0	0	0	0	0	0	0	0	0	0	6.65321261	6.612783963	6.778151323	0	0	0	0	0	0	0	0	0	0	0	0	0	0	0	0	0	0	0	0	0	0	0	0	0	0	0	0	0	0
PFDN1	0	0	0	0	0	0	0	0	0	0	0	0	0	0	0	0	0	0	0	0	0	0	0	0	0	0	0	0	0	0	0	0	0	0	0	0	0	0	0	0	0	0	0	0	0	0	0	0	0
HMGB3	0	0	0	0	0	0	0	0	0	0	0	0	0	0	0	0	0	0	0	0	0	0	0	0	0	0	0	0	0	0	0	0	0	0	0	0	0	0	0	0	0	0	0	0	0	0	0	0	0
LMNB2	0	0	0	0	0	0	0	0	0	0	0	0	0	0	0	0	0	0	0	0	0	0	0	0	0	0	0	0	0	0	0	0	0	0	0	0	0	0	0	0	0	0	0	0	0	0	0	0	0
BAG2	0	0	0	0	0	0	0	0	0	0	0	0	0	0	0	0	0	0	0	0	0	0	0	0	0	0	0	0	0	0	0	7.301030017	0	0	0	0	0	0	0	0	0	0	0	0	0	0	0	0	0
DTYMK	0	0	0	0	0	0	0	0	0	0	0	0	0	0	0	0	0	0	0	0	0	0	0	0	0	0	0	0	0	0	0	0	0	0	6.67209795	0	0	0	0	0	0	0	0	0	0	7.20412001	6.698970091	0	0
NDUFS1	0	0	0	0	0	0	0	0	0	0	0	0	0	0	0	0	6.812913423	6.785329906	6.763428068	0	0	0	0	0	0	0	0	0	0	0	0	0	0	0	0	0	0	0	0	0	0	0	0	0	0	0	0	0	0
GPD2	0	0	0	0	0	0	0	0	0	0	7.322219315	6.414973515	7.176091288	0	0	0	7.322219315	7.20412001	7.278753624	0	0	0	0	0	0	0	0	0	0	0	0	6.73239384	0	0	0	0	0	0	0	0	0	0	0	0	7.792391697	0	0	0	0
LSS	0	0	0	0	0	0	0	0	0	0	0	0	0	0	0	0	0	0	0	0	0	0	0	0	0	0	0	0	0	0	0	0	0	0	0	0	0	0	0	0	0	0	0	0	0	0	0	0	0
HDGF	0	0	0	0	0	0	0	0	0	0	0	0	0	0	0	0	0	0	0	0	0	0	0	0	0	0	0	0	0	0	0	0	0	0	0	0	0	0	0	0	0	0	0	0	0	7.462398013	0	0	0
PSMD4	0	0	0	0	0	0	0	0	0	0	0	0	0	0	0	0	0	0	0	0	0	0	0	0	0	0	0	0	0	0	0	0	0	0	6.531479045	0	0	7.556302513	0	0	0	7.38021126	0	0	0	0	7.113943386	0	0
MANF	0	0	0	0	0	0	6.770852085	6.908485072	6.919078145	6.740362768	6.740362768	6.518514071	6.763428068	0	0	0	0	0	0	0	0	0	0	0	0	0	0	0	0	0	0	0	0	0	0	0	0	0	0	0	0	0	0	0	0	0	0	0	0
PALLD	0	0	0	0	0	0	0	0	0	0	0	0	0	0	0	0	0	0	0	0	0	0	0	0	0	0	0	0	0	0	0	0	0	0	0	0	0	0	0	0	0	0	0	0	0	0	0	7.99122608	8.556302502
CELF1	0	0	0	0	0	0	0	0	0	0	0	0	0	0	0	0	0	0	0	0	0	0	0	0	0	0	0	0	6.612783963	7.113943386	0	0	0	0	0	0	0	0	0	0	0	0	0	0	0	0	0	8.041392689	8.255272508
CHMP5	0	0	0	7.38021126	0	0	0	0	0	0	0	0	0	0	0	0	0	0	0	0	0	0	0	0	0	0	0	0	0	0	0	7.505149992	7.919078098	6.778151323	7.740362697	0	0	0	0	7.819543942	0	0	7.579783608	0	0	0	8.176091262	7.662757841	0
RRBP1	0	0	0	0	0	0	0	0	0	0	0	0	0	0	0	0	0	0	0	0	0	0	0	0	0	0	0	0	0	0	0	0	0	0	0	0	0	0	0	0	0	0	0	0	0	0	0	0	0
DENR	0	0	0	0	0	0	0	0	0	0	0	0	0	0	0	0	0	0	0	0	0	0	0	0	0	0	0	0	0	0	0	0	0	0	0	0	0	0	0	0	0	0	0	0	0	0	0	0	0
AIP	0	0	0	0	0	0	0	0	0	0	0	0	0	0	0	0	0	0	0	0	0	0	0	0	0	0	0	0	0	0	0	0	0	0	5.707571028	0	0	0	0	0	0	0	0	0	0	0	7.342422701	7.397940026	0
TIPRL	0	0	0	0	0	0	0	0	0	0	0	0	0	0	0	0	0	0	0	0	0	0	0	0	0	0	0	0	0	0	0	0	0	0	0	0	0	0	0	0	0	0	0	0	0	7.591064618	0	0	0
RANBP2	0	0	0	0	0	0	0	0	0	0	0	0	0	0	0	0	0	0	0	0	0	0	0	0	0	0	0	0	0	0	0	0	0	0	0	0	0	0	0	0	0	0	0	0	0	0	0	0	7.53147893
PTPN11	0	0	0	0	0	0	6.204120254	6.361728025	0	0	0	0	0	0	0	0	0	6.447158186	0	0	0	0	0	0	0	0	0	6.230449177	6.954242558	0	0	0	0	0	6.230449177	0	0	7.447158047	7.278753624	7.724275878	0	0	6.707570261	0	6.908485072	7.544068057	0	0	6.968482995
FHL2	0	0	0	0	0	0	6.322219502	0	0	0	0	0	0	0	0	0	0	0	0	0	0	0	0	0	0	0	0	0	0	0	0	7.491361708	7.342422701	0	7.447158047	0	0	0	0	0	0	0	0	0	0	7.491361708	0	7.301030017	0
TOMM34	0	0	0	0	0	0	0	0	0	0	0	0	0	0	0	0	0	0	0	0	0	0	0	0	0	0	0	0	0	0	0	0	0	0	0	0	0	0	0	0	0	0	0	0	0	0	6.662757926	0	0
SUCLG2	0	0	0	0	0	0	0	0	0	0	0	0	0	0	0	0	6.531479045	0	0	0	0	0	0	0	0	0	0	0	0	0	0	0	0	0	0	0	0	0	0	0	0	0	0	0	0	0	0	0	0
CDC5L	0	0	0	0	0	0	0	0	0	0	0	0	0	0	0	0	0	0	0	0	0	0	0	0	0	0	0	0	0	0	0	0	0	0	0	0	0	0	0	0	0	0	0	0	0	0	0	0	7.397940026
G3BP2	0	0	0	0	0	0	0	0	0	0	0	0	0	0	0	0	0	0	0	0	0	0	0	0	0	0	6.79239176	0	0	6.556302621	0	0	0	0	0	0	0	0	0	0	0	0	0	0	0	0	0	8.176091262	8.531478918
USP10	0	0	0	0	0	0	0	0	0	0	0	0	0	0	0	0	0	0	0	0	0	0	0	0	0	0	0	0	0	0	0	0	0	0	0	0	0	0	0	0	0	0	0	0	0	0	0	0	0
PPM1G	0	0	0	0	0	0	0	0	0	0	0	0	0	0	0	0	0	0	0	0	0	0	0	0	0	0	0	0	0	0	0	0	0	0	0	0	0	0	0	0	0	0	0	0	0	0	0	0	8.000000004
EIF3J	0	0	0	0	0	0	0	0	0	0	0	0	0	0	0	0	0	0	0	0	0	0	0	0	0	0	0	0	0	0	0	0	0	0	0	0	0	0	0	0	0	0	0	0	0	0	6.612783963	0	8.041392689
PDE12	0	0	0	0	0	0	0	0	0	0	0	0	0	0	0	0	0	0	0	0	0	0	0	0	0	0	0	0	0	0	0	0	0	0	0	0	0	0	0	0	0	0	0	0	0	0	0	0	0
FUBP1	0	0	0	0	0	0	0	0	0	0	0	0	0	0	0	0	0	0	0	0	0	0	0	0	0	0	0	0	0	0	0	0	0	0	0	0	0	0	0	0	0	0	0	0	0	0	0	0	0
FAF2	0	0	0	0	0	0	0	0	6.380211423	0	0	0	0	0	0	0	0	0	0	0	0	0	0	0	0	0	0	0	0	0	0	6.99122612	0	0	0	0	0	0	0	0	0	0	0	0	0	0	0	0	0
SPAG9	0	0	0	0	0	0	0	0	0	0	0	0	0	0	0	0	0	0	0	0	0	0	0	0	0	0	0	0	0	0	0	0	0	0	0	0	0	0	0	0	0	0	0	0	0	0	6.929418977	7.342422701	7.591064618
ZNF185	0	0	0	0	0	0	0	0	0	0	0	0	0	0	0	0	0	0	0	0	0	0	0	0	0	0	0	0	0	0	0	0	0	0	0	0	0	0	0	0	0	0	0	0	0	0	0	0	0
AHNAK2	0	0	0	0	0	0	0	0	0	0	0	0	0	0	0	0	0	0	0	0	0	0	0	0	0	0	0	0	0	0	0	0	0	0	0	0	0	0	0	0	0	0	0	0	0	0	0	0	0
LDLR	0	0	0	0	0	0	6.556302621	6.681241328	0	6.361728025	0	0	0	0	0	0	0	0	0	0	0	0	0	0	0	0	0	0	0	0	0	0	0	0	0	0	0	0	0	7.518513953	0	0	0	0	0	0	0	0	0
NNT	0	0	0	0	0	0	0	0	0	0	0	0	0	0	0	0	6.690196169	6.755874932	6.73239384	0	0	0	0	0	0	0	0	0	0	0	0	0	0	0	0	0	0	0	0	0	0	0	0	0	0	0	0	0	0
LAMC2	0	0	0	0	0	0	6.785329906	6.724275952	6.6020601	6.716003427	0	6.380211423	0	0	0	0	0	0	0	0	0	0	0	0	0	0	0	0	0	0	0	0	0	0	0	0	0	0	0	0	0	0	0	0	6.6020601	0	0	0	0
PSMD9	0	0	0	0	0	0	0	0	0	0	0	0	0	0	0	0	0	0	0	0	0	0	0	0	0	0	0	0	0	0	0	0	0	0	0	0	0	0	0	0	0	0	0	0	0	0	5.908485555	0	0
NDUFS3	0	0	0	0	0	0	0	0	0	0	0	0	0	0	0	0	6.716003427	6.832508977	6.707570261	0	0	0	0	0	0	0	0	0	0	0	0	0	0	0	0	0	0	0	0	0	0	0	0	0	0	0	0	0	0
ACAA2	0	0	0	0	0	0	0	0	0	0	0	0	0	0	0	0	0	0	0	0	0	0	0	0	0	0	0	0	0	0	0	0	0	0	0	0	0	0	0	0	0	0	0	0	0	0	0	0	0
NIPSNAP1	0	0	0	0	0	0	0	0	0	0	0	6.322219502	0	0	0	0	6.633468557	6.477121399	0	0	0	0	0	0	0	0	0	0	0	0	0	0	0	0	0	0	0	0	0	0	0	0	0	0	0	0	0	0	0
SFXN1	0	0	0	0	0	0	0	0	0	0	6.982271278	6.838849154	6.698970091	0	0	0	0	6.763428068	0	0	0	0	0	0	0	0	0	0	0	0	0	0	0	0	0	0	0	0	0	0	0	0	0	0	0	0	0	0	0
LETM1	0	0	0	0	0	0	0	0	0	0	0	6.662757926	0	0	0	0	6.903090041	6.832508977	6.85125841	0	0	0	0	0	0	0	0	0	0	0	0	0	0	0	0	0	0	0	0	0	0	0	0	0	0	0	0	0	0
DLD	0	0	0	0	0	0	6.579783711	6.397940182	0	0	6.977723651	0	6.826074868	0	0	0	7.447158047	7.000000043	7.278753624	0	0	0	0	0	0	0	0	0	0	0	0	6.04139308	0	0	0	0	0	0	0	0	0	0	0	0	0	0	0	0	0
DSG2	0	0	0	0	0	0	6.531479045	5.954242992	0	6.447158186	7.079181282	6.662757926	6.544068168	0	6.431363925	0	6.342422878	0	0	0	0	0	0	0	0	0	0	0	0	0	0	8.07918125	7.505149992	7.799340556	7.414973365	0	0	0	0	0	0	0	0	0	7.633468466	8.716003344	0	7.690196089	0
PGAM5	0	0	0	0	0	0	0	0	0	0	0	0	0	0	0	0	0	0	0	0	0	0	0	0	0	0	0	0	0	0	0	0	0	0	0	0	0	0	0	0	0	0	0	0	0	7.113943386	0	0	0
AIFM1	0	0	0	0	0	0	0	0	0	0	0	0	0	0	0	0	7.041392725	6.929418977	7.000000043	0	0	0	0	0	0	0	0	0	0	0	0	0	0	0	0	0	0	0	0	0	0	0	0	0	0	0	0	0	0
FDXR	0	0	0	0	0	0	0	0	0	0	0	0	0	0	0	0	7.322219315	7.079181282	7.20412001	0	0	0	0	0	0	0	0	0	0	0	0	0	0	0	0	0	0	0	0	0	0	0	0	0	0	0	0	0	0
GRPEL1	0	0	0	0	0	0	0	0	0	0	0	0	0	0	0	0	7.000000043	7.041392725	6.643452775	0	0	0	0	0	0	0	0	0	0	0	0	0	0	0	0	0	0	0	0	0	0	0	0	0	7.20412001	0	0	0	0
ACAD9	0	0	0	0	0	0	0	0	0	0	0	0	0	0	0	0	0	6.176091549	6.146128346	0	0	0	0	0	0	0	0	0	0	0	0	0	0	0	0	0	0	0	0	0	0	0	0	0	0	0	0	0	0
FDFT1	0	0	0	0	0	0	7.146128067	6.954242558	6.414973515	6.556302621	7.568201736	7.43136378	7.505149992	0	0	0	0	0	0	0	0	0	0	0	0	0	0	0	0	0	0	0	0	0	0	0	0	0	0	0	0	0	0	0	0	0	0	8.913813853	0
CAPRIN1	0	0	0	0	0	0	0	0	0	0	0	0	0	0	0	0	0	0	0	0	0	0	0	0	0	0	0	0	0	0	0	0	0	0	0	0	0	0	0	0	0	0	0	0	0	0	0	7.857332502	0
IDH3B	0	0	0	0	0	0	0	0	0	0	0	0	0	0	0	0	0	0	0	0	0	0	0	0	0	0	0	0	0	0	0	0	0	0	0	0	0	0	0	0	0	0	0	0	0	0	0	0	0
LAMB3	0	0	0	0	0	0	0	6.322219502	6.447158186	0	0	0	0	0	0	0	0	0	0	0	0	0	0	0	0	0	0	0	0	0	0	0	0	0	0	0	0	0	0	0	0	0	0	0	7.176091288	0	0	0	0
DNAJC7	0	0	0	0	0	0	0	0	0	0	0	0	0	0	0	0	0	0	0	0	0	0	0	0	0	0	6.770852085	0	0	0	0	0	0	0	6.113943686	0	0	0	0	0	0	0	0	0	6.204120254	0	7.079181282	0	0
SPATS2L	0	0	0	0	0	0	0	0	0	0	0	0	0	0	0	0	0	0	0	0	0	0	0	0	0	0	0	0	0	0	0	0	0	0	0	0	0	0	0	0	0	0	0	0	0	0	0	0	0
YTHDF2	0	0	0	0	0	0	0	0	0	0	0	0	0	0	0	0	0	0	0	0	0	0	0	0	0	0	0	0	0	0	0	0	0	0	0	0	0	0	0	0	0	0	0	0	0	0	0	0	0
TRIP10	0	0	0	0	0	0	0	0	0	0	0	0	0	0	0	0	0	0	0	0	0	0	0	0	0	0	0	0	0	0	0	0	0	0	0	0	0	0	0	6.690196169	0	0	0	0	0	7.903089992	0	0	0
EDF1	0	0	0	0	0	0	0	0	0	0	0	0	0	0	0	0	0	0	0	0	0	0	0	0	0	0	0	0	0	0	0	0	0	0	0	0	0	0	0	0	0	0	0	0	0	7.97772361	0	0	0
PLIN3	0	0	0	0	0	0	0	0	0	0	0	0	0	0	0	0	0	0	0	0	0	0	0	0	0	0	0	0	0	0	0	0	0	7.000000043	7.041392725	0	0	0	0	7.491361708	0	0	0	0	0	0	6.9731279	0	0
BAG3	0	0	0	0	0	0	0	0	0	0	0	0	0	0	0	0	0	0	0	0	0	0	0	0	0	0	0	0	0	0	0	7.447158047	0	7.447158047	7.255272529	0	0	7.397940026	0	0	0	0	0	0	0	0	0	7.361727855	0
PABPN1	0	0	0	0	0	0	0	0	0	0	0	0	0	0	0	0	0	0	0	0	0	0	0	0	0	0	0	0	0	0	0	0	0	0	0	0	0	0	0	0	0	0	0	0	0	0	0	0	0
SDF4	0	0	0	0	0	0	7.041392725	7.20412001	7.176091288	6.995635238	6.892094658	7.041392725	6.799340618	0	0	0	0	0	0	0	0	0	0	0	0	0	0	0	0	0	0	0	0	0	0	0	0	0	0	0	0	0	0	0	6.982271278	0	0	0	0
ATOX1	0	0	0	0	0	0	0	0	0	0	0	0	0	0	0	0	0	0	0	0	0	0	0	0	0	0	0	0	0	0	0	0	7.113943386	0	0	0	0	0	0	0	0	0	0	0	0	7.838849097	7.826074809	0	0
TBCA	0	0	0	0	0	0	0	0	0	0	0	0	0	0	0	0	0	0	0	0	0	0	0	0	0	0	0	0	0	0	0	7.278753624	7.113943386	0	7.477121269	0	0	0	0	0	0	0	0	0	7.041392725	8.113943356	7.633468466	0	0
DUT	0	0	0	0	0	0	0	0	0	0	0	0	0	0	0	0	0	0	0	0	0	0	0	0	0	0	0	0	0	0	0	0	0	0	0	0	0	0	0	0	0	0	0	0	0	0	0	0	0
NASP	0	0	0	0	0	0	0	0	0	0	0	0	0	0	0	0	0	0	0	0	0	0	0	0	0	0	0	0	0	0	0	0	0	0	0	0	0	0	0	0	0	0	0	0	0	0	0	0	0
SUMO1	0	0	0	0	0	0	0	0	0	0	0	0	0	0	0	0	0	0	0	0	0	0	0	0	0	0	0	0	0	0	0	0	0	0	0	0	0	0	0	0	0	0	0	0	0	0	0	0	0
PDAP1	6.556302621	0	0	0	0	0	0	0	0	0	0	0	0	0	0	0	0	0	0	0	0	0	0	0	0	0	0	0	0	0	0	0	0	0	6.322219502	0	0	0	0	0	0	0	0	0	0	0	7.079181282	0	0
BTF3	0	0	0	0	0	0	0	0	0	0	0	0	0	0	6.755874932	6.643452775	0	0	0	0	0	0	0	0	0	0	0	0	0	0	0	0	0	0	0	0	0	0	0	0	0	0	0	0	0	0	0	0	0
PPIL1	0	0	0	0	0	0	0	0	0	0	0	0	0	0	0	0	0	0	0	0	0	0	0	0	0	0	0	0	0	0	0	0	0	0	0	0	0	0	0	0	0	0	0	0	0	0	0	0	0
SRSF9	0	0	0	0	0	0	0	0	0	0	0	0	0	0	0	0	0	0	0	0	0	0	0	0	0	0	0	0	0	0	0	0	0	0	0	0	0	7.662757841	0	0	0	0	0	0	0	0	0	8.000000004	7.732393768
SF1	0	0	0	0	0	0	0	0	0	0	0	0	0	0	0	0	0	0	0	0	0	0	0	0	0	0	0	0	0	0	0	0	0	0	0	0	0	0	0	0	0	0	0	0	0	0	0	0	0
DHCR7	0	0	0	0	0	0	7.477121269	6.623249394	6.531479045	6.707570261	6.681241328	6.73239384	6.903090041	0	0	0	0	0	0	0	0	0	0	0	0	0	0	0	0	0	0	0	7.38021126	0	0	0	0	0	0	0	0	0	0	0	0	0	0	0	0
ATXN2L	0	0	0	0	0	0	0	0	0	0	0	0	0	0	0	0	0	0	0	0	0	0	0	0	0	0	0	0	0	0	0	0	0	0	0	0	0	0	0	0	0	0	0	0	0	0	0	0	0
CDV3	0	0	0	0	0	0	0	0	0	0	0	0	0	0	0	0	0	0	0	0	0	0	0	0	0	0	0	0	0	0	0	0	0	0	0	0	0	0	0	0	0	0	0	0	0	0	0	0	0
DARS2	0	0	0	0	0	0	6.518514071	0	6.176091549	0	6.176091549	5.623250324	5.977724062	0	0	0	5.944483166	0	0	0	0	0	0	0	0	0	0	0	0	0	0	0	0	0	0	0	0	0	0	0	0	0	0	0	0	0	0	0	0
DDX42	0	0	0	0	0	0	0	0	0	0	0	0	0	0	0	0	0	0	0	0	0	0	0	0	0	0	0	0	0	0	0	0	0	0	0	0	0	0	0	0	0	0	0	0	0	0	0	0	0
UQCRH	0	0	0	0	0	0	0	0	0	0	0	0	0	0	0	0	0	0	0	0	0	0	0	0	0	0	0	0	0	0	0	0	0	0	0	0	0	0	0	0	0	0	0	0	0	0	0	0	0
TFAM	0	0	0	0	0	0	0	0	0	0	0	0	0	0	0	0	0	0	0	0	0	0	0	0	0	0	0	0	0	0	0	0	0	0	0	0	0	0	0	0	0	0	0	0	0	0	0	0	0
TNKS1BP1	0	0	0	0	0	0	0	0	0	0	0	0	0	0	0	0	0	0	0	0	0	0	0	0	0	0	0	0	0	0	0	0	0	0	7.230448947	0	0	0	0	0	0	0	0	0	0	0	0	0	0
TTC1	0	0	0	0	0	0	0	0	0	0	0	0	0	0	0	0	0	0	0	0	0	0	0	0	0	0	0	0	0	0	0	0	0	0	0	0	0	0	0	0	0	0	0	0	0	0	0	0	0
RPRD1B	0	0	0	0	0	0	0	0	0	0	0	0	0	0	0	0	0	0	0	0	0	0	0	0	0	0	0	0	0	0	0	0	0	0	0	0	0	0	0	0	0	0	0	0	0	0	0	0	0
RBM3	0	0	0	0	0	0	0	0	0	0	0	0	0	0	0	0	0	0	0	0	0	0	0	0	0	0	0	0	0	0	0	0	0	0	0	0	0	0	0	0	8.322219297	0	0	0	0	0	0	0	0
DNAJC9	0	0	0	0	0	0	0	0	0	0	0	0	0	0	0	0	0	0	0	0	0	0	0	0	0	0	0	0	0	0	0	0	0	0	0	0	0	0	0	0	0	0	0	0	0	0	0	7.176091288	0
STAU1	0	0	0	0	0	0	0	0	0	0	0	0	0	0	0	0	0	0	0	0	0	0	0	0	0	0	0	0	0	0	0	0	0	0	0	0	0	0	0	0	0	0	0	0	0	0	0	0	0
DNAJC8	0	0	0	0	0	0	0	0	0	0	0	0	0	0	0	0	0	0	0	0	0	0	0	0	0	0	0	0	0	0	0	0	0	0	0	0	0	0	0	0	0	0	0	0	0	0	0	0	0
MRPS22	0	0	0	0	0	0	0	0	0	0	0	0	0	0	0	0	0	0	0	0	0	0	0	0	0	0	0	0	0	0	0	0	0	0	0	0	0	0	0	0	0	0	0	0	0	0	0	0	0
PNPT1	0	0	0	0	0	0	0	0	0	0	0	0	0	0	0	0	0	0	0	0	0	0	0	0	0	0	0	0	0	0	0	0	0	0	0	0	0	0	0	0	0	0	0	0	0	0	0	0	0
SLIRP	0	0	0	0	0	0	0	0	0	0	0	0	0	0	0	0	0	0	0	0	0	0	0	0	0	0	0	0	0	0	0	0	0	0	0	0	0	0	0	0	0	0	0	0	0	0	0	0	0
TIMM44	0	0	0	0	0	0	0	0	0	0	0	0	0	0	0	0	0	6.544068168	0	0	0	0	0	0	0	0	0	0	0	0	0	0	0	0	0	0	0	0	0	0	0	0	0	0	0	0	0	0	0
[truncated: 236 more columns]
