# Supplementary material for: A novel machine learning algorithm selects proteome signature to specifically identify cancer exosomes
Source: eLife. 2024 Mar 26;12:RP90390. doi: 10.7554/eLife.90390 (PMC10965221; doi:10.7554/eLife.90390)
Supplement: Figure 2—source data 3. [file elife-90390-fig2-data3.csv]

gene	pos_all	pos_cancer	pos_control	#total 285/cancer 228/control 57
GNB2	243	207	36
SLC3A2	245	211	34
LGALS3BP	231	179	52
TFRC	267	218	49
GNAI2	275	220	55
ATP1A1	275	221	54
KRT18	202	157	45
S100A6	240	185	55
PFN1	280	223	57
GNAI3	271	217	54
HSPA5	284	227	57
HSP90B1	281	225	56
ANPEP	153	105	48
EZR	281	224	57
CD44	238	190	48
MSN	280	223	57
STOM	261	206	55
YWHAQ	283	226	57
YWHAB	282	225	57
SFN	261	205	56
S100A11	252	200	52
PRDX2	228	187	41
RDX	276	219	57
YWHAG	281	224	57
YWHAE	283	226	57
GNB1	281	224	57
RPS27A	285	228	57
YWHAZ	284	227	57
CLTC	284	227	57
YWHAH	269	213	56
CD47	178	145	33
CTTN	149	119	30
COL6A1	267	211	56
GSN	235	198	37
CFL1	280	224	56
S100A10	216	166	50
B2M	195	172	23
PPIA	283	226	57
BASP1	215	168	47
SLC1A5	248	206	42
EHD1	277	221	56
RAB10	278	221	57
RAB14	271	214	57
RAB1A	275	218	57
RAB35	280	223	57
RAB1B	276	219	57
TLN1	281	224	57
TUBA4A	278	222	56
FLNA	278	222	56
SDCBP	279	223	56
AHCYL1	249	196	53
WDR1	277	221	56
FLNB	252	212	40
PGK1	279	223	56
ASS1	250	194	56
COL1A1	181	149	32
ALDOA	279	223	56
GAPDH	282	225	57
ENO1	283	226	57
GPI	251	214	37
TUBB	282	225	57
HSP90AA1	283	226	57
THBS1	280	223	57
HSP90AB1	284	227	57
LTA4H	226	174	52
IGF2R	226	185	41
EEF2	283	226	57
AKR1A1	253	197	56
PKM	285	228	57
AKR1B1	236	181	55
VCL	259	206	53
ACO1	232	180	52
AHCY	280	224	56
PSMA4	227	176	51
MAPK1	237	185	52
BLVRB	232	188	44
GDI1	252	201	51
MAT2A	231	180	51
MYH9	280	224	56
TAGLN2	275	219	56
GDI2	280	224	56
PGD	279	222	57
ADK	268	213	55
TPI1	280	224	56
PSMA6	221	166	55
TUBB4B	282	225	57
CAP1	276	219	57
SLC7A5	231	180	51
EEF1A2	264	211	53
TRAP1	245	193	52
ILK	264	211	53
TUBB3	266	209	57
COTL1	247	198	49
FLNC	250	197	53
PTGES3	269	215	54
TUBA1C	283	226	57
TUBB6	240	204	36
PSMD13	265	210	55
RAP1B	280	223	57
COL1A2	185	152	33
LDHB	278	221	57
MYL6	272	217	55
CLIC1	279	222	57
ACTN4	274	217	57
LDHA	283	226	57
ITGB1	248	214	34
ENO2	233	181	52
COL6A3	233	180	53
ACTN1	276	219	57
UBA1	275	219	56
MYH10	269	214	55
PGM1	259	203	56
ACLY	279	222	57
VCP	261	205	56
EIF4A1	280	224	56
RHOA	278	222	56
TPM4	167	145	22
PSMD2	269	215	54
PDCD6IP	279	222	57
PCYOX1	123	96	27
CLIC4	271	216	55
CD9	253	201	52
CAPZB	258	207	51
ACTR3	268	212	56
ARHGDIB	137	113	24
FABP5	177	144	33
ITGA6	209	179	30
SLC9A3R1	175	137	38
ARPC1B	224	174	50
ARPC2	232	179	53
ARPC3	242	190	52
ARPC5	181	143	38
PNP	218	169	49
CAT	232	189	43
ANXA1	235	184	51
CAPNS1	243	188	55
GSTP1	260	205	55
CNP	244	194	50
TXN	241	192	49
PRKAR1A	207	165	42
RALB	235	185	50
LCP1	170	119	51
PLS3	254	200	54
NT5E	214	165	49
S100A4	138	101	37
TKT	258	201	57
GNA11	222	171	51
PRDX5	220	176	44
SERPINB1	142	109	33
CORO1A	207	173	34
BSG	247	199	48
VASP	238	190	48
RAB5C	272	217	55
ARHGDIA	191	166	25
CAPZA1	262	210	52
CDC42	275	219	56
DSTN	270	216	54
ACTR2	230	196	34
RHOG	246	195	51
PSME1	204	159	45
LASP1	167	135	32
ZYX	153	121	32
TWF2	172	136	36
CYFIP1	257	204	53
ARPC1A	198	148	50
CNN2	178	145	33
PARK7	240	192	48
SH3BGRL3	169	129	40
CORO1C	259	208	51
SRI	233	181	52
CYCS	113	88	25
EIF4E	227	175	52
HNRNPH1	217	170	47
MYO1B	215	167	48
GANAB	248	194	54
NPEPPS	256	200	56
NAP1L1	267	214	53
NACA	156	128	28
PSMA3	188	139	49
HDLBP	143	112	31
P4HB	239	186	53
RPS3	204	173	31
CCT8	260	206	54
DDX5	171	138	33
PSMB3	177	130	47
PPL	108	75	33
PDLIM1	189	155	34
MYO1C	217	186	31
PSMD12	259	204	55
PSMA7	232	177	55
XPO1	248	196	52
PFAS	209	172	37
EIF3H	159	122	37
TXNL1	186	136	50
UGDH	262	214	48
PDCD6	263	208	55
VPS26A	141	110	31
IDH1	261	205	56
PGLS	192	147	45
IPO7	247	195	52
AP2A1	222	170	52
DDAH2	176	146	30
HPRT1	183	137	46
LMNA	152	124	28
HSPB1	239	186	53
RPN1	171	140	31
RPN2	148	121	27
SLC25A5	178	150	28
EIF2S1	195	148	47
PYGL	268	212	56
CAPN1	190	145	45
VIM	245	192	53
ANXA5	271	215	56
ANXA4	235	183	52
HSPD1	234	182	52
PYGB	269	213	56
LAMP1	206	171	35
G6PD	224	192	32
MTHFD1	265	217	48
PABPC1	260	212	48
SLC25A6	163	135	28
IMPDH2	230	187	43
CKB	227	179	48
XRCC6	197	166	31
RNH1	169	139	30
TPT1	234	191	43
APEH	132	102	30
MIF	225	176	49
FDPS	143	116	27
JUP	225	174	51
UCHL3	155	118	37
RPS2	271	216	55
DSP	147	111	36
CBR1	262	208	54
GOT1	147	113	34
LGALS3	176	132	44
TCP1	274	219	55
ARF4	273	218	55
ANXA7	245	193	52
PSMB1	200	151	49
GSTM3	215	166	49
VDAC1	131	125	6
PCMT1	219	185	34
PPIB	208	171	37
EEF1B2	235	184	51
MPST	136	109	27
PSMA1	200	148	52
PSMA2	202	150	52
PTBP1	223	182	41
EEF1G	275	219	56
CALR	244	195	49
CANX	195	154	41
PSMA5	229	176	53
PSMB4	172	122	50
PSMB6	162	114	48
PSMB5	186	138	48
S100A2	132	88	44
PRDX6	258	209	49
CMPK1	176	140	36
PEBP1	247	196	51
PDIA3	271	217	54
PPP2R1A	272	216	56
STIP1	229	193	36
KIF5B	211	162	49
PHB	149	123	26
RPL22	196	164	32
SERPINB5	140	97	43
TALDO1	218	172	46
ATP6V1A	231	177	54
HSPA9	195	148	47
EIF4A3	219	168	51
RPL3	222	178	44
CAPG	143	112	31
CCT6A	272	215	57
MDH1	249	200	49
MDH2	249	196	53
PAFAH1B1	233	181	52
USP5	246	194	52
IQGAP1	275	222	53
CAPZA2	232	184	48
PREP	182	144	38
CCT5	271	217	54
IDH2	191	140	51
ALDH9A1	259	204	55
FASN	280	223	57
CCT3	277	221	56
SRP9	138	113	25
PSMB2	180	132	48
TMED10	189	146	43
DNM2	247	199	48
CCT4	276	221	55
RAB7A	277	222	55
HSD17B4	144	112	32
HNRNPM	176	139	37
COPB1	219	169	50
SEC24C	123	91	32
NAPA	229	183	46
HNRNPH2	180	137	43
EIF6	185	145	40
RAB2A	260	206	54
NUTF2	228	174	54
HNRNPK	270	217	53
RPS8	252	208	44
RPS15A	199	154	45
RPS11	228	178	50
SNRPD3	179	143	36
ARF6	232	184	48
RPS4X	264	209	55
RAN	244	209	35
RPL23	193	149	44
RPL11	221	169	52
PPP2R2A	191	139	52
DYNLL1	248	195	53
GSTO1	208	162	46
ERH	151	123	28
SRSF3	168	132	36
PFKP	257	202	55
NUCB1	140	100	40
RPL6	218	181	37
GLO1	248	199	49
PRDX1	275	219	56
C1QBP	179	151	28
CKAP4	147	121	26
DHX9	214	170	44
AHNAK	204	161	43
AP1B1	229	179	50
PRDX4	236	182	54
BLMH	143	113	30
TTLL12	167	126	41
DYNC1H1	276	221	55
EIF4A2	250	198	52
KPNB1	276	221	55
PLEC	193	148	45
PPA1	241	191	50
PCBP1	266	212	54
MAPRE1	218	178	40
FSCN1	227	171	56
CD109	173	127	46
RPS21	136	111	25
DDX1	215	165	50
LRRC59	138	111	27
OTUB1	252	197	55
PGM2	170	127	43
PDLIM5	167	127	40
CNDP2	235	191	44
PSMB7	147	103	44
S100A13	190	149	41
PHB2	164	137	27
CCT7	269	214	55
ERP44	217	165	52
TMED9	149	121	28
NIT2	124	98	26
PHPT1	176	136	40
OLA1	240	189	51
DPP3	180	166	14
NUDT5	137	114	23
RAB21	237	183	54
PA2G4	232	185	47
VDAC3	149	123	26
RTCB	210	161	49
RPS24	219	173	46
RPL13A	224	182	42
RPSA	271	216	55
VDAC2	171	145	26
EPPK1	179	138	41
DDX17	167	130	37
PHGDH	267	213	54
RPS14	193	147	46
CTSD	219	169	50
CTNNB1	226	174	52
GSR	140	114	26
HSPE1	177	148	29
TGFBI	240	186	54
UGP2	246	193	53
PCK2	115	83	32
SNAP23	159	127	32
EPB41L2	180	155	25
ADA	95	72	23
CTNNA1	228	178	50
RAP2B	224	177	47
EHD4	268	214	54
PACSIN2	191	146	45
RAP2C	226	182	44
CAD	191	175	16
PSMC5	208	177	31
CPNE3	206	160	46
FLOT1	261	216	45
TGM2	142	112	30
PSMC2	248	194	54
ANXA11	246	195	51
PSMD7	241	188	53
RAD23B	141	115	26
PRPS1	205	172	33
PSMC1	252	201	51
PSMC6	251	200	51
CCT2	274	219	55
DCTN2	144	114	30
FLOT2	265	216	49
PSMD6	236	183	53
PSMD1	229	178	51
CPNE1	201	165	36
RUVBL2	205	162	43
PSMC3	246	191	55
SOD1	179	148	31
RPS17	173	133	40
RALA	232	183	49
GRB2	174	142	32
ELAVL1	127	100	27
HNRNPAB	179	135	44
ANXA3	114	98	16
ANXA6	233	193	40
APMAP	146	116	30
ESD	192	149	43
TPP1	112	81	31
RPLP2	250	200	50
CDK1	219	177	42
APRT	211	162	49
LGALS1	250	198	52
TOP1	172	144	28
XRCC5	212	179	33
PFKL	263	209	54
NCL	183	150	33
HK1	173	139	34
ACP1	194	156	38
HMGB2	112	86	26
LAP3	208	156	52
ERP29	144	117	27
ATIC	276	219	57
NAMPT	167	133	34
PSMC4	244	190	54
COPA	215	164	51
SUB1	147	120	27
CSE1L	252	203	49
MTPN	238	189	49
ACTR1A	239	185	54
RPL15	246	199	47
PPP1CA	271	218	53
PPP1CB	267	214	53
RPL7A	252	207	45
HNRNPU	204	153	51
MVP	244	193	51
HMGB1	172	142	30
VAT1	231	179	52
VPS29	180	135	45
DBNL	152	121	31
HNRNPC	234	191	43
HNRNPDL	197	148	49
RPS3A	187	159	28
CSRP1	181	132	49
SRSF2	137	110	27
PSMD14	208	159	49
BANF1	242	207	35
SSB	172	126	46
CTSB	157	117	40
UQCRC2	106	100	6
RPL13	206	164	42
DEK	128	104	24
RPL5	231	180	51
CRIP1	106	84	22
RPL23A	166	135	31
RPS6	200	164	36
ACACA	126	101	25
PAK2	194	154	40
CBX3	141	114	27
SRSF7	134	107	27
LRRFIP1	120	94	26
ARHGEF2	110	89	21
PRMT5	179	136	43
CLTA	184	149	35
CLTB	153	117	36
SPTBN1	191	146	45
EHD2	247	193	54
ITGA2	203	170	33
CLINT1	84	79	5
NAP1L4	198	153	45
PAICS	258	206	52
CTNND1	195	165	30
DKC1	119	96	23
DNAJA2	216	172	44
RRAS	191	141	50
ADH5	260	205	55
CAPN2	215	169	46
COPB2	197	147	50
GFPT1	258	205	53
TARDBP	143	110	33
AIMP2	222	172	50
PDLIM7	127	99	28
GRHPR	164	130	34
DPYSL2	239	183	56
PRMT1	211	162	49
IPO5	233	182	51
COPE	137	108	29
USO1	225	175	50
PMPCB	113	77	36
SF3B1	159	122	37
NQO1	200	151	49
ALDH1B1	125	81	44
RPS9	198	151	47
ALDH1A3	158	109	49
PMPCA	122	90	32
SF3B3	150	115	35
FAM98B	99	76	23
SND1	243	192	51
BZW1	234	188	46
EML4	136	97	39
FARSB	178	135	43
RUVBL1	233	185	48
EIF5B	174	141	33
BCAM	133	99	34
CHMP4B	205	159	46
TMED7	155	122	33
DDX46	137	109	28
SNX3	157	116	41
ATP1B3	219	174	45
MARCKS	245	194	51
DLST	155	121	34
DNM1L	230	180	50
FKBP1A	187	145	42
VAMP3	155	114	41
STAT3	190	147	43
VTA1	195	152	43
CSTB	181	141	40
NPC2	111	86	25
STXBP3	182	141	41
UBE2N	222	177	45
SUMO2	151	120	31
DIAPH1	184	144	40
AKR1C1	194	147	47
ATP2B4	227	177	50
ATP2A2	156	128	28
ABCE1	196	150	46
DDX39B	240	186	54
HNRNPL	213	164	49
ASNS	214	167	47
UBE2L3	127	95	32
NCKAP1	202	160	42
CD2AP	161	132	29
RTN4	123	115	8
PFDN6	125	99	26
AKR7A2	162	127	35
PDIA6	213	180	33
CORO1B	228	184	44
TMOD3	131	105	26
PSME2	185	146	39
UBA6	198	148	50
GPS1	141	118	23
BZW2	191	153	38
DCTN1	191	143	48
EEF1D	229	181	48
SEC23A	164	122	42
TSG101	260	210	50
ATL3	134	112	22
METAP2	73	67	6
SMARCC2	104	80	24
APEX1	136	103	33
NOP56	133	105	28
SEC31A	187	139	48
CCAR2	123	91	32
DDX39A	105	86	19
UBA2	140	94	46
ACOT7	189	141	48
PSMD11	259	204	55
EIF3F	239	187	52
EIF3D	185	139	46
DHX15	197	157	40
PSMD3	244	192	52
HNRNPR	187	142	45
NUDT21	122	93	29
SYNCRIP	194	152	42
SNRNP200	148	119	29
RSL1D1	104	100	4
LYPLA2	191	141	50
AHSA1	143	119	24
HSPA4L	167	125	42
BPNT1	147	100	47
HEXB	182	153	29
PARP1	176	149	27
PCNA	173	139	34
PRKAR2A	211	162	49
GSPT1	206	163	43
RPA2	123	92	31
PTPN1	130	104	26
COMT	208	170	38
HNRNPA2B1	232	181	51
RRM1	229	187	42
RPS12	202	157	45
DDX6	184	134	50
U2AF2	162	136	26
RPA1	129	95	34
PML	101	79	22
RPL9	187	165	22
HSPA4	245	192	53
SPR	113	91	22
RPL4	227	199	28
SRP14	150	126	24
FEN1	130	102	28
STAT1	203	155	48
MSH2	114	91	23
CBX5	114	92	22
RECQL	124	97	27
NSF	254	200	54
RPL28	196	145	51
MAP1B	116	75	41
ALDH7A1	214	164	50
HINT1	191	151	40
GMPS	202	153	49
RPL14	253	202	51
KPNA2	187	163	24
HNRNPF	191	157	34
SMS	187	146	41
BLVRA	141	126	15
USP14	228	177	51
EIF5	171	134	37
EIF3B	207	158	49
EIF3E	197	151	46
COPS2	201	151	50
RPS7	214	170	44
RPS16	247	193	54
RPS23	218	172	46
RPS18	243	192	51
SNRPD1	169	132	37
ETF1	194	159	35
RPS15	163	134	29
RPL10A	225	174	51
TRA2B	144	116	28
AP2B1	256	201	55
RPL38	160	121	39
PAFAH1B2	214	169	45
PRKDC	194	164	30
FKBP4	195	165	30
RPL18	250	195	55
ARHGAP1	135	99	36
CRYZ	157	110	47
PPID	182	140	42
SSRP1	143	115	28
RBBP4	192	143	49
SF3A3	129	96	33
ILF2	133	105	28
ILF3	147	117	30
HNRNPA0	173	126	47
TRIM28	161	125	36
EIF3I	211	161	50
DYNC1I2	195	150	45
HDAC1	150	111	39
IDI1	129	102	27
CKAP5	127	103	24
EIF3A	202	152	50
MCM6	115	89	26
EFTUD2	191	149	42
EIF4H	135	106	29
PEA15	147	115	32
NONO	214	168	46
PPP1R7	184	140	44
PSMD5	217	167	50
DDB1	174	126	48
RBBP7	192	143	49
HNRNPUL2	155	113	42
PDCD4	111	75	36
HP1BP3	161	133	28
UBR4	210	173	37
HUWE1	193	145	48
CAND1	264	209	55
ABCF1	159	126	33
NPLOC4	170	127	43
IPO4	132	107	25
ANP32B	142	111	31
HDAC2	160	120	40
UPF1	186	147	39
TNPO1	214	171	43
IPO9	118	90	28
VPS35	264	209	55
MYBBP1A	103	81	22
ESYT1	149	123	26
COPS4	185	137	48
NAA15	177	133	44
XRN2	98	75	23
RNPEP	168	137	31
DCTPP1	120	98	22
MOB1A	198	157	41
XPNPEP1	218	166	52
DDX19A	151	123	28
RCC2	136	106	30
SAE1	125	85	40
PRPF19	182	134	48
SNX6	183	141	42
COPS3	191	140	51
EIF3L	204	155	49
NOP58	127	99	28
PPME1	141	97	44
SUPT16H	139	112	27
PSAT1	225	186	39
COPG1	230	177	53
FBL	136	109	27
RPS5	237	185	52
DAZAP1	124	99	25
ADSL	211	168	43
CHD4	131	106	25
PABPC4	235	193	42
BUB3	149	103	46
CSDE1	151	119	32
GLRX3	212	175	37
SRP72	161	125	36
GART	206	180	26
SFPQ	188	153	35
RPL10	201	171	30
NMT1	151	111	40
RPL27A	237	187	50
ARCN1	178	132	46
HNRNPA3	200	151	49
SEC13	164	123	41
COPZ1	136	103	33
RPL30	232	181	51
SKP1	178	134	44
CSNK2B	168	135	33
RAE1	118	95	23
TRIM25	150	120	30
IFI16	102	81	21
PRPF8	161	130	31
LRRC47	116	94	22
SCFD1	152	113	39
MAGOHB	124	88	36
UGGT1	172	132	40
SRP68	157	120	37
SBDS	147	107	40
AP2M1	199	151	48
PFN2	178	133	45
RPL32	219	178	41
PGM3	191	146	45
OXSR1	209	159	50
PSAP	185	150	35
RPL7	240	196	44
RCC1	119	95	24
SRM	168	125	43
MCM3	133	107	26
RPL12	217	167	50
MAP2K2	199	151	48
HCFC1	105	77	28
UBE2M	191	148	43
RPL18A	197	169	28
MAP2K1	219	169	50
RBM39	139	114	25
PAFAH1B3	212	165	47
BOLA2	138	112	26
EIF4G1	201	164	37
P4HA2	127	95	32
AP1G1	174	127	47
SGTA	162	126	36
ACSL4	211	174	37
VPS4B	231	179	52
PSMD10	178	137	41
PAPSS2	116	93	23
ACSL3	173	144	29
AK1	181	138	43
P4HA1	216	176	40
CTPS1	170	138	32
OSBP	118	93	25
ITGA3	230	179	51
EPHA2	231	184	47
SHMT2	197	148	49
ARL3	161	119	42
RANBP1	169	133	36
SERPINH1	256	203	53
RPL27	211	167	44
SORD	153	120	33
HMGCS1	208	174	34
TAGLN	162	114	48
PLOD1	191	142	49
GBE1	155	108	47
GALNT2	176	143	33
UBE2V1	172	141	31
SNX1	162	129	33
CUL4A	168	120	48
SEC23B	133	106	27
UAP1	189	148	41
CDC37	177	134	43
ACAT2	190	154	36
GLOD4	203	162	41
MAT2B	117	85	32
CHORDC1	151	116	35
CARHSP1	152	119	33
DYNC1LI1	201	163	38
AGRN	218	168	50
CAV1	143	106	37
ERLIN2	131	106	25
CYB5R3	200	158	42
COX4I1	116	92	24
PDIA4	163	135	28
PRKCSH	155	129	26
LMAN2	182	149	33
DDOST	148	121	27
HYOU1	180	148	32
SLC25A3	152	126	26
AK2	125	98	27
SDHA	161	121	40
KPNA4	191	149	42
SEC22B	127	92	35
CYC1	119	94	25
COX5B	118	93	25
COX6B1	114	89	25
SDHB	116	91	25
SCP2	143	117	26
ACAT1	138	104	34
PRDX3	152	126	26
UQCRC1	135	110	25
SERPINB6	127	99	28
HADHA	143	114	29
RPL29	162	134	28
PXN	152	116	36
LMAN1	161	129	32
ACADVL	145	101	44
BCAP31	141	114	27
RPS13	201	157	44
RPS25	201	164	37
SLC25A11	115	90	25
FLII	139	106	33
TMED2	124	98	26
HSD17B12	139	113	26
TXNDC5	165	133	32
NDRG1	138	121	17
TECR	130	105	25
DNAJB11	149	123	26
CNPY2	129	102	27
TOR1AIP1	98	77	21
RPL24	213	166	47
YKT6	139	101	38
ECHS1	145	119	26
STT3A	109	86	23
TUFM	159	131	28
SSR4	130	104	26
ASPH	121	95	26
PICALM	107	100	7
TSN	147	109	38
HADH	136	98	38
SLC25A24	107	82	25
LPP	141	106	35
SAR1A	204	157	47
MYOF	212	170	42
VAPA	132	101	31
NSFL1C	113	86	27
MTCH2	130	105	25
COX5A	122	96	26
GSTK1	115	90	25
FXR1	141	112	29
POLR2B	113	89	24
ZC3HAV1	150	122	28
PPA2	149	113	36
CAST	78	73	5
SMC4	142	115	27
RPL31	168	135	33
RPL19	194	158	36
LONP1	138	97	41
IGF2BP3	120	94	26
AP3D1	111	81	30
PDCD5	118	93	25
SCAMP3	169	138	31
U2SURP	104	81	23
DYNC1LI2	145	105	40
TPD52L2	147	119	28
PLOD3	140	107	33
EIF3G	132	105	27
PRPF6	109	86	23
GLS	90	74	16
SMC2	137	112	25
TXNDC12	112	87	25
EGFR	215	170	45
SNRNP70	147	119	28
PDHB	147	101	46
TOP2A	151	124	27
TPR	112	88	24
ETFA	168	122	46
ITGB4	176	130	46
STMN1	155	132	23
YBX3	110	89	21
HMGA1	145	122	23
EIF2S2	140	111	29
EIF4B	108	85	23
DNAJB1	159	124	35
MAP4	112	87	25
DNAJA1	237	190	47
HIBADH	125	88	37
MCM5	124	97	27
MCM7	138	112	26
FUS	110	85	25
ETFB	147	104	43
RBMX	130	105	25
RPS19	164	133	31
ECI1	123	98	25
RPS27	183	137	46
LRPPRC	153	121	32
MATR3	169	128	41
RANGAP1	155	123	32
RPL21	194	156	38
MSH6	115	91	24
SLC16A1	200	155	45
HADHB	137	106	31
ADAR	70	69	1
RPS20	217	169	48
PSME3	79	74	5
CNBP	124	95	29
RPS28	144	117	27
RPL8	190	154	36
YBX1	192	154	38
EIF4G2	152	122	30
GTF2I	110	85	25
FKBP3	116	91	25
PLCB3	145	114	31
OGDH	147	102	45
SRSF1	162	133	29
TWF1	168	130	38
AIMP1	165	127	38
ECH1	133	108	25
PRKAA1	112	90	22
G3BP1	137	103	34
SMC1A	127	101	26
NOLC1	104	81	23
RCN1	140	115	25
NSDHL	119	96	23
RALY	137	111	26
SRSF11	120	96	24
UBAP2L	66	65	1
LARP1	109	88	21
KTN1	135	98	37
SERBP1	110	87	23
HSPH1	206	161	45
RAD50	127	102	25
USP7	136	101	35
FKBP10	116	95	21
CCDC124	93	72	21
PFDN5	139	107	32
HSD17B10	131	106	25
ACO2	161	113	48
TXNDC17	181	145	36
CACYBP	173	138	35
DDX21	140	116	24
ATAD3A	115	90	25
TES	143	108	35
LIMA1	144	112	32
PFDN2	149	121	28
STOML2	133	107	26
STUB1	155	121	34
PLAA	118	88	30
NUDC	166	137	29
FARSA	137	102	35
LUC7L2	142	113	29
STRAP	198	150	48
RPL36	150	122	28
IGF2BP2	122	100	22
VBP1	128	97	31
HNRNPUL1	139	110	29
KHSRP	118	91	27
HGS	180	139	41
PPP1R12A	130	103	27
ACTL6A	128	95	33
IMPA1	104	82	22
GNPDA1	115	93	22
GMFB	130	104	26
SQSTM1	146	134	12
PITPNB	140	114	26
DLAT	161	113	48
ANP32A	130	101	29
PDHA1	131	88	43
SNRPA1	110	87	23
ACADM	130	93	37
IDH3A	134	89	45
OXCT1	121	75	46
KHDRBS1	136	100	36
PPP3CA	146	104	42
NSUN2	124	98	26
SCRN1	133	96	37
SART3	131	91	40
DECR1	133	100	33
NUP93	112	84	28
CPSF7	110	84	26
PSPC1	105	80	25
EIF2A	86	74	12
IARS2	127	98	29
MCTS1	156	123	33
SNX9	128	104	24
CPSF6	127	95	32
SUPT5H	101	78	23
PRPF4	106	80	26
PSIP1	94	72	22
NPM3	99	78	21
RPL35A	171	133	38
LMNB1	143	116	27
RPL34	159	121	38
MCM2	125	98	27
RBM25	101	78	23
RPL37A	115	101	14
SNRPD2	144	117	27
SF3B2	126	100	26
SF3A2	101	79	22
SF3A1	111	85	26
DBN1	149	120	29
ALYREF	104	82	22
CARM1	129	102	27
COLGALT1	147	111	36
SNRNP40	123	95	28
SF3B5	134	109	25
SRRT	128	92	36
DIABLO	93	72	21
SMC3	127	100	27
THRAP3	115	90	25
RBM8A	122	98	24
MCM4	126	102	24
PUF60	120	96	24
SRSF6	153	122	31
SMARCA5	121	97	24
VAPB	130	100	30
NUMA1	128	103	25
EDC4	114	91	23
FAM120A	128	102	26
EWSR1	100	79	21
PLOD2	137	97	40
AGR2	126	104	22
OAT	148	101	47
TACSTD2	172	126	46
HMOX2	105	81	24
HNRNPH3	117	91	26
PYCR1	125	102	23
TMPO	83	82	1
SUCLG1	132	91	41
ALDH18A1	137	97	40
GLG1	136	123	13
CCDC47	122	97	25
S100A16	193	147	46
FUBP3	109	86	23
RBM14	124	98	26
TBCB	131	104	27
POFUT1	106	80	26
SRRM2	110	85	25
PTMA	132	101	31
IMMT	128	103	25
PFDN1	109	86	23
HMGB3	95	74	21
LMNB2	111	85	26
BAG2	133	109	24
DTYMK	125	100	25
NDUFS1	109	84	25
GPD2	116	90	26
LSS	107	86	21
HDGF	112	85	27
PSMD4	139	102	37
MANF	122	97	25
PALLD	103	77	26
CELF1	130	102	28
CHMP5	172	140	32
RRBP1	134	106	28
DENR	108	87	21
AIP	132	103	29
TIPRL	132	103	29
RANBP2	123	98	25
PTPN11	189	150	39
FHL2	140	110	30
TOMM34	115	95	20
SUCLG2	128	89	39
CDC5L	96	75	21
G3BP2	128	97	31
USP10	98	76	22
PPM1G	110	87	23
EIF3J	105	82	23
PDE12	101	78	23
FUBP1	109	84	25
FAF2	107	81	26
SPAG9	105	84	21
ZNF185	63	61	2
AHNAK2	95	74	21
LDLR	139	102	37
NNT	106	81	25
LAMC2	134	90	44
PSMD9	123	94	29
NDUFS3	95	74	21
ACAA2	127	87	40
NIPSNAP1	116	91	25
SFXN1	122	97	25
LETM1	122	98	24
DLD	151	108	43
DSG2	174	128	46
PGAM5	99	75	24
AIFM1	128	103	25
FDXR	100	75	25
GRPEL1	128	103	25
ACAD9	102	79	23
FDFT1	116	94	22
CAPRIN1	120	95	25
IDH3B	117	80	37
LAMB3	131	87	44
DNAJC7	138	115	23
SPATS2L	108	86	22
YTHDF2	101	79	22
TRIP10	113	88	25
EDF1	108	87	21
PLIN3	93	88	5
BAG3	89	84	5
PABPN1	99	77	22
SDF4	140	111	29
ATOX1	97	93	4
TBCA	142	115	27
DUT	80	73	7
NASP	120	94	26
SUMO1	96	73	23
PDAP1	102	80	22
BTF3	118	95	23
PPIL1	110	87	23
SRSF9	111	88	23
SF1	96	75	21
DHCR7	102	81	21
ATXN2L	66	66	0
CDV3	96	75	21
DARS2	102	81	21
DDX42	93	72	21
UQCRH	102	79	23
TFAM	118	93	25
TNKS1BP1	103	81	22
TTC1	93	72	21
RPRD1B	97	73	24
RBM3	112	91	21
DNAJC9	94	74	20
STAU1	103	82	21
DNAJC8	95	73	22
MRPS22	100	76	24
PNPT1	109	84	25
SLIRP	113	88	25
TIMM44	97	75	22
