# Supplementary material for: A novel machine learning algorithm selects proteome signature to specifically identify cancer exosomes
Source: eLife. 2024 Mar 26;12:RP90390. doi: 10.7554/eLife.90390 (PMC10965221; doi:10.7554/eLife.90390)
Supplement: Figure 2—source data 4. [file elife-90390-fig2-data4.csv]

Symbol	Location
RPS27A	Cytoplasm
PKM	Cytoplasm
HSP90AB1	Cytoplasm
CLTC	Plasma Membrane
YWHAZ	Cytoplasm
HSPA5	Cytoplasm
ENO1	Cytoplasm
PPIA	Cytoplasm
HSP90AA1	Cytoplasm
EEF2	Cytoplasm
YWHAE	Cytoplasm
LDHA	Cytoplasm
TUBA1C	Cytoplasm
YWHAQ	Cytoplasm
GAPDH	Cytoplasm
TUBB4B	Cytoplasm
TUBB	Cytoplasm
YWHAB	Cytoplasm
HSP90B1	Cytoplasm
TLN1	Plasma Membrane
GNB1	Plasma Membrane
EZR	Plasma Membrane
YWHAG	Cytoplasm
CFL1	Nucleus
MYH9	Cytoplasm
TPI1	Cytoplasm
AHCY	Cytoplasm
EIF4A1	Cytoplasm
GDI2	Cytoplasm
THBS1	Extracellular Space
PFN1	Cytoplasm
MSN	Plasma Membrane
FASN	Cytoplasm
RAP1B	Cytoplasm
RAB35	Cytoplasm
SDCBP	Plasma Membrane
PGK1	Cytoplasm
ALDOA	Cytoplasm
PDCD6IP	Cytoplasm
CLIC1	Nucleus
ACLY	Cytoplasm
PGD	Cytoplasm
FLNA	Cytoplasm
RHOA	Cytoplasm
TUBA4A	Cytoplasm
LDHB	Cytoplasm
RAB10	Cytoplasm
RAB7A	Cytoplasm
WDR1	Extracellular Space
CCT3	Cytoplasm
EHD1	Cytoplasm
DYNC1H1	Cytoplasm
CCT4	Cytoplasm
KPNB1	Nucleus
RAB1B	Cytoplasm
CAP1	Plasma Membrane
ATIC	Cytoplasm
RDX	Cytoplasm
ACTN1	Cytoplasm
IQGAP1	Cytoplasm
ATP1A1	Plasma Membrane
GNAI2	Plasma Membrane
PRDX1	Cytoplasm
TAGLN2	Cytoplasm
UBA1	Cytoplasm
CDC42	Cytoplasm
EEF1G	Cytoplasm
RAB1A	Cytoplasm
CCT2	Cytoplasm
TCP1	Cytoplasm
ACTN4	Cytoplasm
ARF4	Cytoplasm
MYL6	Cytoplasm
RAB5C	Cytoplasm
PPP2R1A	Cytoplasm
CCT6A	Cytoplasm
PPP1CA	Cytoplasm
CCT5	Cytoplasm
GNAI3	Cytoplasm
PDIA3	Cytoplasm
CLIC4	Plasma Membrane
RPSA	Cytoplasm
RPS2	Cytoplasm
ANXA5	Plasma Membrane
RAB14	Cytoplasm
HNRNPK	Nucleus
DSTN	Cytoplasm
PSMD2	Cytoplasm
PTGES3	Cytoplasm
CCT7	Cytoplasm
MYH10	Cytoplasm
YWHAH	Cytoplasm
PYGB	Cytoplasm
EHD4	Plasma Membrane
ADK	Nucleus
ACTR3	Plasma Membrane
PYGL	Cytoplasm
TFRC	Plasma Membrane
NAP1L1	Nucleus
PPP1CB	Cytoplasm
LOC105378936	Other
COL6A1	Extracellular Space
PCBP1	Nucleus
TUBB3	Cytoplasm
MTHFD1	Cytoplasm
FLOT2	Plasma Membrane
PSMD13	Cytoplasm
EEF1A2	Cytoplasm
ILK	Plasma Membrane
RPS4X	Cytoplasm
VPS35	Cytoplasm
CAND1	Cytoplasm
PFKL	Cytoplasm
PDCD6	Cytoplasm
UGDH	Nucleus
CAPZA1	Cytoplasm
CBR1	Cytoplasm
FLOT1	Plasma Membrane
STOM	Plasma Membrane
VCP	Cytoplasm
SFN	Cytoplasm
IDH1	Cytoplasm
PABPC1	Cytoplasm
TSG101	Cytoplasm
CCT8	Cytoplasm
RAB2A	Cytoplasm
GSTP1	Cytoplasm
ADH5	Cytoplasm
CORO1C	Cytoplasm
VCL	Plasma Membrane
PSMD11	Cytoplasm
ALDH9A1	Cytoplasm
PSMD12	Cytoplasm
PGM1	Cytoplasm
PRDX6	Cytoplasm
CAPZB	Cytoplasm
PAICS	Cytoplasm
GFPT1	Cytoplasm
TKT	Cytoplasm
CYFIP1	Cytoplasm
PFKP	Cytoplasm
