# Supplementary material for: A novel machine learning algorithm selects proteome signature to specifically identify cancer exosomes
Source: eLife. 2024 Mar 26;12:RP90390. doi: 10.7554/eLife.90390 (PMC10965221; doi:10.7554/eLife.90390)
Supplement: Figure 2—source data 5. [file elife-90390-fig2-data5.csv]

geneSet	description	link	size	overlap	expect	enrichmentRatio	pValue	FDR	overlapId	database	userId
GO:0016192	vesicle-mediated transport	http://amigo.geneontology.org/amigo/term/GO:0016192	1942	77	14.76324935	5.215653965	0	0	47;81;87;226;308;378;387;829;832;998;1213;1778;1938;2040;2316;2665;2771;2773;2950;3190;3320;3326;3417;3837;4478;4627;4628;5211;5236;5315;5478;5708;5717;5718;5719;5834;5836;5861;5862;5878;5908;5962;6233;6386;7037;7057;7094;7184;7251;7277;7414;7415;7430;7879;8407;8826;9588;9948;10015;10016;10096;10211;10383;10487;10576;10694;10890;10938;11021;23191;23603;30844;51552;55737;55832;81876;203068	geneontology_Biological_Process	RPS27A;PKM;HSP90AB1;CLTC;PPIA;HSP90AA1;EEF2;TUBB4B;TUBB;HSP90B1;TLN1;EZR;MYH9;GDI2;THBS1;MSN;RAP1B;RAB35;SDCBP;ALDOA;PDCD6IP;ACLY;FLNA;RHOA;TUBA4A;RAB10;RAB7A;WDR1;EHD1;DYNC1H1;KPNB1;RAB1B;CAP1;RDX;ACTN1;IQGAP1;GNAI2;TAGLN2;CDC42;RAB1A;CCT2;ACTN4;ARF4;RAB5C;GNAI3;ANXA5;RAB14;HNRNPK;PSMD2;MYH10;PYGB;EHD4;ACTR3;PYGL;TFRC;PSMD13;VPS35;CAND1;PFKL;PDCD6;CAPZA1;FLOT1;STOM;VCP;IDH1;TSG101;CCT8;RAB2A;GST…
GO:0099503	secretory vesicle	http://amigo.geneontology.org/amigo/term/GO:0099503	976	47	7.4196351	6.334543326	0	0	47;81;87;226;387;998;1778;1938;2040;2319;2665;2773;2950;3320;3326;3417;3837;5211;5236;5315;5478;5708;5717;5718;5719;5834;5836;5878;5908;6386;6950;7057;7414;7415;7879;8826;9588;10383;10487;10576;10694;10890;11021;23191;51552;55832;203068	geneontology_Cellular_Component	PKM;HSP90AB1;PPIA;HSP90AA1;EEF2;TUBB4B;TUBB;GDI2;THBS1;RAP1B;RAB35;SDCBP;ALDOA;ACLY;RHOA;RAB10;RAB7A;DYNC1H1;KPNB1;CAP1;ACTN1;IQGAP1;CDC42;CCT2;TCP1;ACTN4;RAB5C;GNAI3;RAB14;PSMD2;PYGB;PYGL;FLOT2;PSMD13;CAND1;PFKL;STOM;VCP;IDH1;CCT8;GSTP1;VCL;PSMD11;PSMD12;PGM1;PRDX6;CYFIP1
GO:0006887	exocytosis	http://amigo.geneontology.org/amigo/term/GO:0006887	894	52	6.796264118	7.651262384	0	0	47;81;87;226;308;387;1778;1938;2040;2316;2665;2771;2950;3320;3326;3417;3837;4628;5211;5236;5315;5478;5708;5717;5718;5719;5834;5836;5878;5908;6386;7057;7094;7251;7277;7414;7415;7879;8407;8826;9588;9948;10015;10383;10487;10576;10694;10890;23191;51552;55832;203068	geneontology_Biological_Process	PKM;HSP90AB1;PPIA;HSP90AA1;EEF2;TUBB4B;TUBB;TLN1;GDI2;THBS1;RAP1B;SDCBP;ALDOA;PDCD6IP;ACLY;FLNA;RHOA;TUBA4A;RAB10;RAB7A;WDR1;DYNC1H1;KPNB1;CAP1;ACTN1;IQGAP1;GNAI2;TAGLN2;CCT2;ACTN4;RAB5C;ANXA5;RAB14;PSMD2;MYH10;PYGB;PYGL;PSMD13;CAND1;PFKL;STOM;VCP;IDH1;TSG101;CCT8;GSTP1;VCL;PSMD11;PSMD12;PGM1;PRDX6;CYFIP1
GO:0006897	endocytosis	http://amigo.geneontology.org/amigo/term/GO:0006897	675	24	5.131407472	4.677079365	2.70E-10	1.87E-08	81;998;1213;3190;3320;3326;4627;5861;5878;6386;7037;7057;7184;7251;7430;7879;10096;10211;10487;10938;23191;23603;30844;51552	geneontology_Biological_Process	HSP90AB1;CLTC;HSP90AA1;HSP90B1;EZR;MYH9;THBS1;SDCBP;RAB7A;EHD1;CAP1;CDC42;RAB1A;ACTN4;RAB5C;RAB14;HNRNPK;EHD4;ACTR3;TFRC;FLOT1;TSG101;CORO1C;CYFIP1
GO:1903543	positive regulation of exosomal secretion	http://amigo.geneontology.org/amigo/term/GO:1903543	15	4	0.114031277	35.07809524	4.09E-06	1.13E-04	6386;7251;7879;10015	geneontology_Biological_Process	SDCBP;PDCD6IP;RAB7A;TSG101
GO:0010008	endosome membrane	http://amigo.geneontology.org/amigo/term/GO:0010008	461	14	3.504561251	3.994793926	1.14E-05	2.94E-04	1213;2923;5878;6233;7037;7251;7317;7879;10890;10938;11021;30844;51552;55737	geneontology_Cellular_Component	RPS27A;CLTC;RAB35;RAB10;RAB7A;EHD1;UBA1;RAB5C;PDIA3;RAB14;EHD4;TFRC;VPS35;TSG101
GO:0030139	endocytic vesicle	http://amigo.geneontology.org/amigo/term/GO:0030139	289	11	2.197002606	5.006821552	1.33E-05	3.39E-04	1213;2319;2923;3320;5878;6233;7184;7879;10890;11021;51552	geneontology_Cellular_Component	RPS27A;CLTC;HSP90AA1;HSP90B1;RAB35;RAB10;RAB7A;RAB5C;PDIA3;RAB14;FLOT2
GO:0097734	extracellular exosome biogenesis	http://amigo.geneontology.org/amigo/term/GO:0097734	22	4	0.167245873	23.91688312	2.10E-05	5.06E-04	6386;7251;7879;10015	geneontology_Biological_Process	SDCBP;PDCD6IP;RAB7A;TSG101
