# Supplementary material for: A novel machine learning algorithm selects proteome signature to specifically identify cancer exosomes
Source: eLife. 2024 Mar 26;12:RP90390. doi: 10.7554/eLife.90390 (PMC10965221; doi:10.7554/eLife.90390)
Supplement: Figure 3—source data 1. [file elife-90390-fig3-data1.csv]

gene	pos_all	pos_t	pos_c	# all samples 158 /cancer 101/ control 57
POTEF	155	100	55
HSPA8	146	97	49
GNAT3	124	83	41
C4A	128	89	39
ATP1A2	121	76	45
ALB	156	100	56
ITIH4	85	60	25
IGLL5	133	91	42
KRT35	53	30	23
GNB2	139	90	49
KRT19	110	69	41
FGG	136	92	44
C1QB	100	69	31
FGB	141	97	44
SELENOP	40	24	16
CD36	67	33	34
HBD	151	98	53
C8B	81	55	26
SLC3A2	89	65	24
UBC	151	96	55
ABCB9	5	4	1
C4B_2	128	89	39
KRT8	129	86	43
MASP1	22	21	1
CFH	54	44	10
HBA2	155	100	55
SERPINA3	64	47	17
CFI	15	13	2
FN1	87	61	26
KLKB1	30	25	5
CLU	123	90	33
HYI	8	6	2
CFB	58	47	11
ACTG1	155	100	55
TNC	59	53	6
KRT13	85	52	33
KRT9	86	46	40
APOC4-APOC2	34	24	10
APOC1	101	71	30
LGALS3BP	80	57	23
MASP2	16	14	2
APOL1	42	30	12
CEP290	8	6	2
STX7	84	57	27
CD5L	94	66	28
FCN3	44	30	14
KRT36	51	27	24
F13A1	115	83	32
HPR	134	87	47
PLG	132	93	39
CA1	47	38	9
CA2	48	28	20
SERPINC1	92	63	29
SERPINA1	132	91	41
A2M	155	100	55
KNG1	85	65	20
JCHAIN	118	80	38
PIGR	80	44	36
IGHG1	142	95	47
IGHG2	123	82	41
IGHG4	121	84	37
IGHA1	130	87	43
HBZ	77	51	26
HBE1	136	92	44
KRT14	114	69	45
KRT6A	138	88	50
APOA1	134	95	39
APOE	130	93	37
APOC3	64	47	17
FGA	138	95	43
SLC4A1	80	54	26
CRP	15	14	1
APCS	95	55	40
C1QA	57	43	14
C1QC	96	67	29
APOH	121	77	44
AMBP	64	51	13
ORM1	83	56	27
TTR	48	39	9
PF4	25	17	8
TFRC	103	76	27
LTF	116	71	45
HPX	94	63	31
FTL	136	86	50
FTH1	146	91	55
C4BPA	111	77	34
VTN	148	98	50
APOB	127	89	38
HRG	94	67	27
KRT6B	139	89	50
KRT1	140	88	52
VWF	108	76	32
GNAI2	140	93	47
ATP1A1	129	84	45
APOD	94	56	38
S100A8	71	47	24
SERPING1	94	61	33
F13B	16	15	1
KRT18	95	55	40
IGKV4-1	72	54	18
S100A9	63	44	19
S100A6	133	86	47
APOA4	87	70	17
C8A	75	53	22
C8G	64	46	18
PFN1	149	99	50
HSPA1A	144	93	51
LPA	43	32	11
SERPINF2	64	46	18
KRT7	132	87	45
GNAI3	136	89	47
KRT16	112	67	45
GNAO1	127	86	41
C1S	74	59	15
POTEI	155	100	55
POTEJ	152	100	52
SAA1	14	13	1
SAA2	12	11	1
PF4V1	21	17	4
HSPA5	140	91	49
SLC2A1	38	34	4
KRT3	120	79	41
KRT10	124	74	50
KRT5	139	89	50
GFAP	111	73	38
HSP90B1	144	93	51
ANPEP	97	59	38
EZR	144	94	50
CD44	110	79	31
GNB3	115	71	44
HSPA6	137	91	46
LBP	44	33	11
KRT15	106	66	40
KRT4	116	73	43
ORM2	44	36	8
ITIH2	118	86	32
ITIH1	108	85	23
PZP	153	99	54
C4BPB	34	28	6
MSN	145	95	50
STOM	136	89	47
PON1	106	73	33
YWHAQ	140	93	47
CFP	14	12	2
YWHAB	143	94	49
SFN	134	90	44
S100A11	122	85	37
PRDX2	137	91	46
HSPA1L	139	91	48
RDX	141	93	48
KRT20	26	21	5
KRT2	127	79	48
KRT6C	138	88	50
HSPA2	144	95	49
ATP12A	111	70	41
DEFA1	128	83	45
DEFA3	128	83	45
YWHAG	139	92	47
YWHAE	140	92	48
GNB1	141	90	51
RPS27A	151	96	55
UBA52	151	96	55
GNAS	134	90	44
GNAI1	136	89	47
YWHAZ	149	99	50
ACTG2	155	100	55
ACTA1	155	100	55
HBB	156	100	56
HBG1	140	93	47
HBG2	140	93	47
HBA1	156	100	56
HSPG2	108	74	34
CLTC	143	92	51
KRT76	122	79	43
RHAG	5	5	0
CFHR3	17	14	3
GNA12	120	82	38
CFHR1	55	47	8
KRT17	108	65	43
YWHAH	143	96	47
CD47	92	60	32
CTTN	17	16	1
GNA13	125	84	41
KRT33B	52	28	24
KRT72	90	59	31
PON3	68	49	19
KRT31	52	28	24
FCN2	19	17	2
ECM1	42	37	5
UGT8	63	46	17
KRT24	65	38	27
ACTBL2	152	100	52
STEAP3	9	8	1
KRT80	70	41	29
KRT74	84	58	26
KRT25	52	36	16
KRT77	114	74	40
KRT73	85	58	27
ALDH16A1	117	77	40
OIT3	11	10	1
CFHR5	25	23	2
POTEKP	152	100	52
GNB4	138	89	49
KRT84	119	81	38
C1RL	22	19	3
DAAM1	17	9	8
IGLC3	133	90	43
IGHA2	119	80	39
IGKV1-8	15	11	4
IGKV2-24	22	16	6
IGKV2D-24	19	14	5
IGKC	143	95	48
IGHV3-7	91	62	29
IGHV3-21	71	47	24
IGHV3-48	71	47	24
IGHV3-11	71	47	24
AHSG	96	67	29
IGHV4-59	56	41	15
IGHV3-33	73	47	26
IGHV3-74	75	50	25
IGHV5-51	26	19	7
IGKV3-20	71	50	21
IGKV1-12	16	12	4
IGKV1-6	18	14	4
IGKV1-39	16	12	4
IGHV3OR16-9	100	71	29
IGHV1-18	18	13	5
IGHV3-15	73	53	20
IGHV3-9	56	39	17
IGLV3-9	36	22	14
IGHV3--5	68	46	22
IGHV3OR16-10	52	36	16
IGHV3-43	51	34	17
IGHV3-20	52	36	16
IGHV3-73	71	52	19
IGHV3-38	42	30	12
ACTB	155	100	55
ATP1A3	122	79	43
IGHV3-23	67	45	22
IGHV3-53	70	45	25
IGHV3-13	45	30	15
IGHV3-64D	41	30	11
IGHV3-72	107	78	29
IGHV3-64	41	30	11
IGHV3-49	51	38	13
TTN	18	10	8
IGKV1-5	36	26	10
IGKV2-40	44	30	14
IGKV2D-28	53	38	15
COL6A1	132	81	51
GPX3	43	29	14
IGHM	143	95	48
IGHG3	137	90	47
IGLC7	107	73	34
IGHV1-69D	22	13	9
IGHV7-4-1	47	29	18
IGHV1-69	23	14	9
IGHV1-2	13	9	4
IGHV1-46	22	13	9
IGHV3OR16-13	38	25	13
IGHV4-28	22	16	6
IGHV4--2	29	22	7
IGHV4-39	56	41	15
IGHV4-4	32	23	9
IGHV4-34	56	41	15
IGHV4OR15-8	10	7	3
APOA2	116	81	35
IGHV2-5	11	10	1
IGKV1D-13	2	2	0
IGHV6-1	35	25	10
IGLV3-25	29	21	8
IGHV1OR15-1	12	8	4
IGHV3OR16-12	37	20	17
SAA2-SAA4	36	30	6
IGKV1-27	16	12	4
IGLV1-44	9	8	1
IGLV2-11	31	21	10
IGLV1-47	17	11	6
IGLV3-21	35	22	13
IGKV3-7	42	28	14
IGHV2-70D	17	12	5
IGLV3-1	15	12	3
IGHV2-26	11	9	2
IGHV5--1	27	20	7
IGHV1-3	21	12	9
IGLV4-69	8	6	2
IGLV2-14	10	7	3
IGLV4-60	3	3	0
PROS1	41	32	9
C1R	57	46	11
C4B	61	46	15
IGLV1-51	34	23	11
IGKV3OR2-268	42	28	14
IGLV3-10	28	23	5
IGHV1-8	23	14	9
IGLV2-8	31	22	9
IGLV1-40	4	4	0
ZNF621	3	3	0
RELN	7	7	0
SPTLC2	3	3	0
F11	18	17	1
IGKV3-11	53	32	21
GSN	145	100	45
CTSG	99	64	35
CPN1	30	25	5
CFL1	144	97	47
ST13	113	73	40
S100A10	116	77	39
B2M	126	86	40
PPIA	146	94	52
SIRPA	12	11	1
BASP1	117	78	39
SLC1A5	33	29	4
SVEP1	3	1	2
SHROOM3	8	8	0
EHD1	123	85	38
SPTLC3	1	1	0
EHD3	117	82	35
IGKV2D-29	36	26	10
IGKV2-30	36	27	9
IGKV2D-30	30	21	9
IGHV3-35	13	8	5
IGLV3-27	20	15	5
IGLV3-19	22	18	4
IGKV1D-33	28	19	9
IGKV2-29	36	26	10
IGLV3-16	16	13	3
RAB37	107	69	38
RAB30	107	69	38
RAB3D	120	78	42
F12	11	9	2
A1BG	71	54	17
RAB3A	119	78	41
RAB3B	118	77	41
RAB6A	129	82	47
CPN2	16	14	2
RAB8A	145	92	53
RAB4B	113	73	40
RAB10	146	93	53
RAB14	136	86	50
ATP6V0D1	89	66	23
RAB1A	147	94	53
RAB39A	108	70	38
RAB35	144	91	53
RAB12	108	67	41
ADAMTS13	6	6	0
RAB43	108	69	39
RAB8B	145	92	53
RAB39B	107	69	38
RAB3C	118	77	41
RAB33B	107	69	38
RAB1B	147	94	53
RAB6B	119	76	43
TLN1	143	97	46
RAB4A	115	75	40
IGKV1-16	17	13	4
CCDC30	0	0	0
FBLN1	125	86	39
POSTN	88	66	22
IBA57-DT	3	3	0
TUBA4A	136	89	47
CLEC3B	15	10	5
FLNA	143	94	49
COMP	40	32	8
SDCBP	124	82	42
BMP7	7	3	4
AHCYL2	116	73	43
SHBG	9	6	3
AFP	26	16	10
QSOX1	26	21	5
TECPR2	4	4	0
B4GALT5	33	28	5
AHCYL1	121	76	45
H2BC12	146	98	48
WDR1	135	90	45
XYLB	30	18	12
FLNB	138	93	45
MYCBP2	28	20	8
APOM	62	46	16
VNN1	10	7	3
PGK1	139	90	49
F10	38	29	9
ASS1	101	59	42
COL1A1	30	25	5
COL3A1	18	15	3
MT2A	77	41	36
ALDOA	136	93	43
TUBB4A	143	95	48
GAPDH	148	97	51
MT1E	77	41	36
AMY1A	46	24	22
AMY2A	46	24	22
SERPINA7	34	25	9
SERPIND1	84	49	35
ENO1	147	95	52
GPI	111	79	32
TUBB	150	98	52
HSP90AA1	145	92	53
THBS1	113	84	29
HSP90AB1	145	93	52
LTA4H	62	33	29
IGF2R	90	63	27
EEF2	133	88	45
MT1G	77	41	36
CD99	58	45	13
AKR1A1	123	79	44
PKM	145	94	51
CPA1	41	21	20
CPB1	38	19	19
AKR1B1	122	80	42
PGAM2	114	80	34
B4GALT1	36	30	6
H2AX	138	93	45
IGFBP2	2	1	1
VCL	109	73	36
PGAM1	124	82	42
AMY2B	46	24	22
H2AC7	142	95	47
OGN	77	51	26
ACO1	120	75	45
AHCY	135	85	50
PSMA4	135	83	52
MAPK3	113	79	34
ATP6V0C	8	7	1
MAPK1	120	82	38
BLVRB	115	76	39
GDI1	128	83	45
MAT2A	93	61	32
THBS2	92	75	17
THBS4	59	44	15
MYH9	140	99	41
SERPINF1	60	44	16
TAGLN2	127	87	40
THBS3	83	59	24
GDI2	133	85	48
RAB13	134	84	50
LUM	78	55	23
PGD	129	84	45
CTSC	76	57	19
ADK	111	71	40
H2BC5	146	98	48
TPI1	141	90	51
PSMA6	138	85	53
KRTDAP	1	1	0
ARF3	138	88	50
H2BC10	146	98	48
RAP1A	150	98	52
EIF5A	133	87	46
EEF1A1	148	94	54
TUBB4B	149	98	51
MT1X	77	41	36
ARF1	138	88	50
CAP1	145	94	51
SLC7A5	9	9	0
HGFAC	7	7	0
EEF1A2	148	94	54
ITIH3	63	52	11
FMOD	28	20	8
LRP1	118	79	39
EFEMP1	58	40	18
FSTL1	5	3	2
CNTN1	20	16	4
TRAP1	101	65	36
ILK	118	84	34
TUBB3	146	97	49
TUBA3C	149	95	54
TUBB2A	149	98	51
COTL1	74	46	28
FLNC	126	88	38
PCOLCE	30	27	3
PTGES3	117	76	41
RSU1	71	48	23
H2AC20	141	96	45
H2BC21	144	98	46
MEP1A	10	8	2
TUBB8	140	94	46
H2BC18	146	98	48
VASN	10	8	2
TUBA1A	150	95	55
FERMT3	114	85	29
H2AC21	129	88	41
PGAM4	101	66	35
H2BU1	144	98	46
PNLDC1	0	0	0
NEO1	5	5	0
H2AC6	142	95	47
BHMT	17	8	9
H2BC1	142	97	45
H2AC12	142	95	47
PGLYRP2	20	18	2
H2BC15	146	98	48
OMD	11	11	0
TUBA1C	149	95	54
TUBB6	139	93	46
TUBB2B	149	98	51
BHMT2	14	5	9
TUBB1	128	86	42
BRD9	19	13	6
IL1RAP	9	8	1
TUBA8	142	93	49
SERPINA10	23	19	4
PSMD13	121	81	40
PPIE	19	14	5
CLEC11A	24	21	3
TLN2	131	89	42
PPIAL4A	135	89	46
PCLO	10	9	1
RAP1B	137	91	46
ACE	52	30	22
CPB2	30	27	3
RBP4	17	15	2
COL1A2	16	16	0
H2BE1	129	87	42
PEPD	28	21	7
LDHB	132	85	47
DMBT1	59	35	24
FAM47E-STBD1	0	0	0
ZGRF1	0	0	0
MYL6	134	93	41
RHCE	17	12	5
TPM1	95	73	22
ANXA2	141	91	50
CFD	16	11	5
CLIC1	137	92	45
CLIC2	98	62	36
ACTN4	132	88	44
ATRN	7	7	0
NEBL	1	1	0
CAVIN2	32	10	22
LDHA	140	90	50
AGT	16	15	1
LRG1	16	14	2
PPBP	9	8	1
ITGB3	63	47	16
ITGB1	128	85	43
BCHE	12	12	0
GP1BA	0	0	0
SERPINA6	9	8	1
ITGA2B	35	28	7
ENO2	103	66	37
COL6A3	129	82	47
ACTN1	134	90	44
ENO3	125	81	44
MYL6B	121	85	36
UBA1	132	87	45
AZGP1	16	10	6
SERPINA4	13	8	5
MYH10	122	90	32
ACTN2	99	67	32
IGFALS	30	23	7
PGM1	114	74	40
CFHR2	12	11	1
GP5	0	0	0
AFM	16	14	2
LIMS1	94	65	29
ACLY	120	80	40
APOC4	4	4	0
VCP	136	92	44
CD81	121	83	38
EIF4A1	129	87	42
RHOA	144	92	52
LYZ	62	42	20
CALM1	142	92	50
TMSB4X	91	59	32
RAC1	140	91	49
TPM4	108	78	30
ACTN3	93	60	33
PLCXD2	0	0	0
PSMD2	123	85	38
APOF	54	40	14
CCIN	0	0	0
HABP2	61	48	13
ADIPOQ	8	5	3
TPM2	92	68	24
LIMS2	63	39	24
TSPAN14	65	46	19
ANGPTL6	3	3	0
PDCD6IP	141	93	48
CNDP1	2	2	0
CLIC6	83	49	34
COLEC11	7	7	0
C1QTNF3	19	15	4
PARVB	68	41	27
CTNNBIP1	0	0	0
PARVA	82	53	29
CLIC5	82	47	35
FETUB	12	9	3
PCYOX1	68	37	31
CFL2	134	90	44
DERA	112	74	38
CLIC4	121	79	42
FCGBP	64	47	17
COLEC10	10	9	1
IGKV3D-20	29	17	12
TPM3	98	72	26
LIMS4	91	63	28
CFHR4	3	3	0
IGHV3OR15-7	10	8	2
IGLV7-43	24	21	3
IGLV7-46	25	22	3
IGHV2-70	6	5	1
IGLV2-23	10	8	2
IGLV5-45	11	8	3
IGKV1-17	15	12	3
RHOC	142	91	51
CD9	123	88	35
PRG4	11	10	1
IGLV8-61	16	11	5
IGKV3D-15	22	17	5
MAN1C1	6	6	0
GGT3P	34	20	14
TUBAL3	122	82	40
MYO1G	43	28	15
CAPZB	126	82	44
PTPRC	88	56	32
GNAQ	80	53	27
ACTR3	128	88	40
ABCC3	1	1	0
SNCA	3	2	1
CYFIP2	118	82	36
HLA-B	83	53	30
HLA-C	83	55	28
ARHGDIB	85	52	33
HLA-A	109	76	33
BAIAP2	39	21	18
FABP5	55	28	27
ITGA6	68	52	16
RAB27B	52	33	19
PODXL	21	18	3
ADAM10	79	52	27
SLC9A3R1	49	29	20
ARPC1B	122	85	37
ARPC2	125	85	40
ARPC3	123	82	41
ARPC5	96	63	33
SERPINI2	72	39	33
TSPAN9	15	15	0
PNP	12	10	2
SPTA1	36	29	7
TNNC2	79	52	27
CAT	106	64	42
ANXA1	128	90	38
CAPNS1	109	77	32
ALDOB	90	57	33
YES1	119	81	38
LYN	119	81	38
MME	43	27	16
PLEK	58	47	11
GSTP1	133	89	44
CNP	115	81	34
ALDOC	106	72	34
TXN	116	80	36
PRKAR1A	107	77	30
MBL2	11	9	2
RALB	109	75	34
SPTB	77	53	24
SRC	114	78	36
GP1BB	5	5	0
LCP1	105	65	40
PLS3	111	71	40
GP9	4	4	0
FABP4	20	12	8
RAC2	137	91	46
IGLL1	3	3	0
SPN	19	12	7
ANK1	46	33	13
EPB42	42	32	10
RHOQ	78	53	25
GGT1	37	21	16
CD247	2	1	1
NT5E	79	44	35
S100A4	80	54	26
CALML3	128	81	47
DPP4	51	26	25
TKT	130	84	46
GNA11	102	69	33
PRDX5	128	84	44
PKLR	93	63	30
SERPINB1	90	51	39
CORO1A	122	87	35
BSG	61	51	10
MYH11	126	92	34
TM4SF4	1	0	1
SERPINB8	85	44	41
SERPINB9	84	45	39
VASP	105	80	25
RAB5C	125	89	36
ARHGDIA	88	61	27
CAPZA1	126	86	40
CLTCL1	129	87	42
ARPC4	116	79	37
RAC3	132	88	44
CDC42	144	92	52
DSTN	124	80	44
ACTR2	128	86	42
GNG5	71	51	20
GPLD1	19	11	8
RHOG	120	81	39
PSME1	113	74	39
EPS8	42	26	16
MMRN1	13	12	1
RASA3	13	12	1
LASP1	76	49	27
STXBP2	87	59	28
ZYX	68	44	24
TWF2	74	49	25
CYFIP1	122	84	38
MYH14	121	86	35
ARHGAP18	18	12	6
FAM151A	0	0	0
ST8SIA4	0	0	0
ARPC1A	101	65	36
CNN2	51	35	16
KRT12	70	43	27
PARK7	107	65	42
SH3BGRL3	51	33	18
RHOJ	78	53	25
GPRC5C	15	10	5
CLEC1B	2	2	0
ABRACL	20	16	4
CORO1C	100	65	35
TELO2	7	6	1
SHANK1	3	3	0
F11R	60	34	26
IGHD	14	12	2
PECAM1	45	27	18
IGHV1-24	2	2	0
IGHV1--2	0	0	0
CASK	50	40	10
IGLV1-36	1	1	0
FCGR3A	16	13	3
ITGB2	103	68	35
GTF2IRD2	4	4	0
BIN2	3	2	1
RNF39	0	0	0
A2ML1	0	0	0
FAM25C	0	0	0
MAPK12	81	52	29
SRI	126	88	38
SSR1	32	18	14
CYCS	17	13	4
AKR1B15	71	41	30
IL36RN	0	0	0
EIF4E	106	71	35
RACK1	116	76	40
HNRNPH1	103	70	33
MYO1B	91	65	26
CAP2	77	49	28
GANAB	111	77	34
CHIA	2	2	0
NPEPPS	105	67	38
IQGAP3	82	52	30
NAP1L1	103	73	30
HNRNPA1	115	75	40
NACA	41	33	8
RPLP0	122	81	41
PSMA3	111	68	43
CDSN	1	0	1
HDLBP	75	57	18
P4HB	137	87	50
SERPINB4	3	3	0
RPS3	123	76	47
MACF1	70	45	25
HAGH	30	17	13
DMKN	0	0	0
CCT8	115	77	38
DDX5	104	74	30
PSMB3	119	74	45
DCXR	74	41	33
PPL	39	17	22
PDLIM1	35	16	19
MYO1C	107	73	34
SULT2B1	24	10	14
PSMD12	118	79	39
GAPDHS	84	57	27
IMPA2	36	17	19
PSMA7	137	85	52
XPO1	119	78	41
SPTBN2	72	46	26
PFAS	76	52	24
MAPK13	88	56	32
EIF3H	94	59	35
DDX3Y	109	76	33
TXNL1	100	65	35
KRT86	83	55	28
AKR1B10	46	32	14
PRPSAP2	69	48	21
KIF5C	96	67	29
UGDH	119	77	42
HIP1R	26	15	11
GGCT	10	6	4
PDCD6	106	74	32
VPS26A	94	60	34
ERN1	0	0	0
LYPLA1	111	77	34
CREG1	4	3	1
SERPINB7	0	0	0
CBR3	113	75	38
IDH1	128	80	48
KRT33A	10	4	6
KRT34	9	3	6
ENDOD1	58	36	22
DUSP14	3	2	1
SCEL	20	3	17
PGLS	91	58	33
IPO7	102	68	34
PTBP3	63	46	17
AP2A1	122	81	41
CLIC3	41	20	21
DDAH2	90	57	33
LY6G6C	0	0	0
HPRT1	77	53	24
CST3	14	9	5
CSTA	6	3	3
CRYAB	83	52	31
LMNA	77	50	27
GBA	36	28	8
HSPB1	123	85	38
RPN1	91	59	32
RPN2	72	45	27
ARG1	10	1	9
ALDH2	104	60	44
SERPINB2	1	1	0
SLC25A5	50	28	22
EIF2S1	107	68	39
RPLP1	90	62	28
ATP5F1B	119	78	41
CKM	20	15	5
PYGL	122	82	40
NPM1	90	67	23
PGK2	128	81	47
CAPN1	99	64	35
IVL	0	0	0
EPRS1	124	81	43
VIM	130	91	39
ANXA5	139	92	47
QDPR	108	68	40
ANXA4	132	85	47
HMOX1	9	7	2
H2AZ1	127	87	40
PLA2G4B	0	0	0
RO60	76	52	24
CTSA	38	28	10
HSPD1	97	64	33
PYGB	123	82	41
PYGM	115	77	38
LAMP1	113	75	38
G6PD	112	77	35
MTHFD1	118	77	41
PABPC1	102	72	30
NEFH	31	27	4
HARS1	14	8	6
SLC25A4	45	25	20
SLC25A6	47	26	21
IMPDH2	91	71	20
CKB	83	49	34
CKMT1A	43	30	13
XRCC6	122	85	37
LAMP2	98	62	36
RNH1	107	73	34
TPT1	93	64	29
APEH	62	29	33
ANXA8	22	12	10
MIF	120	81	39
FDPS	88	54	34
IDE	43	27	16
DARS1	118	78	40
JUP	94	60	34
UCHL3	19	11	8
NME1	121	81	40
RPS2	131	86	45
DSP	35	23	12
NQO2	14	7	7
CBR1	127	84	43
GOT1	15	11	4
DES	88	66	22
GM2A	2	2	0
LGALS3	99	66	33
TCP1	128	87	41
ARF4	127	82	45
IL1RN	2	2	0
MYL12A	78	56	22
TYMP	112	76	36
ANXA7	123	80	43
RAB5A	120	85	35
PSMB1	127	79	48
FLG	6	3	3
GSTM3	122	78	44
ATP6V1B2	103	75	28
VDAC1	56	35	21
PCMT1	50	38	12
NME2	123	82	41
TGM1	6	0	6
PPIB	124	81	43
EEF1B2	86	63	23
MPST	84	55	29
ATP5F1A	88	52	36
PSMA1	131	80	51
PSMA2	128	80	48
PTBP1	98	69	29
EEF1G	129	86	43
CALR	117	81	36
CANX	111	77	34
PSMA5	140	88	52
PSMB4	122	73	49
PSMB6	100	62	38
PSMB5	110	69	41
S100A2	8	8	0
CRABP2	28	27	1
SERPINB3	4	4	0
PRDX6	131	83	48
CMPK1	108	68	40
PEBP1	113	67	46
PDIA3	132	89	43
PPP2R1A	128	86	42
PPP2R1B	96	61	35
S100A7	25	14	11
CASP14	3	2	1
STIP1	91	60	31
KIF5B	111	77	34
PHB	21	13	8
RPL22	108	75	33
GLRX	39	27	12
ATP6V1E1	106	74	32
SERPINB5	21	18	3
TALDO1	123	83	40
ATP6V1A	119	83	36
HSPA9	49	28	21
EIF4A3	115	75	40
RPL3	119	79	40
CAPG	90	61	29
CCT6A	132	91	41
MDH1	90	52	38
MDH2	101	68	33
PRPH	95	70	25
HAL	11	3	8
PRCP	53	36	17
PAFAH1B1	118	78	40
USP5	113	73	40
MAPK8	82	54	28
MAPK9	85	56	29
IQGAP1	130	87	43
CAPZA2	118	79	39
QARS1	103	68	35
LGALS7	6	5	1
PREP	103	66	37
ME1	10	9	1
CCT5	124	84	40
CSNK1A1	54	35	19
IDH2	111	70	41
ALDH9A1	124	82	42
FASN	122	80	42
CCT3	122	83	39
SRP9	54	48	6
PSMB2	104	59	45
TMED10	106	70	36
KLK7	0	0	0
DNM2	107	77	30
CCT4	124	84	40
RAB7A	137	91	46
PLCD1	32	13	19
ALDH3A2	76	44	32
HSD17B4	78	44	34
HNRNPM	97	72	25
MVD	33	26	7
COPB1	126	82	44
SEC24C	87	54	33
NAPA	110	77	33
HNRNPH2	101	69	32
EIF6	90	59	31
RAB25	63	40	23
RAB2A	131	84	47
RAB5B	124	87	37
UBE2D3	45	30	15
NUTF2	96	65	31
HNRNPK	129	88	41
RPS8	117	78	39
RPS15A	116	71	45
RPS11	118	76	42
SNRPD3	74	61	13
ARF6	96	61	35
RAB11A	133	90	43
RPS4X	128	84	44
H4-16	141	94	47
RAN	132	90	42
RPL23	117	74	43
RPL11	119	78	41
PPP2R2A	98	64	34
DYNLL1	114	74	40
KRT83	83	55	28
KRT85	95	61	34
GSTO1	127	85	42
DCD	54	31	23
ARF5	118	78	40
ERH	89	60	29
SRSF3	82	57	25
PFKP	106	76	30
DSG1	6	3	3
DSC2	20	11	9
NUCB1	59	36	23
RPL6	119	80	39
GLO1	92	61	31
PRDX1	142	92	50
C1QBP	22	19	3
CKAP4	59	40	19
TGM3	1	0	1
DHX9	114	80	34
GOLGA3	4	4	0
DSC1	2	0	2
AHNAK	117	77	40
AP1B1	117	77	40
KIF5A	98	67	31
MTAP	33	18	15
PRDX4	124	76	48
CAMK2D	99	67	32
SPTAN1	106	69	37
PKP1	1	1	0
BLMH	22	12	10
PTK6	4	3	1
TRIM29	1	1	0
TTLL12	88	61	27
DYNC1H1	121	85	36
EIF4A2	130	87	43
DSC3	1	1	0
PLS1	95	55	40
KPNB1	124	84	40
PLEC	111	77	34
PPA1	119	78	41
PCBP1	124	83	41
MAPRE2	66	50	16
MAPRE1	63	49	14
MYLK	96	62	34
MLF2	5	5	0
CST6	0	0	0
RAB11B	134	90	44
CSRP2	60	41	19
MAPK14	93	61	32
FSCN1	110	78	32
LGALSL	22	13	9
ASPRV1	1	0	1
HSP90AB4P	134	86	48
HSP90AA4P	120	79	41
FLG2	8	4	4
SARS1	119	78	41
KPRP	3	1	2
SURF4	37	23	14
YOD1	1	1	0
PPP2R2D	94	61	33
PLBD1	14	13	1
MOXD1	16	10	6
SBSN	5	4	1
RPTN	0	0	0
NAPRT	75	43	32
CD109	15	10	5
LDHAL6A	98	68	30
ACP7	1	1	0
NCCRP1	2	1	1
H3C13	138	95	43
H2AZ2	127	87	40
EIF3M	108	73	35
GDPD3	0	0	0
TFAP2D	4	4	0
S100A7A	9	5	4
NLRP10	0	0	0
PLA2G4D	0	0	0
HRNR	42	23	19
SERPINA12	1	0	1
KRT78	85	55	30
SDR16C5	3	1	2
SDR9C7	0	0	0
HM13	3	3	0
EPS8L1	19	16	3
RPS21	28	17	11
STAG1	22	17	5
POF1B	1	1	0
DDX1	103	70	33
GCN1	93	65	28
EVPL	29	10	19
GGH	33	30	3
MYDGF	27	19	8
LRRC59	60	49	11
ARL8A	91	60	31
DYNLL2	113	74	39
OTUB1	115	76	39
PGM2	12	8	4
PDLIM5	88	59	29
CNDP2	112	68	44
SERPINB12	1	0	1
GSDMA	2	1	1
PSMB7	96	59	37
S100A13	71	50	21
PHB2	26	16	10
CCT7	127	83	44
TREX2	0	0	0
PRXL2A	33	25	8
ERP44	101	71	30
TMEM43	34	16	18
BDH2	104	69	35
TMED9	66	42	24
ELOVL1	4	3	1
KRT23	11	9	2
PITHD1	2	1	1
SDCBP2	31	25	6
RNASE7	1	0	1
MYLK2	74	48	26
TAOK3	38	26	12
UNC45A	73	48	25
NIT2	92	60	32
PHPT1	106	66	40
OLA1	110	72	38
ARL8B	95	62	33
DPP3	20	10	10
IL36G	0	0	0
CALML5	13	10	3
LARS1	101	69	32
TJP2	24	15	9
SWAP70	47	33	14
CPA4	0	0	0
SERPINB13	0	0	0
NAGK	108	74	34
NUDT5	15	9	6
RAB21	112	74	38
PYCARD	7	6	1
PA2G4	120	77	43
VDAC3	36	22	14
RTCB	115	75	40
NEU2	0	0	0
PKP3	19	11	8
CRYBG1	17	14	3
HEBP2	13	8	5
RPS24	102	65	37
RPL13A	112	74	38
RPSA	129	85	44
NT5C3A	36	28	8
VDAC2	49	28	21
KRT81	83	55	28
TGM5	25	10	15
ABI1	59	47	12
MYO6	61	40	21
DDX3X	113	77	36
ANXA8L1	22	12	10
EPPK1	80	53	27
REXO2	2	2	0
IGKV6D-21	12	10	2
DDX17	105	74	31
PHGDH	113	74	39
RPS14	115	74	41
CTSD	129	83	46
HARS2	10	5	5
CTNNB1	95	62	33
ASAH1	70	39	31
MAPK10	80	52	28
IGLV6-57	1	1	0
EPN2	1	1	0
KLK5	0	0	0
KRT87P	8	3	5
LTBP1	24	21	3
SMIM1	4	3	1
FCN1	8	6	2
HLA-H	102	70	32
BTD	1	1	0
PLTP	20	13	7
HLA-E	91	63	28
PASD1	0	0	0
PNPLA8	0	0	0
EMILIN1	61	47	14
GATD3B	16	4	12
IGKJ3	0	0	0
IGKV1D-16	9	8	1
IGLV9-49	4	4	0
IGLV2-18	10	10	0
MVK	2	1	1
HLA-DRB1	72	39	33
CCS	5	4	1
TGFB1I1	72	46	26
NCAM1	24	22	2
C5AR1	8	7	1
CALD1	24	21	3
C18orf63	6	6	0
TAGLN3	23	19	4
IGFBP3	1	1	0
FCGR3B	14	10	4
IGKV1-37	1	1	0
IGKJ1	2	2	0
ANO7	0	0	0
TBC1D30	3	3	0
DXO	4	3	1
AP2A2	123	82	41
SERPINA5	9	2	7
MST1	11	11	0
TGM4	1	1	0
CAMP	50	35	15
FGL1	9	8	1
IGKJ5	0	0	0
IGHJ2	0	0	0
SPP2	10	8	2
VPS13D	2	2	0
H3-3B	139	95	44
ABCB11	5	3	2
ADH1B	114	64	50
ALDH1A1	132	80	52
GLUD1	65	31	34
GSR	30	21	9
ASL	16	7	9
SERPINE1	35	24	11
ALPL	50	31	19
CEACAM1	19	14	5
PROZ	9	9	0
CES1	43	19	24
GLUD2	58	27	31
MARS1	95	66	29
INHBE	0	0	0
HSPE1	34	14	20
H3C1	140	95	45
ENPEP	31	17	14
AKAP6	0	0	0
TGFBI	113	83	30
H3-4	137	95	42
UGP2	94	59	35
ADGRG6	2	2	0
BPIFB1	24	16	8
BAIAP2L1	15	11	4
HSPE1-MOB4	55	28	27
IGKV6-21	9	7	2
PCK2	39	19	20
ESPN	0	0	0
CD55	64	37	27
TMEM201	1	1	0
SNAP23	50	30	20
CAPN5	42	28	14
PROM1	27	23	4
EPB41L2	115	82	33
XPNPEP2	6	1	5
ADH1C	109	60	49
ADA	15	12	3
NRAS	89	61	28
HRAS	90	61	29
KRAS	91	61	30
PCCA	12	2	10
PCCB	15	6	9
FABP1	15	8	7
ADH1A	110	61	49
ABCB1	9	5	4
ADH4	72	37	35
RAP2A	82	52	30
H1-4	84	66	18
EPB41	75	49	26
CPM	32	14	18
H1-3	83	66	17
H1-2	84	67	17
TSPAN8	66	40	26
CD58	14	12	2
ATP4A	99	60	39
ABCB4	8	4	4
TPP2	114	75	39
ACSL1	75	49	26
CTNNA1	104	66	38
PSMB10	59	39	20
ITGA1	63	35	28
RAP2B	91	59	32
RHOB	114	77	37
H1-1	74	60	14
PTPRJ	23	23	0
PRSS8	10	9	1
CYBRD1	56	32	24
PDZK1	9	3	6
SNX32	14	11	3
SLC22A9	0	0	0
GPT2	7	1	6
SNX18	33	28	5
ZBTB18	1	1	0
NSD3	0	0	0
ABCG8	0	0	0
EHD4	116	81	35
AHSP	2	1	1
CEMIP2	18	13	5
PACSIN2	64	33	31
TFR2	4	4	0
EPB41L3	97	65	32
RAP2C	83	53	30
NPC1L1	2	2	0
CAD	103	68	35
GCA	96	63	33
PSMC5	109	72	37
WBP2	3	3	0
CPNE3	119	78	41
SEMA7A	3	3	0
RP2	67	41	26
FLOT1	87	57	30
GYPC	10	8	2
TGM2	102	69	33
DDT	37	22	15
PSMC2	120	80	40
ANXA11	132	88	44
PSMD7	113	75	38
RAD23A	8	5	3
RAD23B	26	17	9
GP2	36	18	18
GNG2	53	42	11
PRPS1	108	73	35
PSMC1	115	79	36
PSMC6	118	79	39
CCT2	127	85	42
MPP1	37	25	12
ANK3	48	34	14
SELENBP1	85	48	37
DCTN2	37	29	8
FLOT2	87	57	30
PSMD6	115	75	40
TET1	0	0	0
CCT6B	105	71	34
PSMD1	114	77	37
CPNE1	109	79	30
GLIPR2	84	53	31
MSL2	0	0	0
RUVBL2	101	71	30
PSMC3	120	82	38
EPB41L1	80	52	28
FAP	35	31	4
GYPA	8	7	1
ANK2	34	27	7
SHPRH	0	0	0
ENPP3	2	1	1
SOD1	52	33	19
DBI	35	21	14
RPS17	74	57	17
RALA	107	71	36
GRB2	36	23	13
BST2	44	33	11
SLC9A3R2	31	12	19
ELAVL1	53	46	7
TGIF2LX	0	0	0
ULK2	0	0	0
ABCC2	2	2	0
PACSIN3	11	5	6
SARDH	16	3	13
SHANK2	0	0	0
WASF2	71	49	22
HLA-DRA	101	60	41
C2CD2L	0	0	0
ENDOV	0	0	0
LTN1	25	17	8
LCA5L	0	0	0
IGLV5-37	0	0	0
ARFGAP2	19	13	6
SNRPB2	33	30	3
IGLV4-3	0	0	0
ITLN1	9	5	4
ITLN2	7	4	3
PSMB9	79	42	37
STK24	95	69	26
ATP6V1B1	72	53	19
HNRNPAB	99	69	30
HNRNPD	120	80	40
ANXA3	55	34	21
ANXA6	135	89	46
FGFR1	74	52	22
SH3TC2	0	0	0
CDK17	76	54	22
FGFR3	74	52	22
HCK	116	78	38
APMAP	67	41	26
PLCL1	5	4	1
ESD	121	80	41
SMG1	27	22	5
CDK12	75	53	22
MYO1F	81	55	26
STK25	93	69	24
PPP6C	83	56	27
PDXK	107	71	36
TPP1	85	55	30
MYL12B	78	56	22
GMFG	82	53	29
MACROH2A1	115	78	37
PGLYRP1	8	8	0
CDK14	76	52	24
ANG	3	3	0
MPO	120	77	43
RPLP2	122	81	41
MYL1	58	40	18
LCK	87	62	25
FYN	113	75	38
CDK1	80	58	22
DCN	76	54	22
CTSL	16	12	4
APRT	116	80	36
ELANE	51	34	17
MYL3	55	37	18
LGALS1	132	89	43
FGR	77	55	22
SPP1	3	3	0
MYH3	43	30	13
ITGAM	64	40	24
TOP1	100	69	31
EPX	84	51	33
CDK4	78	55	23
COL6A2	109	65	44
RNASE3	11	5	6
MYH1	42	29	13
MYH7	44	31	13
XRCC5	121	84	37
MYH6	44	31	13
ALAD	19	11	8
GYS1	67	49	18
MMP9	14	13	1
H1-5	59	49	10
BPI	23	18	5
PFKL	117	82	35
NCL	81	67	14
HK1	64	39	25
NCF2	57	36	21
AZU1	69	40	29
BGN	66	51	15
FGFR4	74	52	22
AMPD1	3	2	1
WARS1	90	59	31
ACP1	99	66	33
MYL9	63	48	15
CDK2	80	56	24
S100P	55	46	9
HMGB2	24	22	2
PSMB8	101	60	41
LAP3	124	79	45
PTPN6	86	56	30
ERP29	59	35	24
ADSS2	80	51	29
CASQ1	7	6	1
ATIC	124	83	41
CDA	11	8	3
RNASE4	4	3	1
PPP1CC	122	83	39
MNDA	90	63	27
ACTR1B	117	80	37
NAMPT	107	70	37
PSMC4	109	73	36
GYG1	66	37	29
CDK9	75	53	22
HK2	61	36	25
HK3	49	29	20
COPA	121	80	41
SUB1	88	66	22
GYS2	21	14	7
CSE1L	117	80	37
MTPN	107	75	32
ACTR1A	121	82	39
RPL15	124	80	44
PPP1CA	123	83	40
PPP1CB	123	84	39
RPL7A	111	74	37
LCN2	26	21	5
S100A12	41	32	9
CDK6	75	53	22
CDK5	98	70	28
HNRNPU	119	80	39
AMPD3	28	19	9
CLC	46	27	19
CDK18	75	53	22
MYO1E	77	53	24
RAB31	73	48	25
MVP	138	88	50
IGFBP7	7	5	2
HKDC1	30	21	9
TIMP1	26	22	4
HMGB1	91	65	26
OLFML2B	14	14	0
H2BC19P	105	71	34
OLFM4	68	41	27
STK26	94	69	25
OSTF1	84	60	24
DOCK10	23	17	6
VAT1	124	88	36
ANP32E	39	34	5
MACROH2A2	113	77	36
VPS29	111	72	39
DBNL	67	49	18
MYH2	42	29	13
MYH13	41	29	12
PADI3	3	3	0
PADI4	23	13	10
CILK1	74	52	22
MYH15	4	3	1
SAMHD1	109	73	36
MYH4	42	29	13
HNRNPC	108	78	30
HNRNPDL	116	78	38
FGFR2	74	52	22
PRTN3	39	22	17
CDK13	75	53	22
NCF1	37	23	14
H3-2	136	94	42
MYL2	4	3	1
RPS3A	120	76	44
CSRP1	82	50	32
MYBPC1	7	6	1
ANAPC5	3	3	0
MYL4	5	4	1
SRSF2	19	18	1
PSMD14	102	67	35
BANF1	128	86	42
SKAP2	5	5	0
STK10	35	26	9
CYBB	77	53	24
HMGN2	21	18	3
SSB	92	65	27
H1-0	63	49	14
CTSB	112	80	32
RNASE1	5	3	2
ALOX5	40	30	10
UQCRC2	18	10	8
CTSS	29	19	10
RPL13	82	64	18
ICAM3	20	19	1
ADD1	74	52	22
DEK	25	23	2
RPL5	117	75	42
CRIP1	27	12	15
CSRP3	6	2	4
MFAP4	64	38	26
CCL18	2	1	1
RPL23A	49	35	14
RPS6	109	78	31
ACACA	58	37	21
PAK2	52	40	12
CBX3	58	43	15
SRSF7	29	24	5
LRRFIP1	25	15	10
FHL1	109	72	37
UNC13D	38	20	18
SRRM1	11	10	1
H1-10	36	30	6
ARHGEF2	55	34	21
MYLPF	5	4	1
MYCBP	15	13	2
NUCKS1	23	22	1
LRRFIP2	12	8	4
SOD2	25	12	13
TNNI2	3	2	1
TNNI1	5	4	1
CRTAC1	2	2	0
TNNT3	2	1	1
MPIG6B	1	1	0
PLXND1	27	20	7
DGLUCY	10	4	6
LTBP3	5	5	0
TBC1D8B	53	45	8
PRMT5	82	57	25
FYB1	1	1	0
STX11	20	3	17
PDE5A	18	6	12
PROC	1	1	0
MGP	6	6	0
CD14	31	20	11
DBH	10	10	0
CLTA	73	57	16
CLTB	51	39	12
THEGL	2	0	2
SLC2A3	14	12	2
CETP	4	4	0
FCER1G	56	37	19
SFTPD	18	4	14
TGFB2	0	0	0
GNG11	2	1	1
SPTBN1	105	74	31
DMTN	4	1	3
INF2	74	51	23
TRIM71	0	0	0
CROCC	15	12	3
NRGN	1	1	0
TFG	8	7	1
CD180	7	7	0
WDR77	87	60	27
GGACT	10	5	5
GP6	0	0	0
EHD2	114	80	34
TGFB1	1	1	0
SPTBN4	77	46	31
SELP	3	3	0
CD151	49	30	19
TNXB	12	8	4
ITGA2	74	47	27
HLA-F	66	49	17
CD226	0	0	0
LGALS9	50	37	13
ATP2A1	23	16	7
PDGFB	0	0	0
SLPI	55	25	30
CDH1	31	17	14
NID1	49	33	16
HLA-G	69	48	21
TIMP3	16	11	5
NDST1	4	4	0
ARFIP1	44	28	16
CLINT1	36	25	11
ATP2A3	62	42	20
CHMP4A	8	3	5
NCKAP5	0	0	0
IGKJ4	0	0	0
PLA2G2A	8	4	4
ST6GAL1	6	5	1
PTPRB	3	2	1
CXCL12	4	4	0
PTTG1IP	20	17	3
TMSB10	62	45	17
NAP1L4	99	69	30
CD37	5	5	0
ATP5MF-PTCD1	2	2	0
KCTD12	81	52	29
GTF3C3	11	10	1
TRPM8	0	0	0
KMT2C	0	0	0
HEG1	2	1	1
GALC	0	0	0
HEATR5A	26	18	8
GNPTG	0	0	0
IGLV10-54	5	4	1
IGHV1-45	2	1	1
CDH26	0	0	0
STC2	5	4	1
IGKV1OR2-108	1	0	1
EDDM13	0	0	0
LRBA	81	49	32
LCAT	9	5	4
SELL	1	1	0
ZNF182	0	0	0
MUCL1	0	0	0
CST4	0	0	0
CST1	0	0	0
CCL5	0	0	0
CNTRL	3	3	0
NAV2	0	0	0
PGBD5	1	1	0
IGHE	3	1	2
SULF2	0	0	0
GSTA1	51	25	26
GSTA2	51	25	26
PAICS	79	59	20
MED27	1	1	0
TNN	1	1	0
ANGPTL3	9	8	1
CLCA1	30	17	13
PRPSAP1	49	38	11
CTNND1	104	69	35
DKC1	72	51	21
DNAJA2	103	74	29
GFPT2	71	47	24
GSTM1	96	60	36
RRAS	104	63	41
ADH5	126	83	43
CAPN2	118	79	39
COPB2	119	79	40
LGALS4	43	25	18
PPP2CB	114	76	38
PPP2CA	114	76	38
GFPT1	96	66	30
TARDBP	99	67	32
AIMP2	98	67	31
DPYSL3	117	81	36
TST	43	25	18
AOC3	79	41	38
NUDT16	27	16	11
GPA33	7	4	3
PDLIM7	73	49	24
GRHPR	100	61	39
AKR1C3	96	57	39
DPYSL2	128	86	42
PRMT1	110	73	37
LMF1	24	16	8
IPO5	105	64	41
COPE	101	66	35
USO1	113	71	42
B4GALT2	0	0	0
PMPCB	20	11	9
SF3B1	95	66	29
ALDH1A2	91	51	40
PRPS2	96	66	30
NQO1	66	46	20
ALDH1B1	89	49	40
IARS1	104	71	33
RPS9	108	70	38
ALDH1A3	95	55	40
RPS26	97	67	30
PMPCA	41	27	14
SF3B3	95	69	26
FAM98B	57	45	12
SND1	116	74	42
BZW1	109	72	37
ARHGEF1	89	63	26
EML4	102	70	32
NANS	110	74	36
EIF2B3	87	55	32
FARSB	117	78	39
PARP4	100	68	32
RUVBL1	108	77	31
RPL17	99	70	29
EIF5B	67	50	17
MAP2K7	7	5	2
SP100	18	16	2
GRN	55	44	11
CSNK1G2	12	9	3
C16orf54	1	1	0
INPP5D	24	18	6
CSNK1G1	6	6	0
CCL27	0	0	0
CSNK1G3	12	9	3
CD72	0	0	0
MYCT1	2	2	0
ANGPT1	2	2	0
FAM186B	17	4	13
COG4	22	16	6
EMC2	2	2	0
CPS1	34	21	13
GSTA3	49	24	25
HSD17B13	4	2	2
EXTL2	1	1	0
FBN1	92	56	36
CDH5	0	0	0
PM20D1	1	0	1
KCNN2	1	1	0
AQP1	30	15	15
AASDH	0	0	0
AFTPH	0	0	0
PIP	8	4	4
DDX55	7	6	1
PTCHD4	0	0	0
SAMD11	6	3	3
RGS20	0	0	0
UFSP2	9	7	2
BCAM	18	9	9
CHMP4C	14	12	2
AKAP9	8	7	1
CHMP4B	63	42	21
TMED7	90	56	34
IRAG1	0	0	0
ZNF316	0	0	0
NME3	14	6	8
LIMCH1	22	6	16
KIF15	1	0	1
UNC5B	0	0	0
TTYH3	42	35	7
SCN9A	1	1	0
PTPRA	52	31	21
MCF2L2	0	0	0
IGLV5-48	3	2	1
SLMAP	0	0	0
FGD6	0	0	0
DDX46	67	52	15
MUC7	0	0	0
APP	7	7	0
SCGB2A1	0	0	0
PRSS1	43	24	19
TCN1	5	5	0
LCN1	0	0	0
PRR4	0	0	0
LEG1	0	0	0
BPIFB2	0	0	0
OPRPN	0	0	0
LACRT	0	0	0
ZG16B	3	3	0
PRSS2	36	23	13
NUCB2	27	21	6
PLA2G7	4	2	2
PHF7	0	0	0
PLAT	13	8	5
MUC5B	47	32	15
FAM217B	0	0	0
MUC5AC	37	25	12
CNOT11	2	2	0
REV3L	0	0	0
VPS4A	89	65	24
XPO7	89	60	29
HMBS	2	2	0
LGALS9C	43	32	11
SNX3	86	57	29
VAMP4	1	1	0
LPL	7	4	3
ITGA4	26	18	8
IST1	58	36	22
ATP1B3	50	37	13
GABARAPL2	1	1	0
APOA5	1	1	0
ERMAP	2	1	1
SLC29A1	1	1	0
VAMP8	68	40	28
TM9SF3	76	53	23
ABCB6	4	4	0
FIS1	59	41	18
SLC30A1	10	10	0
CLCN3	4	3	1
MARCHF8	0	0	0
MFGE8	66	48	18
ATP7A	3	3	0
CLCN5	1	1	0
RPIA	0	0	0
CCDC152	0	0	0
NUP188	5	5	0
SAMD9L	29	19	10
GALNT11	0	0	0
TNFRSF10C	0	0	0
XRN1	3	2	1
DPYSL5	13	11	2
STARD3	0	0	0
MARCKS	118	81	37
ADAMTS17	0	0	0
LYVE1	2	0	2
ERCC6	0	0	0
FNBP1L	9	9	0
DLST	51	29	22
PRSS3	15	5	10
IGLV5-52	0	0	0
PRIM1	1	1	0
SLAIN2	0	0	0
ART4	4	4	0
NCKAP1L	71	49	22
ASPDH	6	0	6
KIAA0753	1	1	0
ICAM2	0	0	0
CIRBP	6	5	1
VNN2	28	20	8
SRGN	2	2	0
CD53	32	17	15
BTK	62	38	24
PEAR1	0	0	0
LAMTOR1	40	29	11
SLC44A1	73	47	26
ATP13A1	10	10	0
ABCC6	0	0	0
DNM1L	103	71	32
PRKCB	66	47	19
PRKCA	71	51	20
CLIP1	0	0	0
FKBP1A	36	24	12
CAPNS2	40	28	12
RARRES2	1	0	1
PLCH1	3	2	1
VAMP2	35	25	10
VAMP3	54	38	16
PLXDC2	24	19	5
SNX12	65	44	21
FARP1	91	63	28
RGSL1	0	0	0
PAPLN	0	0	0
CHD8	2	2	0
IGKV1D-8	0	0	0
MUC16	11	10	1
KIAA1958	1	1	0
DNAJC11	1	1	0
EFEMP2	32	20	12
SSC5D	5	3	2
MPDZ	2	2	0
PIP4K2A	80	57	23
STOX1	0	0	0
CENPE	1	1	0
JMJD1C	0	0	0
SLC35D2	0	0	0
EPHA1	0	0	0
SEPTIN8	117	80	37
SEPTIN6	117	79	38
SEPTIN11	120	81	39
ABI2	38	28	10
KALRN	4	4	0
STX6	8	7	1
SH3BGRL	20	12	8
CR1	7	7	0
STAT3	104	67	37
RAB27A	49	27	22
SEPTIN7	122	82	40
LY6G6F	1	1	0
SEPTIN14	116	79	37
SMIM5	1	1	0
TSPAN33	0	0	0
TREML1	1	1	0
ATP6V0A1	38	33	5
MGLL	43	21	22
NAPB	41	30	11
VTI1B	17	15	2
WASF3	34	23	11
RNF11	1	1	0
VTA1	82	55	27
LRRC26	0	0	0
OSBPL5	4	4	0
TSPAN2	16	13	3
TMPRSS2	3	3	0
SPINK5	0	0	0
NAALAD2	1	1	0
SIRPB1	6	5	1
TREH	1	0	1
CTSV	17	15	2
SCGB1D2	1	1	0
PRB2	0	0	0
SMR3B	0	0	0
CSTB	89	57	32
CST2	0	0	0
PI3	1	1	0
LORICRIN	0	0	0
CST5	0	0	0
SPINK7	0	0	0
NPC2	25	15	10
FOLH1	4	3	1
SCGB2A2	0	0	0
WFDC2	0	0	0
PSME4	24	19	5
HEPACAM	0	0	0
ENPP7	32	19	13
GSTA5	51	25	26
CLRN3	0	0	0
SVIP	7	6	1
WFDC12	0	0	0
TMBIM1	4	3	1
ITCH	13	11	2
FNDC11	2	0	2
EPS8L2	53	31	22
HOMER2	0	0	0
SUSD2	64	35	29
CA14	1	1	0
PRB1	1	1	0
ZNF99	7	5	2
CTSH	49	26	23
KLK8	0	0	0
KIF2A	2	2	0
DNM3	100	73	27
PLEKHG1	4	4	0
PRKAR1B	39	27	12
CORO6	5	3	2
STXBP3	90	59	31
NCK2	2	2	0
TNFAIP8	24	14	10
GLUL	93	63	30
CD46	30	22	8
PRKACA	101	68	33
GNAZ	18	8	10
ITGAL	37	26	11
PRKACB	103	71	32
OAS2	48	37	11
GRK4	7	4	3
UBE2N	55	37	18
SUMO2	28	17	11
PIP4K2B	41	30	11
IQGAP2	101	69	32
CNN3	32	20	12
LTB4R	3	3	0
UBE2NL	37	25	12
TAOK1	23	18	5
RASGRP2	1	1	0
PROSER2	0	0	0
C2orf88	2	2	0
PSTPIP2	5	4	1
CD84	1	1	0
CAB39	27	18	9
CDC42BPB	51	40	11
KDM6A	0	0	0
DIAPH1	88	56	32
WIPF1	0	0	0
ALDH1L1	48	30	18
AKR1C4	89	53	36
AKR1C2	94	55	39
AKR1C1	96	57	39
ALDH1L2	35	21	14
COPS7B	64	43	21
ABCA1	2	2	0
ATP2B1	82	56	26
ATP2B4	90	59	31
ATP2B3	72	50	22
LXN	34	25	9
EMILIN2	31	23	8
PCBP2	118	79	39
GGT5	75	43	32
KAT2A	0	0	0
RASSF6	0	0	0
CCDC34	0	0	0
TRAJ61	0	0	0
PRL	0	0	0
NGEF	0	0	0
C22orf31	1	1	0
ATP2A2	71	48	23
TMEM33	4	2	2
SERPINA2	5	5	0
OPTN	1	1	0
ST3GAL5	0	0	0
NIPBL	14	11	3
N4BP2	0	0	0
FCRL3	0	0	0
MCUR1	0	0	0
ITGB7	63	41	22
ITGB5	89	59	30
PIK3CB	19	15	4
ABCE1	103	68	35
TAB3	0	0	0
CD8A	6	3	3
CD3E	3	3	0
PPP1R18	1	1	0
CD82	17	10	7
MARCKSL1	69	57	12
RALGAPB	24	16	8
EMCN	1	1	0
DNPEP	89	52	37
TMC8	0	0	0
RHOV	0	0	0
PCBP3	116	77	39
COQ5	0	0	0
[truncated: 6,909 more rows]
