# Supplementary material for: A novel machine learning algorithm selects proteome signature to specifically identify cancer exosomes
Source: eLife. 2024 Mar 26;12:RP90390. doi: 10.7554/eLife.90390 (PMC10965221; doi:10.7554/eLife.90390)
Supplement: Figure 3—source data 2. [file elife-90390-fig3-data2.csv]

Tiisue	Cell line
ALB	RPS27A
HBB	PKM
HBA1	HSP90AB1
POTEF	CLTC
HBA2	YWHAZ
ACTG1	HSPA5
A2M	ENO1
POTEI	PPIA
ACTG2	HSP90AA1
ACTA1	EEF2
ACTB	YWHAE
PZP	LDHA
POTEJ	TUBA1C
ACTBL2	YWHAQ
POTEKP	GAPDH
HBD	TUBB4B
UBC	TUBB
RPS27A	YWHAB
UBA52	HSP90B1
TUBB	TLN1
RAP1A	GNB1
TUBA1A	EZR
PFN1	YWHAG
YWHAZ	CFL1
TUBB4B	MYH9
TUBA3C	TPI1
TUBB2A	AHCY
TUBA1C	EIF4A1
TUBB2B	GDI2
VTN	THBS1
GAPDH	PFN1
EEF1A1	MSN
EEF1A2	FASN
RAB1A	RAP1B
RAB1B	RAB35
ENO1	SDCBP
HSPA8	PGK1
FTH1	ALDOA
PPIA	PDCD6IP
RAB10	CLIC1
H2BC12	ACLY
H2BC5	PGD
H2BC10	FLNA
TUBB3	RHOA
H2BC18	TUBA4A
H2BC15	LDHB
MSN	RAB10
GSN	RAB7A
RAB8A	WDR1
RAB8B	CCT3
HSP90AA1	EHD1
HSP90AB1	DYNC1H1
PKM	CCT4
CAP1	KPNB1
HSPA1A	RAB1B
HSP90B1	CAP1
EZR	ATIC
HSPA2	RDX
CFL1	ACTN1
RAB35	IQGAP1
H2BC21	ATP1A1
H2BU1	GNAI2
RHOA	PRDX1
CDC42	TAGLN2
YWHAB	UBA1
CLTC	CDC42
YWHAH	EEF1G
IGKC	RAB1A
IGHM	CCT2
TLN1	TCP1
FLNA	ACTN4
TUBB4A	ARF4
IGHG1	MYL6
H2AC7	RAB5C
H2AC6	PPP2R1A
H2BC1	CCT6A
H2AC12	PPP1CA
TUBA8	CCT5
CALM1	GNAI3
RHOC	PDIA3
PRDX1	CLIC4
	RPSA
	RPS2
	ANXA5
	RAB14
	HNRNPK
	DSTN
	PSMD2
	PTGES3
	CCT7
	MYH10
	YWHAH
	PYGB
	EHD4
	ADK
	ACTR3
	PYGL
	TFRC
	NAP1L1
	PPP1CB
	LOC105378936
	COL6A1
	PCBP1
	TUBB3
	MTHFD1
	FLOT2
	PSMD13
	EEF1A2
	ILK
	RPS4X
	VPS35
	CAND1
	PFKL
	PDCD6
	UGDH
	CAPZA1
	CBR1
	FLOT1
	STOM
	VCP
	SFN
	IDH1
	PABPC1
	TSG101
	CCT8
	RAB2A
	GSTP1
	ADH5
	CORO1C
	VCL
	PSMD11
	ALDH9A1
	PSMD12
	PGM1
	PRDX6
	CAPZB
	PAICS
	GFPT1
	TKT
	CYFIP1
	PFKP
