# Supplementary material for: A novel machine learning algorithm selects proteome signature to specifically identify cancer exosomes
Source: eLife. 2024 Mar 26;12:RP90390. doi: 10.7554/eLife.90390 (PMC10965221; doi:10.7554/eLife.90390)
Supplement: Figure 4—source data 1. [file elife-90390-fig4-data1.csv]

gene	CASE1	CASE2	CASE3	CASE4	CASE5	CASE6	CASE7	CASE8	CASE9	CASE10	CASE11	CASE12	CASE13	CASE14	CASE15	MS13489QE.Bruno.Lyden.GCTexo.A	MS13489QE.Bruno.Lyden.GCTexo.B	MS13489QE.Bruno.Lyden.GCTexo.C	MS14699QE.Bruno.Lyden.Mel01	MS151649QE.Bruno.Lyden.control1.mom	MS151649QE.Bruno.Lyden.control2.dad	MS151726QE.Bruno.Lyden.Kelly	MS151970QE.Bruno.Lyden.control.dad.Jon	MS151970QE.Bruno.Lyden.control.mom.HZ	MS152063QEp.Bruno.Lyden.CF27	MS152063QEp.Bruno.Lyden.CF33	MS152072QEp.Jonathan.Jarnagin.patient1.RB.peripheral.vein	MS152072QEp.Jonathan.Jarnagin.patient2.NS.peripheral.vein	MS152072QEp.Jonathan.Jarnagin.patient3.JD.peripheral.vein	MS162175QEp.Bruno.Lyden.CF1	MS162175QEp.Bruno.Lyden.CF110	MS162175QEp.Bruno.Lyden.CF25	MS162175QEp.Bruno.Lyden.CF37	MS162175QEp.Bruno.Lyden.CF5	MS162577QEp.Ayuko.Lyden.autism.HG.1	MS162577QEp.Ayuko.Lyden.autism.HG.2	MS162577QEp.Ayuko.Lyden.autism.HG.3	MS162577QEp.Ayuko.Lyden.control.AH.1	MS162577QEp.Ayuko.Lyden.control.AH.2	MS162577QEp.Ayuko.Lyden.control.AH.3	MS162778QEp.Ayuko.Lyden.C11	MS162778QEp.Ayuko.Lyden.C11M	MS162778QEp.Ayuko.Lyden.C14	MS162778QEp.Ayuko.Lyden.C14D	MS162778QEp.Ayuko.Lyden.C17	MS162778QEp.Ayuko.Lyden.C17D	MS162778QEp.Ayuko.Lyden.C17M	MS162879QEp.Ayuko.Lyden.WE002.plasma	MS162879QEp.Ayuko.Lyden.WE004.plasma
control	Cancer	Cancer	Cancer	Cancer	Cancer	Cancer	Cancer	Cancer	Cancer	Cancer	Cancer	Cancer	Cancer	Cancer	Cancer	Cancer	Cancer	Cancer	Cancer	Control	Control	Cancer	Control	Control	Cancer	Cancer	Cancer	Cancer	Cancer	Cancer	Cancer	Cancer	Cancer	Cancer	Control	Control	Control	Control	Control	Control	Control	Control	Control	Control	Control	Control	Control	Cancer	Cancer
ITIH4	4.810756582	5.056950564	4.941774712	5.687065883	4.211681076	5.715340539	5.774679704	6.03740538	5.967073175	6.628008219	6.029552592	5.5544407	5.970601148	0	6.161883458	7.880813598	7.913813858	7.792391697	9.041392686	8.939519253	9	8.278753603	9.146128036	8.763427994	9.041392686	9.51851394	0	7.623249301	7.361727855	8.977723606	8.963787828	9	9.322219295	9.544068044	8.832508913	9.230448922	8.86923172	8.568201725	8.602059992	8.477121256	8.612783858	8.491361695	8.892094603	8.707570177	8.623249291	8.95424251	8.716003344	7.851258355	8.681241238
C1QB	0	0	0	0	0	0	0	0	0	4.587497693	0	0	4.836963059	0	0	8.79239169	8.934498452	8.973127854	8.477121256	9.716003344	9.531478917	9.447158031	9.934498451	9.973127854	10.17609126	9.986771734	7.740362697	8.447158033	8.278753603	9.230448922	9.176091259	9.568201724	9.146128036	8.748188028	9.397940009	9.579783597	9.278753601	9.431363764	9.602059991	9.491361694	9.447158031	9.698970004	9.72427587	9.939519253	9.591064607	10	9.982271233	9.531478917	9.491361694
HBD	0	0	0	0	0	0	0	6.504331648	0	4.752209837	5.6662193	0	5.620719929	0	6.400298068	9.397940009	9.431363764	9.397940009	10.32221929	9.505149978	10.34242268	9.041392686	9.74036269	10.07918125	9.826074803	9.995635195	9.785329835	10.39794001	9.84509804	9.903089987	9.748188027	9.653212514	11.23044892	10.70757018	9.924279286	10.25527251	10.20411998	9.568201724	9.342422681	9.113943353	9.176091259	9.079181246	9.113943353	9.77815125	9.505149978	9.477121255	9.322219295	9.113943353	9.51851394
KLKB1	0	0	0	0	0	0	4.282282156	0	4.408901082	0	4.700539312	0	0	0	2	7.176091288	7.53147893	7.414973365	0	8.380211244	8.602059992	7.301030017	8.361727838	8.230448924	8.342422683	8.707570177	0	7.568201736	7.633468466	8.50514998	8.342422683	8.431363766	9.380211242	9.51851394	8.176091262	7.857332502	8.041392689	8.000000004	7.892094608	7.995635199	7.880813598	7.959041397	8.278753603	8.113943356	7.623249301	8.146128039	7.892094608	7.414973365	8.07918125
CLU	4.906884298	4.215531818	5.123538052	5.106160288	4.755188586	6.007142843	5.939504277	5.68678905	5.764170152	5.962388753	4.562780428	5.371470553	5.716780203	5.579533234	5.882820418	8.431363766	8.447158033	8.176091262	7.986771739	9.176091259	9.113943353	7.838849097	8.690196081	9.230448922	8.95424251	9.544068044	8.431363766	8.462397999	8.544068046	8.602059992	8.903089988	9.113943353	9.812913357	9.633468456	8.959041393	9.301029996	8.944482673	8.857332497	8.681241238	8.623249291	9.113943353	9.176091259	9.113943353	9.041392686	9.204119983	9.278753601	9.176091259	8.342422683	8.913813853
APOC1	0	0	0	0	0	0	4.929730484	4.105544246	0	4.672384213	0	4.089587219	0	0	4.32962158	7.612783867	7.785329842	7.43136378	0	9.322219295	9.204119983	8.07918125	8.819543936	8.681241238	10.25527251	9.591064607	8.278753603	8.255272508	7.857332502	8.50514998	8.447158033	8.380211244	9.041392686	8.929418926	8.653212515	9.079181246	8.79934055	9.041392686	9	8.919078093	8.934498452	8.623249291	8.913813853	8.681241238	8.278753603	8.74036269	8.707570177	8.447158033	8.531478918
APOL1	5.404594276	4.275794915	4.380952528	5.00765818	5.105159201	5.705616573	6.275325408	6.039585027	5.25712876	5.187974519	5.555141626	5.458535117	6.179563568	5.982900956	5.956491149	7.973127858	8.041392689	8.000000004	7.591064618	9.146128036	8.698970005	8.07918125	9.146128036	9.041392686	8.959041393	8.491361695	7.763428001	7.939519258	7.38021126	8.662757833	8.838849091	8.531478918	8.826074803	8.491361695	8.79239169	9.079181246	8.832508913	8.681241238	8.819543936	8.602059992	8.322219297	9	8.653212515	9.204119983	8.361727838	9.342422681	8.908485019	8.812913357	8.50514998
KNG1	5.393438313	5.532449884	5.302443493	5.021267879	4.907712253	5.822164155	6.361273099	5.820433985	6.174827943	5.389848011	5.87232005	5.917794768	6.210630682	6.219741923	5.935282503	7.939519258	7.851258355	7.819543942	8.579783598	9.204119983	9.204119983	7.851258355	9.301029996	8.832508913	8.845098041	9.591064607	0	7.505149992	6.740362768	9.322219295	9.230448922	8.886490726	10	10.11394335	8.785329836	9	8.544068046	8.230448924	8.477121256	8.230448924	8.919078093	8.591064608	9.146128036	9	8.819543936	9.146128036	8.531478918	8.146128039	8.857332497
IGHG2	5.401121262	4.533403425	4.963726455	4.365225832	4.940072999	5.670617814	5.455090129	5.950014161	4.809566448	5.633509863	0	4.284904251	5.815159854	0	4.924077603	9.612783857	9.623249291	9.602059991	8.556302502	10.71600334	10.89762709	10.14612804	11.04139269	11.04139269	10.83250891	10.8260748	9.707570176	9.462397998	9.707570176	10.77085201	10.75587486	10.88081359	10.88649073	10.51851394	10.07918125	10.07918125	10.07918125	10.39794001	10.51851394	10.54406804	10.04139269	10.41497335	10.462398	10.50514998	10.04139269	10.63346846	10.47712125	9.662757832	10.17609126
IGHA1	5.755768936	5.813034274	6.026232055	5.627311566	6.484719549	6.454933691	6.519605016	6.679589682	6.500021059	6.653783284	6.669814221	6.351766168	6.919108597	7.464697837	6.364325066	8.643452677	8.662757833	8.662757833	8.633468457	10.07918125	10.39794001	9.72427587	10.47712125	10.63346846	10.11394335	10.41497335	10.14612804	9.86923172	10.23044892	10.66275783	10.59106461	10.73239376	9.954242509	10.07918125	10.07918125	10.07918125	9.944482672	10	10.07918125	9.939519253	9.851258349	10.32221929	10.20411998	10.61278386	10.38021124	10.5797836	10.43136376	9.857332496	10.11394335
APOA1	4.887290894	4.54430374	6.24685493	5.880833592	6.441614709	6.402359582	8.16494431	6.198423385	6.313991166	7.119680703	7.676320413	6.820480803	7.222202321	7.670912642	7.446033724	8.924279287	8.95424251	8.959041393	8.897627092	10.62324929	10.462398	9.447158031	10.66275783	10.30103	10.30103	10.63346846	8.845098041	9.447158031	8.662757833	10.43136376	10.47712125	10.23044892	10.5797836	10.11394335	10.11394335	10.20411998	10.07918125	10.11394335	10.07918125	10.07918125	10.25527251	10.14612804	10.30103	10.20411998	9.662757832	10.30103	10.11394335	9.77815125	9.934498451
APOE	6.372059877	6.138913124	6.743548881	7.430727105	7.536515263	7.170246104	8.309230963	7.171717797	7.570815654	8.220361409	7.811072958	7.483513482	7.867054747	7.911230623	7.917636555	7.939519258	7.826074809	7.799340556	8.755874856	9.113943353	9.041392686	7.681241246	8.880813593	8.544068046	9.991226076	9.204119983	7.845098046	0	7.755874863	8.176091262	8.491361695	8.431363766	8.875061264	8.255272508	8.301029998	8.672097859	8.278753603	8.278753603	8.176091262	8.322219297	8.612783858	7.544068057	8.204119985	8.230448924	8.041392689	8.278753603	8.447158033	7.792391697	7.53147893
APOC3	6.146083984	7.312787522	7.028634806	7.472846487	7.223344184	6.902671614	7.952341317	8.534013815	6.573650195	7.787736302	8.498337896	7.280818827	8.044028431	7.021744964	8.271032569	8.602059992	8.491361695	8.462397999	8.39794001	10.462398	10.11394335	8.041392689	9.447158031	9.176091259	10.47712125	9.591064607	7.707570185	7.361727855	0	9.204119983	8.838849091	9.230448922	9.079181246	9.041392686	9.079181246	9	9.079181246	8.623249291	8.643452677	8.50514998	9.301029996	9.041392686	9.204119983	9.255272505	8.857332497	8.763427994	9.041392686	8.897627092	9.278753601
C1QC	0	0	0	0	0	0	0	0	0	0	0	0	5.593730105	4.193152437	0	9.176091259	9.230448922	9.230448922	8.838849091	9.763427994	9.431363764	9.230448922	10	10.11394335	9.86332286	10.07918125	0	8.255272508	6.770852085	9.612783857	9.591064607	9.74036269	9.361727836	8.892094603	9.301029996	9.397940009	9.380211242	9.414973348	9.505149978	9.477121255	9.113943353	9.591064607	9.643452677	9.653212514	9.414973348	9.886490725	9.763427994	9.113943353	9.361727836
APOH	0	0	0	0	0	4.803327354	5.254767948	4.724693575	4.211520997	0	0	0	4.415157049	4.814587172	4.944309907	7.322219315	7.079181282	7.255272529	8.380211244	9.255272505	9.176091259	8.146128039	9.041392686	8.838849091	8.857332497	9.531478917	0	8.041392689	7.301030017	9.301029996	9.176091259	9.278753601	9.255272505	9.361727836	9.230448922	9.113943353	8.949390007	8.204119985	8.230448924	7.838849097	8.643452677	8.72427587	8.431363766	8.623249291	8.146128039	8.672097859	8.361727838	7.322219315	8.826074803
AMBP	3.921686475	0	0	4.968581004	0	4.972670217	4.694877096	5.137736957	4.819550516	5.397750615	4.547171442	5.103533485	5.100373992	0	4.625322742	7.653212523	7.342422701	7.579783608	7.643452686	9.230448922	9.176091259	8.255272508	9.230448922	9	8.977723606	9.602059991	0	7.886490731	6.875061321	9.204119983	9.041392686	8.633468457	9.949390007	9.301029996	8.653212515	8.857332497	8.633468457	8.579783598	8.431363766	8.544068046	8.690196081	8.544068046	8.913813853	8.785329836	8.50514998	8.986771735	8.698970005	7.929418931	8.662757833
C4BPA	3.986816505	0	0	4.670876421	0	4.178718019	0	5.10500236	4.554755591	3.724439723	0	5.440573791	4.976721286	5.416142697	4.296248243	9.113943353	9.041392686	8.949390007	8.342422683	10.17609126	9.77815125	9.361727836	10.30103	10.17609126	10.20411998	10.49136169	8.380211244	9.698970004	9.176091259	10.04139269	10.14612804	10.2787536	9.886490725	9.544068044	9.633468456	9.716003344	9.612783857	9.77815125	9.875061263	9.69019608	9.707570176	10.07918125	9.934498451	10.14612804	10.20411998	10.20411998	10.32221929	9.968482949	9.892094603
APOB	7.89865372	7.316216061	6.577342069	7.875041065	7.558994487	7.813339618	8.649825202	7.684738058	8.214557665	8.452632329	7.648200122	8.568967019	7.781368199	8.565978822	7.443591753	7.623249301	7.869231726	7.763428001	8.041392689	9.278753601	9.431363764	7.146128067	8.880813593	8.819543936	10.25527251	9.146128036	0	7.361727855	0	8.755874856	8.612783858	8.602059992	9	8.462397999	8.462397999	9	8.591064608	8.431363766	8.431363766	8.41497335	9.146128036	8.602059992	8.986771735	8.963787828	8.556302502	9	8.643452677	8.278753603	8.361727838
HRG	0	0	3.99895644	0	4.357572784	4.610915555	0	4.315361487	5.008204017	4.267969159	4.319959229	4.662011337	4.604776674	5.048484532	5.096982968	7.838849097	7.763428001	7.826074809	7.518513953	9.113943353	8.968482949	7.079181282	9.146128036	8.963787828	8.973127854	9.322219295	7.949390012	7.806179981	0	9.204119983	9.113943353	9.079181246	10.30103	10.41497335	8.491361695	8.146128039	8.39794001	8.41497335	8.39794001	8.255272508	8.591064608	8.431363766	8.72427587	8.361727838	8.176091262	8.86923172	8.556302502	7.995635199	8.556302502
APOD	5.364083619	4.395151592	5.739258178	5.328654773	6.509694757	6.322904732	5.842522497	5.954657786	6.201340034	6.54638977	6.753601135	6.474992491	6.670053812	5.475822221	6.717476691	7.939519258	0	0	0	8.806179975	8.612783858	0	8.863322861	8.278753603	8.968482949	8.982271233	0	6.748188105	0	8.579783598	8.778151251	8.255272508	8.602059992	8.544068046	8.230448924	8.447158033	8.176091262	7.662757841	8.176091262	8.07918125	8.113943356	8.361727838	7.633468466	8.41497335	7.462398013	8.579783598	7.863322866	7.176091288	7.230448947
APOA4	4.497081763	0	0	0	0	0	6.163683348	4.613323741	4.862196996	0	0	4.316829691	0	4.262712063	5.092966138	7.579783608	7.43136378	7.447158047	8.322219297	9	8.986771735	7.146128067	9.079181246	8.518513941	8.672097859	9.079181246	0	0	0	8.716003344	8.79934055	8.568201725	9.041392686	8.568201725	8.643452677	8.986771735	8.707570177	8.113943356	8.07918125	8.07918125	8.939519253	8.50514998	8.74036269	8.892094603	8.491361695	8.778151251	8.39794001	7.732393768	8.230448924
C1S	3.856789289	4.711984284	4.545071965	0	4.814653724	5.371808303	4.733365813	5.233658476	5.326882482	5.320289642	4.39795738	5.444982671	5.679428805	5.338856737	5.994320233	6.799340618	0	0	0	8.322219297	8.322219297	7.278753624	8.50514998	8.07918125	8.50514998	9.079181246	6.892094658	7.322219315	6.707570261	8.770852012	8.602059992	8.785329836	8.995635195	8.176091262	8.204119985	8.322219297	8.204119985	7.863322866	7.851258355	7.806179981	7.995635199	7.869231726	8.230448924	8.113943356	7.892094608	8.477121256	8.07918125	7.176091288	7.880813598
ITIH2	5.193592048	4.697046168	4.317394675	5.638171657	4.75466171	6.053591223	6.061945681	5.717616421	5.978995823	6.536531298	6.026888971	5.91624491	5.493584905	5.966334657	5.671586568	7.755874863	7.748188035	7.568201736	9.716003344	9.278753601	9.278753601	8.301029998	9.255272505	9.113943353	9.113943353	9.707570176	0	7.672097867	7.113943386	9.322219295	9.176091259	9.255272505	10.32221929	9.79239169	8.806179975	9.041392686	8.857332497	8.716003344	8.778151251	8.662757833	8.785329836	8.806179975	9.041392686	8.913813853	8.591064608	8.977723606	8.880813593	8.278753603	8.785329836
ITIH1	5.233676226	4.735622849	4.674245531	5.716963575	4.562780428	5.990392583	5.754052334	5.832091023	6.045995419	6.360714938	5.641078306	5.707186806	5.932002177	5.51413717	5.909754946	7.518513953	7.544068057	7.43136378	8.79239169	9.113943353	8.95424251	8.230448924	9.230448922	8.934498452	8.939519253	9.397940009	0	7.591064618	6.740362768	9.176091259	8.778151251	9	9.963787827	9.51851394	8.672097859	8.944482673	8.633468457	8.602059992	8.591064608	8.579783598	8.447158033	8.579783598	8.826074803	8.531478918	8.230448924	8.74036269	8.491361695	8.000000004	8.591064608
PON1	4.865109899	3.929265618	0	0	4.389325592	5.43284267	6.137281617	0	5.526655835	4.7704175	0	5.209249531	5.192681726	5.20531536	5.576745505	7.518513953	7.518513953	7.505149992	7.505149992	8.491361695	8.301029998	7.591064618	8.74036269	8.07918125	8.785329836	8.832508913	0	7.146128067	0	8.763427994	8.278753603	8.230448924	9.146128036	8.477121256	8.518513941	8.832508913	8.531478918	7.505149992	7.832508919	7.544068057	8.113943356	8.322219297	8.431363766	8.176091262	7.892094608	8.491361695	8.204119985	7.698970013	7.886490731
PRDX2	0	0	4.616947887	3.734239604	3.937417581	0	5.055229208	4.796414739	0	5.42952781	5.122251931	4.996778646	5.009964776	0	4.359095224	7.041392725	6.447158186	6.857332557	0	0	8.301029998	8.342422683	9.342422681	0	0	0	7.414973365	8.518513941	7.838849097	8.301029998	7.986771739	7.623249301	8.462397999	8.623249291	8.568201725	8.579783598	8.544068046	7.968482953	7.690196089	7.763428001	0	8.07918125	0	7.462398013	6.531479045	7.38021126	7.20412001	8.579783598	7.20412001
HBB	5.256152266	5.302133871	5.436428233	5.05447133	5.082325708	5.655235468	7.312232423	7.253993218	4.895383867	5.823246589	7.124035214	4.958850452	6.662068551	5.823963676	7.106762654	9.633468456	9.579783597	9.643452677	10.38021124	9.681241237	10.51851394	9.278753601	10.07918125	10.07918125	9.770852012	10.11394335	10.11394335	10.49136169	10.14612804	9.986771734	9.681241237	10.04139269	11.25527251	11.04139269	10.32221929	10.38021124	10.34242268	9.568201724	9.505149978	9.447158031	9.491361694	9.462397998	9.255272505	9.913813852	9.602059991	9.785329835	9.653212514	9.278753601	9.643452677
ECM1	0	0	0	0	0	0	4.116972823	4.617430227	0	4.691885651	4.528415302	0	0	4.382755256	4.676153835	8.968482949	9	8.968482949	0	8.633468457	8.447158033	8.146128039	8.041392689	8.72427587	8.301029998	8.778151251	0	7.602060002	7.079181282	8.579783598	8.255272508	8.653212515	7.146128067	7.785329842	8.041392689	8.146128039	8.041392689	8.07918125	8.113943356	8.113943356	6.968482995	7.518513953	7.690196089	8.556302502	0	8.204119985	8.204119985	8.477121256	8.278753603
IGHM	0	5.479995438	5.483233442	0	0	6.066514886	5.239704798	5.247686095	5.921074912	6.259615617	5.495753803	5.358111957	6.457479345	5.979796407	5.935743998	10.11394335	10.17609126	10.17609126	10.04139269	10.91907809	10.83250891	10.20411998	11.2787536	11.20411998	10.77815125	10.74818803	10.69019608	10.8573325	10.32221929	10.98227123	11	11.07918125	10.62324929	10.76342799	10.69019608	10.77085201	10.66275783	10.83250891	10.77815125	10.74818803	11	11.07918125	10.8260748	11	10.92941893	11.07918125	11.04139269	10.80617997	10.2787536
IGHG3	0	3.845346137	4.827743949	4.906663602	4.388118971	5.18030082	4.481886729	4.938324549	4.323891208	0	5.069301715	5.181274633	5.098356408	0	4.009535877	9.826074803	9.819543936	9.806179974	9.079181246	10.60205999	10.77085201	10.39794001	11.04139269	10.96378783	10.93449845	10.97312785	10	10	9.77815125	10.86332286	10.74036269	11	10.97772361	10.70757018	10.14612804	10.32221929	10.11394335	10.39794001	10.23044892	10.50514998	10.51851394	10.53147892	10.79239169	10.70757018	10.54406804	10.8573325	10.59106461	10.04139269	10.49136169
APOA2	0	4.109240969	3.700270937	5.04267	3.907034952	4.884744401	5.478596794	6.047592195	0	5.541293364	6.04304027	4.421653276	5.674917146	5.13335046	6.770944087	8.204119985	8.204119985	8.176091262	8.07918125	10.14612804	9.954242509	8.531478918	10.11394335	9.770852012	9.707570176	9.505149978	8.146128039	8.531478918	7.778151258	9.806179974	9.653212514	9.505149978	9.79239169	9.301029996	9.602059991	9.707570176	9.681241237	9.544068044	9.568201724	9.255272505	9.806179974	9.505149978	9.806179974	9.591064607	9.146128036	9.672097858	9.477121255	8.913813853	9.041392686
C1R	0	0	0	0	0	0	4.121264305	0	0	4.790010564	0	3.787956123	4.319022733	0	4.689495326	8.176091262	8.176091262	8.176091262	8.000000004	8.913813853	8.79239169	8.278753603	9.322219295	9.041392686	9.322219295	9.414973348	0	7.505149992	7.662757841	8.875061264	9.079181246	9.361727836	8.778151251	8.755874856	8.812913357	9.146128036	8.949390007	8.531478918	8.591064608	8.50514998	9.113943353	9.322219295	9.113943353	9.079181246	9.278753601	9.748188027	9.079181246	8.230448924	8.939519253
A1BG	4.028123715	5.107813491	5.206169893	5.283710449	5.285284946	5.496629411	5.515859279	5.790118312	6.00623664	6.008881946	6.106623616	6.153813341	6.188869731	6.59088094	6.694223291	0	0	0	9.278753601	9.342422681	9.113943353	7.724275878	9.041392686	8.770852012	8.929418926	9.380211242	7.755874863	8.113943356	7.301030017	8.919078093	8.806179975	8.863322861	8.949390007	8.176091262	8.732393761	8.568201725	8.79934055	8.623249291	8.591064608	8.531478918	8.785329836	8.556302502	8.959041393	8.518513941	8.301029998	8.95424251	8.643452677	7.653212523	8.602059992
TLN1	0	0	0	0	0	6.150619224	0	0	0	6.368033302	0	3.902601131	0	5.296796775	0	0	0	5.770852748	7.875061269	8.146128039	8.973127854	7.770852019	7.845098046	8.361727838	7.113943386	0	0	0	6.579783711	7.740362697	0	7.623249301	8.204119985	7.591064618	8.732393761	8.838849091	8.716003344	7.579783608	7.612783867	7.447158047	0	0	0	0	0	0	0	7.612783867	0
FBLN1	0	0	0	0	0	0	0	0	0	3.57989787	4.316410711	0	0	4.668674729	0	0	0	0	8.041392689	7.602060002	7.755874863	0	8.204119985	7.643452686	7.806179981	8.380211244	0	0	0	8.544068046	8.447158033	7.959041397	0	7.763428001	7.518513953	7.845098046	7.698970013	7.707570185	7.623249301	7.672097867	7.819543942	7.38021126	7.770852019	7.755874863	7.973127858	7.875061269	0	7.079181282	7.633468466
APOM	4.718792229	0	5.409207567	5.256522919	5.66407759	5.163027129	5.221129832	5.637550767	5.540986052	5.215455137	5.504336272	6.590346202	6.333616727	5.817235392	6.151501927	0	0	0	8.763427994	8.146128039	7.53147893	0	7.763428001	7.38021126	8.913813853	8.698970005	0	7.414973365	0	7.97772361	8.113943356	8.278753603	8.602059992	8.204119985	8.176091262	8.204119985	8.278753603	7.778151258	8.041392689	8.000000004	8.518513941	8.255272508	8.491361695	8.255272508	8.113943356	8.491361695	8.230448924	0	7.869231726
MYH9	3.856124444	0	0	0	4.537579853	5.864612523	0	4.281737672	0	5.272215357	0	4.547294625	0	0	0	0	0	0	7.602060002	7.301030017	7.707570185	8.531478918	7.724275878	8.301029998	7.113943386	0	0	0	0	7.924279291	0	7.505149992	9.113943353	8.845098041	9.041392686	9.397940009	9	7.612783867	7.447158047	7.43136378	0	0	0	0	0	0	0	0	0
ITIH3	4.308799104	0	4.45496675	0	0	0	4.850872818	0	4.907739108	5.41154395	4.817360403	0	4.594845395	0	0	0	0	0	9.204119983	8.146128039	7.491361708	7.000000043	7.99122608	7.20412001	7.414973365	8.74036269	0	0	0	7.857332502	7.851258355	7.255272529	9.204119983	8.963787828	7.462398013	7.826074809	7.342422701	7.079181282	7.176091288	7.113943386	7.806179981	7.707570185	8.176091262	7.230448947	8.000000004	7.908485024	0	0	7.740362697
LDHB	0	0	0	0	0	0	0	4.560874632	0	4.740212635	0	0	4.261762318	0	0	0	0	0	7.875061269	7.079181282	7.826074809	7.812913363	7.113943386	7.447158047	0	0	0	6.939519303	0	0	0	0	7.643452686	0	7.447158047	7.653212523	7.447158047	6.65321261	6.27875383	0	0	0	0	0	0	0	0	0	0
ACLY	0	0	3.89580915	0	4.815451559	0	4.851692426	0	0	0	0	0	4.886157827	4.959237019	0	0	0	0	0	7.763428001	0	6.913813905	0	0	0	0	0	0	0	0	0	0	7.447158047	6.799340618	7.113943386	7.146128067	6.869231778	0	0	0	0	0	0	0	0	0	0	0	0
APOC4	0	6.056856467	0	4.131650738	0	0	7.227381679	7.488908115	0	6.804142296	7.48921986	6.273937643	7.377646248	0	7.492485328	0	0	0	0	8.812913357	8.39794001	0	0	0	9.568201724	7.973127858	0	0	0	0	0	0	0	0	0	0	0	0	7.361727855	0	6.869231778	0	0	0	0	0	7.146128067	0	6.785329906
APOF	4.653800825	4.279233346	5.038981592	0	5.333408982	5.282230006	6.469527627	4.739105365	5.886581523	5.423673403	5.613028476	5.42037003	6.510165641	6.683740365	4.62253522	0	0	0	0	8.204119985	7.38021126	0	0	0	6.477121399	6.612783963	0	6.568201841	0	7.778151258	0	0	7.397940026	6.806180042	7.880813598	8.000000004	7.799340556	7.544068057	7.602060002	7.556302513	7.698970013	7.518513953	7.505149992	0	7.079181282	7.568201736	7.414973365	0	7.38021126
CNDP1	0	0	0	0	0	0	4.005223425	0	0	0	0	0	0	5.000351636	0	0	0	0	0	7.43136378	7.397940026	0	0	0	0	7.579783608	0	0	0	7.079181282	0	0	7.851258355	0	0	0	0	0	0	0	0	0	7.079181282	6.6020601	0	0	0	0	0
MMRN1	0	0	0	4.145848757	0	0	4.644960217	0	0	4.709448053	0	0	0	0	0	0	0	0	0	0	7.579783608	0	8.204119985	0	7.176091288	0	0	0	0	7.792391697	0	7.579783608	0	0	8.278753603	8.913813853	8.39794001	0	0	0	7.491361708	7.301030017	0	8.041392689	8.322219297	0	7.591064618	6.982271278	0
CAMP	4.021644036	0	0	0	0	0	0	5.456701495	0	0	4.789940125	0	5.364027275	0	5.909888041	0	0	0	0	0	0	0	0	0	8.113943356	0	0	0	6.591064718	0	0	0	8.278753603	8.146128039	0	0	0	0	0	0	0	0	0	0	0	0	0	0	0
APMAP	0	0	0	0	0	0	0	0	4.193263773	0	0	0	0	0	0	0	0	0	0	0	0	0	0	0	0	0	0	0	0	0	0	0	7.949390012	7.785329842	0	0	0	0	0	0	0	0	0	0	0	0	0	0	0
[truncated: 207 more columns]
