# Supplementary material for: A novel machine learning algorithm selects proteome signature to specifically identify cancer exosomes
Source: eLife. 2024 Mar 26;12:RP90390. doi: 10.7554/eLife.90390 (PMC10965221; doi:10.7554/eLife.90390)
Supplement: Figure 5—source data 1. [file elife-90390-fig5-data1.csv]

gene	CASE1	CASE2	CASE3	CASE4	CASE5	CASE6	CASE7	CASE8	CASE9	CASE10	CASE11	CASE12	CASE13	CASE14	CASE15	MS152063QEp.Bruno.Lyden.CF27	MS152063QEp.Bruno.Lyden.CF33	MS152072QEp.Jonathan.Jarnagin.patient1.RB.peripheral.vein	MS152072QEp.Jonathan.Jarnagin.patient2.NS.peripheral.vein	MS152072QEp.Jonathan.Jarnagin.patient3.JD.peripheral.vein	MS162175QEp.Bruno.Lyden.CF1	MS162175QEp.Bruno.Lyden.CF110	MS162175QEp.Bruno.Lyden.CF25	MS162175QEp.Bruno.Lyden.CF37	MS162175QEp.Bruno.Lyden.CF5	MS162879QEp.Ayuko.Lyden.WE002.plasma	MS162879QEp.Ayuko.Lyden.WE004.plasma	MS162879QEp.Ayuko.Lyden.WE005.plasma	MS183815QEp.Linda.Lyden.11.cancer	MS183815QEp.Linda.Lyden.23.cancer	MS183815QEp.Linda.Lyden.29.cancer	MS183815QEp.Linda.Lyden.42.cancer	MS183815QEp.Linda.Lyden.43.cancer	MS183815QEp.Linda.Lyden.9.cancer	MS183871QEp.Goncalo.Lyden.53.plasma	MS183871QEp.Goncalo.Lyden.55.plasma	MS183871QEp.Goncalo.Lyden.57.plasma	MS183871QEp.Goncalo.Lyden.58.plasma	MS194879LUM.goncalo.lyden.127.Plasma.a	MS194879LUM.goncalo.lyden.128.Plasma.a	MS194879LUM.goncalo.lyden.130.Plasma.a	MS194879LUM.goncalo.lyden.131.Plasma.a	MS194879LUM.goncalo.lyden.135.Plasma.a	MS194879LUM.goncalo.lyden.137.Plasma.a	MS194879LUM.goncalo.lyden.141.Plasma.a	MS194879LUM.goncalo.lyden.142.Plasma.a	OLI1	OLI2	OLI3
group	Lung	Lung	Lung	Lung	Lung	Lung	Lung	Lung	Lung	Lung	Lung	Lung	Lung	Lung	Lung	Breast	Breast	Pancreas	Pancreas	Pancreas	Breast	Breast	Breast	Breast	Breast	Colorectal	Colorectal	Colorectal	Pancreas	Pancreas	Pancreas	Pancreas	Pancreas	Pancreas	Lung	Lung	Lung	Lung	Lung	Lung	Lung	Lung	Lung	Lung	Lung	Lung	Glioma	Glioma	Glioma
ITIH4	4.810756582	5.056950564	4.941774712	5.687065883	4.211681076	5.715340539	5.774679704	6.03740538	5.967073175	6.628008219	6.029552592	5.5544407	5.970601148	0	6.161883458	9.041392686	9.51851394	0	7.623249301	7.361727855	8.977723606	8.963787828	9	9.322219295	9.544068044	7.851258355	8.681241238	8.643452677	7.968482953	7.785329842	8.146128039	8.146128039	7.53147893	7.908485024	8.653212515	8.681241238	8.826074803	8.447158033	8.944482673	8.778151251	8.973127854	8.707570177	8.863322861	8.826074803	8.934498452	9.113943353	6.77247	6.561722	6.628316
C1QB	0	0	0	0	0	0	0	0	0	4.587497693	0	0	4.836963059	0	0	10.17609126	9.986771734	7.740362697	8.447158033	8.278753603	9.230448922	9.176091259	9.568201724	9.146128036	8.748188028	9.531478917	9.491361694	9.653212514	8.230448924	8.301029998	8.579783598	8.778151251	8.612783858	7.612783867	9.785329835	10.25527251	10.04139269	10.04139269	9.934498451	9.716003344	9.716003344	9.662757832	9.643452677	9.531478917	9.934498451	9.819543936	4.0188569	-1.3232121	1.5932348
HBD	0	0	0	0	0	0	0	6.504331648	0	4.752209837	5.6662193	0	5.620719929	0	6.400298068	9.826074803	9.995635195	9.785329835	10.39794001	9.84509804	9.903089987	9.748188027	9.653212514	11.23044892	10.70757018	9.113943353	9.51851394	9.934498451	8.41497335	9.230448922	9.79934055	8.919078093	10.69019608	8.934498452	9.986771734	10.30103	9.77815125	10.32221929	10.20411998	11	10.32221929	10.53147892	10.17609126	10.53147892	10.63346846	9.934498451	-2.55363205	-0.10841453	-3.34066123
KLKB1	0	0	0	0	0	0	4.282282156	0	4.408901082	0	4.700539312	0	0	0	0	8.342422683	8.707570177	0	7.568201736	7.633468466	8.50514998	8.342422683	8.431363766	9.380211242	9.51851394	7.414973365	8.07918125	8.74036269	7.43136378	7.301030017	7.462398013	7.602060002	7.342422701	8.176091262	9.079181246	8.07918125	7.653212523	7.491361708	8.602059992	8.041392689	8.380211244	8.278753603	8.342422683	8.278753603	8.230448924	8.447158033	4.30504349	-2.04436868	-3.09613545
CLU	4.906884298	4.215531818	5.123538052	5.106160288	4.755188586	6.007142843	5.939504277	5.68678905	5.764170152	5.962388753	4.562780428	5.371470553	5.716780203	5.579533234	5.882820418	8.95424251	9.544068044	8.431363766	8.462397999	8.544068046	8.602059992	8.903089988	9.113943353	9.812913357	9.633468456	8.342422683	8.913813853	8.431363766	7.838849097	8.662757833	9.204119983	8.568201725	8.662757833	8.74036269	8.880813593	9.113943353	9.204119983	9.113943353	9.556302501	9.113943353	9.380211242	9.176091259	9.322219295	9.322219295	9.301029996	9.342422681	11.589546	10.091463	8.948721
APOC1	0	0	0	0	0	0	4.929730484	4.105544246	0	4.672384213	0	4.089587219	0	0	4.32962158	10.25527251	9.591064607	8.278753603	8.255272508	7.857332502	8.50514998	8.447158033	8.380211244	9.041392686	8.929418926	8.447158033	8.531478918	9.204119983	7.748188035	7.755874863	7.886490731	7.255272529	7.99122608	0	8.812913357	9.176091259	9.591064607	9.342422681	9.380211242	8.653212515	8.857332497	8.944482673	9.397940009	9.322219295	8.812913357	9.079181246	17.414308	17.515295	13.149478
APOL1	5.404594276	4.275794915	4.380952528	5.00765818	5.105159201	5.705616573	6.275325408	6.039585027	5.25712876	5.187974519	5.555141626	5.458535117	6.179563568	5.982900956	5.956491149	8.959041393	8.491361695	7.763428001	7.939519258	7.38021126	8.662757833	8.838849091	8.531478918	8.826074803	8.491361695	8.812913357	8.50514998	7.851258355	7.079181282	8.342422683	8.278753603	8.838849091	8.602059992	8.826074803	8.544068046	8.991226076	8.690196081	8.690196081	9	8.924279287	8.623249291	8.643452677	8.819543936	8.176091262	9.204119983	9.51851394	12.224235	5.775709	4.188198
KNG1	5.393438313	5.532449884	5.302443493	5.021267879	4.907712253	5.822164155	6.361273099	5.820433985	6.174827943	5.389848011	5.87232005	5.917794768	6.210630682	6.219741923	5.935282503	8.845098041	9.591064607	0	7.505149992	6.740362768	9.322219295	9.230448922	8.886490726	10	10.11394335	8.146128039	8.857332497	8.892094603	8.230448924	8.204119985	7.903089992	8.041392689	7.146128067	7.342422701	8.431363766	8.863322861	8.732393761	8.431363766	9.414973348	9.113943353	9.278753601	9.113943353	9.255272505	9.230448922	9.176091259	9.204119983	12.91727	6.542928	4.094936
IGHG2	5.401121262	4.533403425	4.963726455	4.365225832	4.940072999	5.670617814	5.455090129	5.950014161	4.809566448	5.633509863	0	4.284904251	5.815159854	0	4.924077603	10.83250891	10.8260748	9.707570176	9.462397998	9.707570176	10.77085201	10.75587486	10.88081359	10.88649073	10.51851394	9.662757832	10.17609126	10.14612804	10.23044892	9.968482949	10.07918125	10.20411998	9.72427587	9.973127854	10.49136169	10.44715803	10.50514998	10.38021124	10.85125835	10.462398	10.83884909	10.77815125	10.65321251	10.61278386	10.86923172	10.84509804	4.30649843	2.61406482	0
IGHA1	5.755768936	5.813034274	6.026232055	5.627311566	6.484719549	6.454933691	6.519605016	6.679589682	6.500021059	6.653783284	6.669814221	6.351766168	6.919108597	7.464697837	6.364325066	10.11394335	10.41497335	10.14612804	9.86923172	10.23044892	10.66275783	10.59106461	10.73239376	9.954242509	10.07918125	9.857332496	10.11394335	10.14612804	10.30103	9.991226076	10.14612804	10.17609126	10.23044892	9.973127854	10.07918125	10.462398	10.49136169	10.43136376	10.70757018	10.41497335	10.8920946	10.60205999	10.34242268	10.39794001	10.77815125	10.68124124	10.8595478	-2.0090223	-2.4805631
APOA1	4.887290894	4.54430374	6.24685493	5.880833592	6.441614709	6.402359582	8.16494431	6.198423385	6.313991166	7.119680703	7.676320413	6.820480803	7.222202321	7.670912642	7.446033724	10.30103	10.63346846	8.845098041	9.447158031	8.662757833	10.43136376	10.47712125	10.23044892	10.5797836	10.11394335	9.77815125	9.934498451	10.07918125	9.812913357	9.643452677	9.633468456	9.770852012	9.612783857	9.919078092	10.04139269	10.23044892	10.20411998	10.07918125	10.39794001	10.43136376	10.41497335	10.44715803	10.462398	10.23044892	10.34242268	10.64345268	12.8122059	4.3688325	4.3833985
APOE	6.372059877	6.138913124	6.743548881	7.430727105	7.536515263	7.170246104	8.309230963	7.171717797	7.570815654	8.220361409	7.811072958	7.483513482	7.867054747	7.911230623	7.917636555	9.991226076	9.204119983	7.845098046	0	7.755874863	8.176091262	8.491361695	8.431363766	8.875061264	8.255272508	7.792391697	7.53147893	8.832508913	7.43136378	8.623249291	7.301030017	0	7.462398013	7.397940026	8.50514998	9.176091259	9.146128036	8.851258349	9.278753601	8.579783598	8.838849091	9.041392686	9.414973348	9.531478917	8.531478918	8.819543936	16.462455	14.832159	8.028435
APOC3	6.146083984	7.312787522	7.028634806	7.472846487	7.223344184	6.902671614	7.952341317	8.534013815	6.573650195	7.787736302	8.498337896	7.280818827	8.044028431	7.021744964	8.271032569	10.47712125	9.591064607	7.707570185	7.361727855	0	9.204119983	8.838849091	9.230448922	9.079181246	9.041392686	8.897627092	9.278753601	9.86923172	8.41497335	8.973127854	8.79934055	8.301029998	8.176091262	8.255272508	9.204119983	9.903089987	10.04139269	9.301029996	10.25527251	9.176091259	9.278753601	9.431363764	10.11394335	10.14612804	9.146128036	9.176091259	21.85618	21.7061	18.58724
C1QC	0	0	0	0	0	0	0	0	0	0	0	0	5.593730105	4.193152437	0	9.86332286	10.07918125	0	8.255272508	6.770852085	9.612783857	9.591064607	9.74036269	9.361727836	8.892094603	9.113943353	9.361727836	9.322219295	8.176091262	7.968482953	8.690196081	8.518513941	8.462397999	8.204119985	9.72427587	10.17609126	10.04139269	9.968482949	10.14612804	9.785329835	9.832508913	9.748188027	9.72427587	9.633468456	10.14612804	10.07918125	9.9173721	8.4607045	0.7995989
APOH	0	0	0	0	0	4.803327354	5.254767948	4.724693575	4.211520997	0	0	0	4.415157049	4.814587172	4.944309907	8.857332497	9.531478917	0	8.041392689	7.301030017	9.301029996	9.176091259	9.278753601	9.255272505	9.361727836	7.322219315	8.826074803	9	8.146128039	8.113943356	8.301029998	8.255272508	8.113943356	8.146128039	0	8.755874856	7.908485024	8.176091262	9.322219295	9.322219295	9.414973348	9.204119983	9.041392686	9.278753601	9.447158031	9.361727836	9.15279303	5.65267702	-9.65059686
AMBP	3.921686475	0	0	4.968581004	0	4.972670217	4.694877096	5.137736957	4.819550516	5.397750615	4.547171442	5.103533485	5.100373992	0	4.625322742	8.977723606	9.602059991	0	7.886490731	6.875061321	9.204119983	9.041392686	8.633468457	9.949390007	9.301029996	7.929418931	8.662757833	8.770852012	7.949390012	7.949390012	8.176091262	8.07918125	7.342422701	8.146128039	8.431363766	8.707570177	8.880813593	8.602059992	9.041392686	8.924279287	9.146128036	8.863322861	9	8.919078093	9.113943353	9.041392686	7.5697938	0	0
C4BPA	3.986816505	0	0	4.670876421	0	4.178718019	0	5.10500236	4.554755591	3.724439723	0	5.440573791	4.976721286	5.416142697	4.296248243	10.20411998	10.49136169	8.380211244	9.698970004	9.176091259	10.04139269	10.14612804	10.2787536	9.886490725	9.544068044	9.968482949	9.892094603	10	9.204119983	9.146128036	9	9.698970004	9.079181246	9.819543936	9.991226076	10.36172784	10.14612804	10.04139269	10.39794001	9.986771734	9.977723605	9.826074803	10.04139269	9.84509804	10.04139269	10.17609126	9.233402	2.044248	1.433453
APOB	7.89865372	7.316216061	6.577342069	7.875041065	7.558994487	7.813339618	8.649825202	7.684738058	8.214557665	8.452632329	7.648200122	8.568967019	7.781368199	8.565978822	7.443591753	10.25527251	9.146128036	0	7.361727855	0	8.755874856	8.612783858	8.602059992	9	8.462397999	8.278753603	8.361727838	8.819543936	8.146128039	7.681241246	7.963787832	7.897627097	7.255272529	7.146128067	8.623249291	8.732393761	8.949390007	8.579783598	9.113943353	8.672097859	8.72427587	8.973127854	9.113943353	9	8.491361695	8.623249291	14.021238	3.8486085	2.1210907
HRG	0	0	3.99895644	0	4.357572784	4.610915555	0	4.315361487	5.008204017	4.267969159	4.319959229	4.662011337	4.604776674	5.048484532	5.096982968	8.973127854	9.322219295	7.949390012	7.806179981	0	9.204119983	9.113943353	9.079181246	10.30103	10.41497335	7.995635199	8.556302502	8.477121256	7.919078098	7.43136378	7.732393768	7.944482677	7.38021126	7.880813598	8.255272508	8.662757833	8.255272508	8.301029998	8.897627092	8.698970005	9.041392686	8.681241238	9.041392686	8.892094603	9.079181246	8.968482949	-4.16961673	0	-7.07911932
APOD	5.364083619	4.395151592	5.739258178	5.328654773	6.509694757	6.322904732	5.842522497	5.954657786	6.201340034	6.54638977	6.753601135	6.474992491	6.670053812	5.475822221	6.717476691	8.968482949	8.982271233	0	6.748188105	0	8.579783598	8.778151251	8.255272508	8.602059992	8.544068046	7.176091288	7.230448947	8.41497335	8.041392689	8.278753603	7.982271238	7.623249301	7.672097867	7.875061269	8.07918125	8.322219297	8.255272508	8.07918125	8.662757833	8.602059992	8.653212515	8.681241238	8.672097859	8.662757833	8.477121256	8.690196081	8.620264	-1.78602	-2.617557
APOA4	4.497081763	0	0	0	0	0	6.163683348	4.613323741	4.862196996	0	0	4.316829691	0	4.262712063	5.092966138	8.672097859	9.079181246	0	0	0	8.716003344	8.79934055	8.568201725	9.041392686	8.568201725	7.732393768	8.230448924	8.491361695	6.799340618	7.838849097	7.633468466	0	0	0	8.431363766	8.875061264	8.770852012	8.643452677	8.79934055	8.322219297	9.113943353	8.72427587	8.919078093	9	8.633468457	8.50514998	2.82664024	-2.22556079	-11.73922921
C1S	3.856789289	4.711984284	4.545071965	0	4.814653724	5.371808303	4.733365813	5.233658476	5.326882482	5.320289642	4.39795738	5.444982671	5.679428805	5.338856737	5.994320233	8.50514998	9.079181246	6.892094658	7.322219315	6.707570261	8.770852012	8.602059992	8.785329836	8.995635195	8.176091262	7.176091288	7.880813598	8.230448924	7.633468466	7.230448947	7.176091288	7.491361708	6.982271278	6.913813905	7.857332502	7.826074809	7.963787832	7.740362697	8.41497335	8.041392689	8.146128039	7.99122608	8.278753603	8.255272508	8.361727838	8.447158033	0.3989308	-0.3450093	0
ITIH2	5.193592048	4.697046168	4.317394675	5.638171657	4.75466171	6.053591223	6.061945681	5.717616421	5.978995823	6.536531298	6.026888971	5.91624491	5.493584905	5.966334657	5.671586568	9.113943353	9.707570176	0	7.672097867	7.113943386	9.322219295	9.176091259	9.255272505	10.32221929	9.79239169	8.278753603	8.785329836	8.924279287	8.07918125	7.986771739	8.39794001	8.146128039	7.633468466	8.431363766	8.531478918	8.897627092	8.908485019	8.602059992	9.079181246	9.113943353	9.322219295	9.146128036	9.113943353	9.204119983	9.176091259	9.079181246	5.892044	6.366916	5.211323
ITIH1	5.233676226	4.735622849	4.674245531	5.716963575	4.562780428	5.990392583	5.754052334	5.832091023	6.045995419	6.360714938	5.641078306	5.707186806	5.932002177	5.51413717	5.909754946	8.939519253	9.397940009	0	7.591064618	6.740362768	9.176091259	8.778151251	9	9.963787827	9.51851394	8.000000004	8.591064608	8.579783598	7.934498456	7.908485024	8.07918125	7.812913363	7.342422701	8.041392689	8.50514998	8.72427587	8.755874856	8.50514998	8.875061264	8.982271233	9.041392686	8.95424251	8.963787828	8.977723606	8.845098041	8.991226076	8.417195	4.547327	2.38035
PON1	4.865109899	3.929265618	0	0	4.389325592	5.43284267	6.137281617	0	5.526655835	4.7704175	0	5.209249531	5.192681726	5.20531536	5.576745505	8.785329836	8.832508913	0	7.146128067	0	8.763427994	8.278753603	8.230448924	9.146128036	8.477121256	7.698970013	7.886490731	8.39794001	7.255272529	7.278753624	7.832508919	7.602060002	6.968482995	7.662757841	8.07918125	8.380211244	8.672097859	7.968482953	8.806179975	8.41497335	8.602059992	8.518513941	8.50514998	8.518513941	8.716003344	8.79239169	7.120852	0	8.243366
PRDX2	0	0	4.616947887	3.734239604	3.937417581	0	5.055229208	4.796414739	0	5.42952781	5.122251931	4.996778646	5.009964776	0	4.359095224	0	0	7.414973365	8.518513941	7.838849097	8.301029998	7.986771739	7.623249301	8.462397999	8.623249291	8.579783598	7.20412001	7.698970013	0	7.707570185	7.724275878	0	8.544068046	6.944482722	7.146128067	7.832508919	8.531478918	8.113943356	9.414973348	9.079181246	8.113943356	8.07918125	7.949390012	8.531478918	8.477121256	7.361727855	6.477355	6.037832	5.509534
HBB	5.256152266	5.302133871	5.436428233	5.05447133	5.082325708	5.655235468	7.312232423	7.253993218	4.895383867	5.823246589	7.124035214	4.958850452	6.662068551	5.823963676	7.106762654	9.770852012	10.11394335	10.11394335	10.49136169	10.14612804	9.986771734	9.681241237	10.04139269	11.25527251	11.04139269	9.278753601	9.643452677	10.07918125	8.982271233	9.176091259	10.04139269	9.146128036	10.78532984	9.230448922	10.11394335	10.70757018	9.892094603	10.44715803	10.38021124	11.17609126	10.54406804	10.67209786	10.41497335	10.68124124	10.73239376	10.07918125	11.569349	8.386381	6.867475
ECM1	0	0	0	0	0	0	4.116972823	4.617430227	0	4.691885651	4.528415302	0	0	4.382755256	4.676153835	8.301029998	8.778151251	0	7.602060002	7.079181282	8.579783598	8.255272508	8.653212515	7.146128067	7.785329842	8.477121256	8.278753603	7.973127858	0	0	6.785329906	7.361727855	7.414973365	8.322219297	7.929418931	8.897627092	8.544068046	8.041392689	8.41497335	8.431363766	7.939519258	8.477121256	8.301029998	8.342422683	8.892094603	8.431363766	0	0	0
IGHM	0	5.479995438	5.483233442	0	0	6.066514886	5.239704798	5.247686095	5.921074912	6.259615617	5.495753803	5.358111957	6.457479345	5.979796407	5.935743998	10.77815125	10.74818803	10.69019608	10.8573325	10.32221929	10.98227123	11	11.07918125	10.62324929	10.76342799	10.80617997	10.2787536	10.60205999	10.17609126	10.62324929	10.67209786	10.74036269	10.68124124	10.69897	10.81291336	11.11394335	11	11.11394335	11.14612804	11.32221929	10.96378783	11.11394335	11.07918125	10.36172784	11.34242268	11.49136169	14.189994	4.370648	3.678309
IGHG3	0	3.845346137	4.827743949	4.906663602	4.388118971	5.18030082	4.481886729	4.938324549	4.323891208	0	5.069301715	5.181274633	5.098356408	0	4.009535877	10.93449845	10.97312785	10	10	9.77815125	10.86332286	10.74036269	11	10.97772361	10.70757018	10.04139269	10.49136169	10.69897	10.20411998	10.07918125	10.07918125	10.20411998	10	9.982271233	10.5797836	10.73239376	10.69897	10.462398	10.81291336	10.73239376	10.86332286	10.83250891	10.69897	10.56820172	10.90308999	10.93449845	16.390975	15.764201	15.446029
APOA2	0	4.109240969	3.700270937	5.04267	3.907034952	4.884744401	5.478596794	6.047592195	0	5.541293364	6.04304027	4.421653276	5.674917146	5.13335046	6.770944087	9.707570176	9.505149978	8.146128039	8.531478918	7.778151258	9.806179974	9.653212514	9.505149978	9.79239169	9.301029996	8.913813853	9.041392686	9.579783597	9.431363764	9.079181246	9.361727836	8.95424251	9.204119983	9.230448922	9.431363764	9.447158031	9.623249291	9.361727836	10.07918125	9.908485019	9.982271233	9.977723605	10.04139269	9.929418926	9.838849091	10.25527251	15.973452	12.948884	12.062621
C1R	0	0	0	0	0	0	4.121264305	0	0	4.790010564	0	3.787956123	4.319022733	0	4.689495326	9.322219295	9.414973348	0	7.505149992	7.662757841	8.875061264	9.079181246	9.361727836	8.778151251	8.755874856	8.230448924	8.939519253	8.491361695	7.579783608	7.079181282	7.361727855	7.919078098	7.556302513	7.672097867	8.380211244	8.838849091	8.633468457	8.380211244	8.892094603	8.477121256	9.041392686	8.39794001	8.995635195	8.880813593	9.204119983	9.301029996	9.524048	7.86186	2.303241
A1BG	4.028123715	5.107813491	5.206169893	5.283710449	5.285284946	5.496629411	5.515859279	5.790118312	6.00623664	6.008881946	6.106623616	6.153813341	6.188869731	6.59088094	6.694223291	8.929418926	9.380211242	7.755874863	8.113943356	7.301030017	8.919078093	8.806179975	8.863322861	8.949390007	8.176091262	7.653212523	8.602059992	8.973127854	8.50514998	8.278753603	8.50514998	8.301029998	7.986771739	7.949390012	8.763427994	8.462397999	8.662757833	8.39794001	9.176091259	9.041392686	9	9.041392686	9.079181246	9.041392686	8.968482949	9.041392686	0	0	8.6429448
TLN1	0	0	0	0	0	6.150619224	0	0	0	6.368033302	0	3.902601131	0	5.296796775	0	7.113943386	0	0	0	6.579783711	7.740362697	0	7.623249301	8.204119985	7.591064618	7.612783867	0	6.838849154	0	7.544068057	9.113943353	6.897627146	6.954242558	0	7.361727855	0	0	7.785329842	7.447158047	8.278753603	8.623249291	6.255272746	8.041392689	6.875061321	9.176091259	8.662757833	10.1265237	7.8339618	3.9578865
FBLN1	0	0	0	0	0	0	0	0	0	3.57989787	4.316410711	0	0	4.668674729	0	7.806179981	8.380211244	0	0	0	8.544068046	8.447158033	7.959041397	0	7.763428001	7.079181282	7.633468466	7.447158047	0	0	0	0	0	6.322219502	6.9731279	7.857332502	7.397940026	7.322219315	8.07918125	7.812913363	7.707570185	7.963787832	7.716003352	7.602060002	8.698970005	7.230448947	7.297074	8.639849	7.850111
APOM	4.718792229	0	5.409207567	5.256522919	5.66407759	5.163027129	5.221129832	5.637550767	5.540986052	5.215455137	5.504336272	6.590346202	6.333616727	5.817235392	6.151501927	8.913813853	8.698970005	0	7.414973365	0	7.97772361	8.113943356	8.278753603	8.602059992	8.204119985	0	7.869231726	7.748188035	8.041392689	7.934498456	7.954242514	7.672097867	7.491361708	7.477121269	7.568201736	7.832508919	7.919078098	7.568201736	0	0	7.995635199	7.903089992	8.146128039	7.832508919	0	8.41497335	12.86024	7.85141	4.775078
MYH9	3.856124444	0	0	0	4.537579853	5.864612523	0	4.281737672	0	5.272215357	0	4.547294625	0	0	0	7.113943386	0	0	0	0	7.924279291	0	7.505149992	9.113943353	8.845098041	0	0	0	0	0	8.255272508	0	0	0	0	0	0	0	0	8.146128039	8.041392689	0	7.20412001	5.748188803	8.991226076	7.913813858	8.2497912	5.5231649	5.596246
ITIH3	4.308799104	0	4.45496675	0	0	0	4.850872818	0	4.907739108	5.41154395	4.817360403	0	4.594845395	0	0	7.414973365	8.74036269	0	0	0	7.857332502	7.851258355	7.255272529	9.204119983	8.963787828	0	7.740362697	8.041392689	7.38021126	7.176091288	6.755874932	0	0	7.505149992	7.342422701	7.53147893	7.414973365	0	7.623249301	7.770852019	8.07918125	7.799340556	7.755874863	7.826074809	7.806179981	7.602060002	13.57174	11.11201	0
LDHB	0	0	0	0	0	0	0	4.560874632	0	4.740212635	0	0	4.261762318	0	0	0	0	0	6.939519303	0	0	0	0	7.643452686	0	0	0	0	0	0	7.903089992	0	6.892094658	0	6.505150114	0	0	0	0	7.544068057	7.740362697	7.322219315	0	0	8.322219297	7.778151258	3.42474704	0.6054191	-0.84250172
ACLY	0	0	3.89580915	0	4.815451559	0	4.851692426	0	0	0	0	0	4.886157827	4.959237019	0	0	0	0	0	0	0	0	0	7.447158047	6.799340618	0	0	0	0	0	0	0	0	0	0	0	0	0	0	7.53147893	0	0	0	0	8.518513941	0	9.5719984	6.6589789	6.718182
APOC4	0	6.056856467	0	4.131650738	0	0	7.227381679	7.488908115	0	6.804142296	7.48921986	6.273937643	7.377646248	0	7.492485328	9.568201724	7.973127858	0	0	0	0	0	0	0	0	0	6.785329906	7.643452686	0	0	0	0	0	0	0	8.612783858	8.301029998	7.477121269	8.633468457	0	0	0	8.447158033	8.41497335	0	0	13.477915	13.474442	9.557367
APOF	4.653800825	4.279233346	5.038981592	0	5.333408982	5.282230006	6.469527627	4.739105365	5.886581523	5.423673403	5.613028476	5.42037003	6.510165641	6.683740365	4.62253522	6.477121399	6.612783963	0	6.568201841	0	7.778151258	0	0	7.397940026	6.806180042	0	7.38021126	7.681241246	6.949390055	7.986771739	6.724275952	0	0	0	0	6.968482995	7.707570185	6.908485072	8.113943356	7.869231726	8.113943356	7.908485024	8.176091262	8.07918125	0	8.000000004	13.20639	0	12.39904
CNDP1	0	0	0	0	0	0	4.005223425	0	0	0	0	0	0	5.000351636	0	0	7.579783608	0	0	0	7.079181282	0	0	7.851258355	0	0	0	0	0	0	0	0	0	0	6.477121399	0	0	0	0	0	0	0	0	0	0	0	13.01552	0	0
MMRN1	0	0	0	4.145848757	0	0	4.644960217	0	0	4.709448053	0	0	0	0	0	7.176091288	0	0	0	0	7.792391697	0	7.579783608	0	0	6.982271278	0	0	0	0	0	0	0	0	7.414973365	8.041392689	0	7.986771739	0	7.414973365	0	7.38021126	0	0	8.278753603	0	14.533719	11.262871	0
CAMP	4.021644036	0	0	0	0	0	0	5.456701495	0	0	4.789940125	0	5.364027275	0	5.909888041	8.113943356	0	0	0	6.591064718	0	0	0	8.278753603	8.146128039	0	0	0	0	7.748188035	0	7.041392725	7.568201736	7.041392725	0	7.113943386	0	0	0	0	0	0	0	0	0	0	11.72305	12.54351	7.386544
APMAP	0	0	0	0	0	0	0	0	4.193263773	0	0	0	0	0	0	0	0	0	0	0	0	0	0	7.949390012	7.785329842	0	0	0	0	0	0	0	0	0	0	0	0	0	0	0	0	0	0	0	0	0	9.1049106	2.7933811	0
[truncated: 109 more columns]
