# Supplementary material for: A novel machine learning algorithm selects proteome signature to specifically identify cancer exosomes
Source: eLife. 2024 Mar 26;12:RP90390. doi: 10.7554/eLife.90390 (PMC10965221; doi:10.7554/eLife.90390)
Supplement: Figure 6—source data 1. [file elife-90390-fig6-data1.csv]

gene	LFQ.intensity.A1EV	LFQ.intensity.B1EV	LFQ.intensity.C1EV	LFQ.intensity.D1EV	LFQ.intensity.E1EV	LFQ.intensity.F1EV	LFQ.intensity.G1EV	LFQ.intensity.H1EV	LFQ.intensity.HCEV1	LFQ.intensity.HCEV10	LFQ.intensity.HCEV11	LFQ.intensity.HCEV12	LFQ.intensity.HCEV2	LFQ.intensity.HCEV3	LFQ.intensity.HCEV4	LFQ.intensity.HCEV5	LFQ.intensity.HCEV6	LFQ.intensity.HCEV7	LFQ.intensity.HCEV8	LFQ.intensity.HCEV9	LFQ.intensity.I1EV	LFQ.intensity.J1EV	LFQ.intensity.K1EV	LFQ.intensity.L1EV	LFQ.intensity.UrA	LFQ.intensity.UrB	LFQ.intensity.UrC	LFQ.intensity.UrD	LFQ.intensity.UrE	LFQ.intensity.A1EV.1	LFQ.intensity.B1EV.1	LFQ.intensity.C1EV.1	LFQ.intensity.D1EV.1	LFQ.intensity.E1EV.1	LFQ.intensity.F1EV.1	LFQ.intensity.G1EV.1	LFQ.intensity.H1EV.1	LFQ.intensity.I1EV.1	LFQ.intensity.J1EV.1	LFQ.intensity.K1EV.1	LFQ.intensity.L1EV.1	LFQ.intensity.RCEV1	LFQ.intensity.RCEV2	LFQ.intensity.RCEV3	LFQ.intensity.RCEV4	LFQ.intensity.RCEV5	LFQ.intensity.RCEV6	LFQ.intensity.UCEV1	LFQ.intensity.UCEV2
group	Cancer	Cancer	Cancer	Cancer	Cancer	Cancer	Cancer	Cancer	Control	Control	Control	Control	Control	Control	Control	Control	Control	Control	Control	Control	Cancer	Cancer	Cancer	Cancer	Cancer	Cancer	Cancer	Cancer	Cancer	Cancer	Cancer	Cancer	Cancer	Cancer	Cancer	Cancer	Cancer	Cancer	Cancer	Cancer	Cancer	Cancer	Cancer	Cancer	Cancer	Cancer	Cancer	Cancer	Cancer
ALDOC	8.933386042	8.477613178	9.033061693	8.986009932	8.968286772	9.000520841	8.303260875	9.250493192	9.021189299	8.847825513	8.845476332	8.709566741	8.826541257	9.114577627	9.036549055	8.90706185	8.958128894	8.601114373	9.035109403	9.175743685	8.418798292	8.594149367	9.029383778	8.743776218	9.025551623	8.854597499	8.966868861	8.561733277	7.10181582	8.801383128	8.387887913	8.973764968	8.98516591	8.895411496	8.90295968	8.161308098	9.277173556	8.314436071	8.551474397	8.979061	8.708616332	8.211601047	8.34482439	8.228451693	8.447778011	8.569209995	8.14903427	8.294576441	8.437195454
EFHD2	8.722296556	8.429719991	8.804364362	8.838395678	8.583425502	8.696207813	8.561101385	8.917305909	8.752701321	8.604485257	8.652468752	8.629949584	8.596641074	8.807785251	8.888218821	8.805432889	8.861331255	8.600275725	8.691461666	8.868991031	8.899086943	8.968847043	8.743705703	8.630132822	8.699291264	8.58146039	8.585979318	8.444185374	9.097118425	8.51265772	8.107481322	8.415173747	8.612656729	8.229707436	8.481055462	8.221231616	8.679509661	8.657600771	8.874093157	8.488917175	8.316033284	8.021685356	8.439411651	7.393487476	7.961302423	8.220108091	7.861827034	8.142764778	8.064645149
OLFM4	7.874122179	8.355662201	8.32352023	8.811963553	7.983558639	7.789615969	7.868415189	8.77381569	7.82517937	8.309118934	7.692890972	7.774276037	7.937979027	8.45121826	7.227501091	8.177767296	8.292300387	8.888959737	6.564666183	0	8.631900148	9.038540687	7.948119429	8.661708595	9.02905895	8.15881465	7.694833262	7.889850534	8.977101433	7.804289405	8.29832899	8.250566371	8.858115933	7.938434664	7.769820265	7.821251438	8.817981617	8.623280311	9.012457579	7.991500751	8.607358504	0	7.822658353	0	6.662115451	8.699681665	0	7.680036219	0
PLD3	8.465293605	8.519591759	7.88166421	8.095064693	8.623487054	7.882769228	8.605725129	8.256188385	8.224325839	8.568717877	8.251005176	8.434728543	8.336899811	8.003718968	7.5124576	8.188450359	7.590496323	8.81056853	8.08037392	7.820227746	8.585280207	8.700452758	8.551620756	9.012626351	8.32522823	8.464593862	8.007064661	9.059336178	8.250517588	8.368398468	8.392186755	7.795261148	8.0051376	8.565777005	7.841841064	8.457942423	8.225231725	8.506274973	8.563884342	8.446785621	8.941233077	8.515052146	8.702111593	9.060697841	8.518579738	8.487194959	8.480366311	8.061452483	8.024649835
ALDOB	9.565009104	9.856118396	8.798954339	8.952167423	10.13987909	9.439127343	9.317039031	9.743447046	9.612985069	9.859972446	9.792615784	9.896189895	10.00432137	9.348810921	9.38030171	10.00860017	9.532754379	10.38021124	9.614812879	9.119552798	10.07918125	9.752877811	9.411266067	9.452537744	9.156609718	9.653222165	9.725315293	10.24303805	9.248365672	9.560181711	9.819030375	8.812779708	8.994361152	10.1271048	9.47201005	9.290635526	9.763450457	10.04532298	9.747986344	9.412695692	9.420549814	10.09342169	9.756042446	9.370919992	9.98435176	9.853533952	10.5132176	9.868908813	9.081923105
MYH9	10.06069784	9.718559812	10.0211893	10.08278537	9.954314886	9.994497521	9.648574665	10.18184359	10.0211893	9.939449361	9.887105071	9.770881454	9.909481144	10.04139269	10.2121876	9.976725869	10.04139269	9.8714153	10.05307844	10.04139269	9.833937179	9.950160318	10.06069784	9.922497095	10.1903317	9.995999148	10.05690485	9.790876022	9.818021239	10.01283722	9.632538272	10.00432137	10.06069784	9.900853048	9.974990396	9.559523607	10.161368	9.754348336	9.862000117	10.0211893	9.846516485	9.238397413	9.524707612	9.612084185	9.519105756	9.807886651	9.453195986	9.4606423	9.442605179
LASP1	9.008259415	8.892155846	8.164590763	8.567849452	8.776236139	8.526830168	9.058008233	8.330291993	8.602450682	8.914343158	8.817274421	8.770395395	8.864789842	8.85324787	8.081311299	8.818918365	8.599304356	9.092158997	8.857561648	8.452752166	9.081851172	9.23651207	8.716353979	8.848176797	8.820418225	8.613461252	8.656596445	8.866245976	9.218929185	9.013047997	8.896007842	8.075948228	8.608889577	8.75852585	8.534825388	9.030802049	8.24129739	9.065019215	9.209380953	8.757373251	8.833357513	9.092966138	9.126650821	8.831101565	9.106156887	9.102056193	8.951590056	9.074779883	8.977261637
RAB5C	9.70111878	9.862793055	9.942955023	9.847572659	9.810232518	9.846615417	9.851942893	9.90561781	9.754547087	9.753583059	9.742371583	9.825516992	9.730895274	9.709956486	9.89852773	9.778042663	9.896096119	9.780014713	9.705307665	9.879617637	9.811273308	9.791915105	9.818707443	9.82087767	9.782644588	9.884693432	9.78428913	9.930821728	9.793308344	9.699499521	9.819931995	9.974636022	9.860685303	9.808690256	9.888325545	9.829406705	9.929398488	9.788302741	9.776396054	9.83605814	9.799375016	9.874458624	9.835893406	9.92170728	9.835677891	9.750562389	9.857193741	9.82085799	9.848189117
VAT1	9.825244312	9.335898992	10.02530587	9.889396957	9.867278879	9.87391321	9.461408477	10.1271048	9.92973559	9.90181237	9.877186991	9.765899422	9.818885415	9.988300265	10.20682588	9.90804514	9.809559715	9.776374251	9.923124805	10.1172713	9.68145833	9.587710965	9.936599186	9.700366186	9.877261895	9.711241857	9.845234511	9.598659214	9.334514066	9.795198509	9.267359491	9.974170755	9.858091848	9.82023431	9.822311948	9.36361198	10.04921802	9.603111881	9.515992994	9.89649866	9.637809829	9.628521753	9.359835483	9.320914453	9.475060714	9.202324813	9.580160584	9.344352969	9.435031692
VPS4B	10.1430148	10.64836001	9.863994604	9.971725686	10.161368	10.18752072	10.38021124	9.9966036	10.05690485	10.31597035	10.39093511	10.60852603	10.29666519	9.802937837	9.858242355	9.986202749	9.965507435	10.34242268	9.905256049	9.917237603	10.3283796	10.34439227	10.07188201	10.24303805	9.764669199	10.36548798	10.11058971	10.6294096	10.56584782	10.17318627	10.63848926	9.879015553	9.981392708	10.15228834	10.20682588	10.37106786	10.01703334	10.31597035	10.34439227	10.08990511	10.26245109	10.51188336	10.36921586	10.71432976	10.73158877	10.41664051	10.52113808	10.38916608	10.41161971
DAG1	8.633650216	8.508327676	7.158694148	7.814766847	8.787056457	7.636377564	8.236335688	8.263067685	7.988255652	8.662521739	8.572418493	8.536684674	8.485267026	7.739920281	8.13075178	8.438747978	7.339530959	9.134846209	7.963542292	7.52664939	8.701870074	8.678645827	8.949194775	9.215426048	8.318710121	8.822096128	7.84396741	9.262664625	7.774305248	8.558480567	8.398721038	7.24949189	7.885044437	8.685992394	7.589636897	8.1103203	8.212746767	8.53350515	8.58568628	8.82216808	9.139595759	8.744777871	8.795963395	9.230448922	8.7296102	8.764796111	8.703781296	8.047819832	8.388136742
APOA1	8.658907696	9.535471347	8.155457504	9.036469199	8.446070937	8.980766695	9.213862931	8.978417922	8.283165493	7.935265369	7.137385796	9.640590742	8.480452515	8.792454728	8.084862143	8.258709103	8.368082246	8.291057897	7.285602334	6.853929348	10.02938378	10.89872518	9.451648299	8.062431557	10.69019608	8.825081922	8.304555152	8.416024406	9.862131379	8.70139527	9.494210269	8.202133983	8.975486954	8.483858202	8.869354949	9.225309282	8.954753711	10.0211893	10.81358099	9.39849555	8.245931957	8.270865091	9.401555618	9.452997088	8.824464283	9.167317335	8.511722978	8.921722882	9.292787535
APLP2	8.393469909	8.631037698	7.648213605	7.537756162	8.045714063	7.731185716	7.984432798	7.98158306	7.927493555	7.876183194	7.863102688	7.836773378	7.964575456	7.418450467	7.09843608	7.803887107	7.648701466	8.07928981	7.258541531	7.772864243	7.823767579	7.822736744	8.142889809	8.67280878	7.429429281	8.386231352	7.557759777	9.020568435	7.363705992	8.137828667	8.377979761	7.462158336	7.284363069	7.912445265	7.617974847	7.873442681	7.719737221	7.684432415	7.606402875	7.889671401	8.436544278	7.684863316	8.1927904	8.665609131	7.892261612	7.902046433	0	7.180326654	0
CAB39	9.705598609	9.884387491	9.521098839	9.576525627	9.720985744	9.579131666	10.07188201	9.50917563	9.596674052	9.63496067	9.750809134	9.77768051	9.72611567	9.57213942	9.461723569	9.645078235	9.603966695	9.794501989	9.56937391	9.449709756	10	10.13987909	9.639177592	9.80068959	9.497468724	9.792972695	9.614338177	9.935950403	10.07554696	9.655196081	9.827866617	9.517670854	9.586587305	9.699291263	9.583640781	10.0374265	9.50703236	9.957698254	10.08990511	9.634628391	9.756727369	9.718127852	9.740102035	9.698804941	10.0211893	10.01283722	9.635523958	10.07918125	9.884687768
GPC1	0	7.381548274	7.636528024	6.61006377	6.721720038	6.829207317	7.381367837	7.167760296	0	6.499577258	0	0	0	0	0	7.0212307	0	0	0	8.021974459	0	0	0	0	6.882387967	0	0	7.132675881	0	0	7.339570702	0	0	7.113976792	0	7.369772307	0	0	0	0	0	0	0	0	0	7.395483672	0	0	0
FOLR1	9.482873584	9.74828108	8.601157895	9.01703334	9.466867621	9.069631103	9.778635942	8.800717079	9.46423611	9.474886135	9.369215858	9.867638344	9.742064942	8.793441134	8.993674256	9.045596772	8.977458377	10.33243846	9.085789891	9.035589818	9.689264451	9.773786445	9.328970494	9.418665813	8.905558438	9.364626029	9.25362873	9.857181674	9.628358273	9.466630398	9.705957742	8.63768982	9.028693229	9.50015411	9.07947068	9.758063661	8.870321956	9.655685762	9.773076664	9.324981703	9.414020196	9.944783613	9.851148232	10.40483372	9.572534719	9.593773267	9.622680199	9.490857059	9.702430537
RAB6A	10.06069784	9.871713008	10.34830486	10.20139712	9.985480365	10.23552845	9.941933596	10.28330123	10.30103	10.10037055	10.03342376	10.07918125	10.09691001	10.13353891	10.23299611	10.03342376	10.12385164	9.934720592	10.20682588	10.24551267	9.710633471	9.716454108	10.16435286	10.03342376	10.16435286	10.07918125	10.06069784	9.926517364	9.736731059	10.08278537	9.841359471	10.33645973	10.08635983	9.984108569	10.20951501	9.88702058	10.24797327	9.683398296	9.637719825	10.1430148	9.990423219	9.831364189	9.720861878	9.753230578	9.653048416	9.659640521	9.827084821	9.714447121	9.907776702
ANXA2	10.47275645	10.1430148	10.1931246	10.30319606	10.23552845	10.09342169	10.06069784	10.65030752	10.36548798	10.27415785	10.36361198	10.40483372	10.30319606	10.48000694	10.2787536	10.28330123	10.38738983	10.53529412	10.35218252	10.44090908	10.5575072	10.73319727	10.38381537	10.47712125	10.3783979	10.17897695	10.38738983	10.28103337	10.50920252	10.45939249	10.12057393	10.22271647	10.31806333	10.21484385	10.11394335	10.0211893	10.66086548	10.51054501	10.70926996	10.38201704	10.45178644	10.30963017	10.46089784	10.17318627	10.30319606	10.17318627	10.02938378	10.48287358	10.25767857
ACTN1	9.037426498	8.742261533	9.426413656	9.260071388	9.096249384	9.310098272	8.998555744	9.376923525	9.195927314	9.171287551	9.120541029	9.047975406	9.288271588	9.313635254	9.487067638	9.081167215	9.197969368	9.055225384	9.262427357	9.142107772	9.298022978	9.409814817	9.230806429	9.231749855	9.385499027	9.089975723	9.278890725	8.960427965	8.997364538	8.965394574	8.602363892	9.396791955	9.237317484	9.010130278	9.275794915	8.947879552	9.324940602	9.298940363	9.313213178	9.178026789	9.155912689	8.627458033	8.601527656	8.051654088	8.736882322	8.609914411	7.668646797	8.639735441	8.653029107
VPS4A	9.974253711	10.42160393	9.584455614	9.695350318	9.951429809	9.948740519	10.11394335	9.726148307	9.76179257	10.04921802	10.12385164	10.30103	10.03342376	9.521046506	9.590696972	9.622928621	9.665318271	10.11058971	9.581915541	9.635292696	10.06445799	10.02938378	9.854451795	9.976349979	9.47420169	10.12057393	9.852522689	10.42324587	10.29446623	9.96833816	10.40483372	9.682794678	9.745137276	9.963849191	9.99924802	10.12385164	9.782028069	10.05690485	10	9.877175466	9.974511693	10.23299611	10.05690485	10.40312052	10.45939249	10.13033377	10.32428246	10.10037055	10.04139269
RAB8A	9.331852272	9.30455515	9.306682311	9.1726613	9.191339213	9.211040406	9.16678522	9.383958911	9.266325792	9.328970494	9.352799743	9.365487985	9.333064201	9.302590649	9.32446766	9.32541303	9.330068636	9.460416697	9.256453145	9.337179626	9.234694407	9.53140227	9.174408732	9.385373873	9.183212884	9.205014793	9.077186154	9.283301229	9.56951436	9.278136007	9.2511757	9.250102705	9.167966814	9.139028548	9.17995373	9.133570841	9.350248019	9.162235724	9.450818554	9.146128036	9.341355375	9.500387436	9.419410474	9.303757469	9.300095258	9.309353323	9.512697734	9.445650899	9.458139068
RAB14	9.27567983	9.338994049	9.765526995	9.603988315	9.459618624	9.585268921	9.281828467	9.771859289	9.619875609	9.493207022	9.487378798	9.505868684	9.386338417	9.561387637	9.611532134	9.456305289	9.571580737	9.368881656	9.58334616	9.74840512	9.269139197	9.27074869	9.601049081	9.400865961	9.552351808	9.574748708	9.509215968	9.4868412	9.127720153	9.247580506	9.239574737	9.707093042	9.551157117	9.381403913	9.531976793	9.194985844	9.683056048	9.171199717	9.220108088	9.527268913	9.324652786	9.169292275	9.135418905	9.131394082	9.079687628	9.106088859	9.206825876	9.059033005	9.056676216
STOM	10.04921802	10.34439227	9.634053854	9.992840596	9.803156556	9.701300246	10.49831055	10.04532298	9.648594174	9.999269772	10.02938378	10.13353891	10.03342376	9.652459084	9.553482515	9.952869902	9.858537198	10.33243846	9.439000924	9.471056894	10.53529412	10.74896286	9.971169118	10.05690485	9.845631274	10.20139712	9.800277064	10.28103337	10.72916479	10.01703334	10.29446623	9.63038719	9.954092893	9.767155866	9.642355686	10.44247977	9.978687127	10.46982202	10.69284692	9.943988875	10.01283722	10.29225607	10.2380461	10.35218252	10.2278867	10.47567119	10.23299611	10.57863921	10.42813479
LCN1	7.861056251	6.859798607	0	0	0	0	0	0	6.829381038	7.424097256	6.72468547	6.968324192	7.761371473	0	0	6.499040795	0	0	0	0	7.899858794	7.983761565	0	6.790897179	0	0	0	0	0	7.860074361	0	0	0	0	0	0	0	7.852925045	8.280532847	0	7.177392221	7.757342885	7.411080729	0	0	0	7.573115401	0	8.11594318
EVPL	9.489269246	9.612953305	8.578673587	9.003805074	9.249834042	8.772329043	10.04532298	9.004321374	9.125188384	9.147428969	9.214843848	9.332721164	9.263825366	9.048752458	8.769628377	8.950418408	9.05751396	9.654571176	8.805901666	8.094541005	10.06445799	10.36172784	9.184521086	9.627212188	8.733895108	9.351429088	9.145351817	9.620594062	10.67302091	9.439837761	9.590262092	8.478436622	9.015862509	9.232996111	8.661841071	10.00432137	8.972063916	10.03342376	10.33645973	9.178976948	9.592276711	9.654705847	10.38021124	9.588831726	9.653222165	9.627109711	9.542825427	9.986919459	10.08990511
CPNE3	9.624137651	9.793028654	9.698631123	9.871041417	9.812345061	9.732047795	9.620895666	9.777637031	9.731588765	10.24054925	10.06069784	10.04921802	10.16435286	9.727199543	9.765884531	9.783295999	9.786055426	9.918784976	9.828743655	9.895461222	9.974576164	10.03342376	9.851386783	10.01283722	9.564062129	9.699777042	9.685696964	10.08990511	10.36548798	9.605024766	9.74996036	9.722625697	9.88662043	9.78829567	9.742952821	9.610681452	9.807535028	9.934665067	9.991115272	9.848330779	9.981537742	10.04139269	9.830222861	10.2380461	10.41664051	9.685741739	10.1271048	10.22530928	9.943133278
MAL2	9.116408481	9.099024216	8.629195459	8.55077852	8.525899592	8.343447986	9.128754573	8.515860604	8.96167258	8.963197353	8.799733306	8.951279221	8.966793859	8.642345791	8.90297597	8.829142894	8.796941872	8.939649023	8.694192644	8.512897758	9.095204233	9.127104799	8.575591922	8.97894249	8.718053047	8.994506318	8.822540733	9.134463992	8.355662201	9.155457502	9.085540306	8.662115357	8.509605706	8.567461621	8.396460893	9.134686993	8.53984109	9.110286609	9.082857149	8.525433555	9.061866973	9.069853021	9.029464947	9.201424438	9.050611731	9.088455045	9.086893472	8.915378727	9.036987998
EHD4	9.93928457	10.16435286	9.81693694	9.806342804	9.749751771	9.800957523	10.57170883	9.972790451	9.838987539	9.877371346	9.858639443	10.01283722	9.835525699	9.698970004	9.831869774	9.893950304	9.716512506	10.17897695	9.762123152	9.74561342	10.50785587	10.54900326	9.845674648	10.09342169	9.646570354	9.894316063	9.829290905	10.0211893	10.62324929	9.942504106	10.15836249	9.844719418	9.824295091	9.749744043	9.837828244	10.55870857	9.968286771	10.48995848	10.53402611	9.866027275	10.07918125	10.17897695	10.36172784	10.17318627	10.08990511	10.21748394	9.753583059	10.52633928	10.25767857
AQP1	9.523564389	9.931361237	8.930969397	9.295061045	9.794488047	9.465382852	9.570601309	9.463041475	9.313951541	9.292123104	9.693207947	9.94133251	9.691152247	9.174902562	8.952254689	9.423458872	9.16429336	9.892083467	9.209836595	9.075437462	9.848767791	9.024033898	9.544514518	9.281987312	8.546629022	9.753330221	9.650851265	10.22271647	8.029262	9.55674863	9.917379457	8.983084773	9.356962311	9.81377441	9.477685471	9.534800035	9.514720374	9.839748219	9.029627239	9.56543457	9.280441779	9.336919802	9.136339997	9.376339673	10.00860017	9.640958204	9.706717782	9.567485134	8.873942239
CDC42	10.07918125	10.15533604	10.1430148	10	10.09342169	10.00860017	9.994849244	10.1271048	10.11058971	10.05690485	10.09691001	10.18752072	10.08635983	10.0374265	10.15836249	10.23552845	10.26717173	10.19589965	10.08635983	10.14612804	10.17026172	10.33041377	10.05307844	10.17609126	9.990010123	10.15836249	10.06069784	10.1271048	10.30963017	10.10720997	10.14612804	10.13987909	10.00432137	10.07554696	10	9.977106011	10.11394335	10.15228834	10.3283796	10.07554696	10.16435286	10.17609126	10.2278867	10.13353891	10.23044892	10.2121876	10.14612804	10.32633586	10.31597035
RALB	9.956648579	9.885112334	9.885496916	9.762746065	9.947477835	9.67741531	9.731338914	9.878452854	9.696356389	9.966080693	9.846040057	9.884693432	9.939009781	9.976744196	9.825847873	10.0374265	9.764781182	9.82842142	9.915098944	9.928759319	9.844588997	9.983914819	9.708174362	10.10037055	9.861946407	9.827924711	9.989124865	9.845674648	9.976877049	9.931015214	9.828563233	9.740465329	9.744152108	9.91999281	9.642048823	9.691815016	9.681847017	9.78396072	9.935673495	9.69200041	10.06069784	9.949062943	9.981583055	9.973257199	9.895361763	9.850039392	9.938934808	9.981170532	10.00432137
CD63	10.5378191	9.972799699	10.38381537	10.42324587	10.29003461	10.33445375	10.00860017	10.32221929	10.2764618	10.23552845	10.20139712	10.18184359	10.4456042	10.28780173	10.05690485	10.28103337	10.25285303	10.09691001	10.16731733	10.26717173	9.98192728	9.865015092	10.40140054	10.41161971	10.47421626	10.2121876	10.23299611	10.38381537	10.12057393	10.51982799	9.954604271	10.26951294	10.38560627	10.26007139	10.28103337	9.97328491	10.23044892	9.952327397	9.820851429	10.39794001	10.38916608	9.909117234	9.706564174	9.764572124	9.615129059	9.600951126	10.0374265	9.594768114	10.10720997
CD81	9.778071623	9.702482235	9.92421724	9.637419676	9.897385138	9.724578951	9.822867358	9.811615217	9.417372035	9.526016021	9.710827909	9.763772298	9.62173697	9.402862958	9.818199492	9.813080361	9.646403726	9.847134442	9.656510251	9.984590315	9.770572207	9.196120893	9.59574967	9.791690649	9.101953178	9.696950188	9.485962634	9.778621481	7.930347838	9.789496101	9.700409474	9.919987588	9.61887404	9.797869733	9.71154573	9.753322557	9.786517181	9.687528961	9.1987945	9.570986348	9.821873654	8.99571415	9.191423067	9.387389827	9.438637266	9.766851382	9.352182518	9.123590333	8.98186842
BDH2	8.90231843	8.863334759	8.709431096	8.727411113	9.348791468	8.785842143	8.815345266	9.034026524	8.940436791	9.127039974	8.890169425	8.941108754	9.16301221	8.78096503	8.591209349	9.053078444	8.883973561	9.26867156	8.782436791	8.858176139	9.196563035	9.194347808	8.7110645	8.894543122	8.779018973	8.843425894	8.985543229	9.175569793	8.82783434	8.918208634	8.892128009	8.768519709	8.791732744	9.304318155	8.850689112	8.87229033	9.126033948	9.1823005	9.114444173	8.776962554	8.882621291	9.293428854	9.093561758	8.925760597	9.232945313	8.967370104	9.381548256	9.093526744	8.769820259
LAMP1	10.07918125	9.447158031	10.41329976	10.26717173	10.01703334	10.2121876	9.78140349	10.38201704	10.09342169	9.938609777	10.0211893	9.818885415	9.917762754	10.04921802	10.10380372	9.972665592	9.946521039	9.700158344	10.00432137	10.15836249	9.694350689	9.481901047	10.10380372	9.965925706	10.10037055	10.02530587	10.02530587	10.13353891	9.42398273	10.08278537	9.499687083	10.36735592	10.20951501	9.994866823	10.17609126	9.80618676	10.25767857	9.678044676	9.490829006	10.13353891	10	9.888168257	9.546036514	9.299529089	9.409933124	9.414973348	9.764766252	9.451740395	9.664933288
PROM2	10.13672057	10.30103	9.327481542	9.547368518	9.617430227	9.497496351	10.07918125	9.515714927	9.61734638	10.05307844	10.03342376	10.06069784	9.941436891	9.156791368	9.3829531	9.499851973	9.417072923	9.915262612	9.309928111	9.336039246	9.843562891	9.884942558	9.851258349	10.01283722	9.46170857	10.06818586	9.702766468	10.1903317	10.12385164	10.13987909	10.29003461	9.355719639	9.570204245	9.6263301	9.522222465	10.07918125	9.527810283	9.839710531	9.877371346	9.879250752	10.01703334	10.04139269	10.24551267	10.2380461	10.40654018	9.970058491	10.36172784	10	10.11394335
CD177	7.969728012	8.040602344	0	8.747248626	9.134368385	0	0	0	8.914697431	9.206663997	8.319460018	9.252513227	9.088702961	0	9.433545831	9.130333769	9.547873118	8.688099323	9.215452493	9.260071388	8.55224223	8.241322305	8.358810174	8.676711896	7.594646654	8.325618275	8.800682719	8.400036925	0	8.003503619	8.061414782	0	8.809754936	9.134686993	0	0	0	8.522613746	8.209702635	8.375261136	8.645314175	0	0	0	0	8.472522424	0	0	0
TPM3	8.968389542	8.599653862	8.614116472	8.7646692	8.795727119	8.670894954	8.51148229	8.876812279	8.568389488	8.979607552	8.747411809	8.706000477	8.873105437	8.833446743	8.596443142	8.680063428	8.82632105	9.036309444	8.787297496	8.445666465	9.226574131	9.380627241	8.862578568	9.102913703	8.969802505	8.915478983	8.67986379	8.803859813	9.367486376	8.957027522	8.588294123	8.597552592	8.738915265	8.760708903	8.66357844	8.433337726	8.90522904	9.19587199	9.334775332	8.836229144	9.057057209	8.925894543	8.950705535	9.032497883	8.667312836	8.970314327	8.85287629	8.868438703	8.841309405
VTA1	10.01703334	10.39445168	9.591053471	9.703497727	10.00432137	9.984158119	10.05690485	9.757729973	9.829458161	10.15228834	10.17609126	10.41329976	10.1172713	9.577905217	9.608044406	9.722345943	9.709227547	10.07554696	9.686305508	9.713507343	10.08990511	10.03342376	9.804820679	9.974124662	9.505706062	10.07554696	9.856269588	10.44715803	10.15836249	10.0211893	10.372912	9.599883072	9.714380061	9.989569944	9.999500274	10.02938378	9.757616157	10.04532298	10.00432137	9.801965939	9.961421094	10.21748394	10.17026172	10.46834733	10.47275645	10.07554696	10.34439227	10.06069784	10.1271048
PSME2	9.232564141	8.747186445	9.383366483	9.347681213	9.12946431	9.265831566	8.725593143	9.410524173	9.167996312	9.130365938	9.156215883	9.013511334	9.095657441	9.365581573	9.264510876	9.124373787	9.297213196	8.830505267	9.196120893	9.088242434	9.197749068	8.881789658	9.296511625	9.011443562	9.338556091	9.148540961	9.292300385	8.897165065	8.810064416	9.109207197	8.598297955	9.516416373	9.5132176	9.131714879	9.442495447	8.745707027	9.579371965	9.185513825	8.686421751	9.315571535	8.8731636	7.007619817	8.30909762	7.725053633	8.175859576	8.632416798	7.612656738	8.288383387	7.957966262
MUC1	10.82085799	11.35983548	10.21484385	10.56937391	10.80888587	10.58546073	11.43616265	10.54777471	10.59106461	11.04139269	10.94250411	11.24303805	10.87215627	10.46686762	10.62324929	10.87448182	10.53402611	11.19865709	10.56110138	10.31386722	11.1430148	11.30963017	10.9132839	11.07554696	10.43136376	10.93399316	10.7084209	11.14612804	11.33645973	10.81090428	11.3283796	10.25527251	10.61700034	10.81756537	10.6242821	11.39445168	10.59328607	11.11058971	11.20951501	10.92839585	10.97818052	11.20682588	11.17026172	11.44715803	11.28555731	11.30749604	11.40312052	11.60638137	11.56110138
BCAM	9.820129181	9.691452828	8.810165285	9.224455365	9.488226285	8.945655656	9.560014288	9.341493878	9.105237601	9.566838013	9.353973903	9.43269677	9.439301108	9.061565562	8.946181976	9.305630776	8.740054627	9.840557727	8.895372815	8.868761959	9.506707926	9.429881419	9.525511261	9.915236218	9.287756955	9.548598223	8.889296099	10	9.123884294	9.807541793	9.639257329	8.837196892	9.22934902	9.477121255	8.988527744	9.525873713	9.368138065	9.467089899	9.411973058	9.517195898	9.896823729	9.511575905	9.602244527	10.01283722	9.534926777	9.992566772	9.609594409	9.158392651	9.183383742
PVR	8.567919929	8.114444176	0	6.963938907	8.020278398	6.822423152	7.711393829	7.00470824	0	7.333366676	7.404628507	7.223781422	7.499109486	7.170730999	0	7.480955042	0	8.201697478	0	0	8.163638363	8.188591039	7.761454222	8.351042208	7.399812137	7.325392521	0	7.995679065	7.471717009	8.486841201	8.021933171	0	7.275011761	7.958057154	0	7.783410439	7.088702996	8.072764425	8.129012796	7.845364745	8.400693377	7.356446575	7.899678272	8.145134229	7.520627632	8.137385767	7.565930433	0	7.144729872
MUC20	7.140067901	8.744183418	6.814041124	7.093911776	7.993078952	7.381078981	8.949038526	6.67318694	7.914892956	7.613440109	7.667508997	8.955961804	8.008387234	0	6.667602455	7.030640235	6.877791671	8.446537169	6.873332287	6.986950833	8.54660435	8.704124768	6.568072708	0	0	7.30505029	7.977311978	8.467252832	8.887144495	7.237141452	8.660438561	7.079181282	7.210184732	7.989681147	7.450618579	8.872039669	0	8.577606679	8.719182077	7.345020681	0	8.063183192	7.989974574	8.486175355	8.690913404	8.322177933	8.779683054	7.844756681	8.33260003
MUC6	6.2581824	8.643028046	5.751033396	8.493987527	8.072727693	5.242618442	6.9293781	5.721753749	0	10.1271048	6.768038479	6.697107322	7.118165518	6.602981996	7.724046379	9.8152323	0	8.193319433	10.1172713	6.140791091	8.103632709	8.219165224	6.767719786	7.694148739	7.898286284	6.290235231	5.635846513	7.598702994	7.243360572	7.090610743	8.829766774	0	8.594933701	7.972073184	0	7.173681519	0	8.084647764	8.231418616	7.057475954	7.698978699	7.74774576	0	7.087923356	0	6.880121656	0	6.776977142	6.774232282
ANXA6	7.485181786	7.476672266	7.636046367	7.928554592	7.90039991	7.866671245	7.718642841	8.082893037	7.668684052	7.161158322	7.895930589	7.918617397	7.764280777	7.550154957	0	8.139784667	7.902465245	8.225283433	7.877492292	7.866694859	8.186306387	6.637179508	7.996196348	7.030478321	7.466719387	7.777847145	8.091068735	7.828150565	0	7.519631152	7.493095421	7.687511134	7.978271846	7.929827486	7.922263423	7.73240181	8.13630827	8.188591039	6.458743728	8.020858286	6.791788933	6.703532194	0	6.452047394	8.030559249	7.81951104	6.735766598	7.619958979	0
APOE	9.217457623	9.644556749	8.381205363	8.826068321	8.787403794	8.782286254	9.127104799	8.835316347	8.851881818	8.865394198	8.496265252	9.277471685	8.958654651	8.26237989	8.787722531	8.483558772	8.349471801	8.884682105	8.380120756	8.204309948	9.603501625	10.05307844	8.850676862	9.19248382	10.05690485	8.741569141	8.487463622	9.323128293	9.543906705	9.148016209	9.534165769	8.335959108	8.782479791	8.738439647	8.746704242	9.040800062	8.840971311	9.50747806	9.962842681	8.804173521	9.120837061	7.971141275	8.944477737	7.826515362	8.698631123	8.726947153	8.300225809	8.570017267	8.775173386
ACTN4	9.817175189	9.844241014	9.94912154	9.915689972	10.07918125	9.834541501	10.14612804	10.04139269	9.945635968	10.03342376	9.824756958	9.780093986	10.00432137	9.948887105	10.00860017	9.960123393	9.877532592	10.0374265	9.950963301	9.842615479	10.27415785	10.31597035	9.917495007	10.03342376	9.990574145	9.849873742	10.03342376	9.886445601	10.01703334	9.761145705	9.77003418	9.974709682	9.933487288	10.02530587	9.857332496	10.07918125	10.04532298	10.20411998	10.2380461	9.874209211	9.965121704	9.895129602	9.856662443	9.63192042	9.878717069	9.883587627	9.788316883	9.899371755	9.702938639
DPEP1	9.861349184	10.63042788	9.646913209	9.852290864	10.31175386	10.35218252	9.994950312	10.14612804	10.17026172	10.2764618	10.54654266	10.68304704	10.37474835	9.498103698	10.18184359	10.38021124	9.854482154	10.71516736	10.15228834	10.00860017	10.48287358	10.33041377	9.909935604	10.33845649	9.851258349	10.5276299	10.1903317	11.13353891	10.01283722	9.882222761	10.61278386	9.632102828	9.812853219	10.28780173	10.33445375	9.964405785	10.07554696	10.45178644	10.30963017	9.93920465	10.30103	10.54032947	10.43296929	10.07554696	10.24303805	10.38021124	10.04139269	9.935416568	9.793741506
PEPD	8.84148461	8.771866634	9.119288889	9.002770629	9.142483324	8.978463561	8.736739022	9.201479059	8.897478637	8.826081285	8.936835324	8.954888645	8.967538617	8.937091413	9.03430753	9.150049945	9.008898115	9.186447761	9.014478536	9.200357946	8.994915161	8.815265529	8.910165326	8.816850874	8.917001079	8.977764747	8.935960469	8.986856794	8.256188385	8.797648335	8.675356671	9.027838679	8.957588134	9.079181246	8.951157741	8.69338395	9.118363945	8.92343055	8.759682951	8.862959805	8.754287164	8.993462685	8.757608569	8.605186489	8.833191751	8.812619274	9.225541877	8.783424735	8.253022836
SUSD2	8.494210271	9.137322456	7.334976219	8.457351948	9.159085714	8.740844095	8.599708447	8.895140661	8.786758519	8.755859618	9.068890555	9.133953845	9.124047519	8.245389274	8.649831191	9.002986341	8.799450833	9.288115026	8.778274284	8.711005364	9.291057895	8.874040922	8.587475239	8.925296618	7.790348516	9.050611731	9.195595263	9.423147532	8.005437927	8.451172159	9.042299808	7.221831404	8.407135864	9.1441693	8.774042268	8.496611419	8.858446961	9.284566077	8.797842065	8.572023088	8.85571294	8.968954346	8.856638278	8.403618046	9.335638401	8.937342334	9.264392762	9.006380459	8.333165045
RAB7A	9.563777633	9.525653689	10.14612804	9.957444456	9.780122808	9.931849271	9.597322147	10.04532298	9.852534887	9.661831609	9.738249253	9.693348755	9.677533956	9.791739759	10.11394335	9.772673695	9.921925662	9.696251516	9.848158315	10.08278537	9.64903289	9.582142938	9.824373188	9.654936614	9.731040515	9.902785874	9.827168883	9.812859902	9.759562091	9.570204245	9.502099227	10.19865709	9.97805263	9.779625347	9.93349235	9.571650612	10.10380372	9.613831255	9.507855872	9.838553166	9.656366557	9.686698818	9.58463648	9.561864308	9.709117253	9.708012761	9.599107634	9.646040846	9.612900359
ASAH1	0	7.493987539	7.159507068	7.475685728	0	7.343605528	8.279598512	7.39892909	0	0	0	0	0	0	0	7.194708579	0	7.186871643	0	7.09919709	7.707306121	7.326847719	0	0	7.319272684	7.050379795	0	7.502754779	0	0	7.384908716	7.064944463	7.509793742	0	7.128754605	8.234871461	7.500552075	7.594735	7.263967308	0	0	0	0	0	7.429768441	0	0	0	0
TLN1	9.632275033	9.298022978	9.522483358	9.435350569	9.357305808	9.440389506	9.371067862	9.565103688	9.468539323	9.384245858	9.350151067	9.255320758	9.339033841	9.443747875	9.542302466	9.31835555	9.401503932	9.356427442	9.409983816	9.438763791	9.345530558	9.480006943	9.447158031	9.359247175	9.556447242	9.374748346	9.428928115	9.312473558	9.522444234	9.534026106	9.177709606	9.521229642	9.414672579	9.297147472	9.453761584	9.279575696	9.581369302	9.252488945	9.366030514	9.403257826	9.272792761	8.723529554	9.115810142	9.147892645	8.936005764	9.438969314	9.039969027	9.048014291	8.95278276
KIF12	9.604366474	10.24797327	9.180498624	9.28780173	9.650307523	9.607958727	9.84908143	9.48390096	9.66807826	10.0211893	10.02938378	10.08278537	9.949228946	9.281215233	9.283459537	9.480251345	9.564666064	9.952492158	9.488550717	9.39590274	9.948227079	9.838666523	9.463205932	9.921093141	9.18704104	9.99024115	9.475845452	10.14921911	10.01703334	9.579154557	10.21484385	9.161098357	9.2987876	9.621342487	9.601451553	9.812485533	9.489578833	9.922922584	9.78356058	9.45463147	9.891208407	10.25527251	9.934175135	10.3283796	10.46686762	9.910789768	10.04532298	9.869577844	9.885112334
PPT1	7.253628754	7.515211318	0	6.846813276	6.986677746	0	8.02685999	0	7.133570873	0	0	0	0	7.144231649	0	0	0	7.202570073	0	0	7.224636665	7.091983367	0	0	7.144823225	0	0	7.238898817	0	7.223625743	7.467045467	0	6.841497184	6.962018775	0	7.94120822	0	7.178458965	7.052078069	0	0	0	0	0	0	0	7.321681284	0	0
CD9	10.84260924	11.0211893	10.31386722	10.14921911	10.50379068	10.39269695	10.76042248	10.15836249	10.31175386	10.94448267	10.57518784	10.8260748	10.71683772	10.39445168	9.95476335	10.39093511	10.2121876	10.68033551	10.48000694	10.23044892	10.5289167	10.62117628	10.68033551	11.41329976	10.4456042	10.06818586	10.22271647	10.68930886	10.64443859	10.81491318	10.96284268	10.34635297	10.16435286	10.50379068	10.43296929	10.71683772	10.05307844	10.49415459	10.60852603	10.65705585	11.42975228	10.78816837	10.76566855	11.04532298	10.59217676	10.39269695	11.2278867	10.44715803	11.00860017
EPS8	10.11058971	11.01703334	9.657055853	9.914528262	10.02530587	9.842284646	11.09342169	9.758639427	9.898631952	10.19865709	10.20411998	10.34439227	10.1430148	9.645766032	10.25285303	10.2764618	10.13353891	10.30749604	9.747411808	9.570916366	10.40993312	10.4785665	10.18184359	10.15836249	9.559020383	10.3783979	10.00432137	10.29446623	10.42651126	10.11058971	10.99122608	9.678436429	9.943212479	10.02530587	9.88111064	11.07188201	9.796775477	10.40140054	10.46834733	10.20411998	10.1430148	10.40483372	10.52244423	10.49136169	10.54157924	10.6919651	10.39269695	10.96801571	10.93043959
TPP1	7.858146042	8.54069228	8.163876659	8.322777317	8.304727432	8.003891171	8.664030526	8.512203954	8.550912899	8.116707345	8.022675766	7.679273422	7.726735365	8.155578935	8.671432047	8.172106481	8.366628383	8.806302103	7.931203531	8.1498347	8.002597985	7.990649593	7.947781611	7.966352964	8.082534056	8.088773771	8.110791664	8.505706063	7.570367798	7.760347086	8.582472454	8.163459555	8.276760425	8.382665299	8.017742668	8.663926964	8.510276846	7.989561051	7.972406515	7.909213599	7.928549472	7.838735788	8.170291062	7.922932962	7.890650128	8.472434632	8.217431302	7.652314053	7.51029027
CD59	10.5132176	10.79934055	9.874481818	10.17609126	10.32428246	9.96508876	10.72181062	10.1172713	10.06818586	10.46834733	10.42324587	10.63848926	10.37106786	9.954777809	10.00860017	10.17897695	9.960132914	10.50242712	9.942632987	10.05307844	10.62117628	10.79865065	10.30319606	10.50379068	10.00860017	10.33243846	10.10380372	10.62736586	10.89652622	10.5378191	10.8162413	9.940884881	10.22530928	10.35602586	10.01703334	10.72263392	10.15836249	10.6294096	10.80482068	10.34439227	10.50920252	10.6794279	10.76417613	10.8591383	10.71180723	10.64443859	10.59988307	10.76042248	10.77670118
ARF5	8.590763839	8.583164756	8.615897472	8.502358831	8.401072975	8.509094945	8.780770816	8.527823165	8.547134481	8.693357555	8.612730892	8.644054351	8.59211011	8.519289714	8.587677299	8.631879875	8.558912474	8.617943436	8.627068715	8.647627437	8.626371168	8.580023536	8.484741031	8.508246832	8.434329339	8.51030367	8.511201319	8.641493942	8.765713249	8.554198323	8.566743807	8.714664994	8.508246832	8.375645329	8.518382317	8.746525223	8.59034018	8.566802689	8.580217675	8.477728843	8.513497272	8.542252628	8.541566765	8.555541821	8.783296	8.5448243	8.596267127	8.855858222	8.679999917
RAC1	10.04532298	10.21484385	10.00860017	9.946054143	10.0374265	9.918025092	10.05307844	10.00432137	9.924780503	10.13672057	10.0374265	10.21748394	10.09342169	9.908308048	9.980035204	9.986677702	9.95201224	10.13672057	9.910090546	9.875061263	10.18469143	10.26717173	9.995635195	10.2278867	9.993242188	10.04532298	9.908190027	10.1931246	10.34439227	10.02530587	10.16731733	10.04532298	9.982271233	10.0211893	9.963315511	10.00860017	10.04139269	10.1430148	10.23299611	9.987630519	10.20951501	10.22271647	10.31175386	10.38916608	10.26717173	10.13033377	10.31597035	10.43616265	10.34830486
MIF	7.290123711	0	8.234390725	7.637069251	7.263801732	7.746283828	0	8.006850965	0	7.074194567	6.984252743	7.329723244	7.346587684	7.335337545	8.141512486	0	0	7.130269456	0	0	0	0	7.120277753	6.85672291	7.571778698	0	0	7.151032612	0	7.414120643	0	8.380446423	7.689601851	7.317269208	7.898418002	0	8.142170389	0	0	7.198162067	0	0	0	0	0	0	0	7.168084826	0
BID	7.495183446	0	7.853661721	7.73330162	7.515542714	7.758828665	7.208683188	7.930317246	7.272305868	7.566885121	7.403343636	7.371511189	7.455210443	7.655541805	7.515158271	7.305200867	7.466140733	7.388172293	7.583504838	7.556869139	7.722691504	8.072249901	7.657409659	7.675842482	7.644537068	7.442432747	7.666536709	7.548659629	8.084897862	7.507343061	0	7.952545454	7.853892816	7.494571998	7.915009169	7.232360738	8.116541336	7.605121817	7.983856231	7.645068411	7.587183218	0	7.883411579	0	6.808609355	0	0	0	0
CD44	8.230295616	8.332377858	8.137354115	8.153570984	8.061753972	8.149803941	8.293539333	8.332781722	7.867443922	8.260214541	8.38533811	8.210826641	8.22634209	8.183981222	8.329560584	7.944828001	7.838742084	8.107447413	8.004407368	7.945768849	8.750485253	8.844856009	8.474624136	8.143077287	8.786950074	8.103564283	8.052000984	8.429832998	8.953203787	8.199645496	8.170906812	8.120211872	8.062845117	7.952206215	8.084325999	8.259307124	8.257222449	8.691762032	8.814959735	8.401159201	8.098470669	8.34879147	8.10897072	7.954295591	7.799602433	8.068074494	8.013005854	8.216588114	8.688161661
GGH	7.576571696	7.951551218	7.431202901	7.326458778	7.299681613	0	7.603555739	8.145382895	7.250420027	6.95168234	7.427388739	0	7.554925065	7.48859303	7.350558137	7.418549879	7.39647834	8.578398506	0	0	7.110084457	7.588988413	7.212959616	7.390599564	7.310693334	7.392098745	7.334936053	7.266114073	7.647089439	7.384532633	7.991159601	7.430075072	7.181872188	7.387550005	0	7.417322214	7.913670835	0	7.263233562	7.120508157	0	0	7.163668184	7.447747047	7.305931496	7.430736013	7.642761213	0	0
PPIA	9.928882113	10.33445375	10.51587384	10.31175386	10.25042	10.40312052	10.43616265	10.4440448	10.41497335	10.32014629	10.35410844	10.34439227	10.31175386	10.30963017	10.65127801	10.36735592	10.39619935	10.29885308	10.40993312	10.48429984	10.07188201	9.929296284	10.27415785	10.2278867	10.25285303	10.30749604	10.35410844	10.16731733	9.644389347	10.02530587	10.34830486	10.51188336	10.33445375	10.25285303	10.40654018	10.42651126	10.42813479	10.06818586	9.94597054	10.28555731	10.2278867	10.22530928	10.17897695	10.36548798	10.39619935	10.34044411	10.26007139	10.40654018	10.32428246
CRNN	7.413383613	7.218167775	5.13833744	5.97358547	6.367803219	5.72088748	7.05922255	6.118760921	6.114244248	6.803962201	7.233909479	9.550692983	6.512937883	0	5.434314959	6.086217772	5.163045031	6.550057171	5.825147535	5.979389469	6.792832835	7.090822199	6.692591465	6.8813733	6.437147997	6.493778739	6.282100964	7.008387273	6.998036945	7.68953972	6.887791714	0	0	6.871491264	6.40937528	7.414287975	0	7.262949198	7.310884424	7.138207964	6.936744953	7.13286782	9.039176085	8.643047805	8.057095293	6.613577678	8.830620743	7.247285727	7.952618114
STIP1	9.211067119	8.662058622	9.367225427	9.261286665	9.127169614	9.307496038	8.753077237	9.38799457	9.396199347	9.209005358	9.250517586	9.207957343	9.207742053	9.396391162	9.56877649	9.238923846	9.348071099	9.096110175	9.384227929	9.26955964	8.821834382	8.650831859	9.273093912	9.08120324	9.359493981	9.194680813	9.311923309	9.021809277	8.680281111	9.076385544	8.48938185	9.394836771	9.233326151	9.085361944	9.29666519	8.625631366	9.41640749	8.786332538	8.479532125	9.222950459	8.957032317	8.097326739	8.007705119	7.491095446	8.778823886	8.816108671	7.904336798	8.494363341	8.106190901
LMAN2	8.571941636	9.003417446	8.697281665	8.661301451	8.440846138	7.539916273	8.701049632	7.934508556	7.717046076	7.835994794	7.744558964	6.990143467	7.564192472	7.738273065	8.068260097	7.459120984	7.710438954	8.765467378	7.958812258	7.505638299	8.911141623	8.322136566	8.330413775	8.853838089	8.330109257	8.287555413	7.722740846	7.883860092	7.752831785	8.560444674	8.849640498	8.667947674	8.617660723	8.355279073	7.627857243	8.621186673	7.89179941	8.790123242	8.329743552	8.346118159	8.792573776	7.785714129	7.903030273	8.351970146	0	9.394048721	7.907083371	0	0
G6PD	8.849904423	8.593219589	9.195096711	9.153967222	8.786588177	9.145879797	8.548794654	9.25925931	9.029911105	8.889408162	8.821198994	8.671829807	8.791023611	9.005395032	9.129399836	8.753008216	8.94928264	8.705119303	9.016239191	9.077694866	8.68420781	8.828898243	8.978819387	8.789904903	9.127914295	8.913543659	9.036828434	8.570180878	8.942865868	8.984905188	8.735079672	9.28422764	9.156215883	8.781683585	9.255007022	8.808406801	9.307153602	8.619176842	8.844495815	9.071808392	8.810084591	7.504566016	8.210318523	7.602851867	7.965131121	8.671200623	7.728475538	8.229579465	8.068890558
CAND1	9.380862196	9.096597209	9.644950381	9.471746309	9.295742981	9.538611431	9.127946643	9.672097858	9.491557783	9.268741738	9.328399993	9.234947316	9.300269315	9.464146627	9.679073411	9.349937697	9.514800022	9.272653698	9.409578107	9.563967318	9.138365864	9.116840103	9.352336907	9.198162039	9.507289031	9.394311563	9.466867621	9.242690474	9.124112793	9.254137031	9.002122847	9.655397781	9.417421867	9.194153436	9.438431586	9.05149982	9.672984023	9.031287249	9.013721778	9.278319089	9.127396391	8.61954201	8.890962851	8.865494842	8.95649499	9.173652375	8.987152135	9.028489917	8.892873407
GRB2	9.347271455	9.509202522	9.312113859	9.195152134	9.227218045	9.211974402	9.665580991	9.173186269	9.195844325	9.324508806	9.25379823	9.555807606	9.336459734	9.028367884	9.041826763	9.186362941	9.141041941	9.388704956	9.107481319	8.977709891	9.360574482	9.406778551	9.209461395	9.455058145	9.152043603	9.307025119	9.18446429	9.518066254	9.498310554	9.300029968	9.444044796	9.260023661	9.190975658	9.169762577	9.203386492	9.615476592	9.180183242	9.321432717	9.349316389	9.189827063	9.407594831	9.383617915	9.331528519	9.655128827	9.530942104	9.338277161	9.433049412	9.503858749	9.504864879
THY1	9.120573932	10.03342376	9.086217416	9.377178713	9.889576202	9.6740432	9.991868179	9.542962289	9.585675004	9.95236617	9.842615479	10.17026172	9.943469783	9.049218023	9.264935822	9.575257142	9.481170213	9.83879244	9.369623977	9.477121255	9.663314505	9.654965451	9.521412701	9.759501648	9.249369595	9.759690503	9.748350857	10.16435286	9.272908613	9.137132476	9.980280686	9.108734109	9.407424899	9.878665388	9.678918802	9.947100275	9.557073894	9.625898662	9.631514793	9.50726202	9.746999849	10.06818586	10.01283722	10.13033377	10.26245109	9.897676565	10.10037055	9.458350742	9.976359151
PROZ	0	7.559727139	0	0	0	0	7.323705778	0	0	0	0	0	0	0	0	0	0	0	0	0	7.251589582	7.276944109	0	0	7.13906011	7.413517712	0	0	0	0	7.489930383	0	0	0	0	7.263565085	0	7.044265339	7.211547708	0	0	0	0	0	0	0	0	0	0
DDAH1	9.407458891	9.39740115	9.959518377	9.709736238	9.666873507	9.741151599	9.334453751	9.700695066	9.739770066	9.564216153	9.592176758	9.526881807	9.594337293	9.67866403	9.717845184	9.693726949	9.756506789	9.54385705	9.672430382	9.86526984	9.373794417	9.181414797	9.73926372	9.527539682	9.626586706	9.682343669	9.639476528	9.543422327	8.838401979	9.373518855	9.324261872	9.920123326	9.681792803	9.600504607	9.696356389	9.255875274	9.674916228	9.311753861	9.120573932	9.682145076	9.469483282	9.369994662	9.002511632	9.233478392	9.322053818	9.230397825	9.339729619	9.227861006	9.113809703
ARPC3	8.93511915	8.74917183	8.824665925	8.789834447	8.88902703	8.824555359	8.981691788	8.841672251	8.949468076	8.847276449	8.860894745	8.81993857	8.960808379	8.922434794	8.83729797	8.8827806	8.897951317	8.892706638	8.953479412	8.769458565	9.091737283	9.165363051	8.756468748	8.944655369	8.818667884	8.840118647	8.919867477	8.677177922	9.111531344	8.879858238	8.776301566	8.679881943	8.882575763	8.846881187	8.822468843	8.909095819	8.695770527	9.041550582	9.098712931	8.747978585	8.914993319	8.722897052	8.675154857	8.55114491	9.001690455	9.002727473	8.320540922	8.965841144	8.386088557
GP2	7.33025141	8.134973543	8.138933943	8.107854151	8.231546047	8.081491332	7.780864344	8.598538829	8.57636439	8.261714778	9.154363101	8.583368831	8.807548558	8.630865002	8.408341743	9.063671054	8.580696941	7.820890796	9.209836595	8.911210894	8.03522956	7.323004471	7.791213301	8.461288383	7.804984026	7.863019349	8.23957474	8.460160872	0	7.551132713	7.96004246	7.96377367	7.829387413	8.004063305	7.903984802	7.521974485	8.548622782	7.761582076	7.425843871	7.435095502	8.211173959	0	0	0	7.03814313	7.828344055	0	6.87741748	7.906782043
EHD1	9.809579914	10.21748394	10.08990511	9.928206319	9.859732568	9.965201701	10.48429984	10.04139269	9.855270743	9.8131605	9.857428996	9.862125414	9.836874548	9.759131254	10.00860017	9.919156572	9.893201199	10.11058971	9.743831055	9.878521796	10.10380372	10.22530928	9.846837932	9.972984605	9.6811417	10.00432137	9.849511546	10.15836249	10.1430148	9.76917047	10.1931246	10.10380372	9.953111873	9.831152821	9.963376942	10.45484486	10.06818586	10.07918125	10.18469143	9.860960548	9.955437586	10	10.04139269	10.01703334	10.03342376	10.09342169	9.900569206	10.38021124	10.12057393
CD14	7.57971503	7.753437511	7.340245781	7.651278024	7.659878195	0	7.233985504	7.8849086	7.56987699	7.764318141	7.7349038	7.75363668	7.840476223	7.554210456	7.884427167	7.409781026	7.328929789	7.757297322	7.271283889	7.910779107	7.965069939	7.862489173	7.516178286	7.776526857	8.342915919	7.331730913	7.300682443	7.490492249	7.92175929	7.591276146	7.70587227	7.377379131	7.473808025	7.635594327	0	7.173652404	7.872424351	7.967370108	7.811635327	7.539051007	7.845587902	0	8.481241919	7.575961044	7.368640147	7.859816546	7.405534195	8.064757403	7.229758637
GSTO1	9.18235758	8.942509064	9.600972896	9.435015742	9.385463273	9.464757732	8.734023325	9.530199698	9.447808985	9.406216468	9.341948647	9.225309282	9.213464629	9.430993652	9.431106328	9.417787127	9.144231618	9.355144896	9.420186871	9.507397058	8.819451803	8.760814379	9.357019579	9.252221754	9.165363051	9.345510958	9.293008787	9.284047032	8.908945878	9.151400498	8.84067683	9.588831726	9.407662785	9.346352975	9.43836828	8.681575878	9.506924242	8.745035735	8.708242387	9.319626484	9.199096657	9.215769709	8.999095727	8.992425376	9.147552664	8.834840171	9.246227678	9.170936109	9.069816043
ACE2	9.051384085	9.203196125	8.393153867	8.692221015	9.94496112	9.140319452	9.330941101	9.441019215	8.684019059	8.949668062	8.900918524	9.157849481	9.108531199	8.678573005	8.811132444	9.556519594	8.872488425	9.480969377	8.904737179	8.793755473	10.02938378	9.515953281	9.007150106	9.139942023	8.489888201	9.068890555	9.463967604	9.617660722	8.896801698	8.939728862	9.170789591	8.462038434	8.716629279	9.956470986	9.211974402	9.307175012	9.469733676	10.01283722	9.482687826	9.035589818	9.133826214	9.470910069	9.184833334	9.167317335	9.380898331	9.198244587	9.338237299	9.522287703	9.068185862
ITIH4	7.84396119	8.789439685	7.685526786	8.484883254	8.022634544	7.425794996	9.064045963	8.436782627	7.617807347	7.54258894	0	0	7.87639684	8.116906471	8.401210928	7.513963001	7.862679872	8.116541336	0	7.698248485	8.413919744	7.671681854	7.374638402	7.589904953	8.580286174	0	0	7.401003997	8.037386657	7.727516866	8.670598343	7.378288878	8.443888548	7.83432532	7.17805564	9.056904852	8.365057223	8.32349961	7.505936438	7.054459876	7.508381576	0	8.731258286	0	0	9.295303145	7.625075696	8.129689895	8.043322978
PDIA3	8.146809966	7.019324079	8.421554574	8.61912465	8.156246193	8.181386198	7.525368799	8.166992234	8.477294939	8.305501844	7.857260114	7.889649005	8.163787313	8.445946524	8.709210582	7.913755595	8.47872518	7.512270726	8.559080322	7.996227015	8.101368967	7.768490113	8.295918793	7.945094207	8.800180752	8.222586426	8.512844427	7.298088591	0	8.029140184	0	8.241745655	8.682262438	8.001993178	8.096318974	7.337359432	7.958157592	7.996713016	7.597991206	8.19281826	7.618225975	0	0	0	0	0	0	6.814547302	0
CPVL	8.008387234	8.449061648	6.347934874	6.451648452	7.492131548	6.832770752	8.846868829	6.717512481	6.254016303	8.422294303	6.608825551	0	7.538221745	7.012963742	7.174495948	7.431990642	7.185031949	8.465204339	6.923943147	6.259450763	7.190891745	7.553931561	6.482745133	7.042536176	7.064383142	7.423851841	6.774881839	7.605100254	6.555602361	8.053616178	8.463415153	7.164263638	6.575984206	7.601571146	7.084397555	8.80827851	6.811306907	6.914105103	0	6.988536707	7.11507775	7.763285709	7.779740758	6.999965298	7.106428929	6.892256097	7.541379535	7.216113124	7.049101717
ANXA7	9.776810107	9.959766202	9.793923027	10.03342376	9.858386793	9.947419016	9.822815115	9.979334361	9.858651471	10.20411998	10.161368	10.09691001	10.15533604	9.877123601	9.965512137	9.867137369	9.948276005	9.959413485	9.891230723	10.10720997	9.958119328	9.954213556	10.01703334	10.01703334	9.705007959	9.915114785	9.943078819	10.15836249	10.18752072	9.784845433	9.92214913	9.779509912	10.05307844	9.828021517	9.959432558	9.762993482	9.969028976	9.910079862	9.950077502	10.00432137	9.992482823	10.17026172	9.984464302	10.17897695	10.45939249	9.767764195	10.17026172	10.10380372	9.97025852
NQO1	8.77495469	6.934977981	8.198354627	8.276829308	8.366628383	8.258828773	8.774392865	8.428183408	8.570729694	8.314793853	7.86962476	8.451801783	8.518632369	8.674622352	8.834929097	8.30674661	8.767593652	8.707961717	8.214764399	8.560289307	8.303671147	8.367523644	8.823024052	8.731588766	8.07503573	8.532066096	0	8.618780026	8.577721526	8.83128734	0	8.143732826	8.242938773	8.274711916	8.270911642	8.687145329	8.357763383	8.23309769	8.215478939	8.727882704	8.689610719	8.280714922	8.414706009	8.385123458	8.489100288	8.550717425	8.607798035	8.598210332	8.423180317
HEXA	7.453211298	7.480280103	8.005780904	7.508139028	7.712413982	7.25698221	7.325330926	7.630234596	7.825633809	7.392591461	7.137417447	7.047430679	7.082605909	7.463743736	8.155093011	7.410389163	7.695359085	7.871181667	7.497109428	7.731790162	7.237065978	6.733430084	7.243831487	7.451448706	7.221779283	7.198904427	7.194708579	7.584025765	0	7.250907724	7.3371197	7.917768008	7.404097888	7.60371801	7.20876376	7.155123424	7.514760213	7.133059675	6.579577944	7.187999901	7.317645564	0	0	0	7.255079467	0	0	7.238598059	0
KNG1	8.182585828	8.910026439	7.687653801	8.61466525	7.676748474	7.364044198	9.152807964	6.649334956	7.261286689	7.758116731	7.267664455	8.350867998	7.132675881	7.481385306	6.168821757	7.579600709	7.240574232	7.78822496	6.772900942	7.24951634	8.785450852	8.23434009	7.554719281	8.184521089	8.905801276	7.742458041	7.609199427	8.107549133	8.216139503	8.134304638	8.783024101	7.765139339	8.605563607	7.775246267	7.378870117	9.092650479	6.943360992	8.614907758	8.130237251	7.681720515	8.178660461	7.288226884	9.428134794	8.323870609	7.236789125	9.149219113	7.991416596	8.533530577	8.073718354
C4BPA	0	0	0	6.703618137	0	0	0	0	0	0	0	0	7.053731354	6.858073843	0	0	6.699777128	0	0	0	0	7.503518326	6.651626957	0	8.901747029	0	0	7.107888059	0	0	0	0	0	0	0	0	0	0	7.489522575	0	0	0	0	0	0	0	0	0	0
LAMP2	10.00432137	9.645628559	10.5378191	10.30535137	9.849566816	10.17897695	9.644665033	10.35602586	10.13353891	9.995196292	9.888819508	9.852864101	9.967547976	10.15228834	10.33645973	9.973898735	10.02530587	9.595738654	10.01283722	10.49136169	9.492760389	9.329133357	9.858025608	10.11058971	10.22271647	10.07918125	10.05307844	10.03342376	9.298853077	10.01283722	9.527204419	10.47712125	10.29666519	9.831466634	10.15836249	9.639297191	10.2764618	9.399188979	9.270608971	9.963990765	10.0211893	9.420516831	9.248243083	9.01300585	8.996310239	9.232208079	9.608526034	9.169615663	9.579760739
TGM4	0	7.618905385	8.942959976	0	0	8.986041327	7.959942458	0	8.601918824	9.394696778	7.505285688	0	7.956523796	0	0	0	8.488466107	8.816983277	0	7.630488906	8.869800625	8.318501586	0	0	8.961966586	0	0	0	0	0	7.891342294	8.998786625	0	0	9.124699809	7.992451895	0	8.881082087	8.348480105	0	0	0	0	0	0	0	0	0	0
RAN	9.019780731	8.846244305	9.233300772	9.129399836	8.908769094	9.194070108	8.852918947	9.169056933	9.1006462	8.987764551	8.91277985	8.895985769	8.929112257	9.037227235	9.088313316	8.916080032	8.997805622	8.782809323	8.986713526	9.004536318	8.827349885	8.794376497	9.061678616	8.904553264	9.144636468	9.014142362	9.079940598	8.89235065	8.784182068	8.97401863	8.747613759	9.254910442	9.118297802	8.871777193	9.132835805	8.772299699	9.143014801	8.736778833	8.720837102	9.016573747	8.840200224	8.79642168	8.659231434	8.692273943	8.575072327	8.745472973	8.634829803	8.646080092	8.671015395
PODXL	11.22010809	10.66745295	9.376576957	10.07918125	10.46834733	9.704141934	10.52244423	9.712018001	9.600286626	10.50920252	10.22271647	10.24303805	10.34830486	9.743478407	9.38530234	10.05690485	9.577733008	10.74741181	9.722633923	9.517908137	10.5865873	10.45178644	10.58771097	10.99431715	10.25527251	10.32014629	9.823819702	10.86569606	10.48572143	11.21748394	10.65127801	9.345412943	10.10380372	10.48429984	9.743925046	10.51454775	9.587273083	10.57634135	10.43136376	10.60314437	10.99694925	10.65030752	10.7686381	11.06818586	10.47567119	11	10.68752896	10.20411998	10.06445799
APOB	6.789143448	6.969346056	6.775967129	7.570577974	8.557495173	7.951633753	6.458622894	9.156427993	6.609893191	6.39640877	6.610266245	6.537844397	6.591754587	6.922081634	7.228990336	6.7317258	6.929684582	7.57584573	6.914686912	6.903616304	10.00432137	10.55266822	6.670663336	6.998320423	10.42651126	6.886721968	6.904071523	8.617231065	9.425517918	6.324159148	6.474391258	6.775661483	7.420104357	8.349976501	7.415624318	6.433129678	8.859024153	9.945054774	10.5301997	6.143327442	6.74128565	5.779727049	5.999152734	5.575362221	6.567884808	6.550338564	0	5.00839149	7.616989861
GSTP1	7.208199444	0	8.892473054	6.92112965	0	0	0	8.493151219	8.64483233	8.454997219	8.623259632	8.210505793	8.539790968	8.658211795	8.688036977	8.949848458	7.20197037	0	0	8.87274465	8.648662449	8.50548914	8.725192656	8.791318639	0	6.742426677	8.650851266	0	0	0	0	8.91132277	7.111060816	0	0	0	8.670218014	8.632740656	8.475932559	8.744535495	8.812151003	0	0	8.692476775	0	0	8.236083587	0	8.207822802
APOD	8.981129712	9.734143493	9.021809277	9.292632592	8.88677828	8.796539644	9.704390772	9.172106478	9.010554352	8.876466103	8.547971509	9.038103311	8.944630702	8.831633055	9.204337076	8.890353942	8.737653737	9.214843848	8.447778011	9.091772442	9.021561392	9.32130839	8.784403302	8.960584926	9.177767293	8.745316867	8.692485592	9.133475037	9.154089069	8.988277957	9.714312991	9.064495427	9.338914453	8.894338221	8.830806724	9.705007959	9.227526785	9.009578361	9.306339233	8.813380807	8.954034964	8.949897201	9.123296173	9.077549581	8.604916918	9.693058289	9.066400476	9.091068732	9.059070913
CAP1	9.735527044	9.376649942	9.869472276	9.746540792	9.589312765	9.74738073	9.404354703	9.781755375	9.824158389	9.566378561	9.581460389	9.474493075	9.584331224	9.739390362	9.74465279	9.618999363	9.720969231	9.487449485	9.717229329	9.770785758	9.488607115	9.572999317	9.721843578	9.533848288	9.814913181	9.594182535	9.65043381	9.435589573	9.476353323	9.656328231	9.266325792	9.802698487	9.668469785	9.509148737	9.689335502	9.315970346	9.709091796	9.378379729	9.49807611	9.649266691	9.439948166	9.110050716	9.167848799	9.126196368	9.167642196	9.366030514	9.106632789	9.144231618	9.236108802
MYO1C	7.594270986	8.383725628	8.171609459	8.472610199	8.662408368	7.942335517	8.896140252	8.591721121	8.472463898	8.16408506	8.45707915	8.27563379	8.330373185	8.439190539	8.439758884	8.325864439	8.646158571	8.64638412	0	8.1713461	8.357534657	8.150541544	8.426852709	8.659021984	7.741230419	8.661945131	8.488071037	8.25755859	7.067851698	7.60296023	8.369215859	8.206717966	8.515979758	8.674355854	7.978048067	8.880756445	8.61563447	8.349665986	8.140067872	8.435207105	8.650239508	0	8.223262249	8.33098164	8.76374237	8.540517171	7.971892522	8.624302728	8.005480814
PSCA	10.19865709	10.39794001	9.892695518	6.393154041	10.10380372	9.920321637	10.04921802	0	9.710328958	10.6599162	9.78604121	7.382935136	7.221935626	0	9.990423219	7.055836889	0	10.44870632	10.00860017	10.17026172	10.71432976	10.78390358	10.29666519	7.131843163	10.09342169	9.578730872	9.960713306	9.976647967	10.77959649	10.15836249	10.35602586	9.938504715	6.386820064	10.08278537	9.923565216	9.999678503	0	10.64933486	10.75511227	10.27184161	7.306682332	10.41161971	10.77524626	10.38201704	7.762686072	0	9.957837062	7.851845173	10.69722934
PRTN3	0	0	8.309225491	8.836634216	7.298700304	8.059108822	6.328705915	8.996025446	6.369753938	7.227089364	0	0	5.878631504	7.144044668	8.604657973	6.943850561	7.457700287	7.179264493	6.11991574	0	7.231495102	7.759947221	7.475758343	6.150480429	8.74732634	7.019905241	7.509525112	0	6.78557902	0	0	8.28148789	8.855737157	7.138018371	7.992588865	6.174989941	9.001820217	6.985543273	7.243509337	7.37841609	6.056257117	0	6.015695407	0	6.274019454	0	0	5.871987769	5.888444035
PEBP1	10.21748394	9.942127158	10.54777471	10.42651126	10.37106786	10.49415459	9.896460076	10.52633928	10.29666519	10.35024802	10.33645973	10.2121876	10.34044411	10.29225607	10.33645973	10.32633586	10.31175386	10.30103	10.372912	10.36735592	10.10720997	9.9617295	10.33445375	10.1931246	10.25285303	10.43616265	10.41497335	10.32221929	9.379341783	10.20411998	9.921535617	10.57170883	10.43296929	10.38916608	10.50242712	9.889816946	10.52374647	10.08278537	9.917510761	10.38201704	10.18752072	10.11394335	9.966122952	10.08635983	10.39093511	9.90299226	10.22271647	10.15836249	9.963263525
HBB	9.583629453	10.00860017	9.125936467	9.857217876	10.20139712	9.167524093	8.900345277	8.832738773	8.316871569	9.326806774	8.516905392	8.998838883	8.915668878	8.341236625	8.329255466	8.644054351	8.806498793	9.110589711	8.638429351	9.108395873	8.752317397	8.230883001	9.129141846	9.631443769	8.96694385	9.324940602	8.933502473	10.39093511	8.86071523	0	0	0	0	0	0	0	0	0	0	0	0	7.807656783	0	0	0	0	0	0	0
FABP5	9.268133154	8.347817715	10.13987909	9.133538909	9.305157829	9.56543457	9.312071522	9.178976948	8.979584792	9.030356806	8.745722626	8.9491606	9.229323408	9.029383778	9.227243782	9.019448638	9.176641018	8.840162575	8.930383521	9.065243502	8.493555636	8.81683101	9.213225473	9.113943353	9.15299121	9.621871843	9.034788832	8.463534662	8.948887106	9.225309282	8.286074556	10.161368	9.162205831	9.27198093	9.602689262	9.2887186	9.140696553	8.422540599	8.74814925	9.20776897	9.057399818	8.662398919	8.961411602	8.252246053	8.579257554	7.90225317	8.574667767	8.704725191	8.697647739
CRYAB	9.079976724	9.130333769	8.795101064	8.748722811	9.17759421	8.615413425	8.758071242	9.342521373	9.166814799	9.026369812	8.952894106	8.631159559	9.073608389	9.030559246	9.355891913	9.265006606	9.225335132	9.424424244	9.014772474	9.222170009	8.829014147	8.870491692	8.97913847	8.800586496	8.962108776	8.915816516	9.007619775	9.352182518	8.654070604	9.104282207	9.134368385	8.911573054	8.76981288	9.1750477	8.604182839	8.749759499	9.338017994	8.828356945	8.811722427	8.987925335	8.764975217	8.738653739	8.880922153	8.309949386	9.043126398	8.991518462	9.160618573	9.200193637	8.506951275
DNPH1	8.790383697	8.113909947	9.039176085	8.763360599	8.789340939	8.962639206	8.313993698	8.808535054	8.766055747	8.572267351	8.712809588	8.726531611	8.682469999	8.859348486	8.867243507	8.809721283	8.879972762	8.773391453	8.808467557	8.887245854	8.593706864	8.365263294	8.754287164	8.545220498	8.666789331	8.806505573	8.803573186	8.74732634	7.541629172	8.641325355	7.984531818	8.93769338	8.621602057	8.690621304	8.773559735	8.182756934	8.715994993	8.462562701	8.233960141	8.634326098	8.385087672	8.649850643	8.350538745	8.140162233	8.574262831	8.26580802	8.71772042	8.353396845	7.89892803
MSLN	7.309097639	7.175743713	7.472024712	7.403789489	7.313339865	7.452461155	7.330393499	7.42582758	0	0	0	7.607229786	0	0	0	0	0	0	0	0	8.015820638	7.855779539	7.313403184	7.536621575	7.604085598	7.281328883	7.287488231	7.43344981	7.50291851	7.484954362	7.148139767	7.055072421	6.924408573	7.489311489	7.638758745	7.086110609	7.143358382	8.081815204	7.947615053	6.912981593	7.613080357	7.435860301	7.561017869	0	6.965032326	7.722378872	0	0	0
IST1	0	0	0	0	0	0	0	0	7.766011095	6.654301805	6.748722888	0	6.669902458	6.550803076	7.202951272	6.78067015	7.052309138	0	0	7.105612394	0	0	0	0	0	0	0	0	0	8.970718704	6.449787001	7.900345282	0	8.633508854	8.709490446	8.422704719	0	0	0	0	0	0	0	0	6.986816549	7.788924552	0	0	0
GPC3	7.365132186	8.550534088	0	0	6.772710417	0	8.571289472	0	0	0	0	0	0	0	0	0	0	0	0	0	7.292898197	0	0	0	0	7.426657644	0	0	0	7.429316168	8.368751621	7.891855123	7.957607292	6.401745254	0	8.438194142	0	7.080518297	0	0	7.945941034	0	0	7.25662157	7.4476541	8.26242736	7.423360594	7.220369659	0
CAMP	9.132291716	7.507262033	8.24731028	9.034949147	8.13321946	8.155001839	0	8.227037848	6.828743719	8.842914886	6.836235538	0	7.70223231	8.648311212	8.249516318	8.31718551	7.934195354	8.274527307	7.425044891	6.770461781	9.949336327	10.07188201	9.079181246	7.611479026	9.835811016	8.183924355	8.391852161	6.54699905	10.32633586	9.118000034	7.384353432	8.062732367	8.924305137	7.972452791	7.989787871	0	8.022923016	9.71467337	9.976015072	8.914559986	7.664613783	7.153967252	7.25445142	7.290613307	8.762048042	7.281465196	0	0	7.060433444
OTUB1	9.10720997	9.014184398	9.507518556	9.373077592	9.149680883	9.383815366	8.950048269	9.441883577	9.329499576	9.121034303	9.149003452	9.064944426	9.060697841	9.292411149	9.457154943	9.234719705	9.344235035	8.954854916	9.295039029	9.454189114	8.846077201	8.838559465	9.254257967	9.098193626	9.25265889	9.181529182	9.223859216	8.929929561	8.659117201	9.065505023	8.922881092	9.449971811	9.338376799	9.087568477	9.351390415	8.869296273	9.427502338	8.86145077	8.730951764	9.211681077	9.028449243	8.713045101	8.656079028	8.313318738	8.810279576	8.742245809	8.562376147	8.690293565	8.79965065
DCXR	0	0	0	0	0	0	0	0	0	0	0	0	0	0	0	0	0	0	0	0	0	0	0	0	0	0	0	0	7.549236308	9.729480673	9.329092647	10.1931246	9.957123404	9.842677873	9.984297729	9.285557309	9.856704729	9.463892989	9.0736817	9.950403803	9.70222368	8.855888483	8.846460826	8.574737147	9.084862139	9.230116687	9.225309282	8.687314883	9.093561758
MASP2	8.946678197	9.211894424	8.513896488	9.070518097	8.726417471	7.45020292	8.650783336	8.371788011	9.175076721	8.121953587	8.278593571	7.870023298	8.061377078	8.277334115	8.702895604	8.088525896	8.079470683	8.983865242	8.166133973	8.593407919	8.907943154	8.667733053	8.1092072	8.938349577	8.577376893	8.293804362	7.660220204	8.316892506	8.153936758	8.949502226	9.190331698	8.432953267	9.103187749	8.723931576	7.336799851	8.600646237	8.34773972	8.912540883	8.661500336	8.060697844	8.911056351	8.922050403	8.872989087	9.24012473	8.304856596	9.199919652	7.341612578	0	8.372046234
CLIC1	9.82087767	9.954382426	10.29446623	10.15836249	10.11058971	10.1172713	10.29446623	10.27415785	10.13987909	9.853113894	10.06445799	9.993546444	9.980989078	10.10720997	10.35602586	10.16731733	10.15533604	10.11394335	10.14921911	10.26007139	10.27184161	10.00432137	10.02938378	9.986323777	9.864184644	10.10720997	10.1430148	9.829323074	10.13987909	9.842103516	9.928784904	10.31597035	10.17026172	10.10720997	10.1271048	10.27184161	10.28780173	10.2278867	9.956874066	10.02938378	9.95161433	9.821559379	9.975431809	9.804200788	9.961292923	10.32014629	9.724210311	10.13353891	9.887262744
UPK1A	9.253556067	9.805813383	8.851991749	8.890678055	9.277677963	8.787821647	9.804009875	8.64562856	9.31371962	9.445604203	9.547430086	9.524409105	9.313086476	9.075546962	8.95895548	8.785721236	8.928124334	9.582120204	9.094994901	8.733261482	9.966592226	9.967224943	9.426316029	9.466051626	8.624137652	9.436289894	8.974608397	9.365356928	9.299180311	9.273302279	9.797800558	8.897929344	8.931330717	9.299005817	8.82035255	9.819451803	8.696129134	9.976698375	9.972022231	9.435828446	9.47142374	9.572127788	9.919888368	9.782966837	9.750508395	9.846170044	9.624230514	9.584331224	9.953595411
UPK2	9.140727963	9.757509902	8.818918365	8.9160853	9.29666519	8.785813698	9.77815125	8.711199636	9.384120342	9.43171749	9.557422982	9.505312808	9.267124775	9.021767973	9.06822298	8.737685519	8.926193197	9.580069223	9.058122216	8.868521009	9.972161166	9.906873535	9.367691298	9.42975228	8.602526608	9.465382852	8.987053711	9.3730408	9.20136981	9.10489663	9.721761167	8.839829866	8.913071741	9.274527305	8.802794243	9.742269394	8.708233885	9.926517364	9.872377736	9.343664565	9.395483655	9.507207993	9.786446173	9.736412439	9.80717635	9.77425412	9.560361021	9.561280314	9.92642477
PDXK	9.211467625	9.217194318	9.463086333	9.339093523	9.198657087	9.352163216	9.10397467	9.438906086	9.348519036	9.202842365	9.181843588	9.01703334	9.115743609	9.239399593	9.469586403	9.264558113	9.445604203	9.040879125	9.235528447	9.461093156	8.995784321	8.952312857	9.255730686	9.029951642	9.309672743	9.259808823	9.245364588	9.075583456	8.864190582	9.143982293	9.128011333	9.447406129	9.260667537	9.12113289	9.30440435	9.008429827	9.377233377	8.926069641	8.876448787	9.198464636	8.922621672	8.96694385	8.936624313	8.955928157	8.989267341	8.958673757	8.880121599	8.79237768	8.945690108
ARPC2	8.964297353	9.072396967	9.338456494	9.223002439	9.175250811	9.147150526	9.26653743	9.335197045	9.345941961	9.143857576	9.128205344	9.040879125	9.289990066	9.208360725	9.324858388	9.160438517	9.212666929	9.222326211	9.252683162	9.225180008	9.365712562	9.491739786	9.113943353	9.077948999	9.237518605	9.149465451	9.227012096	9.159837791	9.33421241	8.90733073	9.024854949	9.314625519	9.212214248	9.174379666	9.147892645	9.207122498	9.310735784	9.321536295	9.444466388	9.101024941	9.032981193	9.221309891	9.103940485	8.977307398	9.282961804	9.168025809	8.941501495	9.248610745	9.028937077
VILL	8.164650219	8.149465454	7.619176851	7.488719903	7.72375113	7.111497782	8.33933217	8.044578959	8.276024995	8.186278106	8.029505529	7.987362336	8.163787313	8.243806692	7.764078955	7.756993444	7.706342207	8.476657761	8.037306955	7.607658729	8.752225205	9.160648575	7.946957997	8.702413303	7.785144694	7.937723461	7.807994792	7.847566496	9.258062312	7.99812415	8.078311791	7.809546255	7.799319875	7.648447847	7.663305085	8.291102333	8.048014295	8.683821231	8.965949192	7.885717337	8.588630203	7.79442531	8.42462033	7.853162623	8.17137537	7.930806454	8.957894488	8.10229647	8.185712103
ARPC5	8.440641501	8.403292147	8.710794101	8.605251161	8.738050839	8.558936457	8.722724392	8.720820583	8.739255804	8.554707162	8.574366993	8.492061606	8.777013358	8.654176543	8.857899123	8.552400502	8.600569981	8.717778648	8.615687083	8.625127168	8.909058338	8.945419343	8.591109149	8.47504617	8.737899983	8.506247899	8.69084261	8.602092563	7.782336445	8.478580925	8.442213154	8.754034736	8.621799225	8.566001212	8.603057723	8.623776329	8.710024232	8.675283295	8.898417997	8.588966024	8.536027877	8.556676317	8.364644787	8.090645961	8.4530736	8.422294303	8.247555949	8.592221185	8.208172529
CD5L	7.463863154	7.353781654	0	0	0	0	0	0	0	0	0	0	0	0	0	0	0	0	0	0	7.563386159	7.730838787	7.200084091	7.305566335	7.300769362	0	0	0	0	0	7.1171387	0	0	0	0	6.59760755	6.826029491	7.59924973	7.881761154	0	0	7.852504398	0	0	0	0	0	0	9.147181473
CUBN	7.282893909	9.084540532	7.275011761	7.963688688	8.775064052	8.572395244	8.585472011	8.013805932	7.581676657	8.416007742	8.602775988	8.363179352	8.934331772	7.797468371	7.7464318	8.487011041	8.117702065	9.391799305	7.107549164	7.477526422	8.280692167	8.415240526	7.472756464	8.505733171	7.561995312	6.995893983	8.258469664	9.589424558	6.938664849	7.679673149	8.849898287	7.791459064	8.071440131	8.629368819	8.433593843	8.558528578	7.796428626	8.139406774	8.290502064	7.727394849	8.411266068	7.112638544	8.365993122	7.094610898	8.546740026	8.449817681	9.054881055	8.655205689	6.953363429
PLIN3	9.04273298	8.432263592	9.409933124	9.173186269	8.943073868	9.256549382	8.850241768	9.202515562	9.257942431	8.985192872	9.028652574	8.966653195	8.99790164	9.182585826	9.269396183	9.108497372	9.230882999	8.808156937	9.172778015	9.240374497	8.760362161	8.487604957	9.098262903	8.926548225	9.131811072	9.093841767	9.164352856	8.619009805	8.584568665	8.98271435	8.189686785	9.4954472	9.220108088	8.972022231	9.331791587	8.785037835	9.272143418	8.683101097	8.367896125	9.103085002	8.867926879	7.545542153	7.566673149	7.651684984	8.145600361	8.732071942	7.420351899	8.693551086	8.374913238
CUTA	8.080878914	7.913755595	9.068185862	8.65585846	8.437004967	8.789333885	7.784353363	8.771065427	8.739081608	8.106700736	8.426771436	8.291768326	8.246350839	8.642929235	8.887262745	8.436766741	8.574228104	8.288137397	8.661528741	8.856402595	8.163340309	7.697281673	8.377943382	8.356217136	8.609690435	8.629429989	8.595010953	8.173710606	0	8.536141624	8.447437133	9.60496006	9.1305589	8.839465478	9.284971855	8.294818812	9.281056105	8.614538671	8.214949763	8.819030376	8.795581121	7.724234905	8.286119505	8.101196989	8.602645895	8.487619088	8.082534056	8.417787129	7.793455115
WDR1	0	8.314225473	7.754355989	0	7.986592611	0	0	7.477988991	8.209541825	8.195622946	7.992062841	8.076494809	8.118397015	0	0	0	8.258397806	8.189827066	0	8.091244769	8.124764987	8.372285875	8.050457099	0	8.297716753	0	8.11357572	0	8.308543074	0	8.238322159	7.769421647	0	7.940665877	0	0	7.47876846	8.058388064	8.288718603	8.009238375	0	8.125806461	8.284227642	8.097014235	8.187492522	0	8.08554031	8.274919509	8.508933527
PDCD6	9.460221079	9.913644339	9.507855872	9.646423333	9.616359967	9.662483951	9.540504659	9.683947131	9.60657482	10.12057393	10.04921802	10.06818586	10.0211893	9.584037071	9.73677087	9.490758867	9.724857271	9.743564636	9.613841822	9.82751789	9.858200218	9.788627886	9.733670637	10.10720997	9.485139139	9.787446305	9.695113771	10.06818586	10.2787536	9.430945353	9.867184545	9.46362427	9.617073766	9.608643684	9.648564911	9.461753566	9.573903856	9.82020146	9.77015216	9.731387283	10.12385164	10.04921802	9.78258011	10.04532298	10.24303805	9.572999317	10.2121876	10.06818586	9.975165176
FLNB	9.503218508	9.270166229	9.875460631	9.747792329	9.561983394	9.77050591	9.412309316	9.89936628	9.80140371	9.530045939	9.554210444	9.472624825	9.602049134	9.754401855	10.06445799	9.644320398	9.811501277	9.488733984	9.775937957	9.824438257	9.414154098	9.459392488	9.656098202	9.3995872	9.747248626	9.645009395	9.756826213	9.297388412	9.459573406	9.349704811	9.094610863	9.879697852	9.727663233	9.477743298	9.741175244	9.252586064	9.879863964	9.275196142	9.308030554	9.583380165	9.278433477	8.355432364	9.001906704	8.681503545	8.972711841	9.112638511	8.434728543	9.199041735	9.075072263
GPC4	7.462562714	8.514162429	7.529237818	0	7.620718899	6.960056788	7.867520525	6.705042307	7.233199267	7.791781855	6.757267012	7.077040735	0	6.745777296	7.756255656	7.091139189	0	7.198134547	6.665618603	7.768008777	7.114210562	0	6.759735891	6.842309685	0	7.355221592	0	7.811300141	0	7.552935778	8.426429927	7.582926557	0	7.600689815	6.821952252	7.865571795	6.67843652	7.067108106	0	6.886924859	6.990174564	0	6.973769627	7.083610141	7.1869846	7.740291625	0	0	0
ATRN	8.926897824	8.931315456	8.431009752	8.402123764	8.470072217	8.328807572	8.855082826	8.454219637	8.496140564	8.661235136	8.603588189	8.691938621	8.649587962	8.378397903	8.432953267	8.407169878	8.359399074	8.65410913	8.441914977	8.334875779	8.779531559	8.841040204	8.573984942	8.782845127	8.325761887	8.590250936	8.330636954	8.764661733	8.977650455	8.926270402	8.908168566	8.472493162	8.437020844	8.478234517	8.37027247	8.78373926	8.477960082	8.76550464	8.83628613	8.592099001	8.777695002	8.736460248	8.887403476	8.971549517	8.715234297	8.753942908	8.815757008	8.743525444	8.923730902
FLOT1	9.592132326	9.682695496	9.32782874	9.436448901	9.695446651	9.459302	9.686797089	9.43519116	9.419840142	9.520195218	9.528389574	9.631819048	9.534026106	9.383815366	9.501921515	9.632133222	9.62838893	9.725094521	9.235528447	9.444965524	9.608065823	9.571137936	9.687930075	9.696102904	9.342422681	9.884959538	9.72348851	10.08278537	9.566614238	9.564322753	9.623704028	9.341197032	9.426120709	9.615287063	9.480553063	9.601005548	9.404731115	9.566248884	9.523421275	9.63748973	9.638818597	9.904434217	9.721686984	9.747077607	9.686171343	9.526003086	9.940586206	9.880052911	9.770859373
MYO1D	9.976725869	10.00432137	9.663776285	9.672596548	9.844446109	9.484413738	10.10380372	9.734695842	9.502003545	9.611871941	9.731556534	9.735159593	9.733341738	9.559511632	9.907873359	9.832144719	9.655829681	9.923741255	9.608290638	9.513430699	10.14612804	10.08990511	9.730782276	9.835094196	9.43226359	9.779899382	9.6576963	9.85334528	10.21748394	9.945315915	9.963419465	9.647637212	9.667789051	9.823552473	9.47360374	10.06069784	9.726180942	10.10380372	10.04921802	9.713616529	9.811313546	9.750330938	10.01703334	9.893206753	9.915742703	10.27184161	9.568459877	10.15836249	9.918737849
BPNT1	8.979325253	8.887651053	9.173623258	9.052270597	8.941888916	9.120475217	8.778049904	9.146065989	9.053040009	9.028693229	8.926465926	8.887532909	8.974419574	9.039731296	9.232437009	8.92154082	9.071882008	8.882393604	8.999952225	9.086893472	8.809337461	8.711081394	8.940705701	8.950963301	8.998769205	9.003503615	9.007918391	8.833389383	8.696819274	8.814693651	8.772812945	9.117668941	8.976138972	8.840833494	9.035229557	8.70784259	9.046807214	8.717795283	8.595066125	8.857030799	8.83333839	8.636658372	8.583210114	8.690568174	8.767949492	8.785116196	8.533556002	8.77246107	8.356656754
DDAH2	8.727484324	8.604485257	8.842790159	8.807237279	8.588383769	8.711815663	8.464131712	8.812866585	8.948642769	8.735638815	8.677004363	8.646678138	8.731492066	8.834497001	8.879852511	8.753268906	8.75782859	8.588619005	8.764213506	8.83674175	8.329987389	8.285939682	8.683947132	8.601636349	8.820739888	8.654494203	8.762783563	8.379196706	8.29539115	8.666405649	8.49864132	8.722066008	8.728370018	8.504253322	8.609871758	8.329316507	8.754134195	8.218614272	8.089445862	8.645353485	8.495141771	8.402639615	8.31615913	8.489902258	8.216403448	8.477830025	8.173244562	8.39698351	8.389325594
NAPSA	8.129141849	8.773706013	7.655608995	7.880001394	8.57328944	7.476599803	8.971628338	8.232818295	8.241397044	7.85405694	7.363705992	7.759131262	8.072176348	7.448226956	8.393417251	7.907395241	7.563113096	8.643511895	7.052386134	7.080482215	8.040681443	8.690683281	7.730927562	8.387905691	7.392890338	8.105033054	7.768763866	8.681096449	7.90982872	8.149527017	8.784938082	7.632851936	7.92289147	8.58675604	7.510879998	8.986193783	8.285422276	7.991323564	8.557158184	7.734055381	8.399639117	8.00393421	8.878027476	8.387959021	7.759833985	9.259784946	8.906178754	8.186080089	7.561328029
LDHA	10.01703334	9.643630306	10.13353891	10.13987909	9.954242509	10.06069784	9.892267173	10.24303805	10.01703334	9.968949681	9.904423394	9.825257301	9.929715167	10.1172713	9.980911938	10.04139269	10.22271647	9.846955325	9.877336785	10.12057393	9.870392199	9.833784375	10.04139269	9.838061612	10.14921911	9.971127347	10.01703334	9.834662265	9.774516966	9.949619293	9.601147014	10.1271048	10.13672057	9.920410325	10.05690485	9.840124922	10.29225607	9.805894875	9.769694806	10.0374265	9.806864805	9.597958315	9.697368853	9.534191158	9.749109924	9.945468585	9.57634135	10.12385164	9.864190582
PGK1	10.31386722	10.34830486	10.54900326	10.47567119	10.372912	10.44247977	10.25767857	10.56937391	10.48855072	10.38201704	10.39269695	10.29003461	10.40483372	10.47275645	10.5276299	10.42813479	10.48144263	10.35410844	10.46089784	10.55990663	10.18752072	10.1172713	10.38201704	10.33243846	10.39445168	10.42324587	10.38738983	10.29003461	10.04532298	10.29003461	10.29885308	10.55266822	10.46538285	10.35024802	10.44715803	10.22271647	10.55990663	10.13033377	10.07554696	10.372912	10.27415785	10.17026172	10.07554696	10.16731733	10.26007139	10.26951294	10.17897695	10.2121876	10.07918125
EGF	8.158905024	9.38712276	8.687582465	8.322963164	7.954006001	7.783388986	9.179523067	7.954242514	8.346841772	7.833255519	7.335979162	7.996586096	7.705102183	7.934937579	7.997093556	8.053078447	7.708361412	7.735351353	7.564453018	8.088773771	7.91048567	7.642009222	6.762716141	8.151921183	7.852644659	8.299942902	7.125090746	8.428377803	7.527423672	7.976299535	9.261334254	8.73658771	8.409764106	7.670885697	7.784389039	9.220265034	7.898242369	7.795386385	7.739406197	0	8.04883009	0	8.853807685	8.087071209	7.717012748	9.439222132	7.043126437	0	0
PIGR	8.863376401	8.902535909	9.204119983	8.849050691	8.753376204	8.703978826	9.231036099	9.434568904	8.082964797	8.86382231	8.873628627	8.523681449	8.994330353	8.657772709	8.604550034	8.938709813	8.615192268	9.084862139	7.546345224	6.954329408	9.697996094	9.889240056	8.681657238	9.093841767	9.120277721	8.663408786	8.415424114	8.989133772	9.729253908	8.833102469	8.871777193	9.200084064	8.861832998	8.666620927	8.69311992	9.209434582	9.419096218	9.638708845	9.826113693	8.679418812	9.07155064	9.01703334	9.558072259	8.665177464	8.569186574	9.146964797	8.576870937	8.778223627	9.573126995
AMBP	9.858483058	9.309374625	8.042969077	9.523447299	9.456942685	7.768749073	8.903632517	8.658221335	7.241122962	8.159537119	7.834191739	8.518737611	8.654600038	8.251808501	8.611542758	7.993771196	7.056104136	9.209059034	0	6.718161178	10.43775056	9.561101384	9.248757723	9.534102292	8.979252371	8.491459751	8.608686459	9.501059262	9.662757832	9.866287339	9.304835069	8.247654178	9.51851394	9.465486951	8.017700975	8.931747643	8.751317604	10.38560627	9.56856544	9.292344694	9.530430236	9.330920831	9.274273338	8.606800409	8.581619748	8.994361152	8.794209117	9.134368385	9.974410361
TF	9.395413768	9.036987998	8.631047854	9.689166736	9.08120324	9.143014801	9.269139197	9.673877586	7.890750672	8.229809786	7.276829328	7.115410823	8.728840569	8.705872262	8.247776933	8.728905433	8.730329987	8.67419036	7.443685354	7.272862299	9.977073964	9.360081955	8.773157214	8.725976936	9.645068401	8.906372759	8.817069317	8.871981354	9.07280115	9.339093523	8.948315141	8.584071023	9.720192391	9.028530587	9.163071882	9.191786248	9.68003621	10.01703334	9.305867057	8.724087362	8.674796865	8.345726515	8.811347076	8.637109306	8.150357261	7.507936802	7.244351378	8.242913949	9.137797043
ALDOA	10.41329976	9.88305925	10.20682588	10.25042	10.20951501	10.2278867	9.874435429	10.33645973	10.30103	10.28555731	10.2380461	10.12057393	10.25767857	10.46389299	10.22530928	10.29885308	10.34830486	10.07918125	10.42488164	10.42975228	10.1271048	10.09342169	10.32633586	10.20682588	10.4456042	10.13987909	10.30535137	10.07554696	10.09342169	10.37657696	9.830023783	10.13987909	10.20682588	10.17318627	10.19589965	9.813193887	10.25285303	10.07918125	10.01703334	10.30749604	10.1430148	9.859924481	9.916774945	9.7719988	9.868473978	9.986753825	9.810555094	9.85734456	9.994343553
ANXA1	10.24551267	9.723455672	10.39093511	10.53529412	10.43296929	10.43296929	9.676492416	10.57863921	10.50920252	10.29225607	10.40483372	10.7512791	10.25285303	10.6919651	10.56110138	10.48000694	10.60530505	9.998259338	10.66745295	10.68574174	10.01703334	10.04139269	10.4456042	10.28780173	10.39093511	10.2764618	10.36921586	9.811662124	9.919924925	10.27415785	9.711739761	10.45024911	10.55022835	10.42160393	10.42651126	9.663389931	10.59879051	10.00432137	10.03342376	10.4456042	10.29446623	9.334694959	10.06445799	9.789940125	9.751625477	9.895869871	9.597464817	9.128205344	9.8649499
SEMG1	7.945443969	6.417322363	6.16414488	8.948143894	5.963509695	0	0	0	0	8.665965402	0	0	0	0	0	8.017575873	0	0	8.933816175	0	7.40188284	7.35684777	6.112035287	7.18661738	6.521373612	0	6.865867673	9.881493074	6.964730968	8.25988045	6.979885164	6.735814477	8.790052822	6.653174005	0	0	0	7.579417732	7.691629551	6.013132697	7.353839343	0	0	0	0	0	0	0	0
HSPB1	9.756696951	9.779430533	10.02530587	9.921832083	10.02938378	9.981700847	9.601799337	9.9887863	10.161368	9.973150954	9.99831602	9.963249346	9.961212203	10.18469143	10.03342376	9.992398859	9.996393451	9.699117639	10.13353891	10.09691001	9.698744113	9.726164625	10.04532298	9.912854167	10.13033377	10.06818586	10.08278537	9.791851989	9.755600478	9.75097869	9.716837723	10.00860017	9.850119127	9.977266212	9.922455562	9.540104134	9.823526394	9.627335127	9.701904584	10.02530587	9.865263917	9.343664565	9.557507202	9.572569581	9.668385917	9.617660722	9.539465032	9.477801117	9.519276575
GNAI2	10.17897695	10.5132176	10.10720997	10.08635983	10.34242268	10	10.63748973	10.12057393	10.0211893	10.15836249	10.161368	10.2764618	10.1903317	10.17318627	10.18752072	10.2278867	10.21484385	10.16435286	10.18752072	10.13353891	10.37657696	10.4785665	10.08278537	10.33445375	10.05307844	10.19589965	10.21748394	10.20411998	10.47421626	10.1430148	10.49415459	10.1430148	10.11058971	10.35602586	10.01703334	10.63848926	10.15228834	10.36172784	10.45024911	10.10720997	10.33445375	10.1931246	10.35602586	10.30103	10.29003461	10.28555731	10.15836249	10.52244423	10.35983548
ICAM1	7.683209202	7.043008449	7.083610141	6.981320219	7.187464343	7.216377084	7.175685757	7.306660898	0	7.688126049	7.064532899	7.139564298	6.632528252	0	6.975376702	7.44872179	6.91188709	7.911477222	6.812605968	0	8.75870756	8.999308923	8.114444176	7.887127605	8.475700239	7.398374104	6.828169976	7.979475535	8.311563155	7.72742739	7.040167076	7.177825001	6.995648399	7.30066071	0	7.222430341	7.368249703	8.569139727	8.845333737	8.110252921	7.966831366	0	0	0	7.747209771	6.953382769	6.980957362	7.74664199	8.11932189
CALB1	9.806302102	9.800524627	8.578054411	9.440168892	9.233199242	9.09317645	9.508960433	9.411619706	9.459513109	9.605692828	9.324549948	9.461333422	9.346978534	8.896713564	9.108429709	9.326520192	9.132547843	9.689477571	9.428053762	8.831940126	9.612709703	9.638658948	9.291435455	9.392485909	8.518039907	9.924795996	9.403720909	9.787013907	9.479488932	9.776083437	9.760030235	8.594646644	9.467815216	9.201151228	9.07762223	9.466704544	9.384944498	9.569830206	9.59247655	9.271957713	9.361727836	9.823311175	9.357934847	9.864706825	9.967627527	9.22680605	9.61853967	9.701473	9.636227041
APOA4	8.23827198	9.198986806	7.505394214	8.708964491	8.281533316	8.3206032	8.977330277	8.48638797	8.415857741	7.001863506	6.371031084	9.618236425	8.343073636	7.634567959	7.840507575	7.693366361	8.52667521	9.017367284	0	7.234238826	9.436719078	10.06445799	8.21351776	8.547319258	9.513057708	8.3333465	7.286007145	8.272236243	9.785144686	8.229605062	9.204716728	7.423327825	8.604819832	8.260309948	8.302201013	8.927719302	8.41507356	9.425469006	10.05307844	8.219636913	8.525899592	6.887752349	9.219165222	8.307389058	8.354281356	8.375645329	7.825679227	7.709286934	8.806803825
LDHB	10.00860017	9.834770288	9.760528028	9.790988475	10.05690485	9.821434916	9.791452037	10.14921911	9.936513743	10.03342376	9.914216183	9.771587481	9.989160488	9.967964288	9.932965619	10.10037055	9.898845802	10.09342169	9.920399892	9.910272131	9.960489804	9.902541344	9.834573284	9.853832007	9.93010814	10.03342376	10.06069784	10.1172713	9.732168512	9.979575688	9.806179974	9.770645857	9.823193738	10.04532298	9.855470696	9.769030047	10.13672057	9.928416337	9.872634025	9.828015064	9.839490617	10.09691001	9.931040666	10.00432137	10.02938378	9.927909047	10.20951501	10.08278537	9.804139432
KLK3	9.477425155	9.169556883	10.6919651	10.17026172	9.938339566	10.55870857	9.691488176	10.56584782	10.28103337	9.951473518	10.00860017	9.787757932	10.0211893	10.22530928	10.42160393	10.2380461	10.30103	9.733566379	10.20139712	10.52244423	9.320146286	8.393329474	9.882285411	9.502167558	10.04921802	9.937402533	10.20411998	9.571999817	0	9.451740395	9.088915347	10.68033551	10.16731733	9.906060153	10.5301997	9.610500467	10.5289167	9.195899653	7.884223106	9.858158077	9.467223211	6.489311616	0	6.309460035	6.511308509	9.13145826	0	6.497965877	8.998237536
ANXA5	10.52633928	10.33041377	10.78247262	10.60745502	10.48000694	10.72835378	10.12385164	10.69983773	10.43296929	10.48713838	10.44090908	10.35218252	10.4440448	10.57403127	10.5965971	10.48287358	10.56466606	10.35983548	10.54032947	10.52244423	10.32633586	10.12057393	10.63144377	10.54900326	10.65417654	10.46538285	10.50105926	10.23299611	9.909213593	10.50379068	10.29666519	10.7512791	10.60959441	10.44090908	10.72263392	10.10037055	10.62013605	10.29446623	10.06069784	10.64048144	10.5276299	10.30963017	10.20411998	10.05307844	10.05690485	10.161368	10.03342376	9.995033785	10.16731733
ANXA4	0	0	0	7.158995407	6.850321526	7.610894289	0	7.049373139	7.080193456	0	6.958821851	6.875408618	6.762536101	0	0	6.82331124	7.078348086	0	0	7.091385577	7.060999891	6.623249394	0	0	0	7.06874233	7.064495464	6.982872541	0	0	0	0	7.132355794	6.813040353	7.620531645	0	7.027064103	7.011570486	6.769473407	0	0	0	0	0	7.000390733	0	0	6.86081104	0
PIP	8.365544142	6.932991008	8.408884145	8.737987327	7.143077315	0	0	7.49126363	0	7.822612618	7.372617485	6.589245787	8.135895579	7.340820756	7.292278251	8.16408506	0	7.628378721	8.753590719	0	8.30775269	8.149249916	6.524279386	7.598724876	7.531172261	6.730362389	0	8.241845207	7.443075159	8.180441301	6.793126636	8.303757471	8.707978732	7.050418466	0	0	7.676583888	8.029018334	7.979957898	6.466808475	7.542152945	0	0	0	0	0	0	0	7.678336256
ANXA3	10.09342169	9.509995092	10.31806333	10.30963017	10.02530587	10.26717173	9.570974685	10.33243846	10.16435286	10.02530587	9.994928343	9.865246149	10	10.13672057	10.28330123	10.10037055	10.29003461	9.736165348	10.04139269	10.28555731	9.782938202	9.7612887	10.27415785	9.99870387	10.36361198	10.05307844	10.1271048	9.610841082	9.389201536	10.04139269	9.445105802	10.31386722	10.3283796	9.974856965	10.33243846	9.519473591	10.35218252	9.721917734	9.644881521	10.24054925	9.958205407	9.274342616	9.253265294	9.02901833	9.316222038	9.156791368	8.82603591	9.314835923	9.570087392
ACE	9.925162487	9.645972159	9.544464932	9.750508395	10.2380461	9.868374022	9.574667766	9.864208393	9.814194305	10.00860017	10.09342169	10.15836249	10.20139712	9.461408477	9.63064141	9.808629531	9.800717078	10.22010809	9.769377326	9.791753789	9.727142564	9.632457292	9.841791047	10.18184359	9.209193196	10.00860017	9.865192839	10.4345689	9.578111778	9.893206753	9.621176282	9.554937155	9.76404904	10.22010809	9.858200218	9.551791444	9.857935265	9.694016968	9.579486346	9.848872362	10.16731733	9.612857998	10.23299611	9.800084417	10.36548798	9.972762708	10.72345567	10.02938378	9.240324555
SRC	9.697499603	9.806830928	9.932230167	9.713196434	9.554319528	9.777027871	9.916374979	9.764952832	9.661159333	9.64450752	9.662653966	9.764176132	9.592543143	9.634648536	9.780317312	9.658440707	9.677214451	9.6542632	9.59407196	9.662974925	9.690515036	9.844147758	9.659564441	9.691152247	9.555964585	9.626340367	9.59508819	9.678172262	9.892734437	9.690426461	9.775523071	9.951735682	9.720423936	9.541029789	9.787361277	9.873756422	9.767467555	9.649714457	9.805222113	9.655128827	9.646883832	9.762115642	9.758540995	9.792699789	9.727687624	9.64475361	9.710515075	9.823272033	9.823585071
PLS3	9.34795417	9.390493527	8.327420244	8.770012055	9.135387109	8.585753921	9.677552206	8.918381617	9.036828434	9.196563035	8.90299226	8.924899265	9.227192307	8.814154333	8.578765241	9.048946504	8.758995112	9.403189179	8.934134704	8.354818873	9.552972238	9.565847819	9.033865868	9.352182518	8.734359714	9.122379732	9.040246215	9.289388257	9.462323113	9.307752688	9.342304221	8.193625421	8.75852585	9.10967977	8.587744631	9.613366057	8.930210154	9.498641319	9.523186985	9.032135047	9.29939833	9.586801024	9.163727736	9.347251933	9.445526366	9.41013586	9.280441779	9.485721427	9.274988682
NID1	7.790967399	7.573869112	7.578593383	7.547540899	7.074597081	7.088879991	7.414204317	7.265077402	7.441365182	0	0	0	0	7.267406442	7.072323475	0	0	7.592554252	0	0	7.772600395	0	7.249882926	7.574378576	0	7.309268126	0	0	0	7.825562428	7.613577583	7.645127409	7.615497656	7.098401457	7.137733826	7.428442596	7.301811045	7.811199534	0	7.292211775	7.611266485	7.220500372	7.337778645	7.985341138	0	8.116308818	0	0	0
CBR1	9.683047038	9.792139445	10.06445799	9.997591686	9.795087141	9.976808337	9.729553536	10.17897695	9.862286457	9.627365857	9.780057954	9.700582582	9.645932904	9.95671096	10.14921911	9.873570525	9.992527009	9.719861399	9.946142646	10.04532298	9.535116821	9.345059906	9.919371012	9.722707944	9.740252128	9.92703142	9.858994109	9.587733409	8.99751744	9.659079116	9.739959793	10.06069784	9.977467525	9.768534509	9.960599192	9.662956051	10.1430148	9.487138376	9.304382803	9.896548262	9.688393123	9.474216264	9.426543792	9.411922597	9.518421807	9.476324318	9.501401631	9.511883361	9.326007968
BPI	0	0	0	7.878676879	0	0	0	8.037187375	0	6.646423431	0	0	0	6.765981387	7.082749513	6.842378366	6.708624911	6.846566015	0	0	6.953590627	8.419625363	6.625538904	0	8.102605198	6.53607856	7.480323216	0	7.410169656	0	0	0	7.694956011	0	0	0	7.876967973	6.70064324	8.334192294	6.39387358	0	0	0	0	6.755326003	6.626791984	0	0	0
ARF4	9.201397125	9.128786859	9.567026366	9.420863021	9.131233595	9.408375661	9.404987573	9.51054501	9.286074554	9.194653072	9.23560419	9.183895916	9.160588569	9.325802909	9.667882365	9.396513182	9.399102361	9.060357825	9.311753861	9.647539445	9.086110574	8.934351979	9.157124196	8.77410072	9.198272099	9.333870279	9.134017646	9.133251413	9.106768666	9.265596023	9.200741091	9.603696366	9.378343384	9.179580514	9.474842479	9.437750563	9.386944625	9.128560807	8.969839749	9.127169614	8.847831679	8.932996025	9.051576959	8.824138857	9.342639774	9.124080157	8.917642026	9.454707693	9.196120893
PGAM1	9.735311404	9.634366415	9.951696853	9.787425049	9.66763037	9.836311454	9.650200637	9.870561908	9.862971713	9.593330381	9.66397404	9.558396534	9.610500467	9.795880017	9.795442028	9.705007959	9.810608833	9.612391756	9.749140878	9.937502847	9.536331136	9.462622575	9.732257016	9.565387317	9.677917052	9.755760553	9.758124304	9.646403726	9.35606412	9.612285721	9.591020062	9.960765598	9.771719733	9.649071865	9.839672839	9.608526034	9.887150126	9.495544338	9.433321712	9.723587008	9.534584489	9.41584107	9.328379604	9.37892455	9.554089207	9.632031901	9.362048718	9.528479616	9.318209467
GSTM3	9.836495014	9.772307034	9.679618654	9.516865762	9.621996303	9.549701987	9.597333123	9.674190359	9.696740705	9.916569745	9.501059262	9.601386313	9.646472345	9.411703864	9.767993951	9.823272033	9.757509902	9.577043487	9.577503289	9.681530671	9.223937021	9.254620575	9.617786395	9.573266236	9.465650485	9.739785879	9.322880573	9.67327901	9.371326514	9.758518277	9.67029225	9.614897216	9.455666955	9.547614738	9.495599835	9.492886051	9.61757692	9.149188311	9.174292455	9.547097515	9.481442629	9.838893147	9.666218364	9.648223358	9.896245048	9.559906625	9.27959851	9.673546169	9.558708571
PPIB	7.547146813	7.935890007	8.300638957	8.215135048	8.023663922	7.810870724	8.277861241	8.149865456	7.72432504	7.998172126	7.725290776	0	7.600384742	7.630448226	8.370068763	7.592676308	7.632588887	7.673361948	7.940327192	7.801259614	7.696234044	7.49482224	7.734007307	7.654224697	8.424277124	8.053654562	7.947271939	7.361293343	0	7.204906456	7.602266243	8.136117846	8.004965891	7.785379676	7.590317881	8.102708058	7.964575456	7.478552081	7.247506849	7.435780698	7.42209718	0	0	0	6.97526178	7.752248262	0	7.277769633	0
S100P	8.957065878	9.303196058	8.03286042	8.995819402	8.759803777	8.64542227	8.80685803	8.899825973	8.957487565	9.320146286	9.125025587	9.15347949	8.989480965	8.820359118	8.391252769	8.357763383	8.718285734	9.210799911	8.736945996	8.375096377	9.907153287	10.24797327	9.16589691	9.468568853	8.949590029	8.881424604	8.885479957	9.232996111	10.34044411	8.966038429	9.260881951	7.644556759	9.003115718	8.796081484	8.679673141	8.803518569	8.821742734	9.818470033	10.20951501	9.11247094	9.355202405	9.401400541	10.07188201	9.55031398	9.294466226	9.37816161	9.09039915	9.384586362	9.485721427
DPP4	10.7176705	10.77085201	11.07554696	10.85247999	11.19865709	11.17609126	10.68394713	11.22271647	11.0374265	11.13987909	11.35410844	11.33243846	11.35218252	11.16435286	11.22271647	11.26245109	11.19589965	11.14612804	11.1931246	10.95472479	11.04139269	10.80482068	10.79518459	11.06445799	11.01283722	11.08635983	11.17026172	11.16435286	9.95116746	10.77158748	10.78816837	11.05307844	10.83122969	11.18752072	11.17318627	10.65417654	11.1903317	10.99956549	10.77959649	10.80345712	11.04139269	10.83947805	10.91434316	10.65321251	11.17026172	10.50785587	11.35602586	10.6364879	10.57634135
CALR	8.208011152	7.235275902	8.033986369	8.343782657	8.00069432	7.690355596	6.979389059	8.082030985	7.919496493	8.179695386	7.847967299	7.667611708	7.654311345	8.196120895	8.517631295	7.897791987	8.031085152	7.932077854	8.458184437	7.773779141	8.098262906	8.21945354	7.982221472	7.959279955	8.827705205	7.884965204	8.227218047	7.338556111	7.395710726	8.03854069	7.366535037	7.841709775	8.302763711	7.919187965	7.566166354	7.198822005	7.80862279	7.932554939	8.060093188	7.783989294	7.781432233	0	7.282961826	0	7.465516704	7.470439909	0	7.562934919	0
GSTM2	8.494098913	8.443716609	8.642682109	8.443216036	8.629154658	8.558276462	8.245216459	8.953600245	8.693893954	8.429558501	8.551169325	8.55014271	8.406437983	8.671330235	8.890571906	8.826858419	8.862953851	8.437623745	8.636818758	9.108632666	8.159266334	7.830158658	8.674061598	8.453792137	8.457397397	8.814913182	8.586778533	8.314541331	7.610904928	8.41959231	8.436528384	8.755829139	8.571172911	8.645608918	8.618487402	8.311753863	9.011739562	8.149157509	7.838981254	8.664764163	8.456942686	8.299485509	7.955490522	8.170906812	8.275748887	8.578054411	7.88727964	8.297957378	7.877215807
TKT	9.29808857	9.128689994	9.378307035	9.308543072	9.184691431	9.387372027	9.123851641	9.455742997	9.309438525	9.296972159	9.254934589	9.086039332	9.20723031	9.335297393	9.405295123	9.164739385	9.227655362	9.316536448	9.312367795	9.431315507	9.21285319	9.376339673	9.250249179	9.198629599	9.424751002	9.179149481	9.337279516	9.093421686	9.453150095	9.214949761	9.05018635	9.358581997	9.317603742	9.145351817	9.39555353	9.066624051	9.478508778	9.146128036	9.2878465	9.197804153	9.130140706	8.908747661	9.070111783	8.909133296	8.944146952	9.021313366	9.060131	9.103221993	8.940959519
GNA11	9.913114181	10.37657696	9.710227406	9.801307647	9.86642322	9.633468456	10.6009729	9.745355899	9.729351108	9.947271934	9.901997449	10.01703334	9.933598631	9.748319846	9.776563176	9.949233828	9.844066919	9.992482823	9.817889152	9.681584918	10.17318627	10.2278867	9.795852222	10.08990511	9.593662588	9.938754821	9.813367458	10.09342169	10.26951294	9.933593571	10.36548798	9.731516243	9.853503526	9.886383548	9.671330234	10.59439255	9.770115295	10.15836249	10.22010809	9.817413307	10.07188201	10.16435286	10.33243846	10.08278537	10.32428246	10.42975228	10.04532298	10.68124124	10.53529412
PRDX6	10.29446623	10.07918125	10.64443859	10.51054501	10.4456042	10.49831055	10.1430148	10.61909333	10.55022835	10.13987909	10.36735592	10.1903317	10.26481782	10.49276039	10.64048144	10.35602586	10.48000694	9.992867086	10.51188336	10.69897	9.839006415	9.591265005	10.41161971	10.18184359	10.09691001	10.39794001	10.48855072	10.02938378	9.46170857	10.29446623	10.0374265	10.63748973	10.50785587	10.41161971	10.49136169	10.09342169	10.61909333	9.797426822	9.552400501	10.38738983	10.13353891	9.707195329	9.657189756	9.705923552	9.717969913	9.929587501	9.605660526	9.675567557	9.858946036
BLVRB	9.418019406	9.322777315	9.8680799	9.293627692	9.469483282	9.629939401	9.06160325	9.828008611	9.692397417	9.380663397	9.442213153	9.398998397	9.368565786	9.611479015	9.786744326	9.721868298	9.855373761	9.240549249	9.697081064	10.0211893	9.046182891	8.768401284	9.534026106	9.355279071	9.504049277	9.56769671	9.5930866	9.243980066	8.646805484	9.454143327	9.287152041	9.857627957	9.292256072	9.453669915	9.61558185	9.019573203	9.803149723	8.991943399	8.69304068	9.522652854	9.337978108	9.051384085	8.678154039	8.815664068	9.015066214	9.10768472	8.962113515	8.905968485	9.065318238
PRDX5	9.146221089	9.319751294	9.933699828	9.663653819	9.521425774	9.68730596	9.388385426	9.813374132	9.782816484	9.411586039	9.569280251	9.449709756	9.487265675	9.701990849	9.940944592	9.653675514	9.765206452	9.338954253	9.707927683	9.889783362	9.141073327	9.134878046	9.568811655	9.459648767	9.59445885	9.651743081	9.619750539	9.192149125	8.987384687	9.03802374	9.213411495	9.898725182	9.651365252	9.441160774	9.679255235	9.274919507	9.835633507	9.048014291	9.021850578	9.503545558	9.3602904	8.939813675	8.983468416	9.052655473	9.059487685	9.239499684	8.975914091	9.152441238	9.117569564
PRDX2	10.0211893	9.603772075	10.07554696	10.24551267	10.01703334	10.2787536	9.680743323	10.23552845	10.09691001	9.896829236	10.00432137	9.849830785	9.941208215	10.17609126	10.24797327	10.08635983	10.17318627	9.778975627	10.1931246	10.23552845	9.711562606	9.410625415	10.161368	9.980262507	10.17026172	10.15836249	10.29666519	9.817538928	9.49923331	10.00432137	9.532563298	10.17318627	10.23552845	9.982646555	10.25767857	9.700902651	10.17897695	9.697168293	9.330677517	10.1172713	9.893589785	9.671172843	9.40090047	8.864244015	9.474332838	9.482101454	9.546493309	9.521138084	9.702637294
COPB2	8.699325981	8.344156396	9.152685756	9.013721778	8.782737707	8.967894151	8.360858379	9.17768076	9.009960532	8.610596293	8.815491413	8.739224137	8.707433906	9.113943353	9.255272505	8.704236338	9.048752458	8.443654069	9.027064063	9.057057209	8.335337527	7.906981159	9.025838165	8.531389496	9.107379583	8.798988836	9.024813933	8.342758144	7.375279455	8.607562244	8.108395876	9.14866434	8.998673378	8.709685396	9.035629828	8.102399403	9.177449921	8.164055295	7.742308708	9.005223425	8.325905452	0	7.443575895	0	7.123263509	7.912009381	0	7.293384678	7.269209322
PGM1	9.373996384	9.17248617	9.725911632	9.525472409	9.41594108	9.516244425	9.056790549	9.668385917	9.502399805	9.434568904	9.333568175	9.31255815	9.367001631	9.60109261	9.636247112	9.362331652	9.482644948	9.243831462	9.485139139	9.539189051	9.154910646	9.074121306	9.372064671	9.275794915	9.566189927	9.307838204	9.539101202	9.312283166	8.951750243	9.296730988	9.065766388	9.675778342	9.472741827	9.348460636	9.481112841	8.974456424	9.611787014	9.060131	8.980798471	9.30864977	9.180383966	9.019199401	8.886806461	9.0120776	9.005266333	9.010045413	9.07685881	9.113809703	9.015611205
CAPG	9.474216264	9.657256692	9.348363285	9.144418519	9.230448922	9.001560653	9.599741194	9.334614571	9.318334684	9.361727836	9.356274501	9.313867221	9.43860563	9.328848307	9.401021229	9.419493136	9.25437887	9.223988883	9.447592109	9.543310471	9.457442841	9.581471774	9.258948408	9.615202801	9.264676182	9.371898695	9.223340159	9.33262022	9.554052829	9.47749748	9.633276516	9.375499008	9.175627765	9.20333211	8.989810097	9.564405646	9.342165977	9.432841067	9.581198461	9.266137582	9.593352536	9.51444149	9.51552945	9.614897216	9.747916508	9.496984969	9.155457502	9.588786951	9.50714045
AQP2	10.4456042	10.63144377	9.065430319	9.920895183	10.35218252	9.167228694	10.97954837	9.420797101	10.13033377	9.443638431	9.942979785	10.71683772	10.12057393	8.763390554	9.419427008	9.161368003	9.477714385	9.50778843	9.184634657	9.176814481	10.40312052	10.4345689	9.809128573	10.30319606	9.065280871	9.811025088	9.602981888	10.81023252	10.68214508	10.45024911	10.60205999	9.072543986	9.943825799	10.36548798	9.185966893	10.95424251	9.432873127	10.3783979	10.41329976	9.817340562	10.29003461	10.5289167	10.12057393	10.46834733	10.59879051	10.39794001	10.04921802	10.16435286	10.7355989
RAB10	9.798339831	9.882570071	9.73521553	9.830588669	9.809364407	9.874754254	9.844365326	9.818733813	9.719372725	9.773449992	9.691081492	9.738455509	9.754508873	9.683047038	9.685741739	9.690151762	9.736707171	9.887808528	9.651287708	9.742316561	9.786666258	9.956969982	9.803204387	9.805398899	9.734215579	9.8032932	9.726930864	9.893728482	10.02938378	9.817016371	9.865382355	9.84038842	9.901174875	9.859594577	9.944156829	9.827369273	9.873384549	9.768867396	9.941476648	9.828015064	9.80072395	9.846615417	9.874522404	9.72214836	9.762415958	9.84933955	9.883025139	9.788083485	9.796636767
RRAS2	9.593485442	9.723824953	9.466793502	9.447762521	9.568506797	9.403738051	9.632406672	9.413299764	9.415924413	9.493220972	9.615802808	9.655484195	9.534559123	9.432038809	9.348460636	9.521987528	9.496929648	9.611468391	9.497731108	9.51851394	9.562292865	9.531248936	9.393101169	9.589458091	9.216377058	9.484000714	9.420417869	9.69373574	9.634013507	9.331245037	9.460807669	9.205285584	9.155669982	9.329255465	9.108869329	9.36361198	9.04987672	9.287667391	9.260619875	9.150418695	9.346313847	9.192706807	9.354070004	9.379794843	9.531478917	9.307175012	9.426478729	9.32876683	9.252950069
RAB1A	10.12385164	9.886225555	9.989894564	9.86341209	9.902062752	9.731161512	9.722633923	9.889049458	9.979562032	9.977009862	9.939144699	9.894869657	9.992602114	10.01703334	9.81563751	9.900683857	9.765422658	9.881994865	10.00432137	9.833230009	9.807988027	9.778534708	10.00432137	10.00432137	10.10037055	9.744488567	9.818225894	9.883672789	10.10037055	10.06818586	9.821585577	9.942504106	9.817241346	9.85712133	9.738257188	9.697229343	9.647949922	9.755577605	9.722518754	9.988402868	9.94719347	9.994923949	9.877267656	9.752540114	9.687279192	9.714489028	9.883973561	9.639197528	9.847751522
TPM4	8.907077988	8.287152043	8.497813935	8.543534156	8.407764697	8.57428598	8.295083061	8.513657002	8.468760749	8.585483291	8.40667641	8.347681215	8.527977714	8.648291691	8.486033554	8.445915416	8.470660353	8.57262768	8.513829978	8.438953509	8.716512507	8.880104428	8.477381755	8.687341649	9.026655814	8.454478986	8.541566765	8.458108822	8.875622589	8.748412872	7.949819214	8.67624537	8.480423782	8.301680951	8.509202524	8.224299929	8.525304011	8.613418946	8.765966426	8.461438497	8.578146196	8.512230659	8.417554726	8.193597613	8.383492219	8.273348571	8.021272018	8.306446476	8.151277897
BASP1	10.41830129	9.939064753	10.07188201	10.33445375	10.25285303	10.35793485	9.807507968	10.25042	10.21748394	10.40140054	10.3783979	10.35983548	10.3783979	10.55266822	9.921473177	10.57054294	10.32633586	10.08635983	10.59439255	10.35218252	10.24551267	10.30103	10.41497335	10.5276299	10.42324587	10.07554696	10.39269695	10.13033377	10.27184161	10.38201704	9.889956853	10.02938378	10.34044411	10.2278867	10.34044411	9.754248926	10.10720997	10.1903317	10.25767857	10.38560627	10.46389299	10.02530587	10.14921911	9.791136026	9.868644438	9.706794566	9.743705702	9.588069923	10.15836249
SEMG2	8.074889552	7.298022999	6.691108115	8.640024045	6.876189021	0	0	0	0	9.594491996	5.961957579	0	7.344686963	7.221440347	6.304210602	8.94236031	4.905790485	0	10.14921911	5.320522235	7.577997045	7.656529416	5.499454755	7.30745327	7.260905791	0	0	9.805324114	7.685893948	6.963580119	6.64682517	5.721423946	8.109240972	0	0	0	0	6.379305699	6.2577268	0	6.12652135	5.942618614	0	0	0	0	0	5.23103865	6.050573463
DSG1	8.920947287	6.579360639	7.388118989	6.671052539	8.578604833	0	6.550876375	0	6.195346335	7.202079468	0	7.778961185	6.919616754	6.650482469	7.526054838	0	0	7.742308708	0	7.69940409	6.851282876	7.510437777	6.888297518	7.791318645	6.524993078	0	6.45190934	6.823676396	7.298022999	8.717462459	7.02632898	6.40055543	6.823917492	8.612253907	0	6.606263208	0	6.947276887	7.64563839	6.90404444	7.800297706	8.35437739	0	0	0	0	6.763008547	7.865109905	7.070518134
FKBP4	9.181357592	9.019365575	9.544390543	9.428232013	9.230423374	9.457654854	9.023170122	9.536558443	9.512110471	9.322653372	9.410355384	9.268531171	9.325002252	9.450818554	9.647519888	9.31991765	9.468539323	9.105918741	9.477858929	9.512724409	8.933699828	8.802657443	9.35875314	9.14148113	9.456396402	9.299136694	9.427340022	8.977462951	8.371271103	9.043205039	8.875188638	9.463056428	9.372193719	9.179379418	9.407203888	8.878084984	9.523746467	8.812966806	8.520050989	9.275587741	9.025264893	8.325392502	8.507289032	8.482759282	8.513364118	8.673325084	8.219898742	8.442260216	8.683263232
PRDX1	10.43775056	9.961606164	10.57518784	10.47275645	10.34242268	10.51587384	10.01703334	10.49415459	10.5171959	10.29446623	10.28555731	10.20682588	10.30749604	10.47129171	10.40993312	10.33243846	10.50379068	10.24054925	10.49968708	10.55870857	10.06445799	10.06069784	10.41497335	10.26245109	10.52504481	10.42160393	10.46982202	10.19865709	9.946393307	10.39794001	9.910192029	10.55990663	10.46538285	10.31386722	10.50242712	9.992615366	10.4785665	10.00860017	10.00432137	10.38021124	10.20682588	9.880007113	9.894869657	9.807562086	9.987044761	9.862703698	10.05690485	10.03342376	9.923622177
DSC1	8.857404873	8.322198616	7.121625525	7.931584993	8.413685262	8.007705119	8.201670182	7.576744366	7.18534383	7.851570201	0	7.303886943	8.316997173	8.223469984	7.185712128	8.113040421	7.857796708	7.769879289	8.29673099	7.620448395	7.916548699	8.012077604	8.49883415	8.327522405	7.292699025	7.831831402	8.077040702	0	8.142045151	8.497385834	7.969560347	7.082749513	7.744832589	8.116972826	7.685015825	7.881692725	0	7.388775948	7.562364261	8.16118826	7.916016807	7.775042188	7.95523543	7.974971999	7.897802978	7.86124758	7.910421621	7.268414168	7.285444805
PTPRJ	10.07188201	10.45178644	9.594977846	9.694157513	9.907631677	9.74856012	10.60205999	9.656826209	9.732409845	10.0374265	10.06445799	10.22010809	9.955731033	9.7030247	9.769938297	9.86168373	9.74036269	10.12057393	9.792118418	9.662257161	10.04139269	10.08278537	9.92193086	10.11394335	9.696216553	10.07554696	9.787169903	10.18752072	10.17609126	10.07188201	10.43296929	9.591476435	9.720233748	9.911130964	9.761920325	10.58433122	9.656988886	10.02530587	10.06818586	9.915442049	10.12057393	10.20682588	10.13987909	10.38738983	10.28103337	10.07188201	10.38021124	10.43775056	10.44090908
COTL1	9.06792595	8.941576026	8.83003663	8.705932101	9.081563321	9.037705314	8.766174813	8.865169144	8.812184468	9.074779883	8.743533283	8.692185726	8.989930124	8.733036684	8.395867833	8.890594255	8.585415607	9.046456143	8.954030136	8.553555364	8.969411253	8.955278754	8.745738225	8.782436791	9.00492295	8.725446068	8.857501357	9.116640946	8.702671745	9.021561392	8.859870515	8.820608626	8.652835963	9.041747872	9.021478733	8.672402682	8.75951676	8.918512619	8.846701965	8.684558131	8.659364668	9.265100966	8.785586065	8.62285618	8.685302746	8.686886409	9.191283301	8.642553547	8.458199558
CLCA4	7.480553077	8.038620166	7.665852936	7.778520251	7.255658397	7.764631872	8.498076111	8.094925105	7.764758795	7.66168021	8.486784573	8.673665877	7.681132659	7.721192117	8.293274142	8.116375265	0	7.818397472	7.346704982	7.978750986	8.476106718	8.15038798	8.061866976	7.981460703	7.884240114	7.885604317	8.133602774	8.171638711	8.348032128	7.516112124	8.105612363	7.776657614	7.811038515	7.318021595	7.910731103	8.464951319	8.121395684	8.479949418	8.273510548	8.131714882	8.039969031	7.787637564	8.044029914	7.603599017	8.056561856	8.550851823	8.30089969	7.5906524	8.471922155
PCBP1	9.368955946	9.26245109	9.565788807	9.453303048	9.363405124	9.478220076	9.484556069	9.543385045	9.575730374	9.416773604	9.405670722	9.393943539	9.37888825	9.527062499	9.712515016	9.44870632	9.568612349	9.342462161	9.519355392	9.640839061	9.245512668	9.201588281	9.414555556	9.228015175	9.431428099	9.400934976	9.435175216	9.264747009	9.260929584	9.313867221	9.202379321	9.569245124	9.456107809	9.340007618	9.483986465	9.451863159	9.549076865	9.18774627	9.14188855	9.405226798	9.199837422	9.098193626	9.127881944	9.111699278	9.286636079	9.271841607	9.136720567	9.304318155	9.251370506
ADIRF	9.008003672	8.350422479	8.698100546	8.521321183	8.734807828	8.983905806	8.356389213	8.779170646	9.021230659	8.929050897	9.061942292	8.798049537	8.794223068	9.209702632	8.788966909	9.194458838	8.903952291	8.474973434	8.967866093	9.379939723	8.777281792	8.709465011	8.700444102	8.954739252	9.167317335	8.884846322	9.005094676	8.81623467	9.368974516	8.831344979	8.187830823	8.576410464	8.410709767	8.589614542	8.863768825	8.223158345	8.680462429	8.646521353	8.518592897	8.662446162	8.789319776	8.840595342	8.933026429	8.869243458	8.767541735	8.295501128	8.793971885	8.679582326	8.840933729
PRSS8	9.357934847	9.466600736	9.821854018	9.432969291	9.704965127	9.527049595	9.546555001	9.634225286	9.467874372	9.304468985	9.616853454	9.44379477	9.646403726	9.569876978	9.778794977	9.862912169	9.945463661	9.346333411	9.523772472	9.916985305	9.430671559	9.403017514	9.45331834	9.636307321	9.364982262	9.529468854	9.312367795	9.381259521	9.417405257	9.399223622	9.44870632	9.784524576	9.411636539	9.692344503	9.511722977	9.537100972	9.585404324	9.420252883	9.392397943	9.451402614	9.681612039	9.111900713	9.149249913	9.349937697	9.288629235	9.176727758	9.327297618	9.022675762	9.38583855
PTPRO	9.72584632	9.551449998	8.828653454	9.066921972	9.574031268	8.808069112	9.599162288	9.404816618	8.775654131	9.391675953	9.169850702	9.303735889	9.266278747	8.837323236	8.940636	9.374234952	8.821343184	9.80280792	8.863721277	8.845476332	9.511736344	9.281964623	9.433209609	9.643452677	9.065318238	9.330636952	8.775843369	9.693471924	9.073571729	9.691938621	9.534305387	8.925894543	9.17301135	9.606381365	8.885643872	9.609263494	9.470425193	9.521151165	9.245487992	9.471174318	9.605272715	9.24355889	9.315256425	9.738780559	9.313867221	9.949390007	9.357934847	9.010130278	9.118727551
VMO1	0	7.764646806	0	7.55227877	0	0	7.429235356	7.224817863	7.373482119	0	0	0	0	0	0	0	0	0	0	0	0	0	0	0	7.086003741	7.542140481	0	0	0	0	7.731395352	0	7.57727346	0	0	7.402140984	7.244004853	0	0	0	0	0	7.948241762	0	7.263588755	7.947512148	0	0	7.646011419
DDC	8.879766596	9.346352975	7.894532054	8.061942296	9.230678781	8.590217465	8.644054351	8.645795485	8.771256675	9.023499382	8.875113376	8.970351527	9.083932402	8.438842851	8.34832434	9.057856209	8.65977363	9.1389024	8.720820583	8.469556943	9.134049543	9.000737674	8.631798772	8.852760487	8.387816793	8.778982852	8.91664868	9.356025857	8.453975403	8.81623467	9.320146286	7.804330296	8.03374534	9.224817838	8.55991859	8.595231597	8.663550169	9.109780968	8.962525597	8.586733546	8.789538409	9.198492134	9.124243309	8.652304373	9.073645046	8.851912357	9.462757266	8.946417874	7.743729216
VPS28	10.06069784	10.31597035	9.859996427	9.886242486	9.950150576	9.877423182	10.21748394	9.851649649	9.91658027	10.07554696	10.11058971	10.25042	10.13987909	9.833580552	9.883269542	9.926460781	9.996761145	10.09691001	9.832464204	9.814247596	9.941511433	9.949072709	9.855622114	10.18469143	9.691081492	10.03342376	9.798201619	10.19865709	10.13987909	10.04921802	10.28103337	9.846040057	9.888269377	9.945266655	9.875980993	10.17609126	9.815830017	9.911407989	9.929337169	9.854172392	10.15533604	10.18752072	10.03342376	10.32633586	10.38916608	10.10037055	10.20139712	10.2787536	10.29885308
BROX	10.18469143	10.55266822	9.74807944	9.927242007	10.10720997	10.00432137	10.31175386	9.880241776	9.996428483	10.32633586	10.29225607	10.55266822	10.26245109	9.695770526	9.775399256	9.871672158	9.873117069	10.23299611	9.744887286	9.832802601	10.22530928	10.20951501	10.05307844	10.2121876	9.626340367	10.22010809	9.930510952	10.52374647	10.42813479	10.20951501	10.56110138	9.770181651	9.953237645	10.13353891	10.02530587	10.29003461	9.894316063	10.22271647	10.23044892	10.08635983	10.2278867	10.51982799	10.43616265	10.81023252	10.65513843	10.38916608	10.62531245	10.34439227	10.43296929
VASN	9.083610106	9.007278248	8.6980048	8.678782336	8.674217946	8.333386814	9.413601486	8.686957851	8.644694562	8.844203715	8.520221437	8.464519355	8.46991034	8.346157304	8.302201013	8.312198522	8.318292951	8.902340183	7.973081654	7.830100862	8.673601423	8.508906619	8.64989927	9.119189882	8.539226696	8.943331254	8.270841814	9.202896809	8.756430702	9.055951406	9.033785517	8.667508988	8.676217912	8.633327035	8.254354694	9.365581573	8.613535278	8.612253907	8.425175422	8.662096446	9.085433298	8.042378602	9.066735796	9.216904499	8.947355287	9.224662529	8.738550671	8.427583475	7.70773195
SMIM5	9.802725848	9.938084212	8.79798039	9.091983333	9.2777467	9.158573556	9.823558993	8.923601465	9.140979164	9.470057502	9.416457433	9.673168413	9.411030147	7.858158083	9.033142177	9.07947068	8.772343715	9.588484599	8.699699008	8.703918718	9.496265251	9.514175721	9.325043348	9.524123385	8.759879277	9.45484486	8.955620413	9.779863335	9.514547753	9.841741031	9.900738442	8.833599665	9.131971346	9.289120518	9.189714843	9.83117204	8.935920204	9.550265053	9.513324162	9.308094652	9.544005998	9.800345845	9.752048448	10.00860017	9.861868814	9.622504147	9.798332921	9.984239188	9.931391755
LRP2	8.429348475	9.331751125	6.813320801	7.981909175	9.167317335	8.47599062	9.065766388	8.736292898	7.378670403	8.788797431	7.818898601	7.756270881	9.126975139	7.011866399	7.283663013	8.921457566	7.957712621	9.334493962	7.458985161	7.640769556	8.717470782	8.531785371	7.710083509	8.76092736	6.669605168	8.111833582	7.868744338	9.506329114	7.469483296	8.484356794	9.211947744	6.972744258	7.86422621	9.134686993	8.436273992	8.894803263	8.768911762	8.671246917	8.451479407	7.421077206	8.623321668	7.502317863	8.446506102	7.928037212	8.573730054	9.336499759	9.036509129	8.560588041	7.696627201
CPNE8	9.406455016	9.88592634	9.167110479	9.42107719	9.518816525	9.32170197	9.302439164	9.16571903	9.341157438	9.864469548	9.807535028	10.0211893	9.779596491	9.147923539	9.320312492	9.233884109	9.23416282	9.545096724	9.166104345	9.436464798	9.937853764	9.638259569	9.691488176	9.916290728	9.146376133	9.788875116	9.567579181	10.07188201	9.867467488	9.376576957	9.856324005	9.160078181	9.458063445	9.516085643	9.363969045	9.257678575	9.197996898	9.913681425	9.611181429	9.694833253	9.877992967	10.03342376	9.79239169	10.01703334	10.26245109	9.641880452	10.22010809	9.861534411	9.926764187
UEVLD	9.603945075	10.08278537	9.13293175	9.377725041	9.564689731	9.496929648	9.839056747	9.359399072	9.382863182	9.751194393	9.751502354	10.02938378	9.652033494	9.152074203	9.211547681	9.394311563	9.23509899	9.78460303	9.258373849	9.235528447	9.793643733	9.695341559	9.566943972	9.698100546	9.070591932	9.705187807	9.462772229	9.984077034	9.849443984	9.603393398	10.06445799	9.155275293	9.389166085	9.588529405	9.529468854	9.872191248	9.380283618	9.796602083	9.698778873	9.586350966	9.687020352	9.93789385	9.893389985	10.23044892	10.1271048	9.89580363	9.975395041	9.889536998	9.93278314
SVIP	8.778491315	8.939803698	8.686734556	8.564914501	8.549187247	8.487421213	8.85494335	8.533161738	8.846343299	8.719488732	8.554489161	8.691956276	8.626771369	8.662408368	8.405073027	8.417670943	8.476498321	8.698770184	8.545158616	8.489592901	8.510236607	8.731306665	8.655349767	8.757927184	8.496749809	8.653337959	8.485124928	8.751710105	8.964278492	8.793203482	8.908157835	8.778006462	8.600112163	8.574875874	8.524032436	8.838049001	8.541691548	8.494724928	8.738217514	8.677470075	8.760279204	8.931300195	8.907051091	9.111732857	8.707706405	8.789411474	9.011824096	8.841565931	9.117105503
MITD1	9.538850107	9.577870781	8.85984053	9.009663317	9.353935456	9.1491267	9.320291719	9.138839313	8.902530473	9.534711294	9.451356532	9.723808547	9.472566313	8.810434157	8.836457043	8.96966747	8.875460631	9.484641445	8.869841652	8.911125635	9.49140372	9.529969038	9.303951634	9.451878502	8.897220094	9.524551895	9.127299215	9.78209263	9.710218943	9.499989334	9.545987102	8.875153904	9.006637159	9.345197232	9.220918364	9.309630168	9.193569801	9.473165692	9.516350247	9.312832959	9.445604203	9.709159677	9.600297527	9.931432443	9.75822283	9.458683164	9.799492181	9.536634185	9.625579943
IGSF8	8.507032361	8.695814276	7.651723722	8.090293335	8.404114999	7.905531452	8.495405565	8.191870018	7.981320178	8.72245293	8.473413975	8.622607716	8.457987811	7.83463685	8.239499687	8.180699204	7.776933527	8.695411624	7.913273301	8.044069154	8.476251797	8.380970595	8.474478512	8.607862319	8.168733132	8.393206556	8.169439302	8.996695508	8.278822171	8.290257272	8.435892125	8.193096761	7.878986868	8.152655202	7.585009291	8.21505565	8.017659278	8.223988885	8.099542532	8.220552622	8.310969306	8.117470167	8.077186158	8.406403912	8.512470933	8.404662703	8.600700697	8.007363659	8.569327084
GALM	8.734343702	8.469733677	8.806878356	8.442996853	8.74739627	8.429590804	8.461228323	8.554040704	8.490927183	8.552607388	8.651433092	8.49651452	8.485267026	8.492536902	8.699751033	8.603166034	8.604280068	8.642682109	8.645156896	8.761852695	8.579634998	8.434824298	8.516231196	8.520680003	8.309481121	8.640978058	8.405192632	8.725780999	7.962819031	8.648876954	8.39276728	8.766278969	8.422343573	8.699751033	8.40286296	8.320063162	8.499260826	8.487025191	8.356044991	8.499920661	8.459844644	8.559535583	8.364851054	8.328114462	8.494613703	8.356484783	8.455803821	8.376686431	8.043872916
CMBL	9.462293156	9.665580991	9.53878731	9.474347407	9.664641976	9.495863351	9.286411556	9.621456716	9.697229343	9.475496855	9.55484033	9.603512446	9.421965688	9.614591416	9.407679772	9.639596045	9.677524831	9.673767142	9.602027418	9.68692213	9.441585174	9.317499221	9.559415822	9.433081456	9.417205887	9.523173965	9.551449998	9.654051339	8.903404737	9.410810964	9.582040624	9.516865762	9.429380791	9.610404621	9.437020843	9.197693975	9.58546073	9.370956965	9.259689423	9.51031708	9.365581573	9.343172179	9.308543072	9.146159056	9.468362102	9.266255223	9.664199936	9.202406573	9.063032965
PGM2	8.986373075	8.580582878	9.004364372	8.976767105	8.704176266	9.008216802	8.482358984	9.010935665	8.890264489	8.702404686	8.702016726	8.608600907	8.767586236	8.923425369	8.86846222	8.68209993	9.027390385	8.576537143	8.751040331	9.061527871	8.653444077	8.689086771	8.802657443	8.722658598	8.916306527	8.833707953	8.95924656	8.625528516	8.537793919	8.944295096	8.480897628	9.079072659	9.016281025	8.744011188	9.051075308	8.597782914	9.10720997	8.634336178	8.580503016	8.837676804	8.808987012	7.464116809	8.287084779	7.819201636	8.306360685	8.326970452	7.525627809	8.275127002	7.436925587
CNDP2	10.1430148	10.02938378	10.76417613	10.50242712	10.29885308	10.5865873	10.01703334	10.70156799	10.35983548	10.10720997	10.18469143	10	10.10380372	10.42160393	10.62117628	10.35983548	10.55990663	10.08278537	10.35602586	10.66370093	10.10380372	9.795358551	10.2787536	10.0374265	10.24054925	10.45024911	10.28330123	10.07918125	9.610904917	10.15836249	9.985426474	10.74741181	10.49276039	10.30963017	10.58883173	9.973058546	10.68124124	10.09691001	9.844321821	10.30749604	10.04532298	9.781137591	9.803457116	9.576617736	9.861641926	9.962056645	9.721183856	9.800840752	9.634457117
SNX18	9.336379672	10.05690485	8.604290869	8.9733588	9.113976759	8.871409461	10.12057393	8.787920739	9.152104801	9.281033367	9.230295614	9.489494422	9.30588853	8.753023555	8.818957901	9.32621293	9.100921681	9.604204446	8.964160595	8.594746032	9.4840862	9.657572108	9.235528447	9.595782718	8.801479174	9.352182518	9.014604534	9.554416469	9.660429068	9.334795423	10.06818586	8.647470995	9.013047997	9.152685756	8.940277358	10.13987909	8.931025396	9.503790683	9.678500169	9.307774069	9.611595868	9.688651147	9.614876133	9.869906113	9.975959994	9.817201653	9.73172572	10.07918125	9.917279639
PARK7	9.993876915	9.427112676	10.38560627	10.1931246	10.02938378	10.26481782	9.486359626	10.28780173	10.28103337	10.0211893	10.02530587	9.925595683	10.04921802	10.22010809	10.24054925	10.13353891	10.25042	9.852260351	10.21484385	10.33243846	9.625353614	9.426511262	10.09342169	9.96686886	10.13987909	10.13672057	10.1430148	9.836444385	9.304533611	9.948344491	9.345158	10.34439227	10.16435286	9.977009862	10.23552845	9.411670203	10.25527251	9.540967307	9.351003499	10.04921802	9.911360055	9.386338417	9.222742476	9.410709765	9.48995848	9.413702013	9.410541048	9.493276767	9.481915365
MXRA8	8.901845037	8.97017945	8.204960617	8.302612287	8.675833313	8.101678354	8.849480838	8.444325904	8.5029867	8.882439151	8.591999006	8.385713495	8.687947894	7.873779659	8.343388899	8.456912355	7.781855868	8.81741992	8.056218585	7.953048979	8.577158484	8.584647783	8.79239169	9.236386089	8.600123069	8.980089768	8.134081441	9.25437887	8.633589638	8.831370593	8.896454565	8.161278142	8.264085517	8.614443712	8.026369816	8.796199541	8.42134064	8.491963686	8.484328318	8.742057077	9.163191202	8.640163303	9.060168812	9.338496336	8.721794134	9.143014801	8.583946524	8.27877646	8.046300024
CDHR2	7.317018122	8.145662474	0	6.881384714	7.761604635	7.157638094	7.652217332	7.292632614	7.192260747	7.282146122	7.32006318	0	6.577112603	7.321743399	6.720060107	7.513457342	6.705744094	7.923145545	0	6.887583602	8.102399403	7.880075814	7.195982658	7.119618783	0	7.447406144	7.315067271	7.845147677	7.251443559	6.906421299	8.152655202	0	0	7.775253554	7.062393975	7.638509234	7.303908515	7.915098949	7.754157151	7.227732516	7.125253519	0	7.598713935	7.156518895	7.520404933	7.792818776	7.578696512	7.574644649	0
UBTD1	8.794090517	8.956475787	7.595925906	7.984837739	8.338954254	7.818872241	8.92458422	7.349374694	7.974189196	8.600384732	8.592543144	8.80059337	8.51345733	8.125123276	7.120804211	8.227552506	7.702309891	8.577951129	8.172661303	7.390440524	8.605595916	8.698726732	8.408629978	8.777876111	8.059676997	8.411198676	8.209380955	8.893062335	8.974244495	8.923228471	9.059752695	8.468125697	8.372801577	8.562173865	8.395763091	9.090927853	8.58746401	8.710498159	8.769207416	8.565269162	8.844657318	9.050070265	8.828969077	9.225180008	9.216297887	8.913432354	9.024649832	8.959499308	8.952598735
SIAE	7.650220082	7.477439635	7.650025684	7.450833949	7.421126615	7.268016044	7.401228185	7.512831106	7.611595879	7.544179718	0	0	7.326561164	7.576859441	7.447220084	7.527797413	7.445884318	7.767816093	7.422557029	7.428847246	7.367449126	7.385338126	7.508664377	7.459347261	7.536672064	7.299485529	7.357534674	7.641712025	0	7.757244159	7.426055599	7.652081887	7.456988192	7.400589808	7.334514086	7.37388625	7.512190612	7.32721587	7.359816536	7.502536376	7.417654357	7.346998088	7.45118754	0	7.481370971	0	0	7.535218156	0
GLOD4	9.557819878	9.206069924	9.553227451	9.508421974	9.397209781	9.513057708	9.039255444	9.48995848	9.547774706	9.371474246	9.403257826	9.276875221	9.388598472	9.506044788	9.404251988	9.416074391	9.482230237	9.204960614	9.486982737	9.543534155	9.088561312	9.074304344	9.507302536	9.470910069	9.573475015	9.42876633	9.479560915	9.279530065	8.963547011	9.515052144	9.143982293	9.519827994	9.486628806	9.367430472	9.48945221	8.999730654	9.480323201	9.024772913	9.003288159	9.471819586	9.410574797	9.089905112	8.976230727	9.047235916	9.048130927	9.115843404	9.008600172	9.022675762	9.010087847
DPP3	9.180097189	8.658888645	9.385927854	9.272491401	9.014352501	9.321639849	8.644172614	9.447437131	9.216719967	8.973053925	9.064719985	8.983211187	8.973746514	9.206933762	9.292433298	9.154058611	9.255369005	8.933097362	9.150480123	9.10335894	8.862846661	8.802102958	9.160888516	9.015820635	9.312452407	9.131105162	9.212187605	8.845141468	8.459528185	9.071440128	8.524824364	9.367784412	9.275610765	8.953643736	9.290857877	8.483044983	9.454219636	8.734391738	8.652033495	9.130912442	8.897890887	8.568753047	8.439174741	8.427063945	8.535281459	8.58496411	8.537315274	8.607165398	8.490941207
CHMP5	10.31806333	10.38201704	9.593684726	9.791697665	10.0211893	9.92717011	10.03342376	9.757441582	9.853977919	10.17609126	10.2380461	10.51054501	10.16731733	9.674199555	9.592143434	9.754470655	9.706222626	10.23552845	9.630671906	9.812063982	10.1931246	10.04532298	9.962421429	10.22010809	9.344431575	10.1271048	9.855161639	10.33445375	10.45331834	10.33041377	10.39619935	9.531478917	9.78955251	10.01703334	9.894609555	9.986771734	9.856753051	10.18469143	10.09342169	9.973391123	10.23299611	10.50379068	10.36921586	10.61066016	10.62013605	10.11394335	10.53147892	10.20682588	10.29666519
SPRR3	8.703291379	7.601016443	5.568719048	8.074414134	7.750847683	7.322632732	7.759350513	6.052078416	8.631960962	8.755669089	8.923617	10.05307844	8.534850737	7.367486395	6.965667318	7.904114803	7.210291787	8.767867971	7.269162589	0	8.956998753	9.34982127	8.444669232	8.097430857	0	8.206744947	8.049218027	8.664604374	9.30535137	8.720771022	7.73770936	0	8.146159059	7.787595071	7.463534675	7.745683634	6.182472003	8.924424027	9.3143729	8.5463699	8.196839149	8.857700285	9.767155866	9.334152053	9.061565562	8.472683331	9.419228564	8.815092715	9.214843848
GRHPR	9.158181499	9.048014291	9.52526514	9.397435935	9.303390474	9.445930969	8.870784186	9.458139068	9.447994793	9.176062305	9.275955982	9.170994702	9.30455515	9.363593179	9.52995622	9.365955723	9.409933124	9.240998286	9.359228184	9.456366033	9.057437869	8.900372592	9.264747009	9.092931076	9.279461609	9.217483944	9.415707687	9.130333769	8.525524212	9.119453851	9.01317441	9.521909187	9.407118854	9.260881951	9.462397998	8.783560581	9.445728714	8.994149915	8.829348809	9.230321169	9.060697841	8.622897577	8.658240416	8.645461571	9.00655161	8.946727297	9.060168812	8.713666914	8.403034685
PEF1	9.360157765	9.499081948	9.22065715	9.386267042	9.230142253	9.467977875	9.220604888	9.309140246	9.196563035	9.567485134	9.751556225	9.615455537	9.618006235	9.131714879	9.511883361	9.328277645	9.392978187	9.250420003	9.225205866	9.615865919	9.483273408	9.432953265	9.365019743	9.606381365	9.068779363	9.520260761	9.368026416	9.726727209	10.17318627	9.38813674	9.589033156	9.420219878	9.503095801	9.32933685	9.588114772	9.294069228	9.427761919	9.55866058	9.447685069	9.480323201	9.627959533	9.827324032	9.458607636	9.683506319	10.11058971	9.440720217	9.857935265	9.791746774	9.641097162
DMBT1	7.439664226	8.792034301	6.615992217	7.385892153	0	7.277677986	0	7.52383749	7.956475792	7.712952601	7.677506588	0	7.708981475	0	7.477135745	7.94125297	0	6.899640019	7.791107932	0	9.741640004	9.849001504	8.430187972	8.76943641	7.918344934	7.69337516	8.054995865	8.133379215	8.605563607	7.22170109	8.784660079	0	7.366011836	0	7.254185434	6.941928682	6.980862061	9.746634199	9.845302731	8.438304966	8.767133595	0	0	0	0	8.808966785	0	0	0
NDRG2	8.651830226	8.380156953	8.751256003	8.744957611	8.67249501	8.466318849	8.360631277	9.038739349	8.479287318	8.699941737	8.659136242	8.486572152	8.640978058	8.774349055	8.839094493	8.76279856	8.609113966	8.736770871	8.751402291	8.909609511	8.597651317	8.607937306	8.610116956	8.593119852	8.610692096	8.294906913	8.563006188	8.659259987	8.808757719	8.631393032	8.272421829	8.745714827	8.79408354	8.659421755	8.417405259	8.336579801	9.044108388	8.516059175	8.575626539	8.583765369	8.546073571	7.931320548	8.5628755	8.17295303	8.197473538	8.555904216	0	8.132163599	8.061603253
ITM2B	9.697185737	9.606553329	9.049024098	9.09680577	9.536116348	9.040404529	9.691514686	9.182585826	9.108869329	9.436162647	9.235528447	9.209997296	9.364851052	8.912785158	8.976680046	9.17283636	8.513776762	9.514919467	8.836115149	8.830524515	9.418301291	9.166341292	9.324776159	9.951439522	9.143576832	9.683605315	8.966169903	10.00860017	9.622545577	9.616937395	9.621321715	9.167435494	9.178343739	9.584082339	9.12113289	9.699108956	9.243881002	9.442965531	9.167848799	9.460085599	9.993378909	9.570391144	9.638848525	10.04532298	9.654012808	9.557073894	9.559727128	9.134304635	9.084433277
CRYL1	9.295874845	9.436226275	9.435780682	9.236436486	9.475206143	9.268905441	9.188422215	9.447282098	9.287219296	9.4244079	9.272560964	9.175975432	9.445604203	9.352780468	9.396617743	9.353127287	9.428232013	9.379359915	9.335578243	9.428069969	9.255971639	9.113943353	9.241322303	9.202270298	9.186984572	9.294355985	9.257702569	9.335217117	8.806803825	9.217141638	9.378561412	9.431363764	9.230270058	9.434904076	9.24007476	9.120541029	9.42313114	9.184691431	9.072874597	9.230167817	9.145413965	9.084075568	9.247973267	9.030842503	9.29666519	9.089127629	9.487619087	9.211093831	9.04363731
CD2AP	9.726784242	9.915732157	9.484883253	9.469556942	9.609871757	9.539050994	9.981365509	9.476367825	9.582063363	9.653820101	9.618278264	9.803962133	9.604226053	9.358715114	9.452813409	9.408697769	9.526817255	9.667966331	9.389821463	9.429800712	9.665055393	9.717037736	9.611447141	9.625178643	9.354722935	9.655484195	9.48732224	9.819853096	9.910176007	9.671709592	9.852479994	9.46732687	9.445604203	9.573092177	9.507302536	9.924826979	9.455362657	9.595496222	9.655138435	9.585099607	9.559798935	9.828775865	9.65337655	9.991013308	10.03342376	9.736276955	9.93035803	9.754080642	9.832860038
FCGBP	6.703669694	7.846980041	8.087710452	9.186419489	8.144075809	7.135514313	7.48337332	9.082964794	6.96797836	8.010257547	7.806878362	7.247899675	8.623280311	8.760090605	8.287488211	8.840281786	7.985242302	8.243286149	7.403703783	8.669428463	9.126066437	9.283572578	7.090716484	7.614264298	8.355394047	6.280760654	7.631058019	7.327236313	9.169791954	6.262925706	7.641781389	7.632254787	9.197693975	7.779444974	6.825283342	7.191395145	9.077948999	9.1244064	9.24012473	7.101368998	6.998215776	0	6.968655745	0	0	8.914110343	6.053001955	6.958047631	6.254451637
[truncated: 336 more columns]
